# Supplementary material for: Catechol/ o -benzoquinone exchange at gold( iii )
Source: Royal Society of Chemistry journal article supplement (doi:10.1039/d4sc04374j), 2024-01-01
Supplement: d4sc04374j1.pdf [file d4sc04374j1.pdf]

## Table of Content

|                                                                                         |     |
|-----------------------------------------------------------------------------------------|-----|
| 1. Materials and methods                                                                | S2  |
| 2. Preparation of sodium catecholates                                                   | S2  |
| 3. Preparation of 1,2-benzoquinones                                                     | S3  |
| 4. Preparation of <i>nido</i> -P <sup>^</sup> PAuCl <sub>2</sub> precursor ( <b>6</b> ) | S3  |
| 5. Preparation of P <sup>^</sup> C catecholate complexes ( <b>3a-d</b> )                | S4  |
| 6. Preparation of P <sup>^</sup> P catecholate complexes ( <b>7a-d</b> )                | S6  |
| 7. NMR spectra                                                                          | S9  |
| 8. Isomerization experiment                                                             | S29 |
| 9. Catechol exchange experiments                                                        | S33 |
| 10. EPR analyses                                                                        | S48 |
| 11. Metrical parameters for the P <sup>^</sup> C gold(III) complexes                    | S51 |
| 12. Crystallographic data                                                               | S52 |
| 13. Computational details                                                               | S54 |
| 14. Z-matrices                                                                          | S73 |
| 15. References                                                                          | S95 |

## 1. Materials and Methods

All reactions and manipulations were carried out under an atmosphere of dry argon using standard Schlenk techniques or in a glovebox under an inert atmosphere unless stated otherwise. All reagents were purchased from commercial sources and used without further purification. Dry, oxygen-free solvents were employed. Solution  $^1\text{H}$ ,  $^{13}\text{C}$ ,  $^{31}\text{P}$  and  $^{11}\text{B}$  NMR spectra were recorded on a Bruker Avance 300, 400 or 500 spectrometer at 298 K unless otherwise stated. Chemical shifts ( $\delta$ ) are expressed with a positive sign, in parts per million.  $^1\text{H}$  and  $^{13}\text{C}$  chemical shifts are referenced internally to residual protio ( $^1\text{H}$ ) or deuterio ( $^{13}\text{C}$ ) solvent, while  $^{31}\text{P}$  and  $^{11}\text{B}$  chemical shifts are relative to 85%  $\text{H}_3\text{PO}_4$  and  $\text{BF}_3\text{-OEt}_2$  respectively. The following abbreviations and their combination are used: br, broad; s, singlet; d, doublet; t, triplet; m, multiplet. The  $^1\text{H}$  and  $^{13}\text{C}$  resonance signals were attributed by means of 2D HSQC, HMBC and NOESY experiments. Mass spectra were recorded on a Waters UPLC Xevo G2 QTOF apparatus. X-Band EPR data were recorded using an ELEXYS 500 EPR spectrometer from Brüker. Measurements were performed with different modulation amplitudes and number of scans (from 8 to 32). VT UV-vis experiments were performed with an Optistat DN optical cryostat, using a PerkinElmer Lambda 750 UV-Vis spectrometer. *i*PrPAul<sub>2</sub> (**1**) and *closo*-carboranyl diphosphine (**5**) were prepared according to previously reported procedures.<sup>[1-2]</sup> 3,5-di-*tert*-butyl-*o*-benzoquinone (**4b**) and *o*-chloranil (**4d**) are commercially available.

## 2. Preparation of sodium catecholates

Sodium catecholates (**2a-d**) were prepared by an alternative method to that reported in the literature.<sup>[3-4]</sup> NaH (10 mmol) was suspended in pentane (10 ml), the corresponding catechol (5 mmol, 0.5 equiv.) was added in one portion and the mixture was stirred for 30 minutes at room temperature, after which a large amount of white precipitate appeared. The volatiles were evaporated *in vacuo* and the resulting off white solid was placed inside the glovebox. All the catecholates were obtained in quantitative yields, and used without further purification.

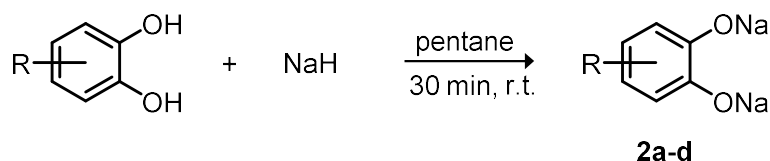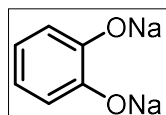

**2a.**  $^1\text{H}$  NMR (300 MHz, MeOD):  $\delta$  (ppm) 6.62-6.68 (m,  $\text{CH}_{\text{cat}}$ , 2H), 6.40-6.46 (m,  $\text{CH}_{\text{cat}}$ , 2H).

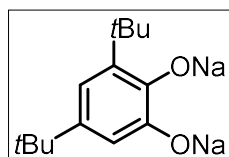

**2b.**  $^1\text{H}$  NMR (300 MHz, MeOD):  $\delta$  (ppm) 6.66(d,  $^4J_{\text{HH}} = 2.3$  Hz,  $\text{CH}_{\text{cat}}$ , 1H), 6.42(d,  $^4J_{\text{HH}} = 2.3$  Hz,  $\text{CH}_{\text{cat}}$ , 1H), 1.38 (s,  $\text{C}(\text{CH}_3)_3$ , 9H), 1.25 (s,  $\text{C}(\text{CH}_3)_3$ , 9H).

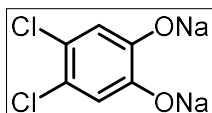

**2c.**  $^1\text{H NMR}$  (300 MHz, MeOD):  $\delta$  (ppm) 6.87 (s,  $\text{CH}_{\text{cat}}$ , 2H).

### 3. Preparation of 1,2-benzoquinones

Non-commercial 1,2-benzoquinones **4a** and **4c** were prepared by a previously reported method.<sup>[5]</sup> To a solution of the corresponding catechol (1 mmol) in a mixture of  $\text{H}_2\text{O}/\text{Et}_2\text{O}$  (1/1) in an ice bath ( $0^\circ\text{C}$ ) was added in one portion  $\text{NaIO}_4$  (1.2 mmol, 1.2 equiv.). The mixture was stirred for 10 minutes and the ethereal phase was transferred *via* cannula to a Schlenk with anhydrous magnesium sulphate under argon in an ice bath ( $0^\circ\text{C}$ ) and stirred for 30 min. After this time, the heterogenous mixture was filtered with a cannula and transferred to a Schlenk in an ice bath ( $0^\circ\text{C}$ ) where the volatiles were evaporated *in vacuo*. The resulting solid was transferred to a vial and stored in the glovebox freezer. The formation of the target compounds was verified by  $^1\text{H NMR}$  and they were used without further purification.

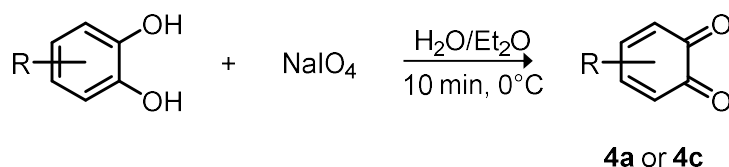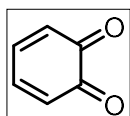

**4a.** Obtained as an intense red crystalline material (71 %).  $^1\text{H NMR}$  (300 MHz,  $\text{CD}_2\text{Cl}_2$ ):  $\delta$  (ppm) 6.97-7.01 (m,  $\text{CH}_{\text{cat}}$ , 2H), 6.30-6.34 (m,  $\text{CH}_{\text{cat}}$ , 2H).

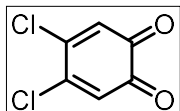

**4c.** Obtained as an orange solid (65 %).  $^1\text{H NMR}$  (300 MHz,  $\text{CD}_2\text{Cl}_2$ ):  $\delta$  (ppm) 6.68 (s,  $\text{CH}_{\text{cat}}$ , 2H).

### 4. Preparation of *nido*-P<sup>^</sup>PAuCl<sub>2</sub> precursor (**6**)

Over a solution of **5** (0.34 mmol) in  $\text{CH}_2\text{Cl}_2$  (50 ml)  $\text{DMSAuCl}$  (0.34 mmol, 1 equiv.) was added under air. After 30 minutes dichloro(phenyl)- $\lambda^3$ -iodane (0.40 mmol, 1.2 equiv.) was added in several portions and the mixture stirred for 1 hour. After this time, the solvent was evaporated and the remaining solid was washed with EtOH (3 x 10 ml) and dried *in vacuo* to give **6** as an off-white solid (89%). X-Ray quality crystals were obtained from a  $\text{CD}_2\text{Cl}_2$  solution at room temperature.

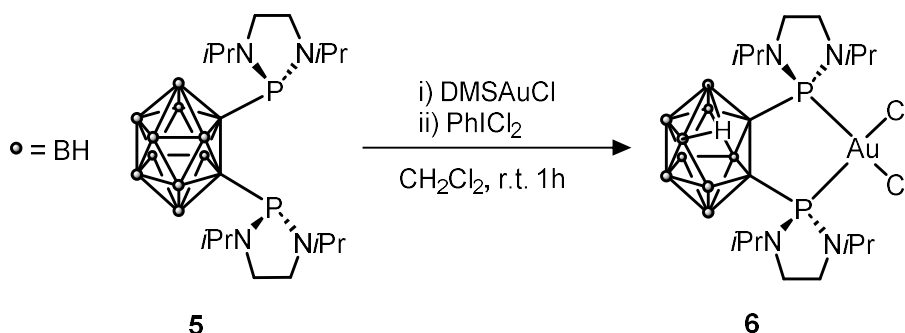

**$^1\text{H}$  NMR** (500 MHz,  $\text{CD}_2\text{Cl}_2$ ):  $\delta$  (ppm) 3.66-3.78 (m,  $2\times\text{CH}(\text{CH}_3)_2$  &  $2\times\text{N}(\text{CH}_2)_2\text{N}$ , 6H), 3.39-3.50 (m,  $2\times\text{CH}(\text{CH}_3)_2$  &  $2\times\text{N}(\text{CH}_2)_2\text{N}$ , 6H), 1.47 (d,  $^3J_{\text{HH}} = 6.7$  Hz,  $\text{CH}(\text{CH}_3)_2$ , 12H), 1.42 (d,  $^3J_{\text{HH}} = 6.7$  Hz,  $2\times\text{CH}(\text{CH}_3)_2$ , 6H), 1.33 (d,  $^3J_{\text{HH}} = 6.7$  Hz,  $\text{CH}(\text{CH}_3)_2$ , 6H), 0.25-3.00 (bs,  $\sim 9\text{H}$ , BH), -2.67 (bs, BHB, 1H).  **$^{13}\text{C}\{^1\text{H}\}$  NMR** (125.8 MHz,  $\text{CD}_2\text{Cl}_2$ ):  $\delta$  (ppm) 56.6 (bs,  $2\times\text{C}_{\text{carborane}}$ ), 48.1 (d,  $^3J_{\text{CP}} = 7$  Hz,  $2\times\text{CH}(\text{CH}_3)_2$ ), 47.2 (d,  $^3J_{\text{CP}} = 7$  Hz,  $2\times\text{CH}(\text{CH}_3)_2$ ), 42.3 (d,  $^2J_{\text{CP}} = 5$  Hz,  $2\times\text{N}(\text{CH}_2\text{CH}_2)\text{N}$ ), 41.3 (d,  $^2J_{\text{CP}} = 5$  Hz,  $2\times\text{N}(\text{CH}_2\text{CH}_2)\text{N}$ ), 21.1 (s,  $\text{CH}(\text{CH}_3)_2$ ), 21.0 (d,  $^3J_{\text{CP}} = 7$  Hz,  $\text{CH}(\text{CH}_3)_2$ ), 20.6 (d,  $^3J_{\text{CP}} = 7$  Hz,  $\text{CH}(\text{CH}_3)_2$ ), 20.2 (s,  $\text{CH}(\text{CH}_3)_2$ ).  **$^{31}\text{P}$  NMR** (202.5 MHz,  $\text{CD}_2\text{Cl}_2$ ):  $\delta$  (ppm) 116.1 (s).  **$^{11}\text{B}$  NMR** (160.5 MHz):  $\delta$  (ppm) -8.5, -15.4, -19.7, -26.9, -33.1. **HRMS** (ESI) calcd. for  $[\text{M}-\text{H}]^- = \text{C}_{18}\text{H}_{45}\text{AuB}_9\text{Cl}_2\text{N}_4\text{P}_2$ : 744.3058, found 744.3051.

## 5. Preparation of P<sup>^</sup>C catecholate complexes (3a-d)

A mixture of **1** (0.3 mmol) and the corresponding sodium catecholate (**2a-d**) (0.45 mmol, 1.5 equiv.) in MeOH (2 ml) was stirred vigorously for 2 hours at room temperature, under argon atmosphere. After this time the supernatant was removed by cannula filtration and the precipitate was washed with MeOH (3 x 2 ml). The remaining solid was dried *in vacuo* for 1 hour.

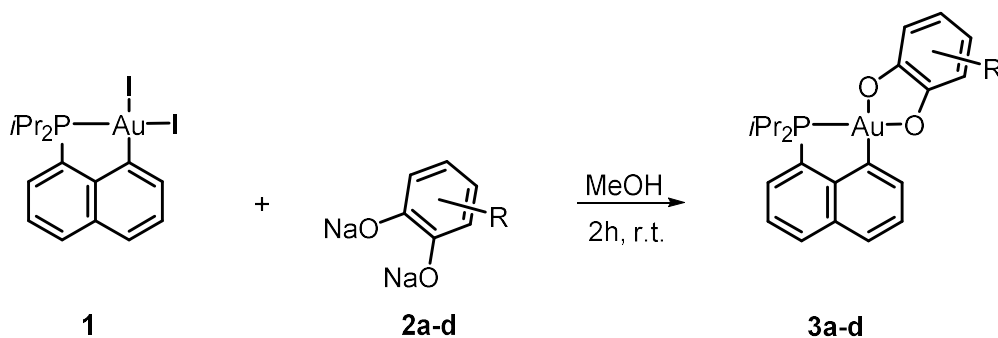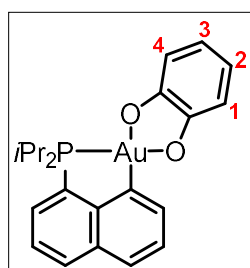

**3a.** Obtained as an orange powder (76 %).  **$^1\text{H}$  NMR** (500 MHz,  $\text{CD}_2\text{Cl}_2$ ):  $\delta$  (ppm) 8.43 (dd,  $^3J_{\text{HH}} = 7.6$  Hz,  $^4J_{\text{HH}} = 1.6$  Hz,  $\text{CH}_{\text{Naphth}}$ , 1H), 8.07 (dd,  $^3J_{\text{HH}} = 8.1$  Hz,  $^5J_{\text{HP}} = 2.9$  Hz,  $\text{CH}_{\text{Naphth}}$ , 1H), 7.85 (dd,  $^3J_{\text{HH}} = 8.2$  Hz,  $^4J_{\text{HH}} = 2.5$  Hz,  $\text{CH}_{\text{Naphth}}$ , 1H), 7.71-7.77 (m,  $\text{CH}_{\text{Naphth}}$ , 1H), 7.54-7.67 (m,  $\text{CH}_{\text{Naphth}}$ , 2H), 6.72-6.75 (m,  $\text{H}_1$ , 1H), 6.58-6.61 (m,  $\text{H}_2$ , 1H), 6.50-6.47 (m,  $\text{H}_{2-3}$ , 2H), 2.96-3.09 (m,  $2\times\text{CH}(\text{CH}_3)_2$ , 2H), 1.45 (dd,  $^3J_{\text{HP}} = 19.1$  Hz,  $^3J_{\text{HH}} = 7.1$  Hz,  $\text{CH}(\text{CH}_3)_2$ , 6H), 1.32 (dd,  $^3J_{\text{HP}} = 18.1$  Hz,  $^3J_{\text{HH}} = 7.1$  Hz,  $\text{CH}(\text{CH}_3)_2$ , 6H).  **$^{13}\text{C}\{^1\text{H}\}$  NMR** (125.8 MHz,  $\text{CD}_2\text{Cl}_2$ ):  $\delta$  (ppm) 163.0 (d,  $^3J_{\text{CP}} = 5$  Hz,  $\text{OCCat}$ ), 160.3 (d,  $^3J_{\text{CP}} = 5$  Hz,  $\text{OCCat}$ ), 148.2 (d,  $^2J_{\text{CP}} = 24$  Hz,  $\text{C}_{\text{q-Naphth}}$ ), 140.1 (s,  $\text{C}_{\text{q-Naphth}}$ ), 134.5 (d,  $^3J_{\text{CP}} = 14$  Hz,  $\text{C}_{\text{q-Naphth}}$ ), 133.5 (d,  $^3J_{\text{CP}} = 3$  Hz,  $\text{CH}_{\text{Naphth}}$ ), 130.7 (d,  $^3J_{\text{CP}} = 3$  Hz,  $\text{CH}_{\text{Naphth}}$ ), 130.3 (s,  $\text{CH}_{\text{Naphth}}$ ), 128.6 (s,  $\text{CH}_{\text{Naphth}}$ ), 127.3 (s,  $\text{CH}_{\text{Naphth}}$ ), 130.3 (s,  $\text{CH}_{\text{Naphth}}$ ), 126.7 (d,  $^3J_{\text{CP}} = 10$  Hz,  $\text{CH}_{\text{Naphth}}$ ), 125.2 (d,  $^1J_{\text{CP}} = 59$  Hz,  $\text{C}_{\text{q-Naphth}}$ ), 117.9 (s,  $2\times\text{CH}_{\text{cat}}$ ), 117.3 (d,  $^4J_{\text{CP}} = 4$  Hz,  $\text{CH}_{\text{cat}}$ ), 115.9 (d,  $^4J_{\text{CP}} = 5$  Hz,  $\text{CH}_{\text{cat}}$ ), 26.4 (d,  $^1J_{\text{CP}} = 32$  Hz,  $2\times\text{CH}(\text{CH}_3)_2$ ), 17.9 (s,  $\text{CH}(\text{CH}_3)_2$ ), 17.8 (s,  $\text{CH}(\text{CH}_3)_2$ ).  **$^{31}\text{P}$  NMR** (202.5 MHz,  $\text{CD}_2\text{Cl}_2$ ):  $\delta$  (ppm) 88.7. **HRMS** (DCI) calcd. for  $[\text{M}]^+ = \text{C}_{22}\text{H}_{24}\text{O}_2\text{PAu}$ : 548.1180, found 548.1186. X-Ray quality crystals were obtained from a dichloromethane solution of **3a** at room temperature.

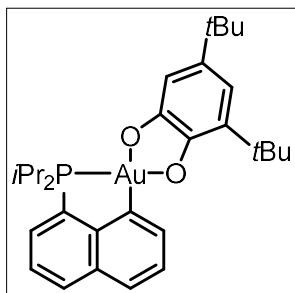

**3b-1.** After the reaction, a mixture of **3b-1** and **3b-2** (86/14) was obtained. By successive methanol washings (6 x 2 mL), **3b-1** could be obtained in a pure form as an orange powder (68 %).  $^1\text{H NMR}$  (500 MHz,  $\text{CD}_2\text{Cl}_2$ ):  $\delta$  (ppm) 8.55 (d,  $^3J_{\text{HH}} = 7.1$  Hz,  $\text{CH}_{\text{Naphth}}$ , 1H), 8.06 (dd,  $^3J_{\text{HH}} = 8.1$  Hz,  $^5J_{\text{HP}} = 2.9$  Hz,  $\text{CH}_{\text{Naphth}}$ , 1H), 7.84 (dd,  $^3J_{\text{HH}} = 8.1$  Hz,  $^4J_{\text{HH}} = 2.5$  Hz,  $\text{CH}_{\text{Naphth}}$ , 1H), 7.70-7.76 (m,  $\text{CH}_{\text{Naphth}}$ , 1H), 7.56-7.66 (m,  $\text{CH}_{\text{Naphth}}$ , 2H), 6.55 (s,  $\text{CH}_{\text{cat}}$ , 2H), 2.95-3.07 (m,  $\text{CH}(\text{CH}_3)_2$ , 2H), 1.56 (s,  $\text{C}(\text{CH}_3)_3$ , 9H), 1.45 (dd,  $^3J_{\text{HP}} = 19.3$  Hz,  $^3J_{\text{HH}} = 7.1$  Hz,  $\text{CH}(\text{CH}_3)$ , 6H), 1.27-1.36 (m,  $\text{CH}(\text{CH}_3)_2$  &  $\text{C}(\text{CH}_3)_3$ , 15H).  $^{13}\text{C}\{^1\text{H}\}$  NMR (125.8 MHz,  $\text{CD}_2\text{Cl}_2$ ):  $\delta$  (ppm) 162.3 (d,  $^3J_{\text{CP}} = 5$  Hz,  $\text{OC}_{\text{cat}}$ ), 156.1 (d,  $^3J_{\text{CP}} = 4$  Hz,  $\text{OC}_{\text{cat}}$ ), 148.3 (d,  $^2J_{\text{CP}} = 24$  Hz,  $\text{C}_{\text{q-Naphth}}$ ), 141.1 (s,  $\text{C}_{\text{q-Naphth}}$ ), 139.8 ( $\text{C}_{\text{q-Cat}}$ ), 135.6 (d,  $^4J_{\text{CP}} = 5$  Hz,  $\text{C}_{\text{q-Cat}}$ ), 134.5 (d,  $^3J_{\text{CP}} = 13$  Hz,  $\text{C}_{\text{q-Naphth}}$ ), 133.4 (d,  $^4J_{\text{CP}} = 3$  Hz,  $\text{CH}_{\text{Naphth}}$ ), 130.8 (d,  $^4J_{\text{CP}} = 1$  Hz,  $\text{CH}_{\text{Naphth}}$ ), 130.7 (d,  $^3J_{\text{CP}} = 3$  Hz,  $\text{CH}_{\text{Naphth}}$ ), 128.6 (s,  $\text{CH}_{\text{Naphth}}$ ), 127.0 (s,  $\text{CH}_{\text{Naphth}}$ ), 126.6 (d,  $^2J_{\text{CP}} = 10$  Hz,  $\text{CH}_{\text{Naphth}}$ ), 125.6 (d,  $^1J_{\text{CP}} = 58$  Hz,  $\text{C}_{\text{q-Naphth}}$ ), 113.0 (s,  $\text{CH}_{\text{cat}}$ ), 111.3 (s,  $\text{CH}_{\text{cat}}$ ), 34.9 (s,  $\text{C}(\text{CH}_3)_3$ ), 34.3 (s,  $\text{C}(\text{CH}_3)_3$ ), 32.3 (s,  $\text{C}(\text{CH}_3)_3$ ), 30.0 (s,  $\text{C}(\text{CH}_3)_3$ ), 26.3 (d,  $^1J_{\text{CP}} = 32$  Hz,  $2\times\text{CH}(\text{CH}_3)_2$ ), 17.9 (d,  $^2J_{\text{CP}} = 1$  Hz,  $\text{CH}(\text{CH}_3)_2$ ), 17.8 (s,  $\text{CH}(\text{CH}_3)_2$ ).  $^{31}\text{P NMR}$  (202.5 MHz,  $\text{CD}_2\text{Cl}_2$ ):  $\delta$  (ppm) 85.6. HRMS (DCI) calcd. for  $[\text{M}]^+ = \text{C}_{30}\text{H}_{40}\text{AuO}_2\text{P}$ : 660.2432, found 660.2414. The position of *t*Bu groups could be assigned based on  $^1\text{H}$ - $^1\text{H}$  NOESY experiments, which showed an interaction between the methyl protons and the *o*-Au-Ar proton, see Figure S14).

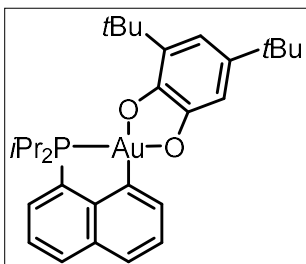

**3b-2.** From the reaction mixture (**3b-1/3b-2**=86/14), **3b-2** could not be obtained in a pure form. **3b-2** could be only characterized by  $^1\text{H}$  and  $^{31}\text{P}$  NMR as a minor product in mixture with **3b-1**.  $^1\text{H NMR}$  (500 MHz,  $\text{CD}_2\text{Cl}_2$ ):  $\delta$  (ppm) Most of the signals are totally overlapped with the ones of **3b-1**, the exceptions to this are: 8.45 (d,  $^3J_{\text{HH}} = 7.1$  Hz,  $\text{CH}_{\text{Naphth}}$ , 1H), 6.75 (d,  $^4J_{\text{HH}} = 2.2$  Hz,  $\text{CH}_{\text{cat}}$ , 1H), 6.60 (d,  $^4J_{\text{HH}} = 2.2$  Hz,  $\text{CH}_{\text{cat}}$ , 1H).  $^{31}\text{P NMR}$  (202.5 MHz,  $\text{CD}_2\text{Cl}_2$ ):  $\delta$  (ppm) 87.8. X-ray quality crystals of **3b-2** were obtained in the isomerization experiments, from  $\text{CD}_2\text{Cl}_2$  at room temperature.

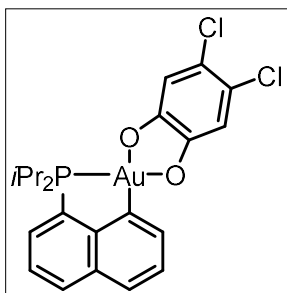

**3c.** Obtained as an orange powder (81 %).  $^1\text{H NMR}$  (500 MHz,  $\text{CD}_2\text{Cl}_2$ ):  $\delta$  (ppm) 8.33 (dd,  $^3J_{\text{HH}} = 7.3$  Hz,  $^4J_{\text{HH}} = 2.3$  Hz,  $\text{CH}_{\text{Naphth}}$ , 1H), 8.08 (dd,  $^3J_{\text{HH}} = 8.1$  Hz,  $^5J_{\text{HP}} = 3.0$  Hz,  $\text{CH}_{\text{Naphth}}$ , 1H), 7.86 (dd,  $^3J_{\text{HH}} = 8.1$  Hz,  $^4J_{\text{HH}} = 2.9$  Hz,  $\text{CH}_{\text{Naphth}}$ , 1H), 7.72-7.75 (m,  $\text{CH}_{\text{Naphth}}$ , 1H), 7.67-7.63 (m,  $\text{CH}_{\text{Naphth}}$ , 1H), 7.56 (t,  $^3J_{\text{HH}} = 7.9$  Hz,  $\text{CH}_{\text{Naphth}}$ , 1H), 6.78 (s,  $\text{CH}_{\text{cat}}$ , 1H), 6.65 (s,  $\text{CH}_{\text{cat}}$ , 1H), 2.94-3.05 (m,  $2\times\text{CH}(\text{CH}_3)_2$ , 2H), 1.43 (dd,  $^3J_{\text{HP}} = 19.4$  Hz,  $^3J_{\text{HH}} = 7.1$  Hz,  $\text{CH}(\text{CH}_3)$ , 6H), 1.31 (dd,  $^3J_{\text{HP}} = 19.3$  Hz,  $^3J_{\text{HH}} = 7.1$  Hz,  $\text{CH}(\text{CH}_3)$ , 6H).  $^{13}\text{C}\{^1\text{H}\}$  NMR (125.8 MHz,  $\text{CD}_2\text{Cl}_2$ ):  $\delta$  (ppm) 163.3 (d,  $^3J_{\text{CP}} = 5$  Hz,  $\text{OC}_{\text{cat}}$ ), 160.4 (d,  $^3J_{\text{CP}} = 5$  Hz,  $\text{OC}_{\text{cat}}$ ), 147.9 (d,  $^2J_{\text{CP}} = 23$  Hz,  $\text{C}_{\text{q-Naphth}}$ ), 139.5 (s,  $\text{C}_{\text{q-Naphth}}$ ), 134.5 (d,  $^3J_{\text{CP}} = 14$  Hz,  $\text{C}_{\text{q-Naphth}}$ ), 133.7 (d,  $^3J_{\text{CP}} = 3$  Hz,  $\text{CH}_{\text{Naphth}}$ ), 130.9 (d,  $^3J_{\text{CP}} = 3$  Hz,  $\text{CH}_{\text{Naphth}}$ ), 130.2 (d,  $^4J_{\text{CP}} = 1$  Hz,  $\text{CH}_{\text{Naphth}}$ ), 128.7 (s,  $\text{CH}_{\text{Naphth}}$ ), 127.6 (s,  $\text{CH}_{\text{Naphth}}$ ), 127.0 (d,  $^3J_{\text{CP}} = 10$  Hz,  $\text{CH}_{\text{Naphth}}$ ), 124.6 (d,  $^1J_{\text{CP}} = 60$  Hz,  $\text{C}_{\text{q-Naphth}}$ ), 118.9 (s,  $\text{C}_{\text{q-Cat}}$ ), 118.3 (d,  $^5J_{\text{CP}} = 1$  Hz,  $\text{C}_{\text{q-Cat}}$ ), 117.0 (s,  $\text{CH}_{\text{cat}}$ ), 115.7 (d,  $^4J_{\text{CP}} = 7$  Hz,  $\text{CH}_{\text{cat}}$ ), 26.7 (d,  $^1J_{\text{CP}} = 32$  Hz,  $2\times\text{CH}(\text{CH}_3)_2$ ), 17.9 (d,  $^2J_{\text{CP}} = 2$  Hz,  $\text{CH}(\text{CH}_3)_2$ ), 17.8 (s,  $\text{CH}(\text{CH}_3)_2$ ).

$\text{CH}(\text{CH}_3)_2$ .  $^{31}\text{P}$  NMR (202.5 MHz,  $\text{CD}_2\text{Cl}_2$ ):  $\delta$  (ppm) 92.0. HRMS (DCI) calcd. for  $[\text{M}]^+ = \text{C}_{22}\text{H}_{22}\text{O}_2\text{PCl}_2\text{Au}$ : 616.0400, found 616.0425. X-Ray quality crystals were obtained from a dichloromethane solution of **3c** at room temperature.

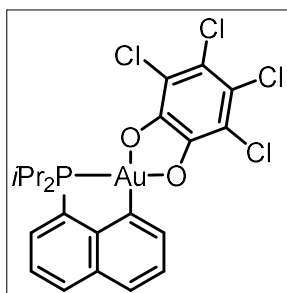

**3d**. Obtained as an orange powder (66 %).  $^1\text{H}$  NMR (500 MHz,  $\text{CD}_2\text{Cl}_2$ ):  $\delta$  (ppm) 8.39 (dd,  $^3J_{\text{HH}} = 7.2$  Hz,  $^4J_{\text{HH}} = 2.1$  Hz,  $\text{CH}_{\text{Naphth}}$ , 1H), 8.10 (dd,  $^3J_{\text{HH}} = 8.3$  Hz,  $^5J_{\text{HP}} = 3.0$  Hz,  $\text{CH}_{\text{Naphth}}$ , 1H), 7.89 (dd,  $^3J_{\text{HH}} = 8.1$  Hz,  $^4J_{\text{HH}} = 2.5$  Hz,  $\text{CH}_{\text{Naphth}}$ , 1H), 7.74-7.77 (m,  $\text{CH}_{\text{Naphth}}$ , 1H), 7.65-7.69 (m,  $\text{CH}_{\text{Naphth}}$ , 1H), 7.60 (t,  $^3J_{\text{HH}} = 7.9$  Hz,  $\text{CH}_{\text{Naphth}}$ , 1H), 3.01-3.08 (m,  $2 \times \text{CH}(\text{CH}_3)_2$ , 2H), 1.48 (dd,  $^3J_{\text{HP}} = 19.6$  Hz,  $^3J_{\text{HH}} = 7.1$  Hz,  $\text{CH}(\text{CH}_3)$ , 6H), 1.34 (dd,  $^3J_{\text{HP}} = 19.6$  Hz,  $^3J_{\text{HH}} = 7.1$  Hz,  $\text{CH}(\text{CH}_3)$ , 6H).  $^{13}\text{C}\{^1\text{H}\}$  NMR (125.8 MHz,  $\text{CD}_2\text{Cl}_2$ ):  $\delta$  (ppm) 159.1 (d,  $^3J_{\text{CP}} = 4$  Hz,  $\text{OC}_{\text{Cat}}$ ), 156.2 (d,  $^3J_{\text{CP}} = 4$  Hz,  $\text{OC}_{\text{Cat}}$ ), 147.8 (d,  $^2J_{\text{CP}} = 22$  Hz,  $\text{C}_{\text{q-Naphth}}$ ), 139.0 (s,  $\text{C}_{\text{q-Naphth}}$ ), 134.6 (d,  $^3J_{\text{CP}} = 14$  Hz,  $\text{C}_{\text{q-Naphth}}$ ), 133.9 (d,  $^3J_{\text{CP}} = 3$  Hz,  $\text{CH}_{\text{Naphth}}$ ), 131.1 (d,  $^3J_{\text{CP}} = 3$  Hz,  $\text{CH}_{\text{Naphth}}$ ), 130.2 (d,  $^4J_{\text{CP}} = 1$  Hz,  $\text{CH}_{\text{Naphth}}$ ), 128.9 (s,  $\text{CH}_{\text{Naphth}}$ ), 127.9 (s,  $\text{CH}_{\text{Naphth}}$ ), 127.1 (d,  $^3J_{\text{CP}} = 11$  Hz,  $\text{CH}_{\text{Naphth}}$ ), 124.1 (d,  $^1J_{\text{CP}} = 59$  Hz,  $\text{C}_{\text{q-Naphth}}$ ), 119.1 (s,  $\text{C}_{\text{q-Cat}}$ ), 118.8 (s,  $\text{C}_{\text{q-Cat}}$ ), 118.6 (s,  $\text{C}_{\text{q-Cat}}$ ), 117.6 (d,  $^4J_{\text{CP}} = 5$  Hz,  $\text{C}_{\text{q-Cat}}$ ), 26.8 (d,  $^1J_{\text{CP}} = 32$  Hz,  $2 \times \text{CH}(\text{CH}_3)_2$ ), 17.9 (d,  $^2J_{\text{CP}} = 2$  Hz,  $\text{CH}(\text{CH}_3)_2$ ), 17.7 (s,  $\text{CH}(\text{CH}_3)_2$ ).  $^{31}\text{P}$  NMR (202.5 MHz,  $\text{CD}_2\text{Cl}_2$ ):  $\delta$  (ppm) 95.6. HRMS (DCI) calcd. for  $[\text{M}]^+ = \text{C}_{22}\text{H}_{20}\text{O}_2\text{PCl}_4\text{Au}$ : 683.9621, found 683.9639. X-Ray quality crystals were obtained from a dichloromethane solution of **3d** at room temperature.

## 6. Preparation of P<sup>^</sup>P catecholate complexes (7a-d)

A mixture of **6** (0.3 mmol) and the corresponding sodium catecholate (**2a-d**) (1.5 equiv., 0.45 mmol) were suspended in MeOH (2 ml) and stirred vigorously for 2 hours at room temperature, under argon atmosphere. After this time, the supernatant was removed by cannula filtration and the precipitate was washed with MeOH (3 x 2 ml). The remaining solid was dried *in vacuo* for 1 hour.

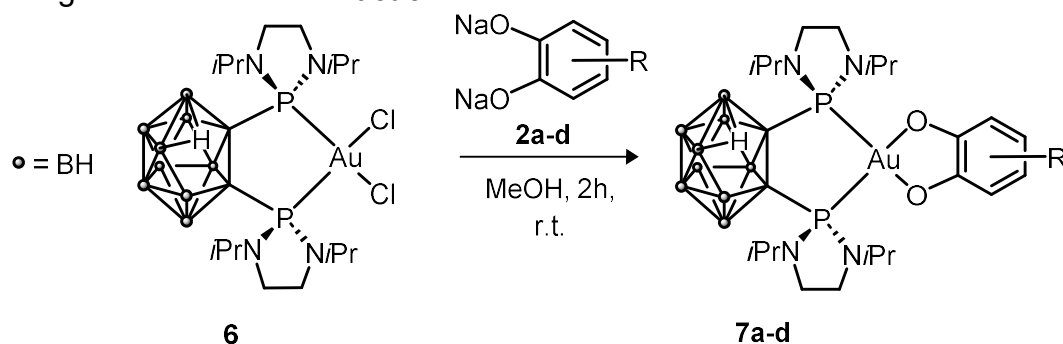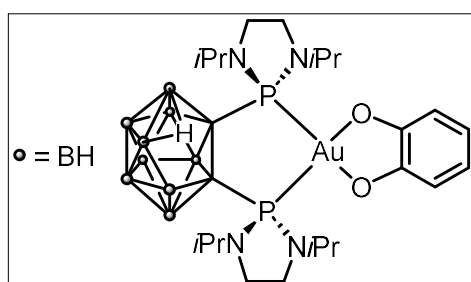

**7a**. Obtained using as a dark brown powder (74 %).  $^1\text{H}$  NMR (500 MHz,  $\text{CD}_2\text{Cl}_2$ ):  $\delta$  (ppm) 6.54 (m,  $\text{CH}_{\text{cat}}$ , 2H), 6.42 (m,  $\text{CH}_{\text{cat}}$ , 2H), 3.65-3.72 (m,  $2 \times \text{CH}(\text{CH}_3)_2$ , 2H), 3.28-3.60 (m,  $2 \times \text{CH}(\text{CH}_3)_2$  &  $2 \times \text{N}(\text{CH}_2)_2\text{N}$ , 10H), 1.46 (d,  $^3J_{\text{HH}} = 6.6$  Hz,  $\text{CH}(\text{CH}_3)_2$ , 6H), 1.35 (d,  $^3J_{\text{HH}} = 6.6$  Hz,  $2 \times \text{CH}(\text{CH}_3)_2$ , 12H), 1.32 (d,  $^3J_{\text{HH}} = 6.6$  Hz,  $\text{CH}(\text{CH}_3)_2$ , 6H), 0.91-3.00 (bs,  $\sim 9\text{H}$ , BH), -2.71 (bs, BHB, 1H).  $^{13}\text{C}\{^1\text{H}\}$

**NMR** (125.8 MHz, CD<sub>2</sub>Cl<sub>2</sub>): δ (ppm) 160.1 (dd, <sup>3</sup>J<sub>CP</sub> = 7 Hz, <sup>3</sup>J<sub>CP</sub> = 5 Hz, 2xO-C<sub>cat</sub>), 117.7 (s, 2xCH<sub>cat</sub>), 116.8 (d, <sup>4</sup>J<sub>CP</sub> = 4 Hz, 2xCH<sub>cat</sub>), 57.9 (d, <sup>1</sup>J<sub>CP</sub> = 48 Hz, 2xC<sub>carborane</sub>), 48.7 (d, <sup>3</sup>J<sub>CP</sub> = 8 Hz, 2xCH(CH<sub>3</sub>)<sub>2</sub>), 47.2 (d, <sup>3</sup>J<sub>CP</sub> = 8 Hz, 2xCH(CH<sub>3</sub>)<sub>2</sub>), 41.7 (d, <sup>2</sup>J<sub>CP</sub> = 6 Hz, 2xN(CH<sub>2</sub>CH<sub>2</sub>)N), 41.3 (d, <sup>2</sup>J<sub>CP</sub> = 7 Hz, 2xN(CH<sub>2</sub>CH<sub>2</sub>)N), 21.4 (s, CH(CH<sub>3</sub>)<sub>2</sub>), 21.3 (d, <sup>3</sup>J<sub>CP</sub> = 7 Hz, CH(CH<sub>3</sub>)<sub>2</sub>), 20.9 (d, <sup>3</sup>J<sub>CP</sub> = 7 Hz, CH(CH<sub>3</sub>)<sub>2</sub>), 20.4 (s, CH(CH<sub>3</sub>)<sub>2</sub>). **<sup>31</sup>P NMR** (202.5 MHz, CD<sub>2</sub>Cl<sub>2</sub>): δ (ppm) 107.1 (s). **<sup>11</sup>B NMR** (160.5 MHz, CD<sub>2</sub>Cl<sub>2</sub>): δ (ppm) -8.6 (s), -15.2 (s), -19.9 (s), -26.9 (s), -32.8 (s). **HRMS** (ESI) calcd. for [M-H]<sup>-</sup> = C<sub>24</sub>H<sub>49</sub>AuB<sub>9</sub>N<sub>4</sub>O<sub>2</sub>P<sub>2</sub>: 782.3898, found 782.3887. X-Ray quality crystals were obtained by cooling down (4 °C) a saturated solution of **7a** in dichloromethane.

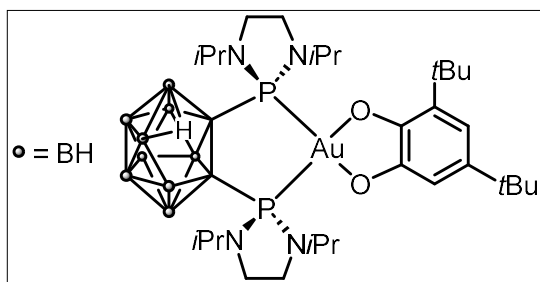

**7b**. Obtained as a dark brown powder (72 %).

**<sup>1</sup>H NMR** (500 MHz, CD<sub>2</sub>Cl<sub>2</sub>): δ (ppm) 6.52-5.54 (m, 2xCH<sub>cat</sub>, 2H), 3.65-3.79 (m, 2xCH(CH<sub>3</sub>)<sub>2</sub>, 2H), 3.29-3.59 (m, 2xCH(CH<sub>3</sub>)<sub>2</sub> & 2xN(CH<sub>2</sub>)<sub>2</sub>N, 10H), 1.47 (d, <sup>3</sup>J<sub>HH</sub> = 6.6 Hz, CH(CH<sub>3</sub>)<sub>2</sub>, 3H), 1.45 (d, <sup>3</sup>J<sub>HH</sub> = 6.6 Hz, CH(CH<sub>3</sub>)<sub>2</sub>, 3H), 1.31-1.38 (m, 3xCH(CH<sub>3</sub>)<sub>2</sub> & C(CH<sub>3</sub>)<sub>3</sub>, 27H), 1.25 (s, C(CH<sub>3</sub>)<sub>3</sub>, 9H), 0.91-3.01

(bs, ~9H, BH), -2.66 (bs, BHB, 1H). **<sup>13</sup>C{<sup>1</sup>H} NMR** (125.8 MHz, CD<sub>2</sub>Cl<sub>2</sub>): δ (ppm) 159.6 (dd, <sup>3</sup>J<sub>CP</sub> = 6 Hz, <sup>3</sup>J<sub>CP</sub> = 4 Hz, O-C<sub>cat</sub>), 155.5 (dd, <sup>3</sup>J<sub>CP</sub> = 6 Hz, <sup>3</sup>J<sub>CP</sub> = 4 Hz, O-C<sub>cat</sub>), 139.8 (d, <sup>5</sup>J<sub>CP</sub> = 1 Hz, C<sub>q-cat</sub>), 136.5 (d, <sup>4</sup>J<sub>CP</sub> = 4 Hz, C<sub>q-cat</sub>), 112.6 (d, <sup>4</sup>J<sub>CP</sub> = 1 Hz, CH<sub>cat</sub>), 112.3 (s, CH<sub>cat</sub>), 58.9 (d, <sup>1</sup>J<sub>CP</sub> = 48 Hz, C<sub>carborane</sub>), 56.5 (d, <sup>1</sup>J<sub>CP</sub> = 48 Hz, C<sub>carborane</sub>), 48.9 (d, <sup>3</sup>J<sub>CP</sub> = 9 Hz, CH(CH<sub>3</sub>)<sub>2</sub>), 47.7 (d, <sup>2</sup>J<sub>CP</sub> = 8 Hz, CH(CH<sub>3</sub>)<sub>2</sub>), 47.2 (d, <sup>2</sup>J<sub>CP</sub> = 9 Hz, N(CH<sub>2</sub>CH<sub>2</sub>)N), 47.1 (d, <sup>2</sup>J<sub>CP</sub> = 9 Hz, N(CH<sub>2</sub>CH<sub>2</sub>)N), 41.7 (d, <sup>2</sup>J<sub>CP</sub> = 6 Hz, 2xN(CH<sub>2</sub>CH<sub>2</sub>)N), 41.5 (d, <sup>2</sup>J<sub>CP</sub> = 8 Hz, CH(CH<sub>3</sub>)<sub>2</sub>), 40.9 (d, <sup>2</sup>J<sub>CP</sub> = 8 Hz, CH(CH<sub>3</sub>)<sub>2</sub>), 35.0 (s, C(CH<sub>3</sub>)<sub>3</sub>), 34.2 (s, C(CH<sub>3</sub>)<sub>3</sub>), 32.2 (s, C(CH<sub>3</sub>)<sub>3</sub>), 30.3 (s, C(CH<sub>3</sub>)<sub>3</sub>), 21.9 (s, CH(CH<sub>3</sub>)<sub>2</sub>), 21.4 (s, CH(CH<sub>3</sub>)<sub>2</sub>), 21.3 (d, <sup>3</sup>J<sub>CP</sub> = 7 Hz, CH(CH<sub>3</sub>)<sub>2</sub>), 21.2 (d, <sup>3</sup>J<sub>CP</sub> = 7 Hz, CH(CH<sub>3</sub>)<sub>2</sub>), 21.1 (d, <sup>3</sup>J<sub>CP</sub> = 8 Hz, CH(CH<sub>3</sub>)<sub>2</sub>), 21.2 (s, CH(CH<sub>3</sub>)<sub>2</sub>), 20.7 (d, <sup>3</sup>J<sub>CP</sub> = 7 Hz, CH(CH<sub>3</sub>)<sub>2</sub>), 20.5 (s, CH(CH<sub>3</sub>)<sub>2</sub>). **<sup>31</sup>P NMR** (202.5 MHz, CD<sub>2</sub>Cl<sub>2</sub>): δ (ppm) 107.4 (s), 104.9 (s). **<sup>11</sup>B NMR** (160.5 MHz, CD<sub>2</sub>Cl<sub>2</sub>): δ (ppm) -8.2 (s), -14.0 (s), -16.3 (s), -19.6 (s), -27.1 (s), -32.7 (s). **HRMS** (ESI) calcd. for [M-H]<sup>-</sup> = C<sub>32</sub>H<sub>65</sub>AuB<sub>9</sub>N<sub>4</sub>O<sub>2</sub>P<sub>2</sub>: 894.5151, found 894.5144. X-Ray quality crystals were obtained by cooling down (4 °C) a saturated solution of **7b** in dichloromethane.

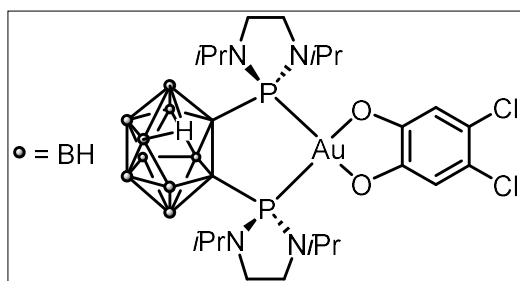

**7c**. Obtained as an orange powder (69 %).

**<sup>1</sup>H NMR** (500 MHz, CD<sub>2</sub>Cl<sub>2</sub>): δ (ppm) 6.60 (s, CH<sub>cat</sub>, 2H), 3.65-3.72 (m, 2xCH(CH<sub>3</sub>)<sub>2</sub>, 2H), 3.30-3.57 (m, 2xCH(CH<sub>3</sub>)<sub>2</sub> & 2xN(CH<sub>2</sub>)<sub>2</sub>N, 10H), 1.45 (d, <sup>3</sup>J<sub>HH</sub> = 6.5 Hz, CH(CH<sub>3</sub>)<sub>2</sub>, 6H), 1.32 (m, 3xCH(CH<sub>3</sub>)<sub>2</sub>, 18H), 0.91-3.00 (bs, ~9H, BH), -2.73 (bs, BHB, 1H). **<sup>13</sup>C{<sup>1</sup>H} NMR** (125.8 MHz, CD<sub>2</sub>Cl<sub>2</sub>): δ (ppm) 161.1 (dd, <sup>3</sup>J<sub>CP</sub> = 7 Hz,

<sup>3</sup>J<sub>CP</sub> = 4 Hz, 2xO-C<sub>cat</sub>), 119.8 (s, 2xC-Cl<sub>cat</sub>), 117.5 (s, d, <sup>3</sup>J<sub>CP</sub> = 4 Hz, 2xCH<sub>cat</sub>), 58.3 (bs, 2xC<sub>carborane</sub>), 49.7 (d, <sup>3</sup>J<sub>CP</sub> = 7 Hz, 2xCH(CH<sub>3</sub>)<sub>2</sub>), 48.2 (d, <sup>3</sup>J<sub>CP</sub> = 7 Hz, 2xCH(CH<sub>3</sub>)<sub>2</sub>), 42.8 (d, <sup>2</sup>J<sub>CP</sub> = 6 Hz, 2xN(CH<sub>2</sub>CH<sub>2</sub>)N), 42.3 (d, <sup>2</sup>J<sub>CP</sub> = 7 Hz, 2xN(CH<sub>2</sub>CH<sub>2</sub>)N), 22.3 (s, CH(CH<sub>3</sub>)<sub>2</sub>), 22.2 (d, <sup>3</sup>J<sub>CP</sub> = 6 Hz, CH(CH<sub>3</sub>)<sub>2</sub>), 21.8 (d, <sup>3</sup>J<sub>CP</sub> = 7 Hz, CH(CH<sub>3</sub>)<sub>2</sub>), 21.3 (s, CH(CH<sub>3</sub>)<sub>2</sub>). **<sup>31</sup>P NMR** (202.5 MHz, CD<sub>2</sub>Cl<sub>2</sub>): δ (ppm) 106.7 (s). **<sup>11</sup>B NMR** (160.5 MHz,

CD<sub>2</sub>Cl<sub>2</sub>): δ (ppm) -8.6 (s), -15.1 (s), -19.9 (s), -26.8 (s), -32.7 (s). **HRMS** (ESI) calcd. for [M-H]<sup>-</sup> = C<sub>24</sub>H<sub>47</sub>AuB<sub>9</sub>Cl<sub>2</sub>N<sub>4</sub>O<sub>2</sub>P<sub>2</sub>: 852.3093, found 852.3084.

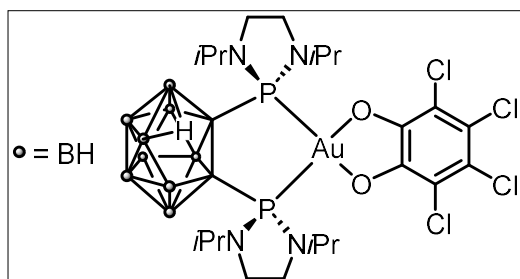

**7d**. Obtained as an orange powder (80 %). **<sup>1</sup>H NMR** (500 MHz, CD<sub>2</sub>Cl<sub>2</sub>): δ (ppm) 3.60-3.78 (m, 2xCH(CH<sub>3</sub>)<sub>2</sub> & 2xN(CH<sub>2</sub>)<sub>2</sub>N, 6H), 3.38-3.49 (m, 2xCH(CH<sub>3</sub>)<sub>2</sub> & 2xN(CH<sub>2</sub>)<sub>2</sub>N, 6H), 1.50 (d, <sup>3</sup>J<sub>HH</sub> = 6.5 Hz, CH(CH<sub>3</sub>)<sub>2</sub>, 6H), 1.36 (d, <sup>3</sup>J<sub>HH</sub> = 6.7 Hz, 2xCH(CH<sub>3</sub>)<sub>2</sub>, 12H), 1.35 (d, <sup>3</sup>J<sub>HH</sub> = 6.7 Hz, CH(CH<sub>3</sub>)<sub>2</sub>, 6H), 0.91-3.00 (bs, ~9H, BH), -2.67 (bs, BHB, 1H). **<sup>13</sup>C{<sup>1</sup>H} NMR** (125.8 MHz,

CD<sub>2</sub>Cl<sub>2</sub>): δ (ppm) 155.8 (dd, <sup>3</sup>J<sub>CP</sub> = 7Hz, <sup>3</sup>J<sub>CP</sub> = 5Hz, 2xO-C<sub>cat</sub>), 119.0 (s, 2xCH-cat), 118.9 (s, 2xCH-cat), 56.4 (bs, 2xC<sub>carborane</sub>), 48.7 (d, <sup>3</sup>J<sub>CP</sub> = 8 Hz, 2xCH(CH<sub>3</sub>)<sub>2</sub>), 47.4 (d, <sup>3</sup>J<sub>CP</sub> = 8 Hz, 2xCH(CH<sub>3</sub>)<sub>2</sub>), 41.9 (d, <sup>2</sup>J<sub>CP</sub> = 6 Hz, 2xN(CH<sub>2</sub>CH<sub>2</sub>)N), 41.2 (d, <sup>2</sup>J<sub>CP</sub> = 7 Hz, 2xN(CH<sub>2</sub>CH<sub>2</sub>)N), 21.5 (s, CH(CH<sub>3</sub>)<sub>2</sub>), 21.3 (d, <sup>3</sup>J<sub>CP</sub> = 7 Hz, CH(CH<sub>3</sub>)<sub>2</sub>), 20.9 (d, <sup>3</sup>J<sub>CP</sub> = 7 Hz, CH(CH<sub>3</sub>)<sub>2</sub>), 20.4 (s, CH(CH<sub>3</sub>)<sub>2</sub>). **<sup>31</sup>P NMR** (202.5 MHz, CD<sub>2</sub>Cl<sub>2</sub>): δ (ppm) 106.2 (s). **<sup>11</sup>B NMR** (160.5 MHz, CD<sub>2</sub>Cl<sub>2</sub>): δ (ppm) -8.3 (s), -14.9 (s), -20.2 (s), -26.6 (s), -32.6 (s). **HRMS** (ESI) calcd. for [M-H]<sup>-</sup> = C<sub>24</sub>H<sub>45</sub>AuB<sub>9</sub>Cl<sub>4</sub>N<sub>4</sub>O<sub>2</sub>P<sub>2</sub>: 920.2301, found 920.2307.



## 7. NMR spectra

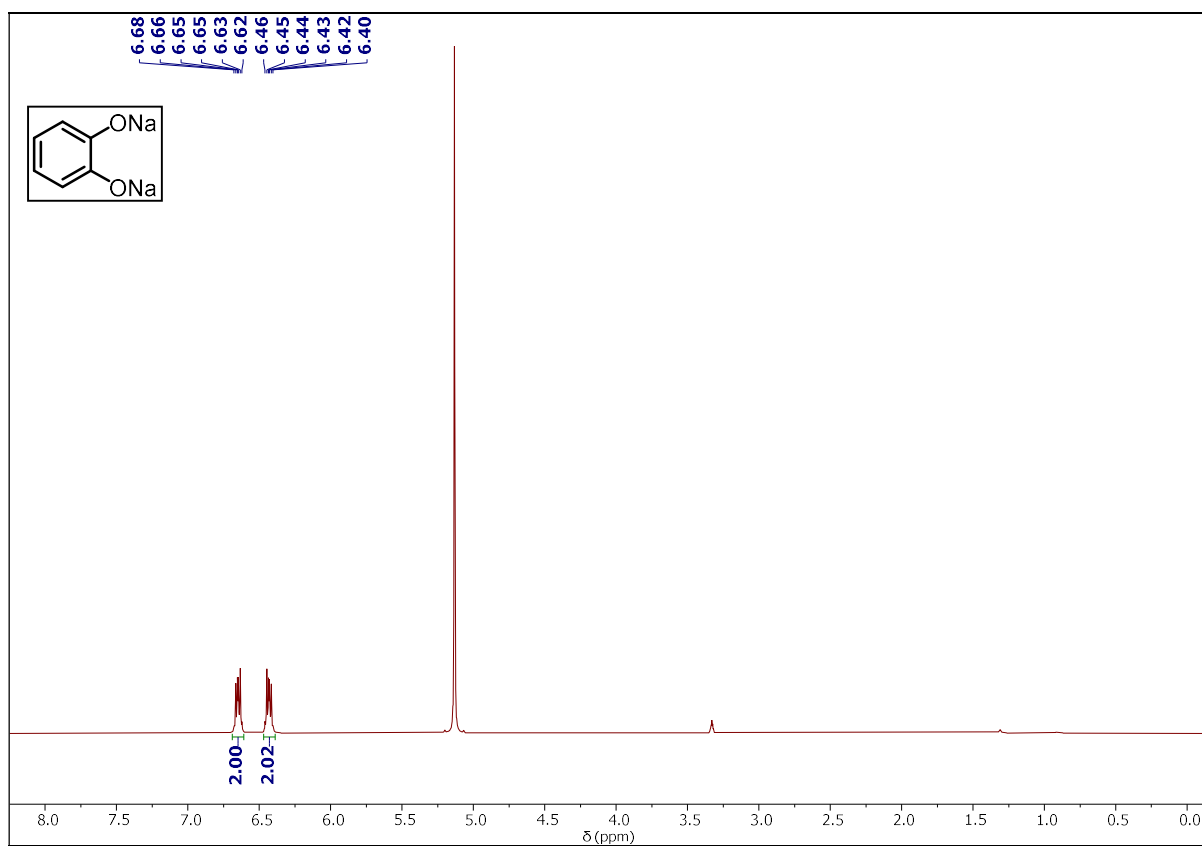

Figure S1.  $^1\text{H}$  NMR spectrum of **2a** in MeOD.

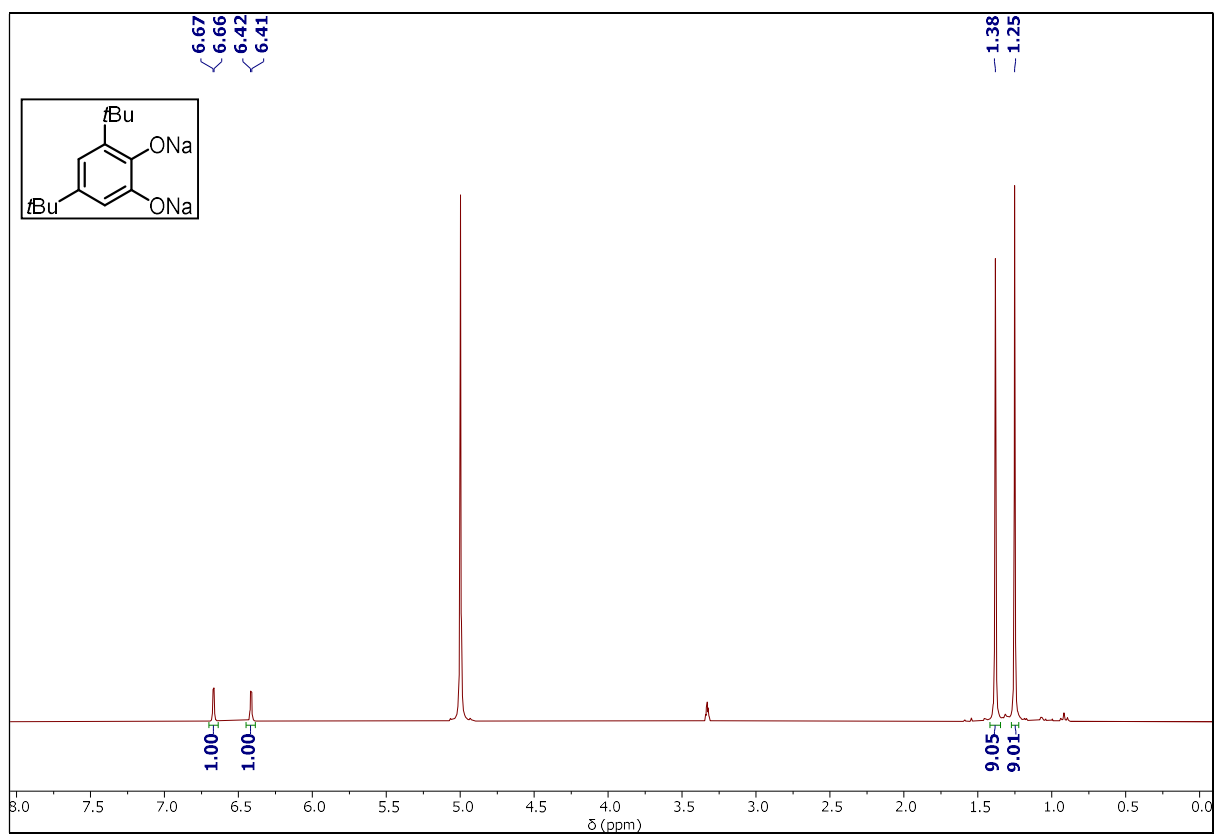

Figure S2.  $^1\text{H}$  NMR spectrum of **2b** in MeOD.

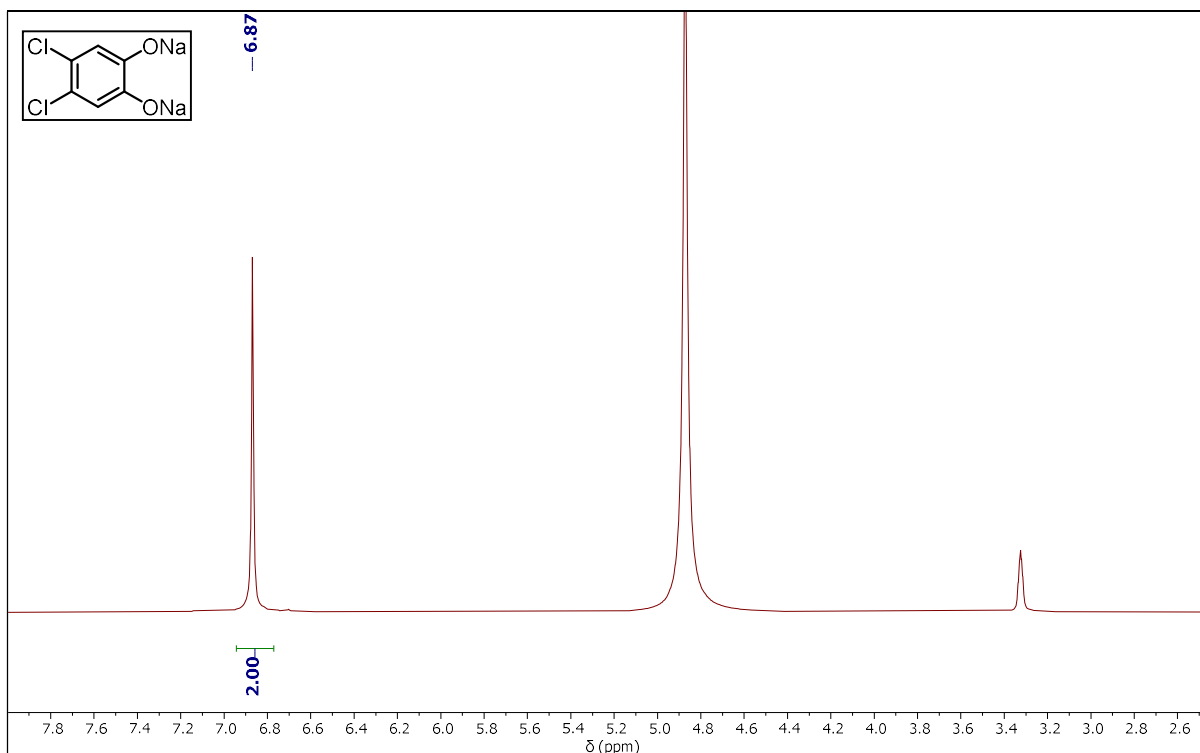

Figure S3.  $^1\text{H}$  NMR spectrum of **2c** in MeOD.

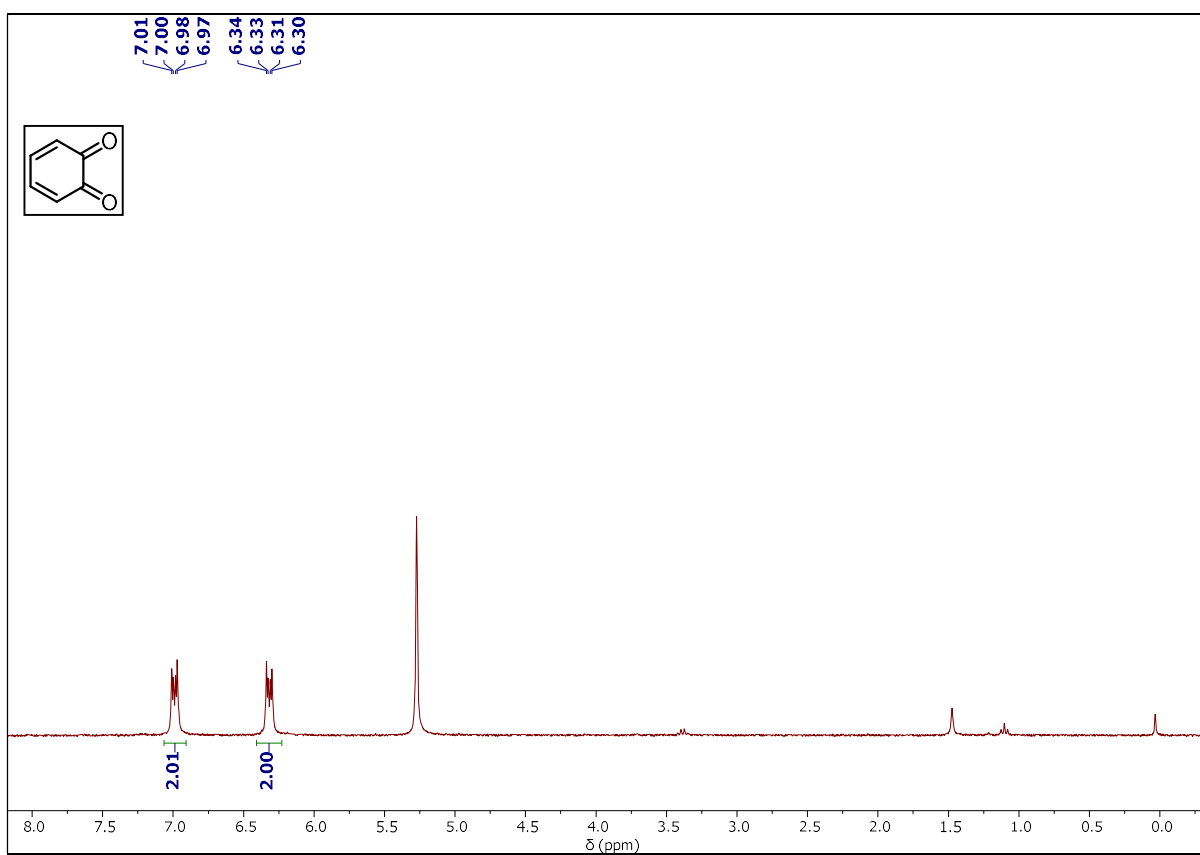

Figure S4.  $^1\text{H}$  NMR spectrum of **4a** in  $\text{CD}_2\text{Cl}_2$ .

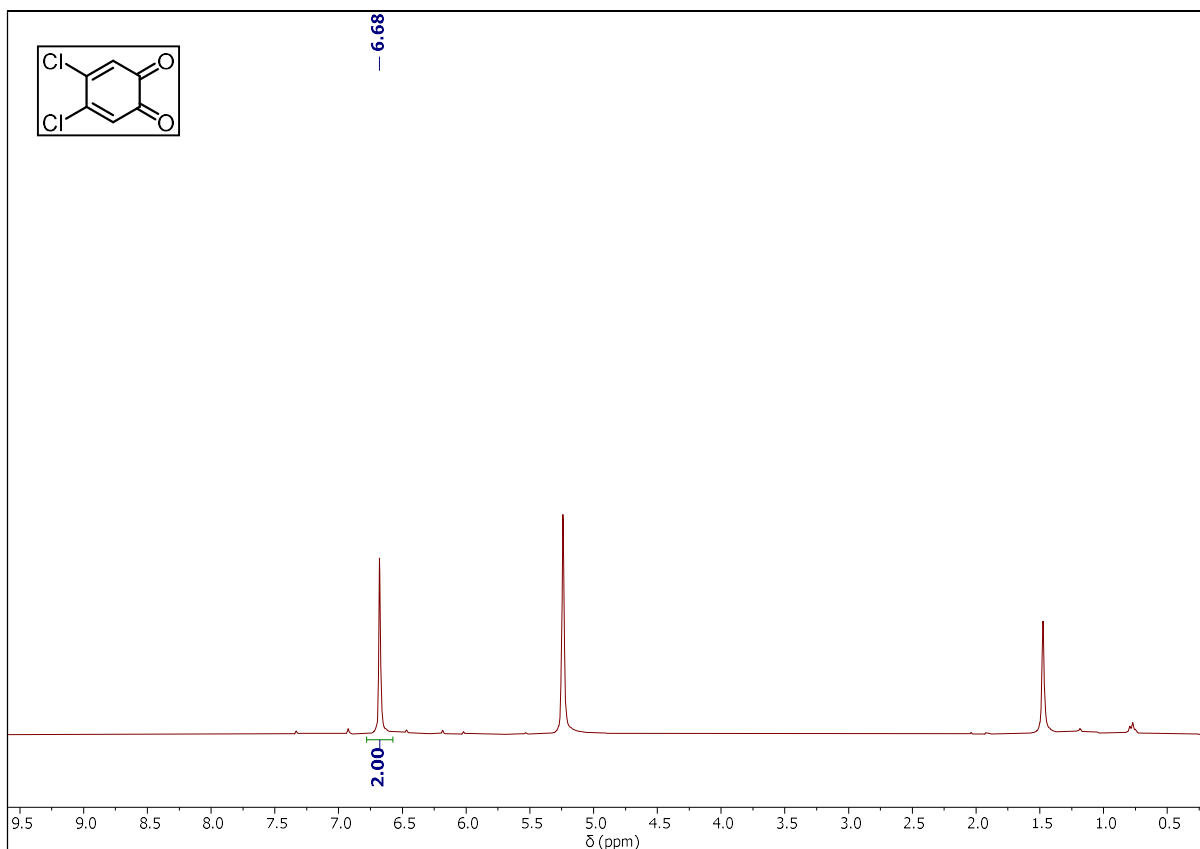

Figure S5.  $^1\text{H}$  NMR spectrum of **4c** in  $\text{CD}_2\text{Cl}_2$ .

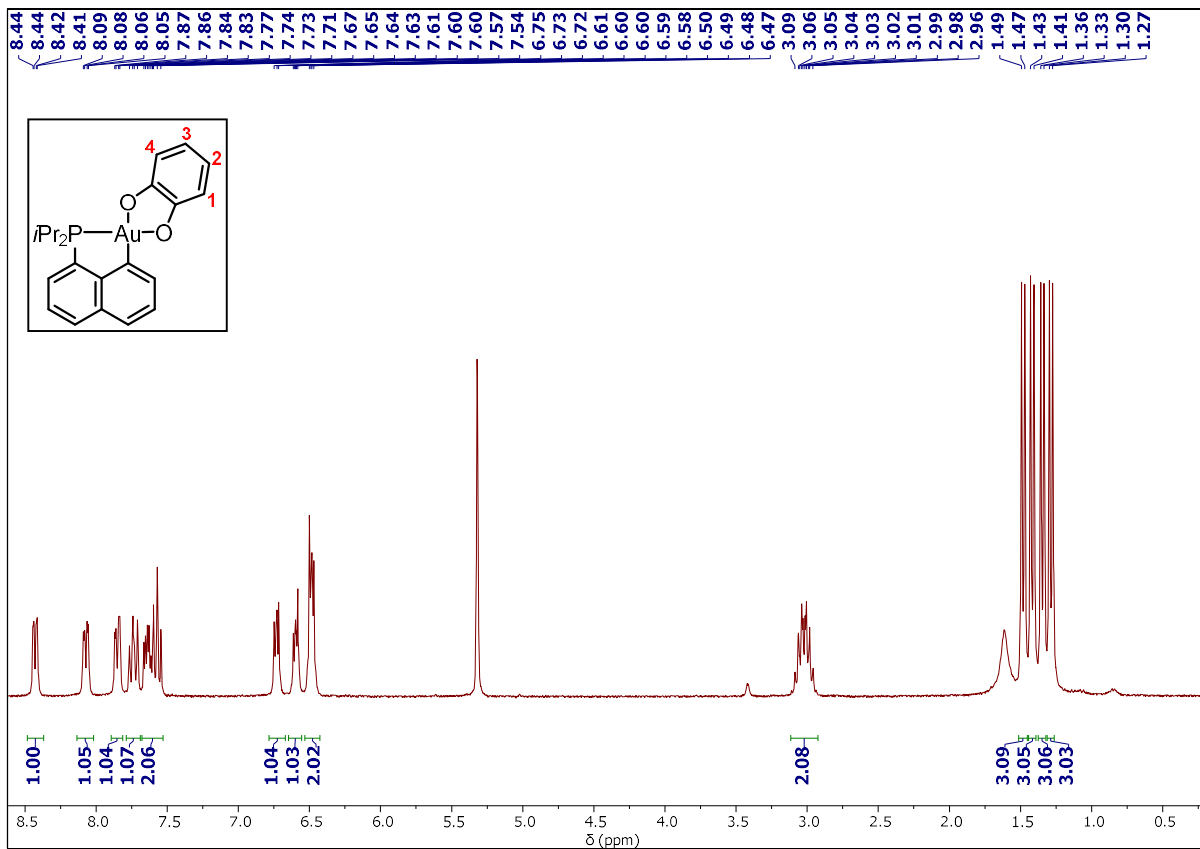

Figure S6.  $^1\text{H}$  NMR spectrum of **3a** in  $\text{CD}_2\text{Cl}_2$ .

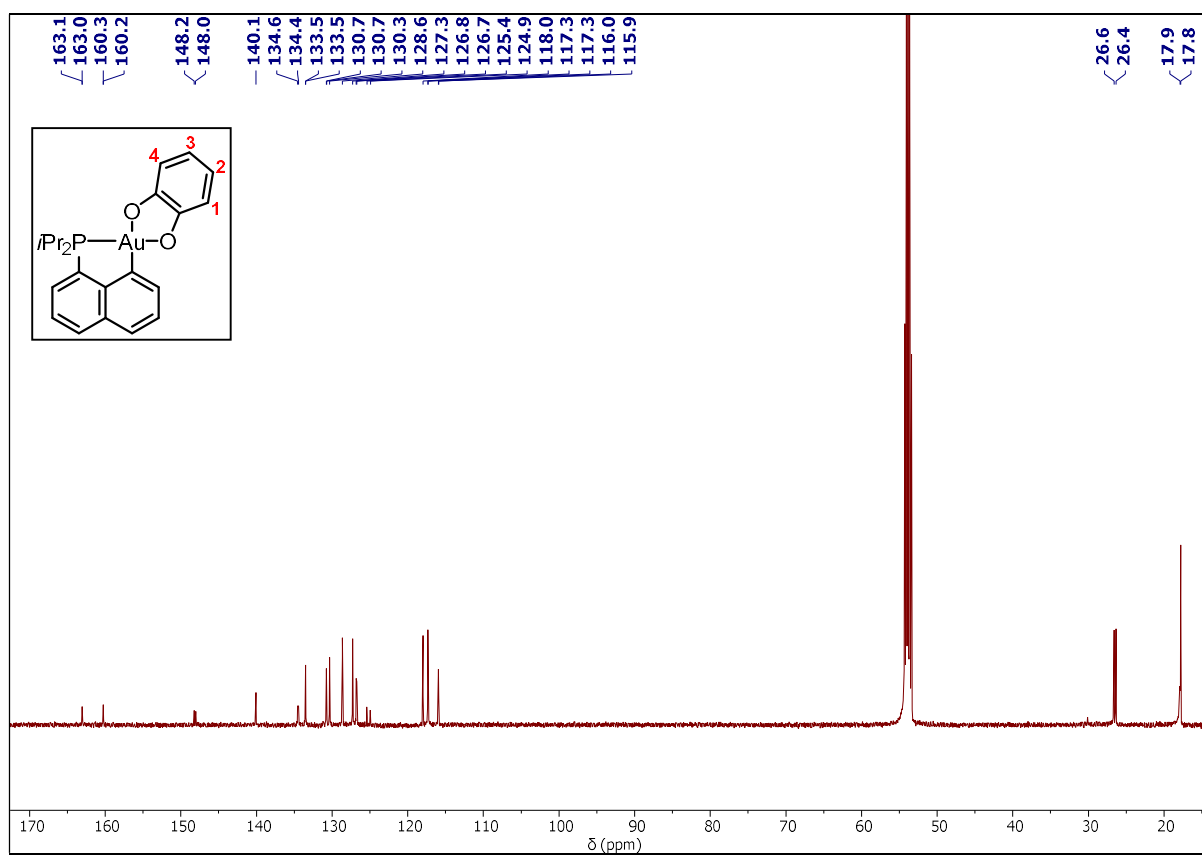

**Figure S7.**  $^{13}\text{C}\{^1\text{H}\}$  NMR spectrum of **3a** in  $\text{CD}_2\text{Cl}_2$ .

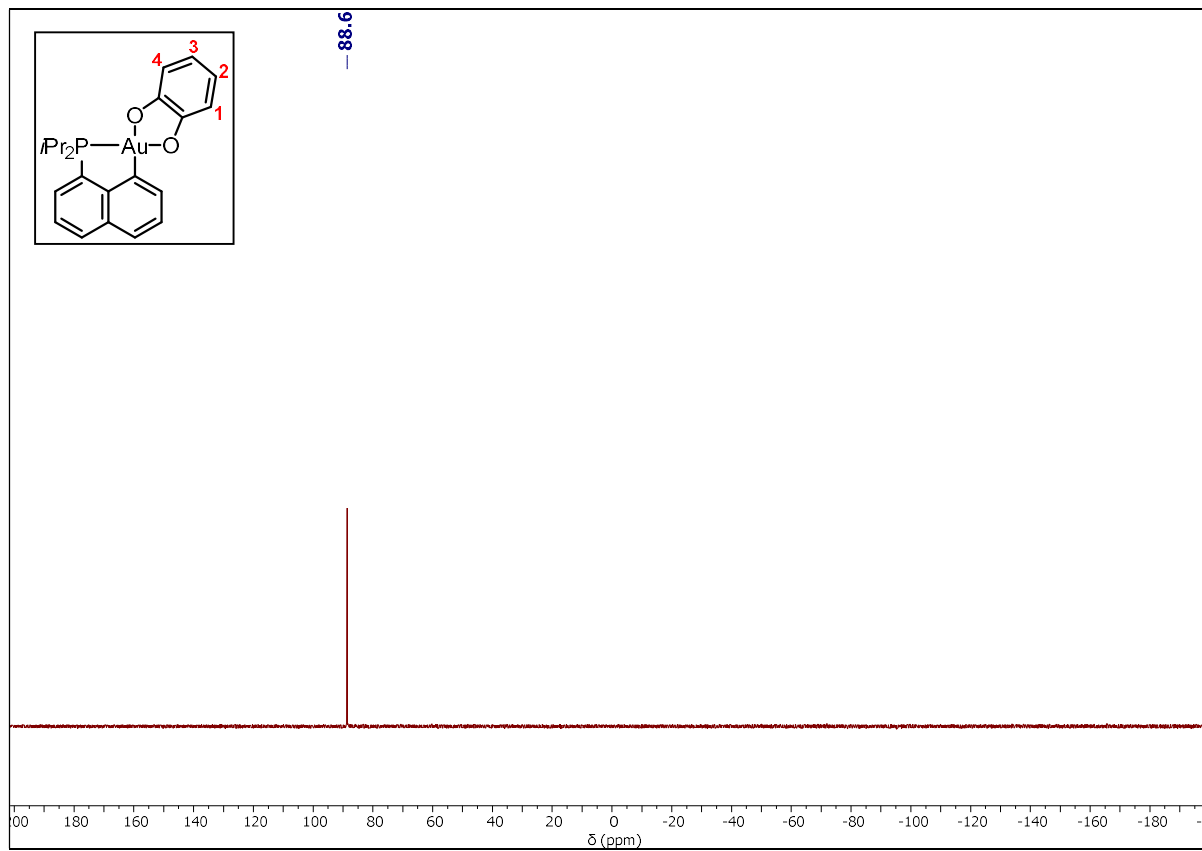

**Figure S8.**  $^{31}\text{P}$  NMR spectrum of **3a** in  $\text{CD}_2\text{Cl}_2$ .

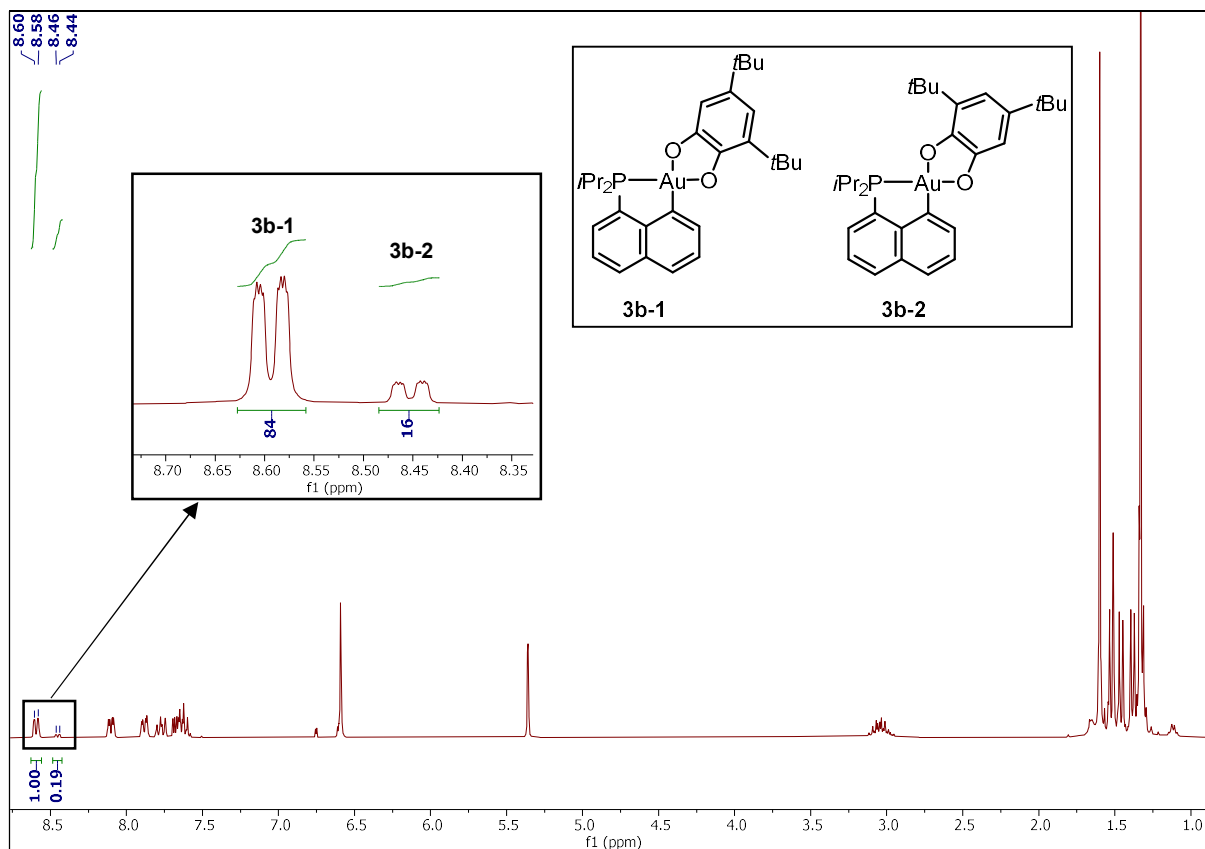

**Figure S9.**  $^1\text{H}$  NMR spectrum of the mixture of **3b-1** and **3b-2** in  $\text{CD}_2\text{Cl}_2$ .

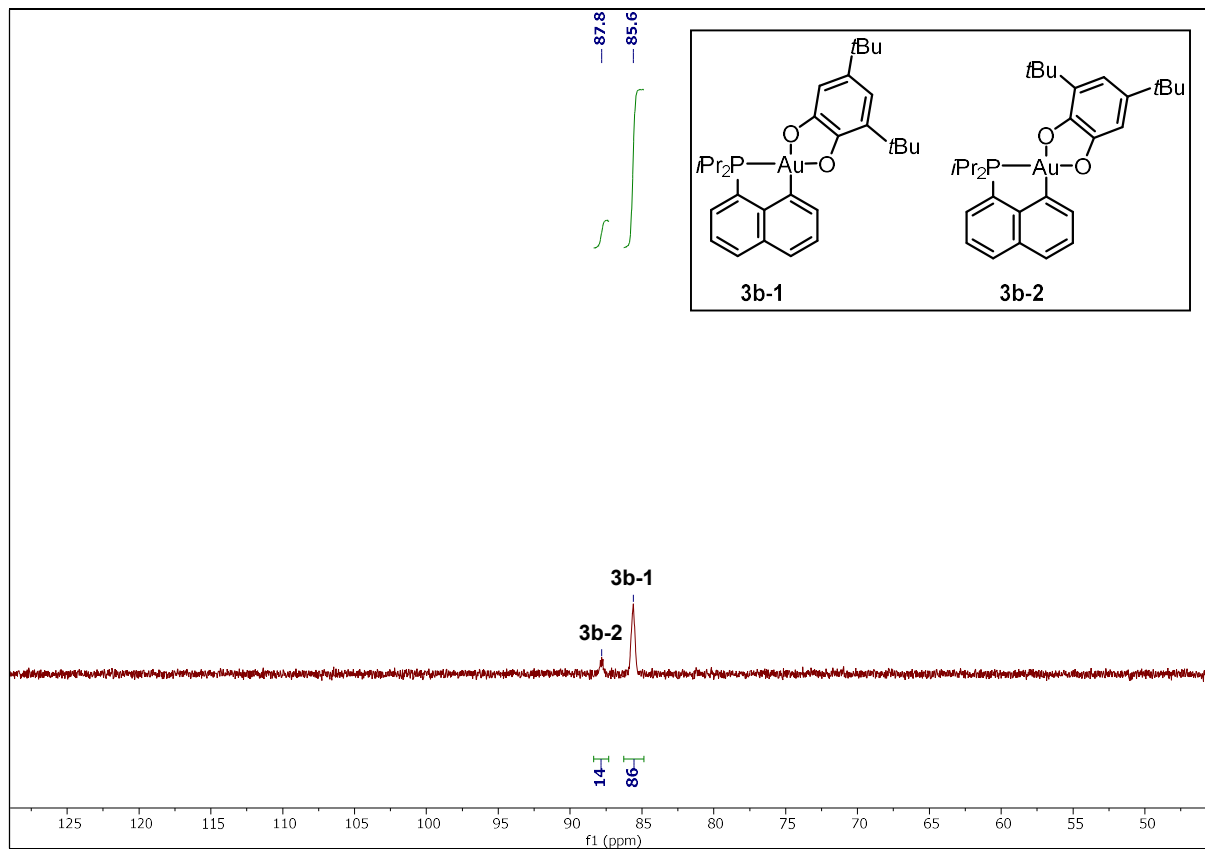

**Figure S10.**  $^{31}\text{P}$  NMR spectrum of the mixture of **3b-1** and **3b-2** in  $\text{CD}_2\text{Cl}_2$ .

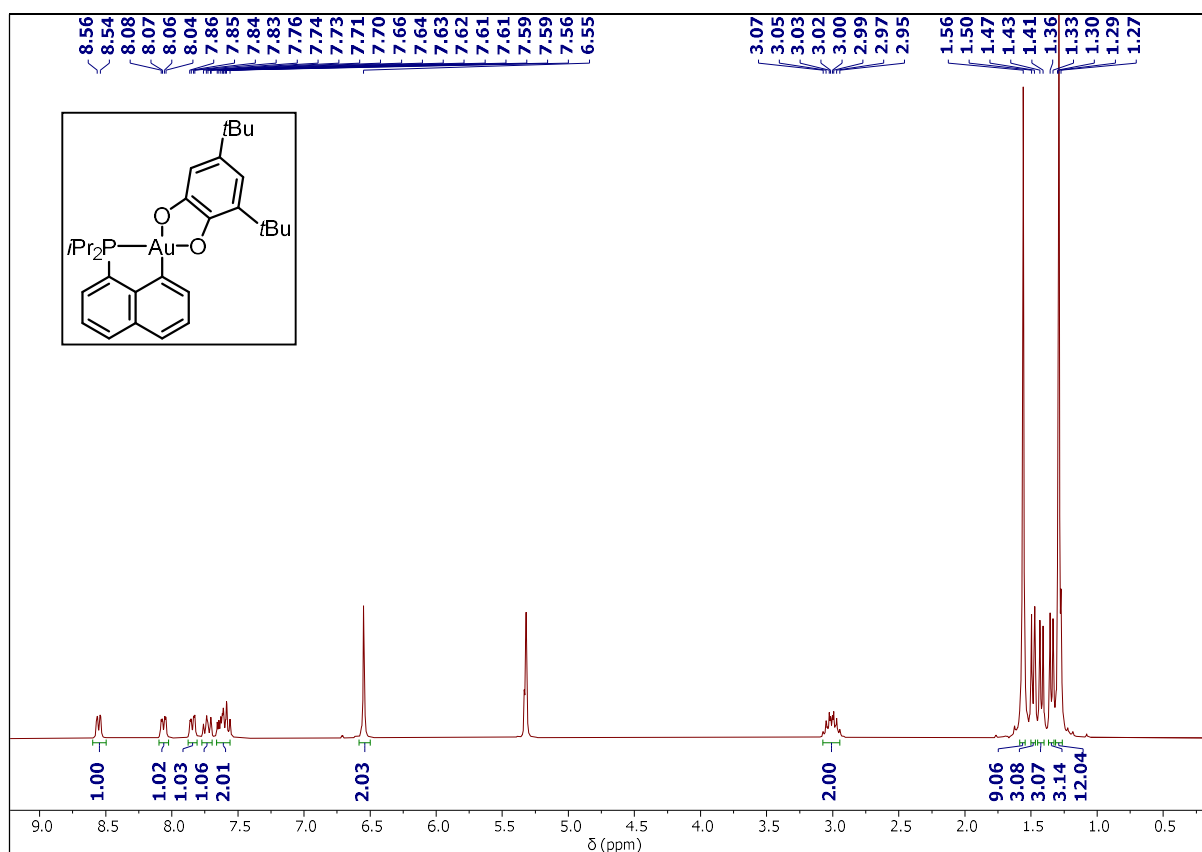

Figure S11. <sup>1</sup>H NMR spectrum of **3b-1** in CD<sub>2</sub>Cl<sub>2</sub>.

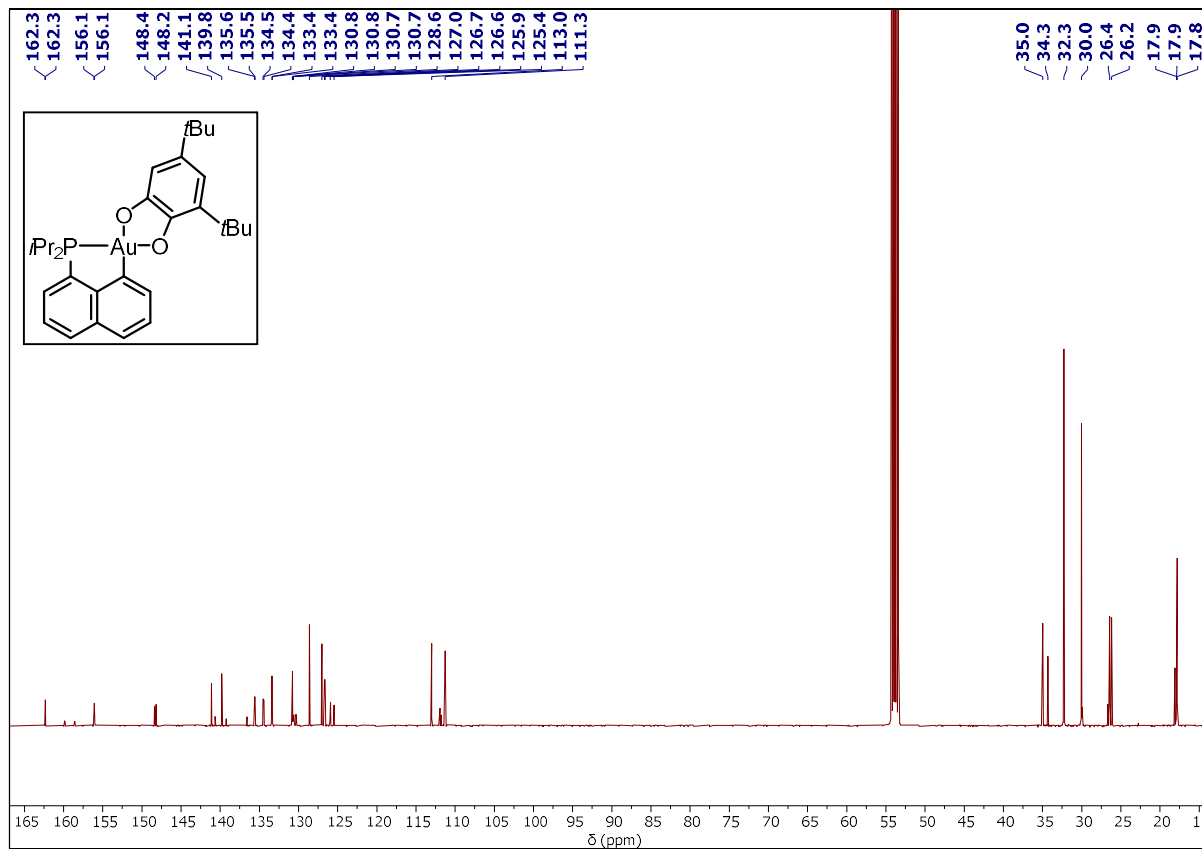

Figure S12. <sup>13</sup>C{<sup>1</sup>H} NMR spectrum of **3b-1** in CD<sub>2</sub>Cl<sub>2</sub>.

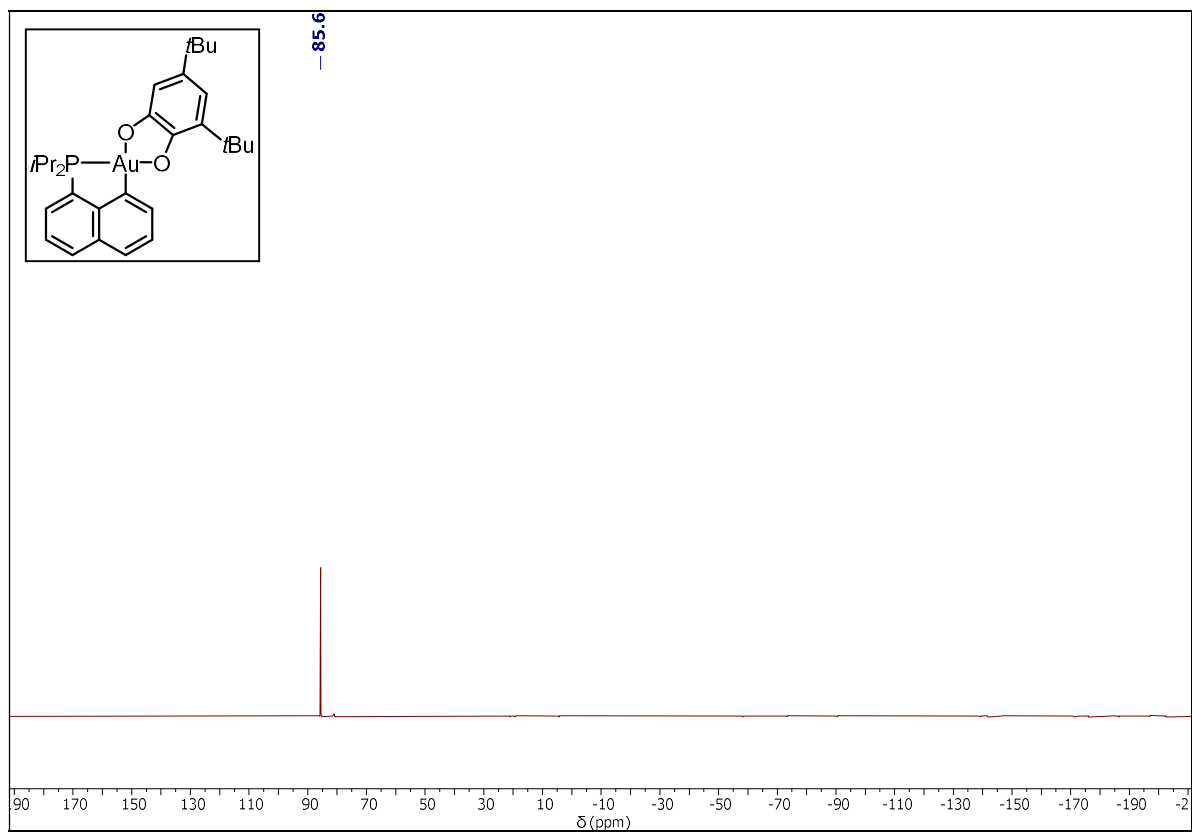

**Figure S13.**  $^{31}\text{P}$  NMR spectrum of **3b-1** in  $\text{CD}_2\text{Cl}_2$ .

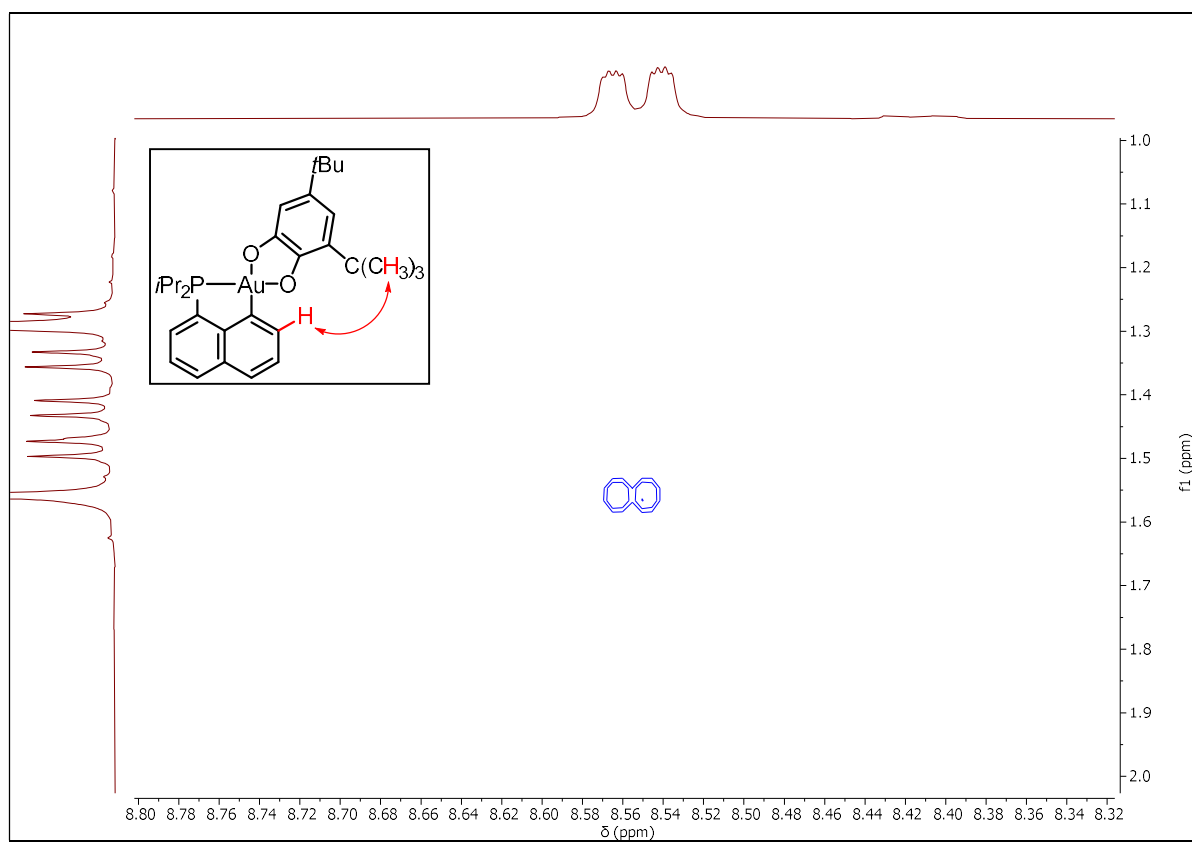

**Figure S14.**  $^1\text{H}$ - $^1\text{H}$  NOESY NMR of **3b-1** in  $\text{CD}_2\text{Cl}_2$  highlighting the  $o\text{-CH-tBu}$  NOE signal.

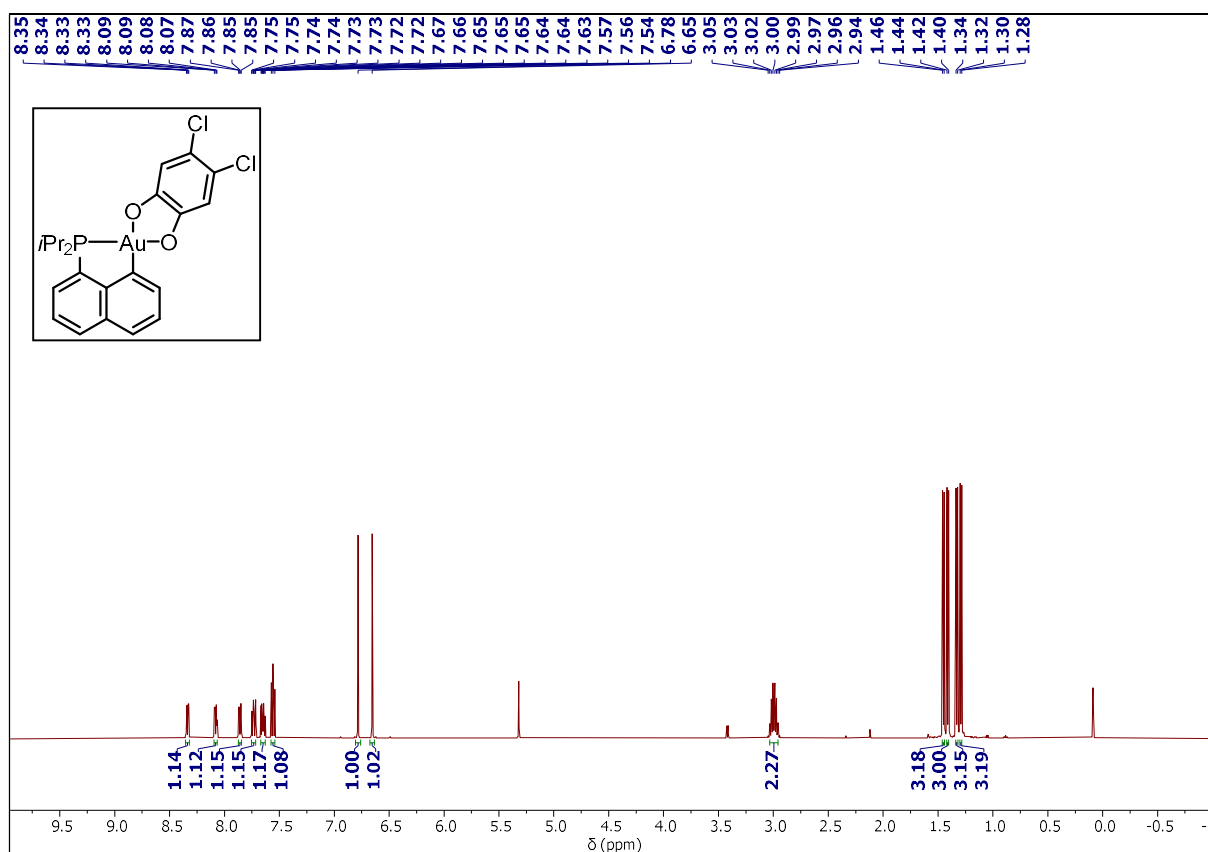

Figure S15.  $^1\text{H}$  NMR spectrum of **3c** in  $\text{CD}_2\text{Cl}_2$ .

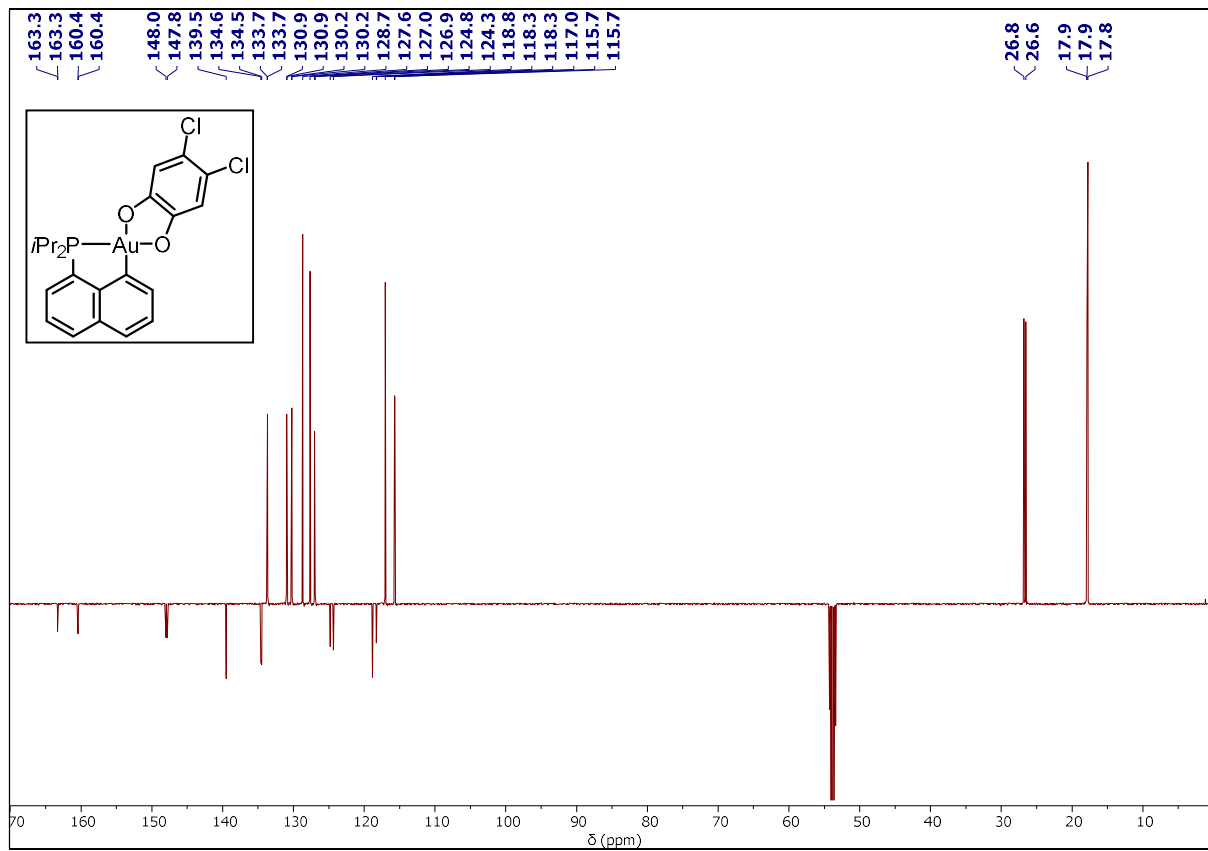

Figure S16.  $^{13}\text{C}\{^1\text{H}\}$  NMR spectrum of **3c** in  $\text{CD}_2\text{Cl}_2$ .



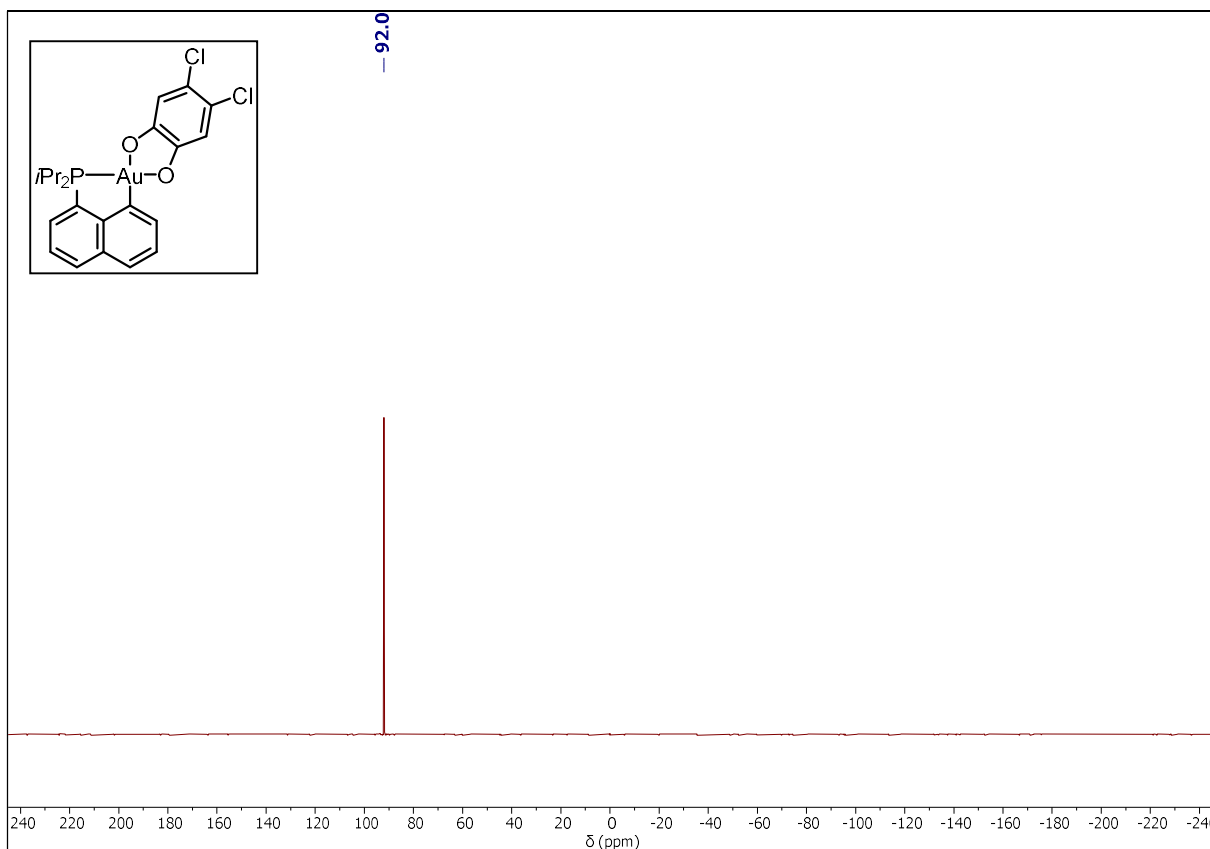

Figure S17.  $^{31}\text{P}$  NMR spectrum of **3c** in  $\text{CD}_2\text{Cl}_2$ .

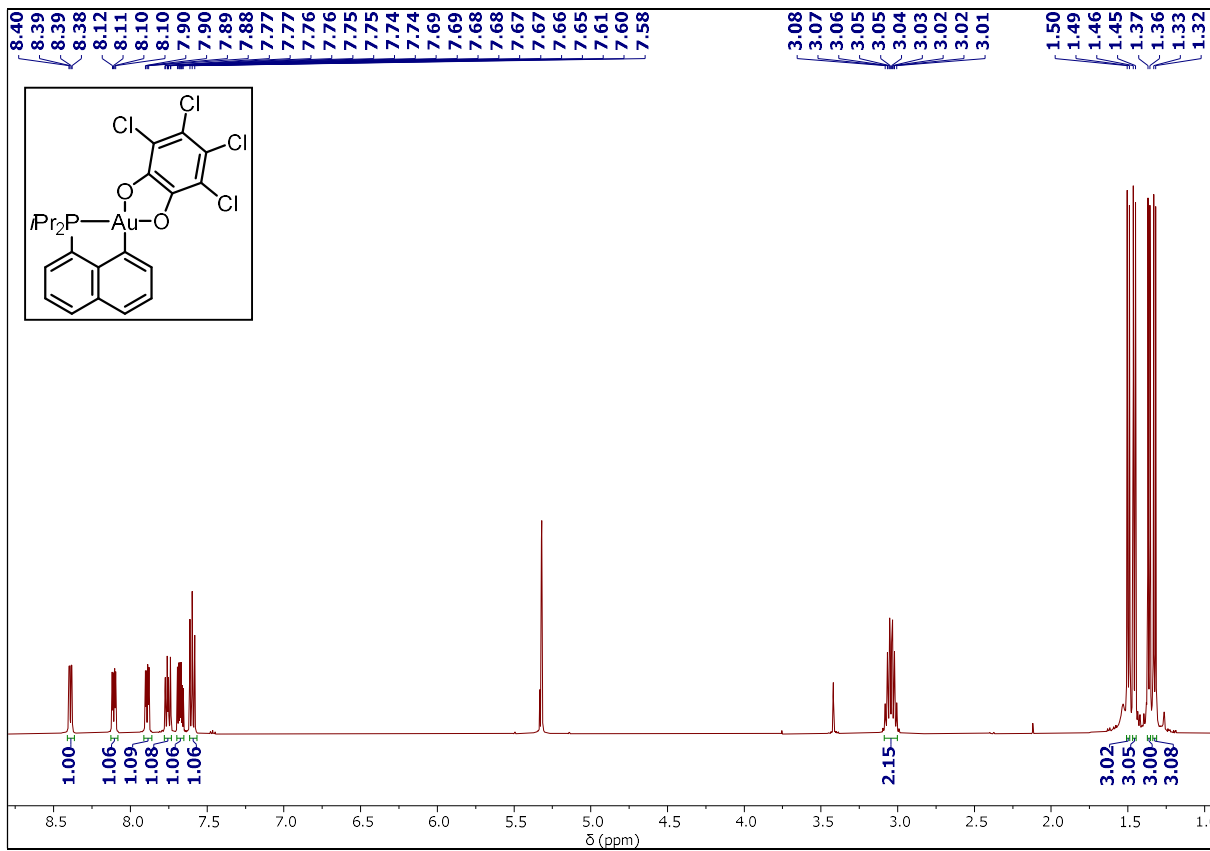

Figure S18.  $^1\text{H}$  NMR spectrum of **3d** in  $\text{CD}_2\text{Cl}_2$ .

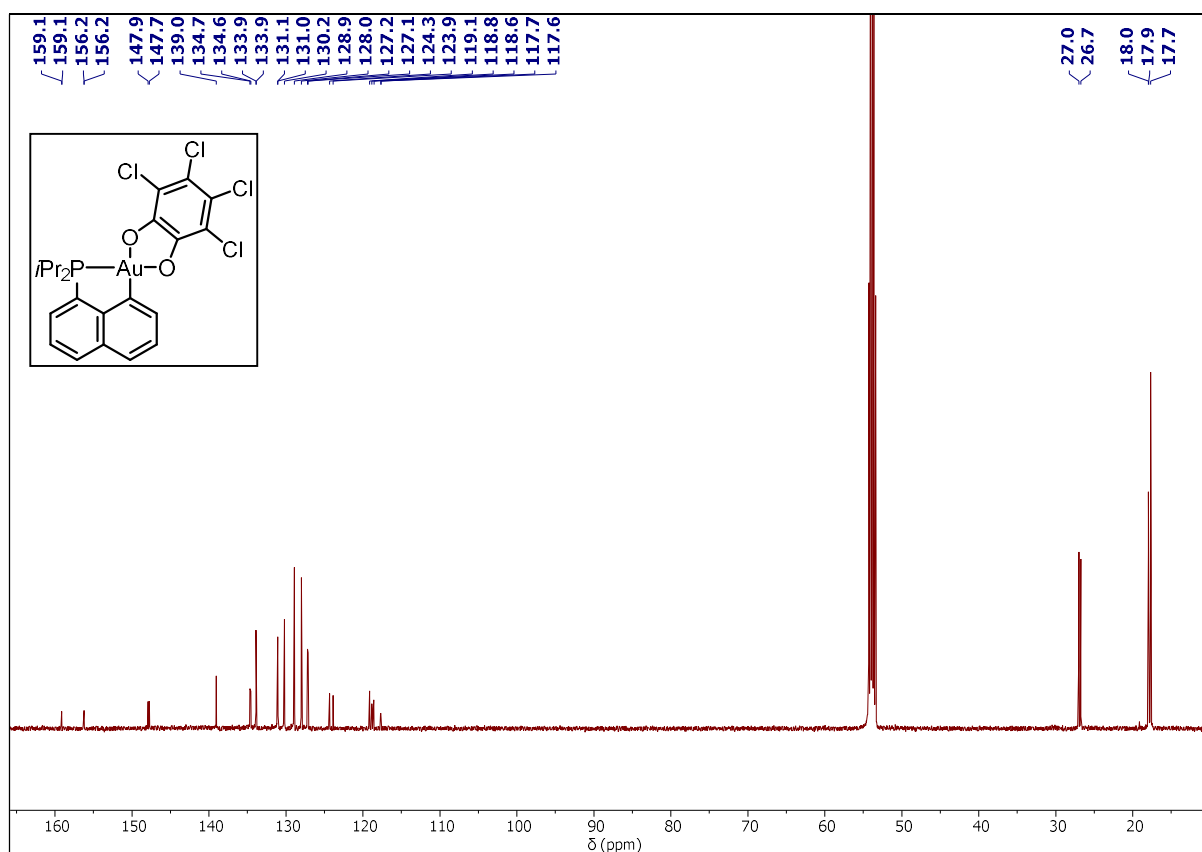

**Figure S19.**  $^{13}\text{C}\{^1\text{H}\}$  NMR spectrum of **3d** in  $\text{CD}_2\text{Cl}_2$ .

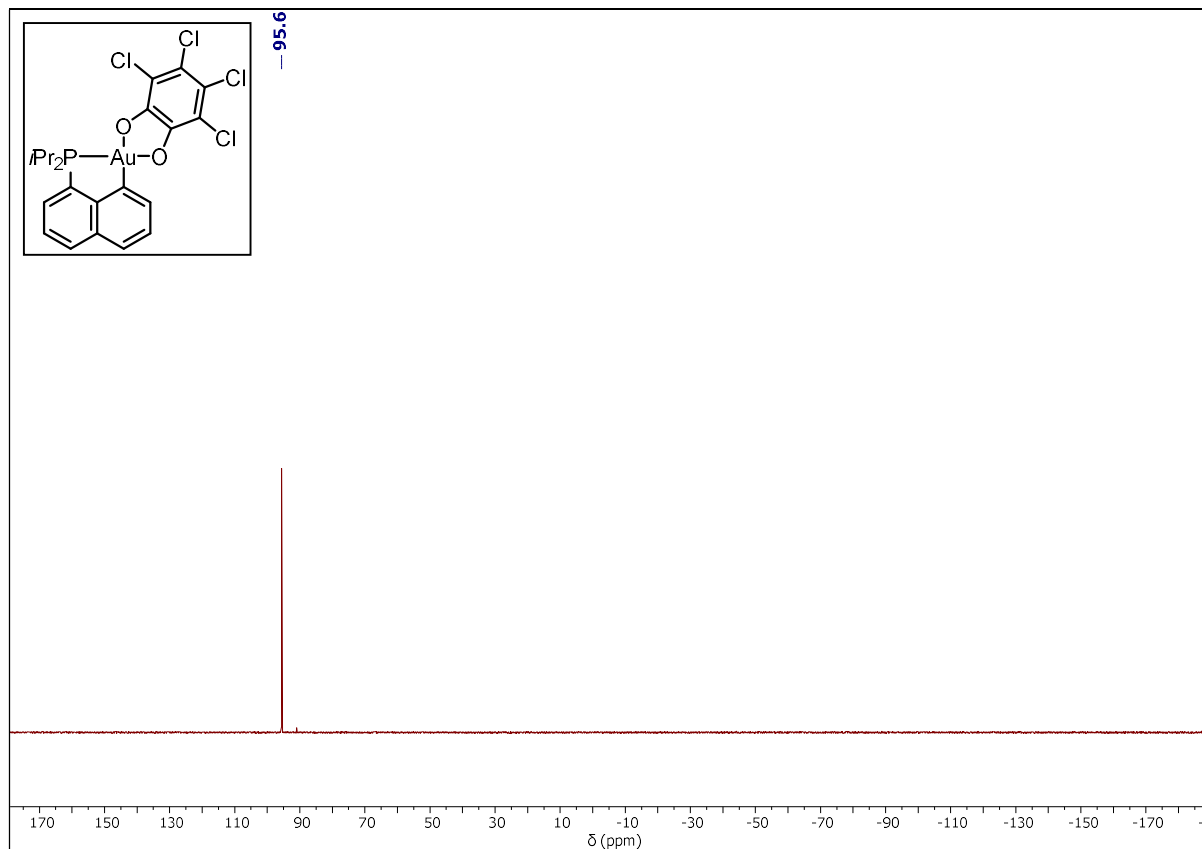

**Figure S20.**  $^{31}\text{P}$  NMR spectrum of **3d** in  $\text{CD}_2\text{Cl}_2$ .

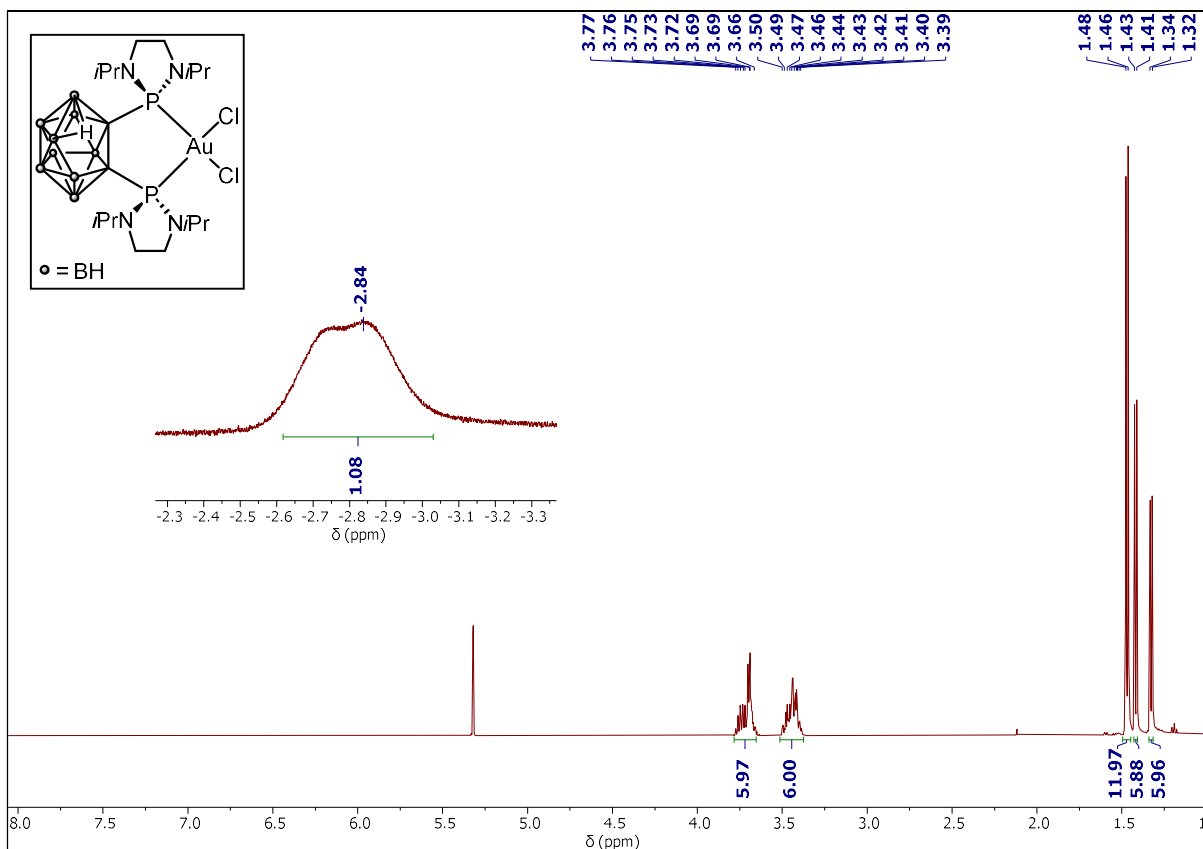

**Figure S21.**  $^1\text{H}$  NMR spectrum of **6** in  $\text{CD}_2\text{Cl}_2$ .

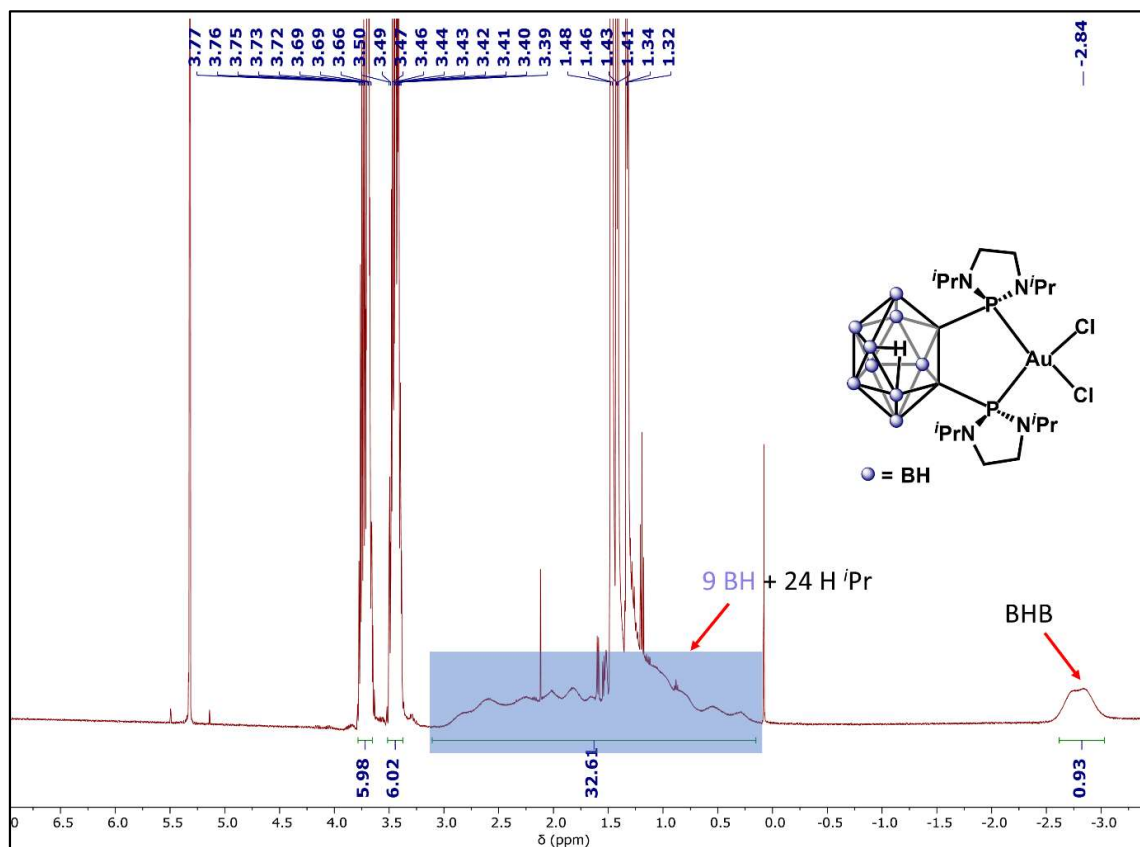

**Figure S22.**  $^1\text{H}$  NMR spectrum of **6** in  $\text{CD}_2\text{Cl}_2$  with zoom on the baseline depicting the BH and the BHB regions.

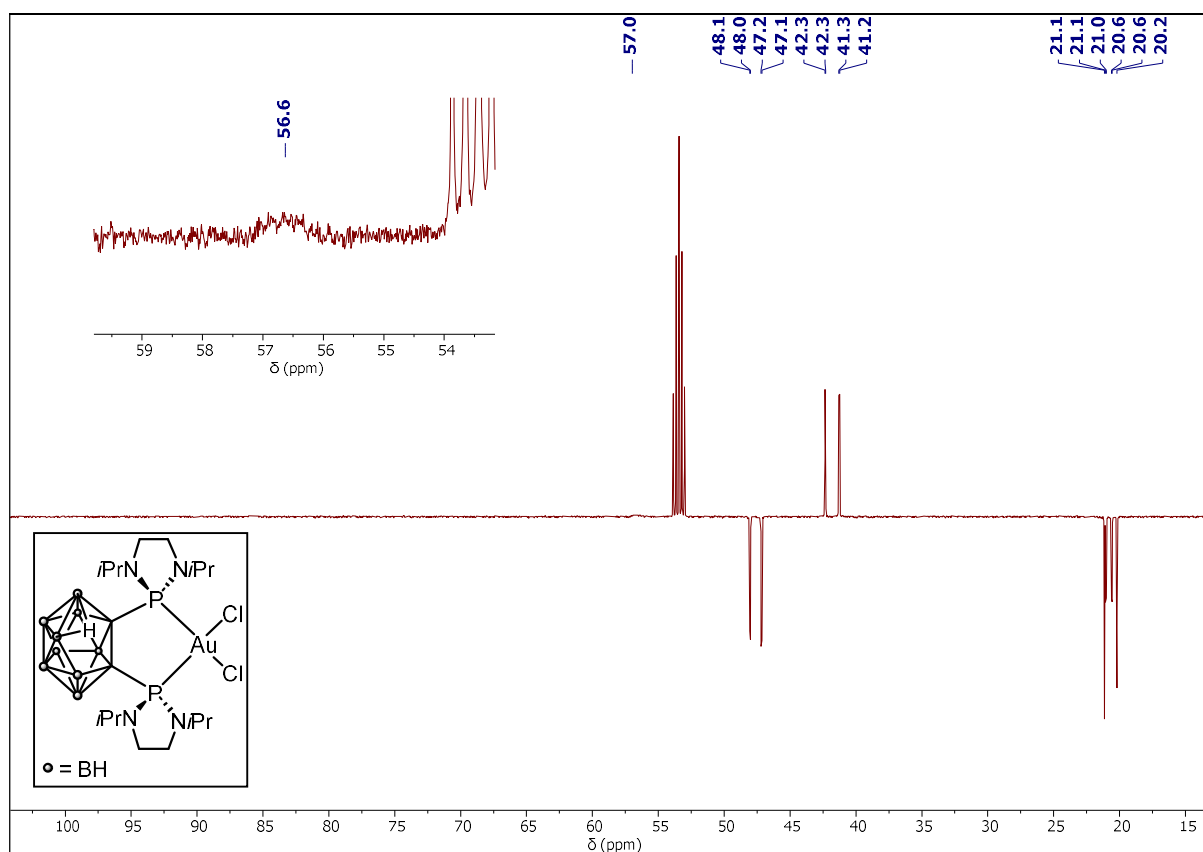

**Figure S23.**  $^{13}\text{C}\{^1\text{H}\}$  NMR spectrum of **6** in  $\text{CD}_2\text{Cl}_2$ .  $^{13}\text{C}$  NMR spectrum with zoom on the baseline depicting the  $\text{C}_{\text{carborane}}$  signals.

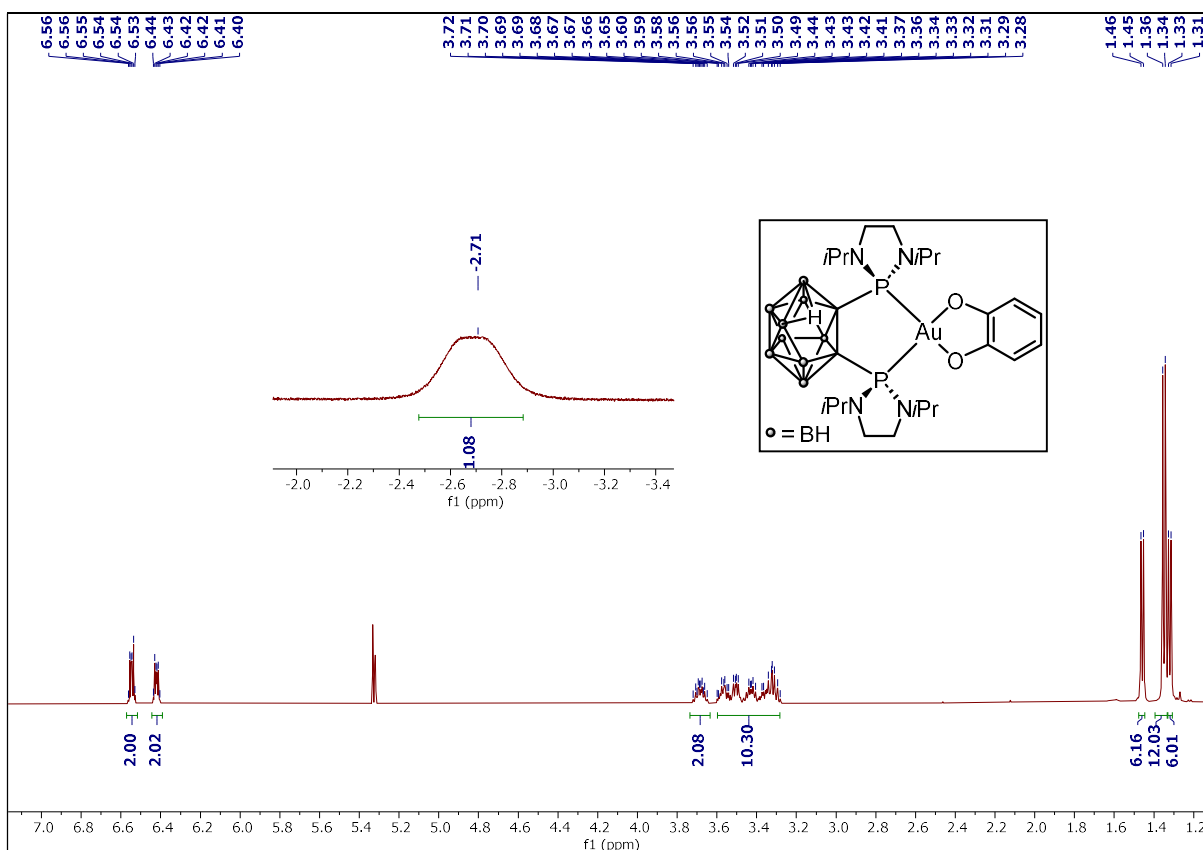

**Figure S24.**  $^1\text{H}$  NMR spectrum of **7a** in  $\text{CD}_2\text{Cl}_2$ .

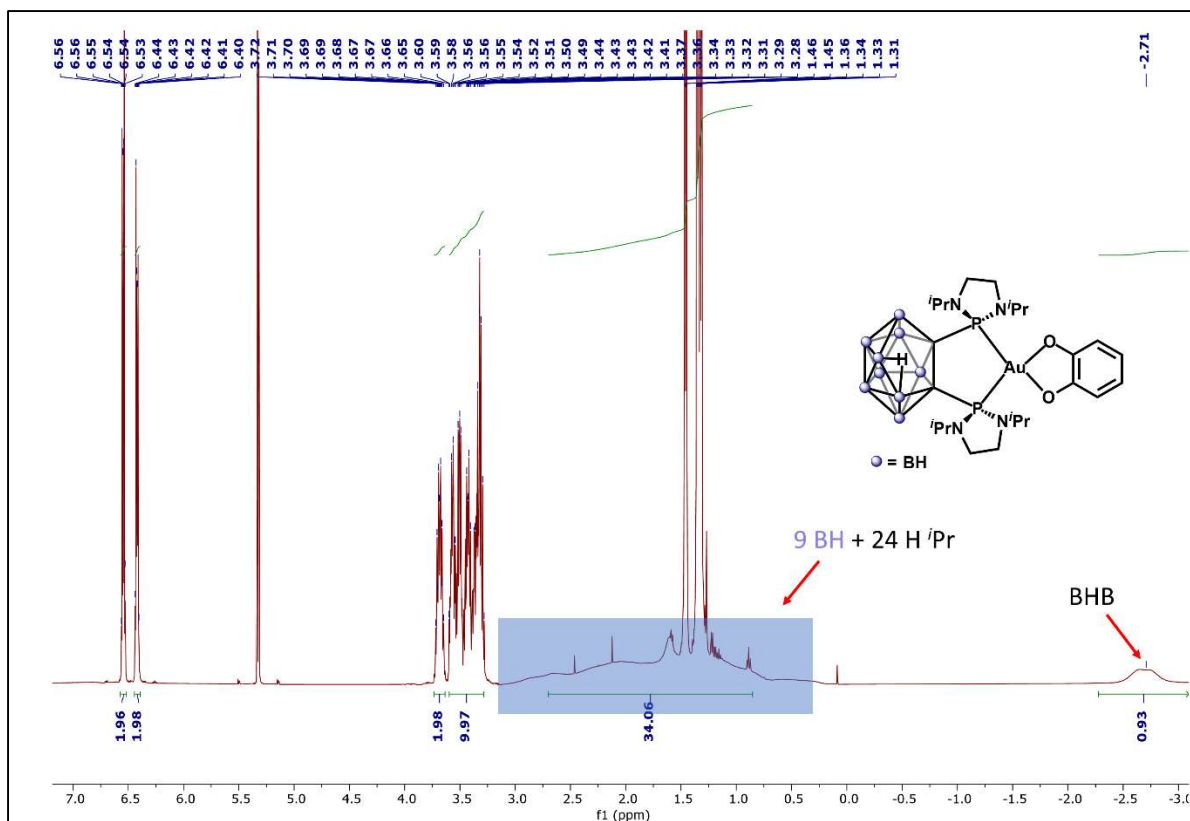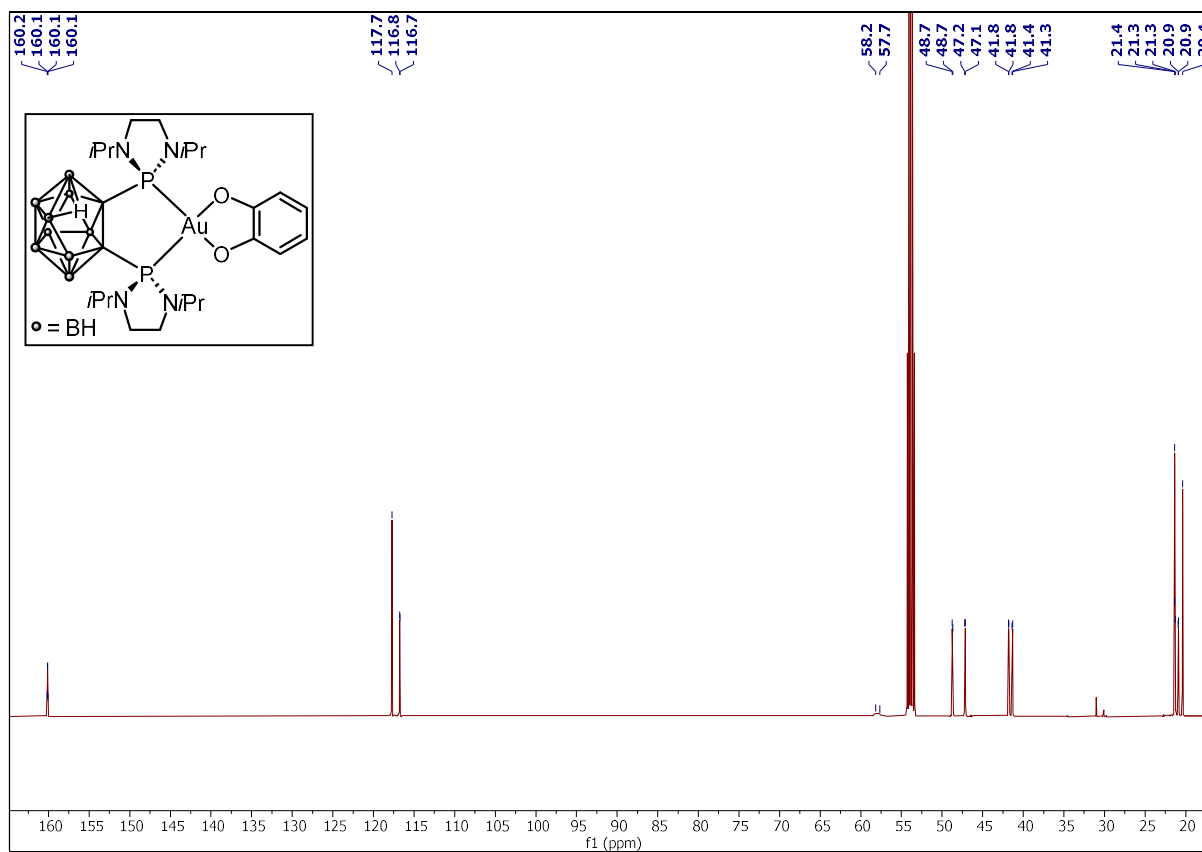

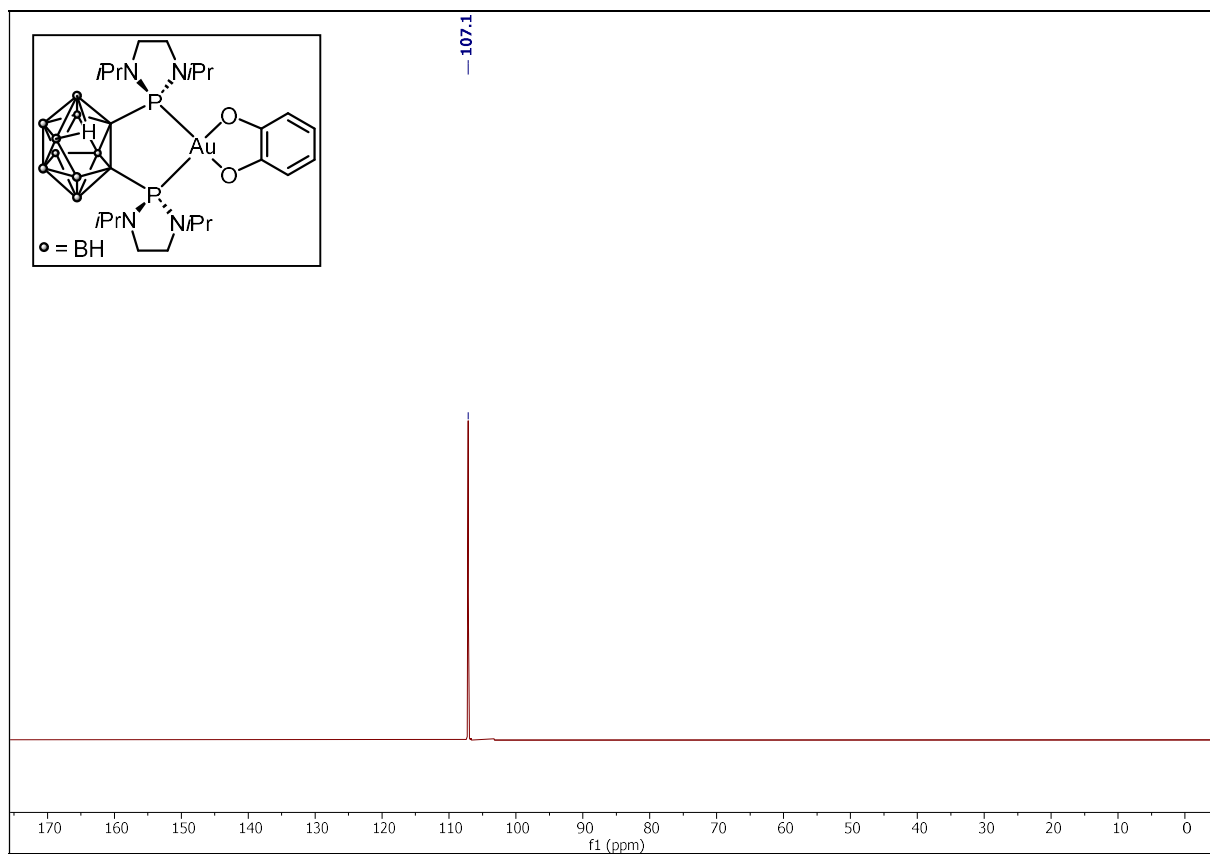

Figure S27.  $^{31}\text{P}$  NMR spectrum of **7a** in  $\text{CD}_2\text{Cl}_2$ .

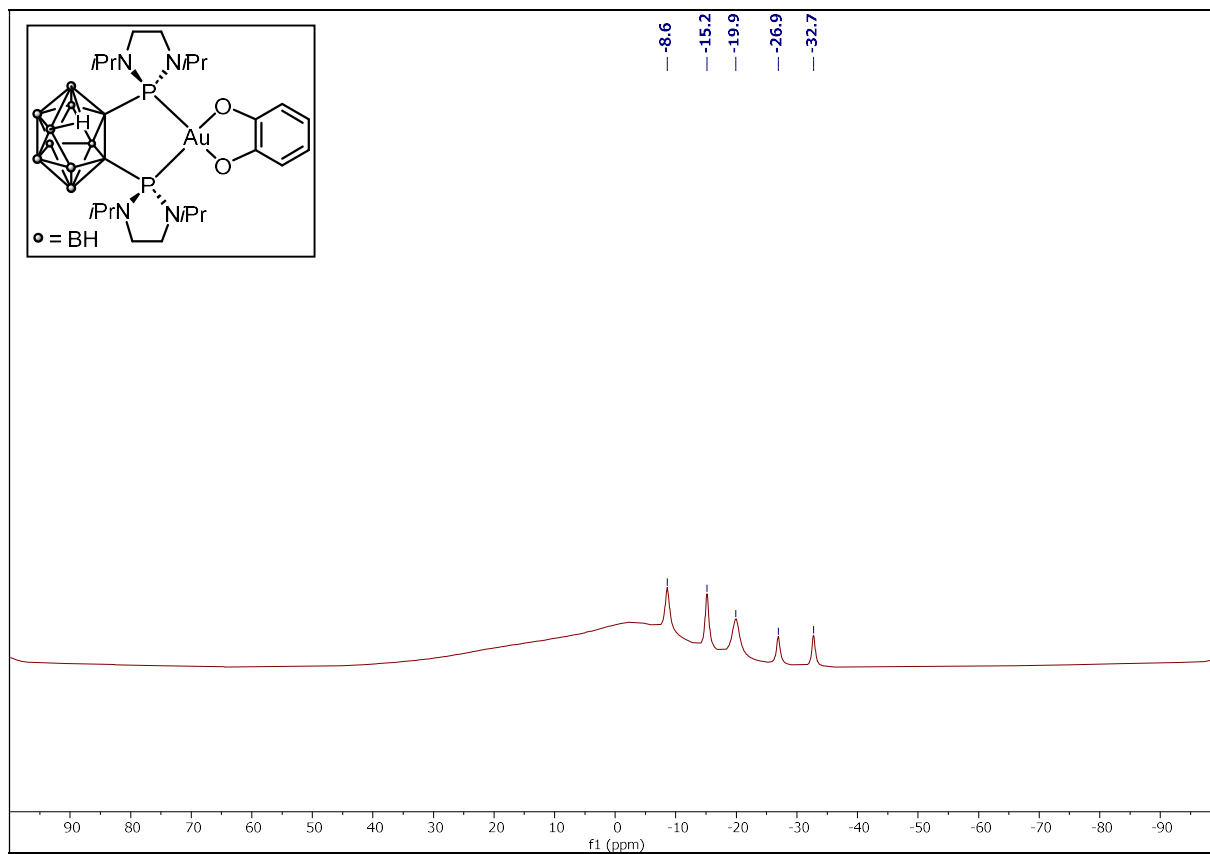

Figure S28.  $^{11}\text{B}$  NMR spectrum of **7a** in  $\text{CD}_2\text{Cl}_2$ .

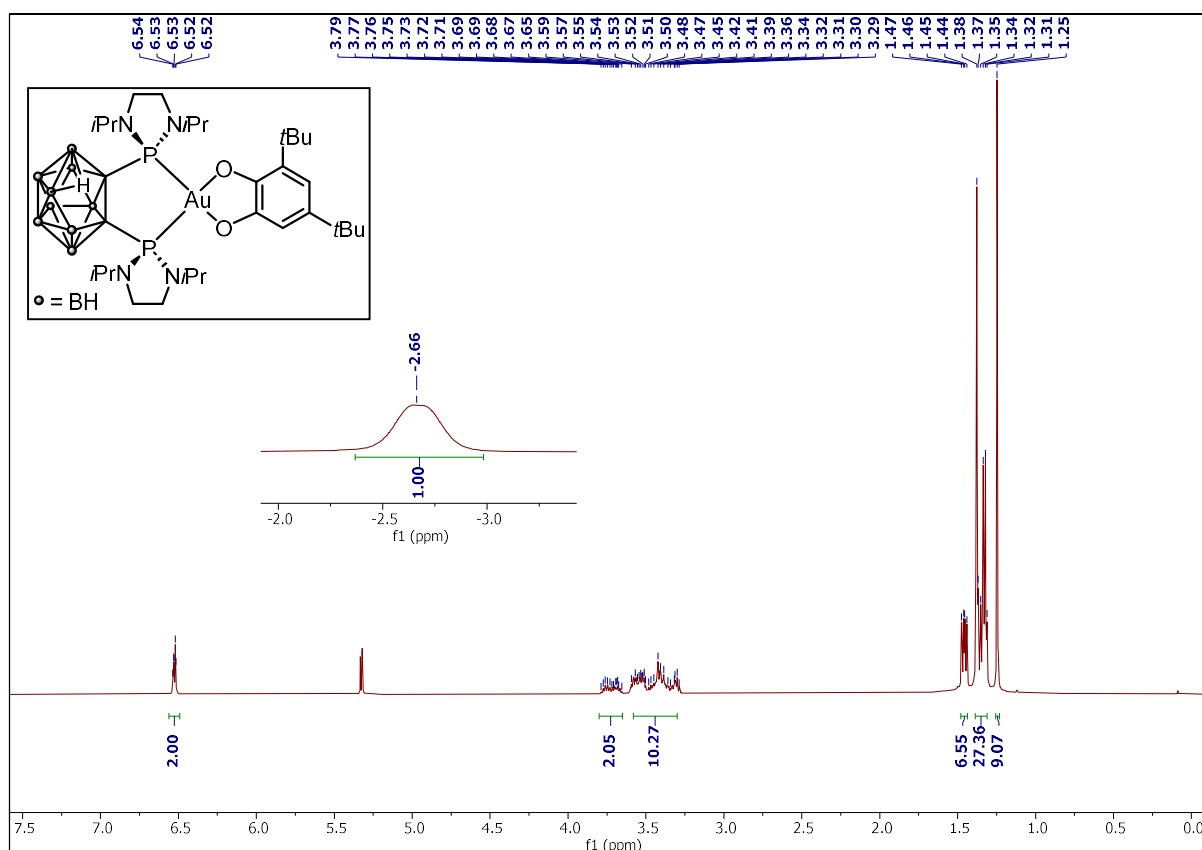

Figure S29.  $^1\text{H}$  NMR spectrum of **7b** in  $\text{CD}_2\text{Cl}_2$ .

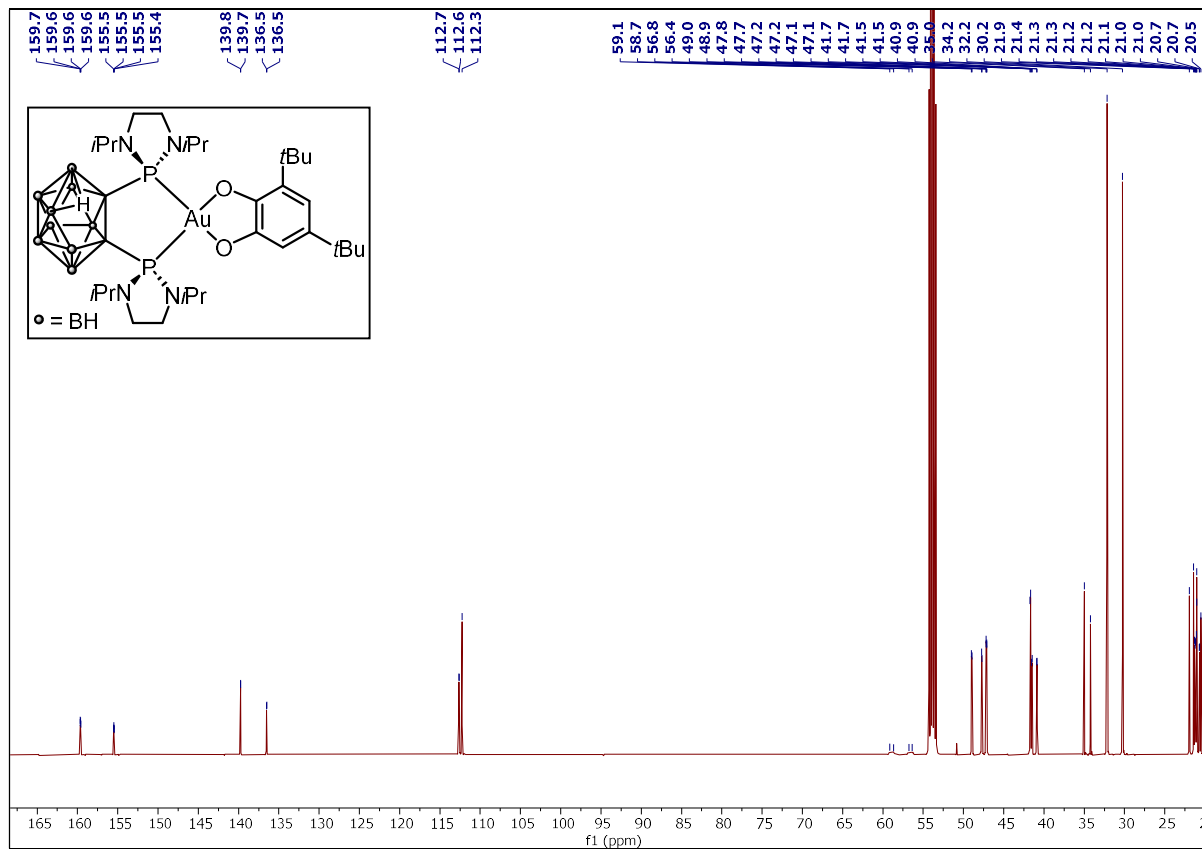

Figure S30.  $^{13}\text{C}\{^1\text{H}\}$  NMR spectrum of **7b** in  $\text{CD}_2\text{Cl}_2$ .

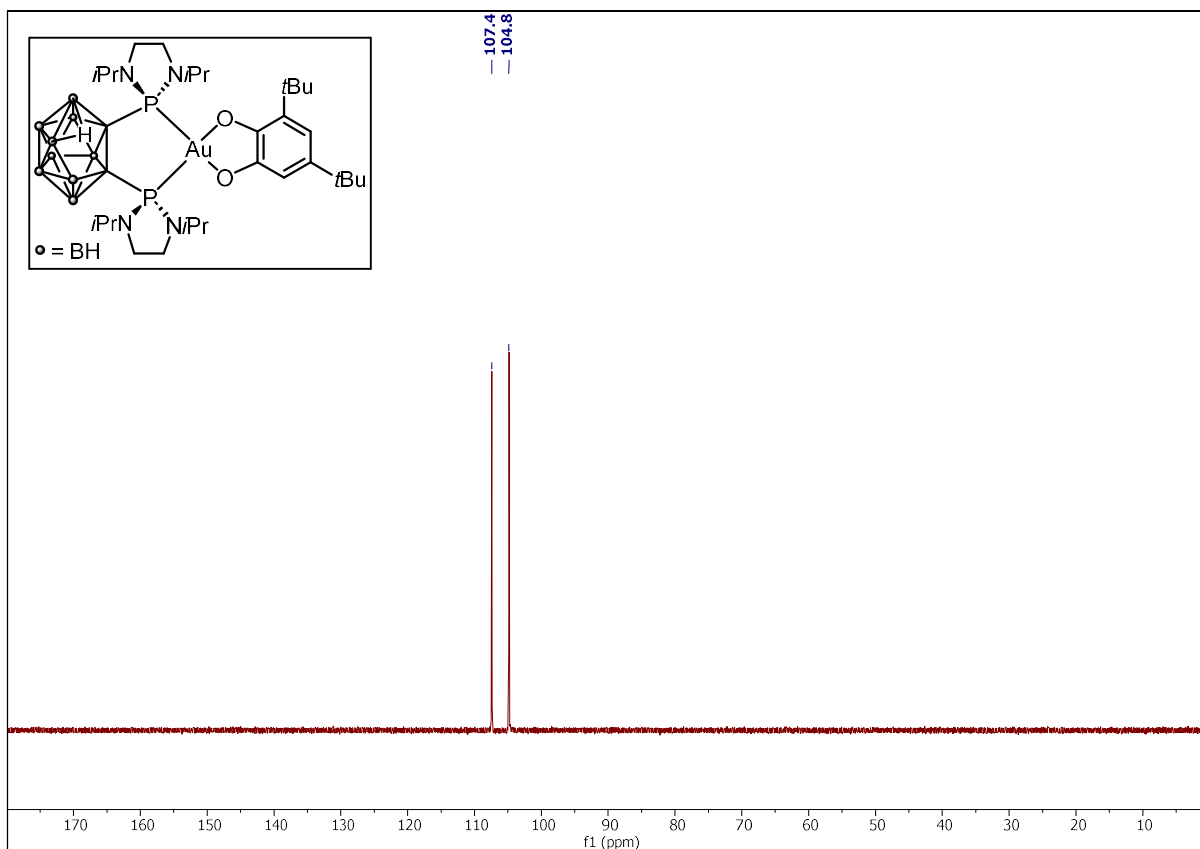

**Figure S31.**  $^{31}\text{P}$  NMR spectrum of **7b** in  $\text{CD}_2\text{Cl}_2$ .

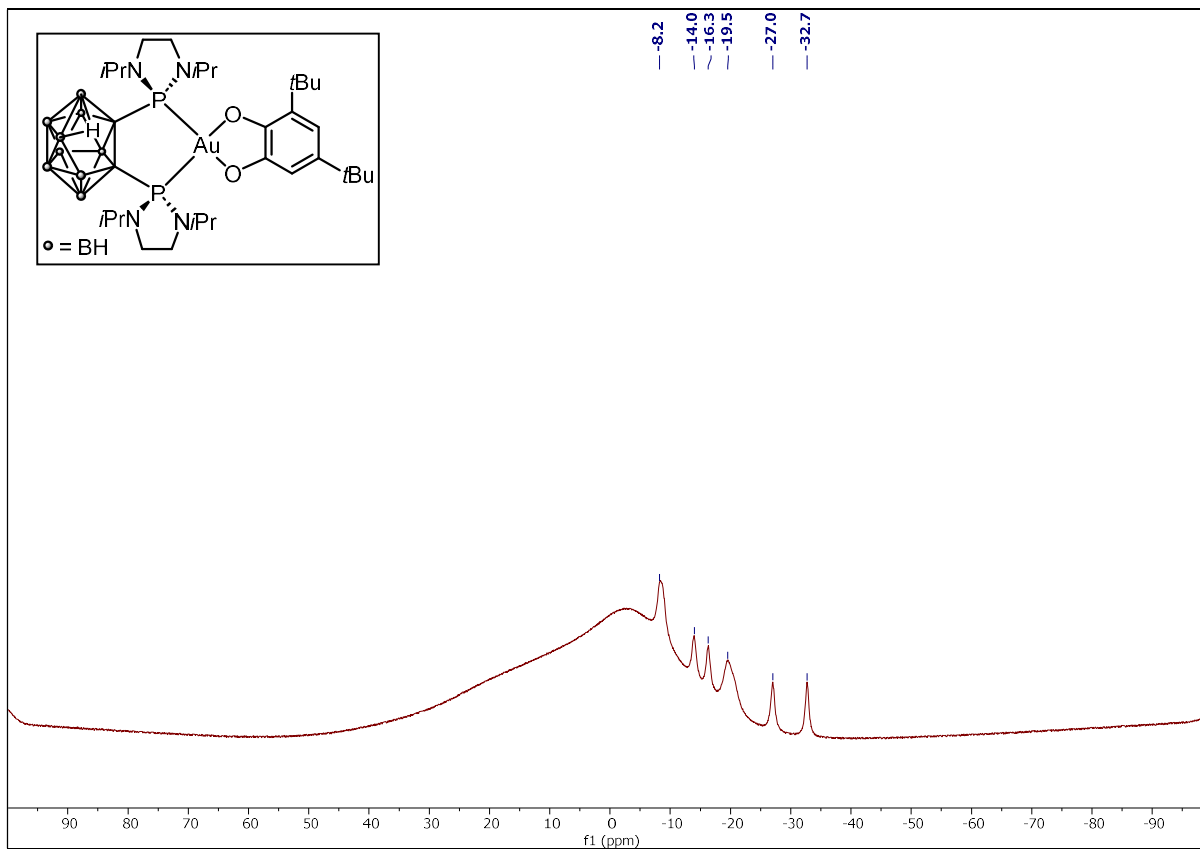

**Figure S32.**  $^{11}\text{B}$  NMR spectrum of **7b** in  $\text{CD}_2\text{Cl}_2$ .



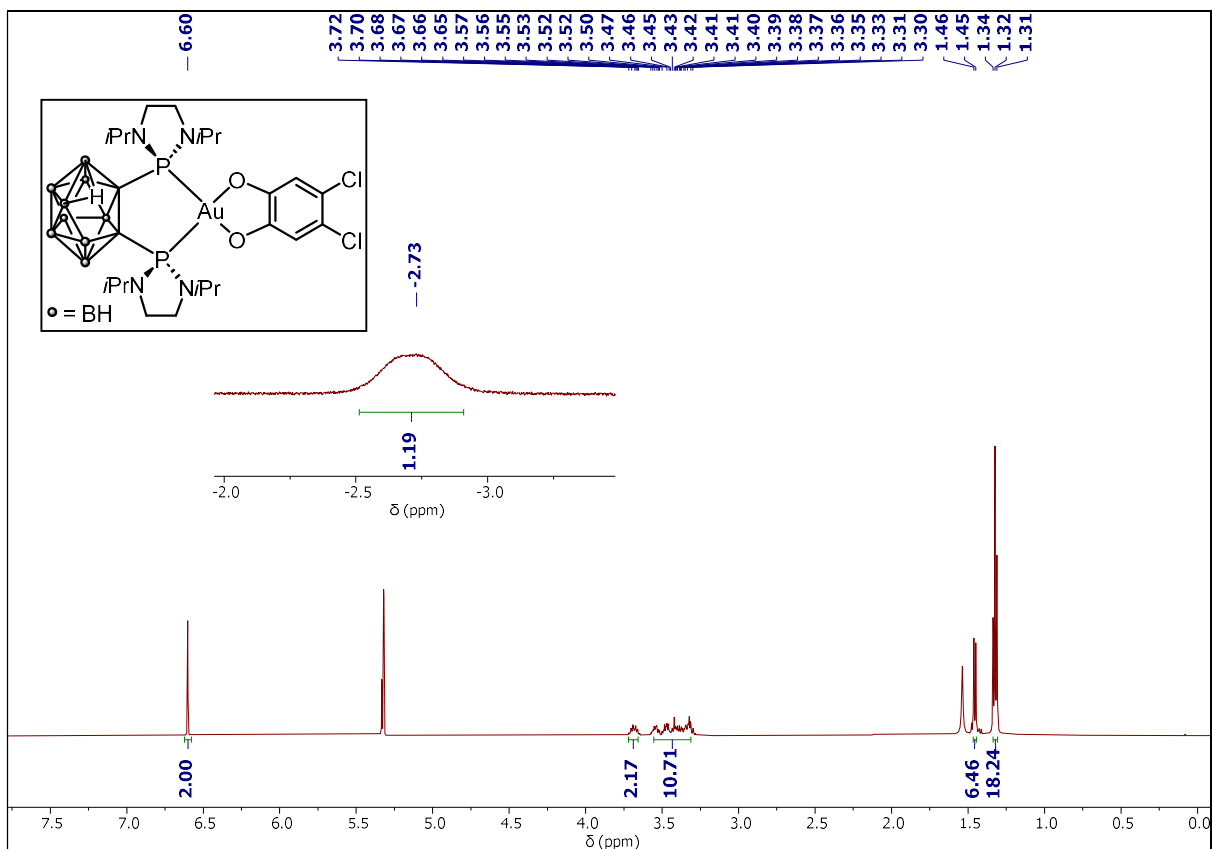

Figure S33.  $^1\text{H}$  NMR spectrum of **7c** in  $\text{CD}_2\text{Cl}_2$ .

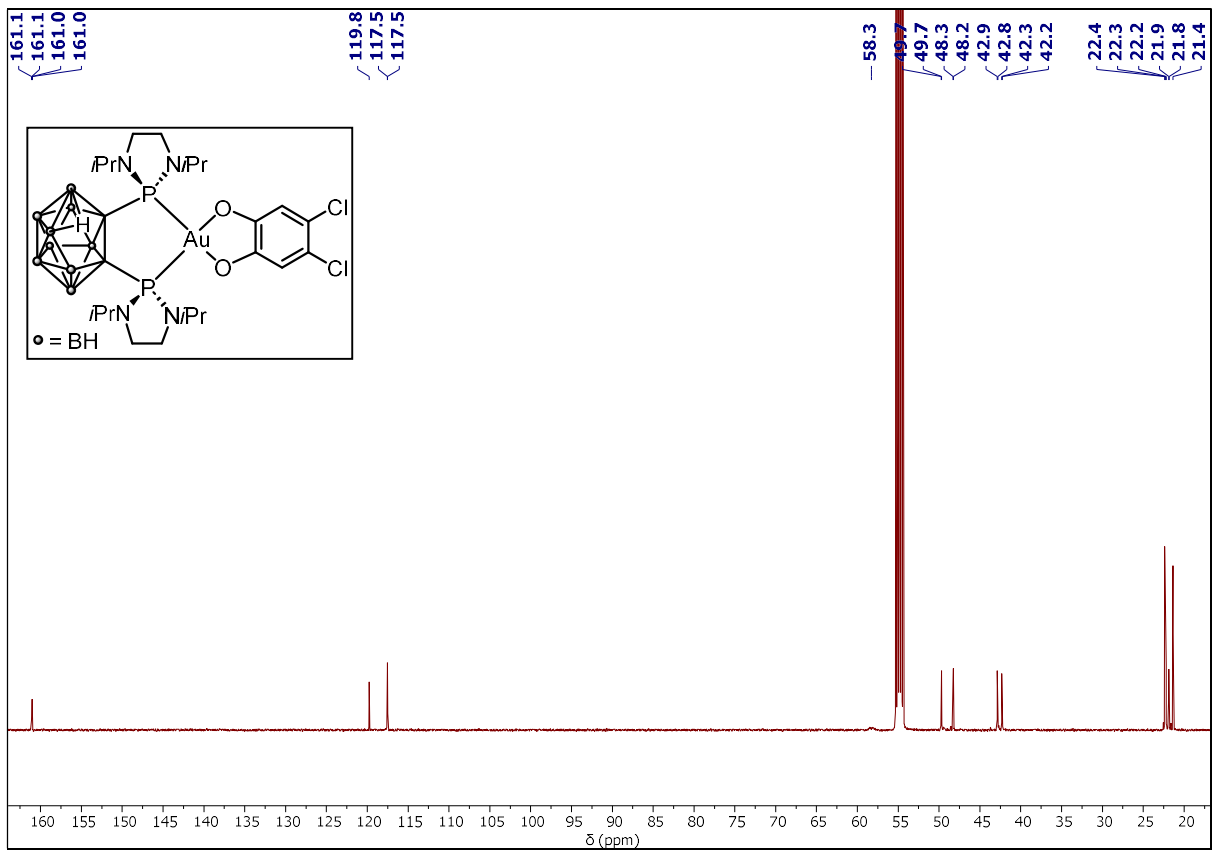

Figure S34.  $^{13}\text{C}\{^1\text{H}\}$  NMR spectrum of **7c** in  $\text{CD}_2\text{Cl}_2$ .

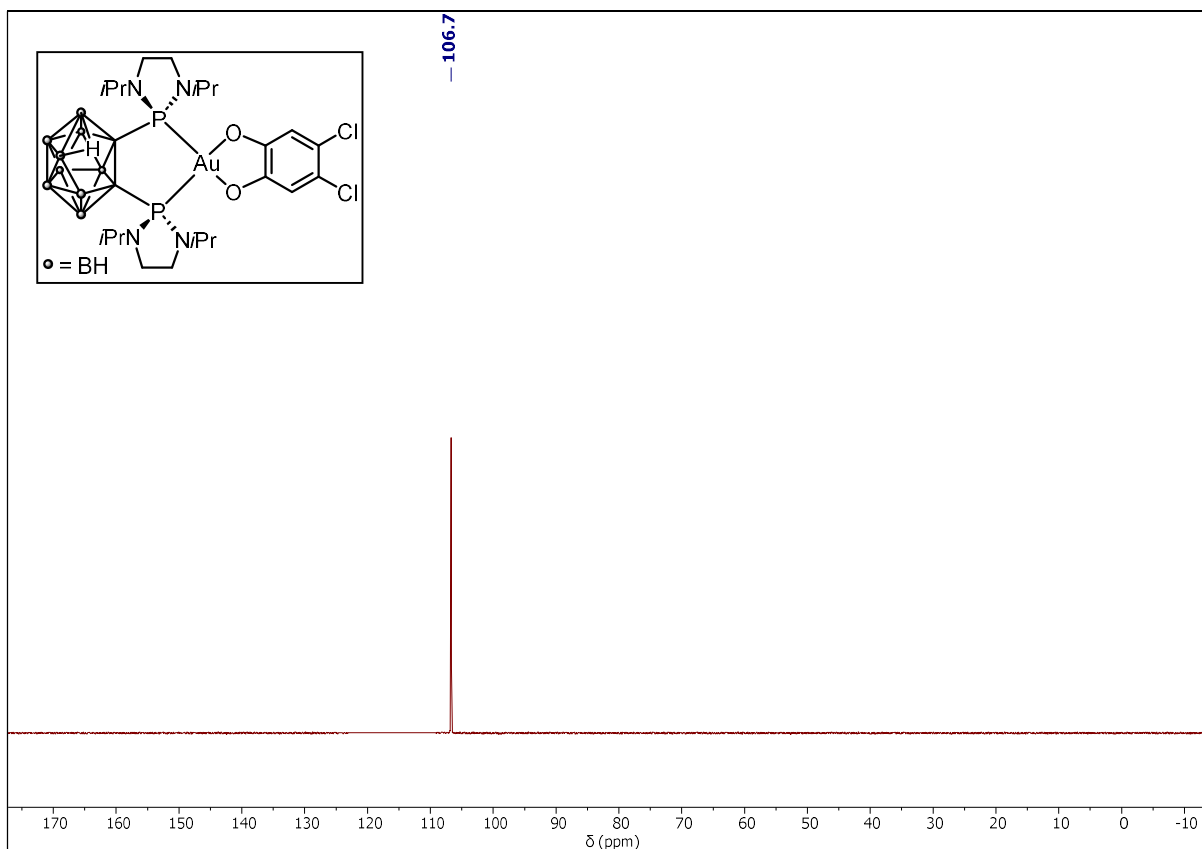

**Figure S35.**  $^{31}\text{P}$  NMR spectrum of **7c** in  $\text{CD}_2\text{Cl}_2$ .

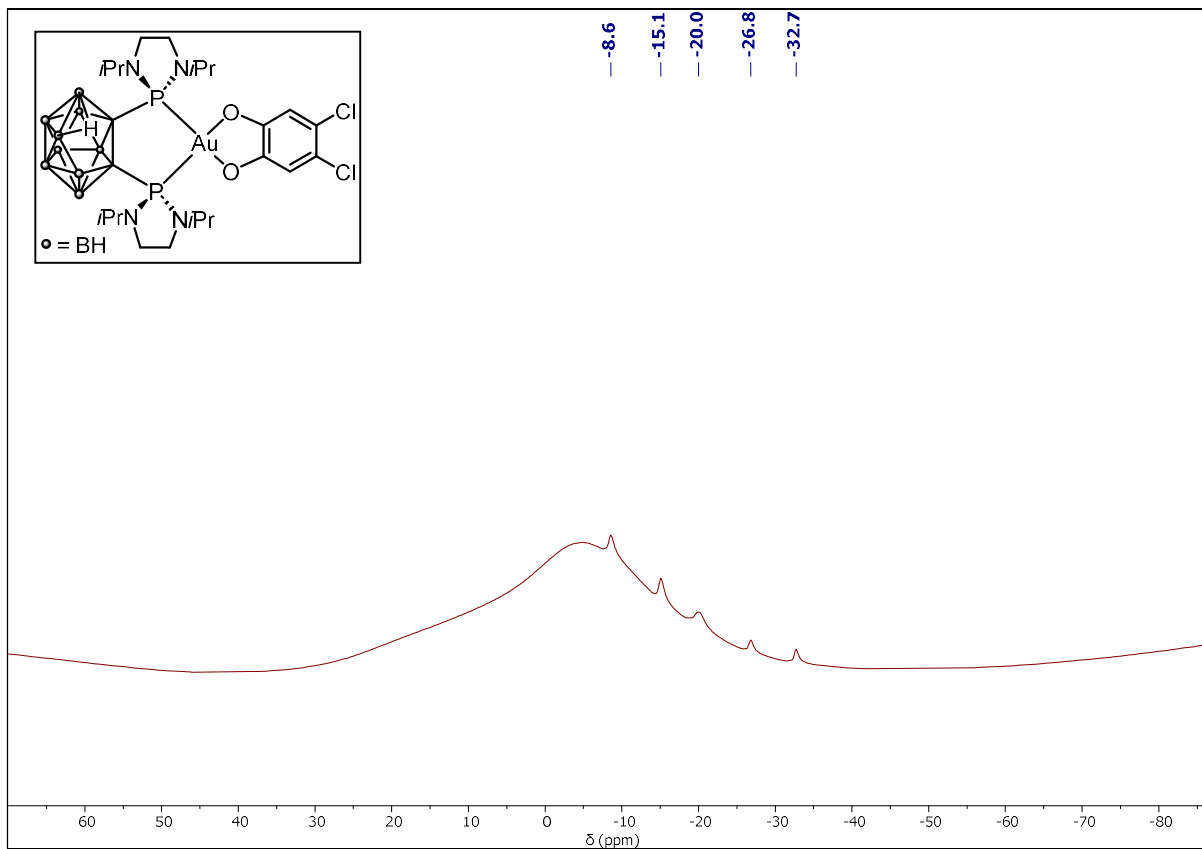

**Figure S36.**  $^{11}\text{B}$  NMR spectrum of **7c** in  $\text{CD}_2\text{Cl}_2$ .

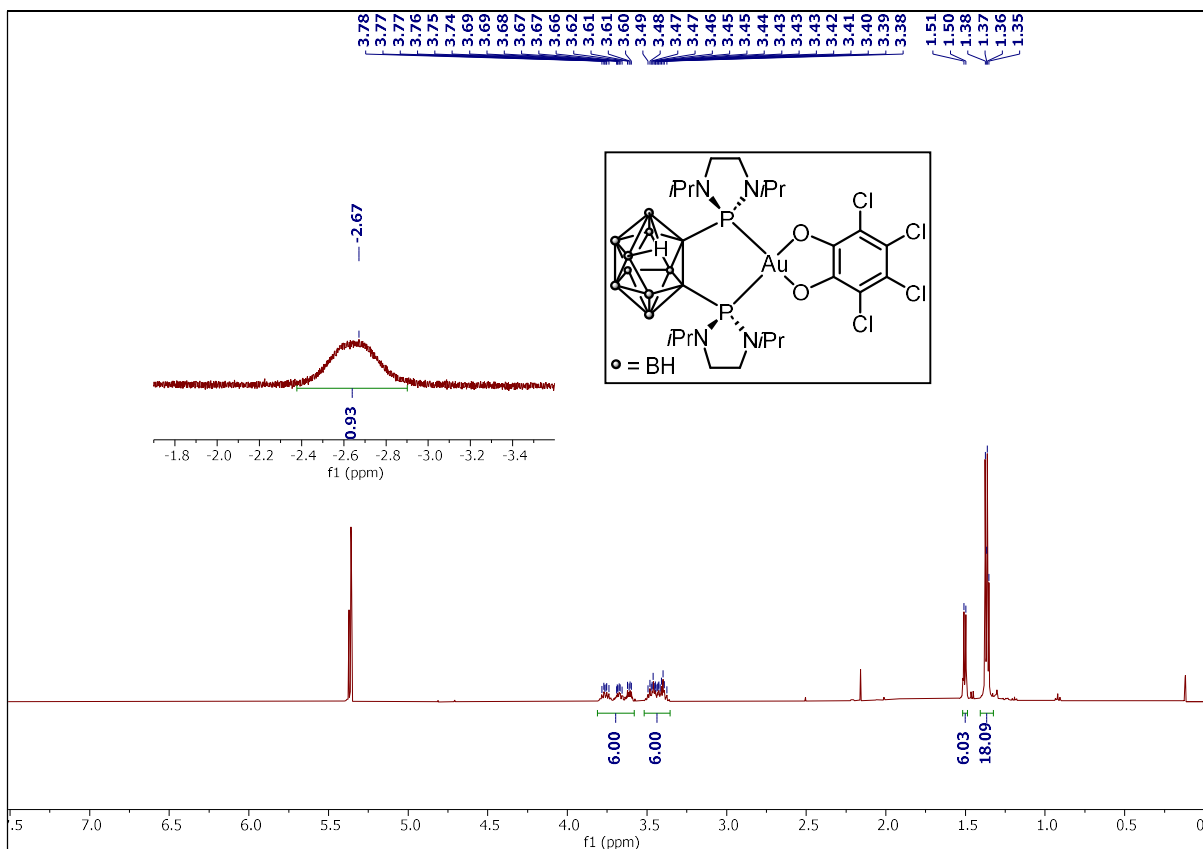

Figure S37.  $^1\text{H}$  NMR spectrum of **7d** in  $\text{CD}_2\text{Cl}_2$ .

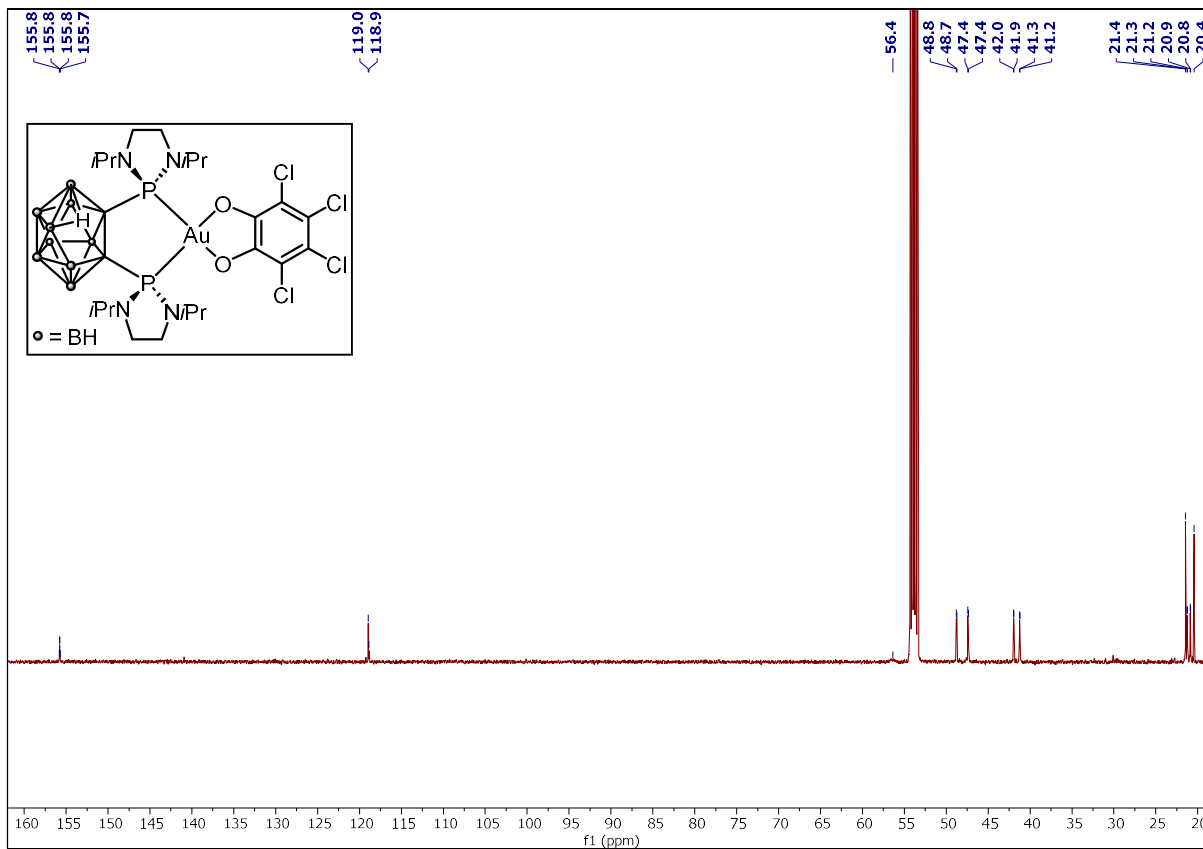

Figure S38.  $^{13}\text{C}\{^1\text{H}\}$  NMR spectrum of **7d** in  $\text{CD}_2\text{Cl}_2$ .

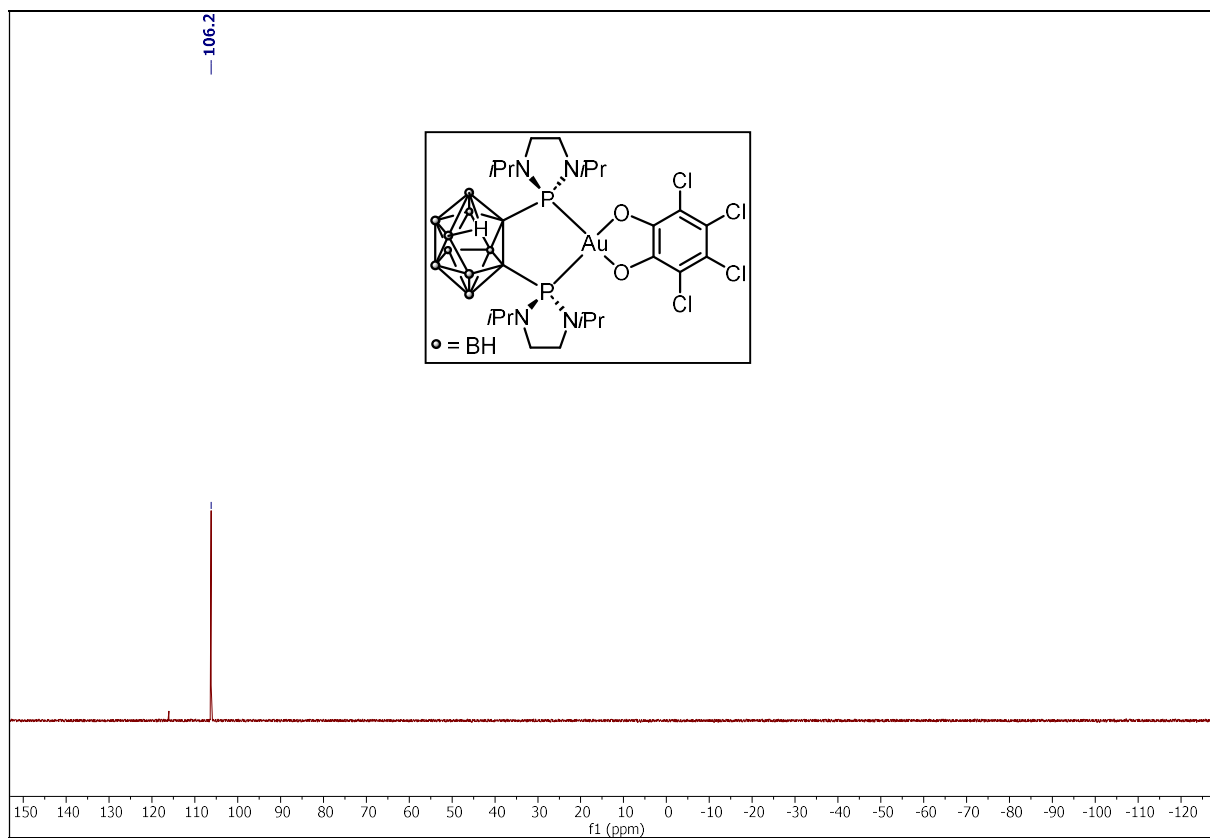

**Figure S39.**  $^{31}\text{P}$  NMR spectrum of **7d** in  $\text{CD}_2\text{Cl}_2$ .

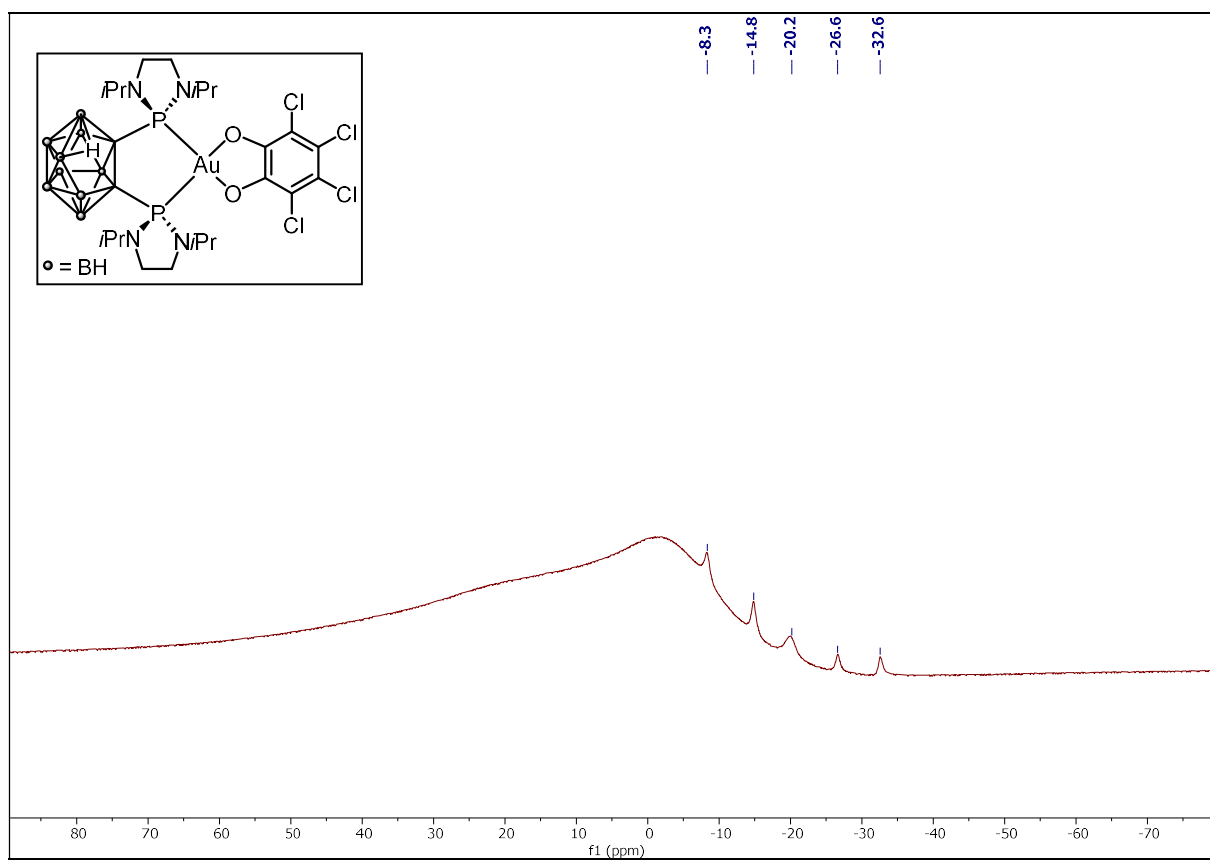

**Figure S40.**  $^{11}\text{B}$  NMR spectrum of **7d** in  $\text{CD}_2\text{Cl}_2$ .

## 8. Isomerization experiment

To a solution of **3b-1** (0.01 mmol) in  $\text{CD}_2\text{Cl}_2$  (0.3 ml) were added different amounts of **4b** (0, 0.5 and 1 equiv.) in  $\text{CD}_2\text{Cl}_2$  (0.2 ml) and  $^1\text{H}$  NMR of the mixtures were recorded immediately upon mixture and after 60 and 120 min.

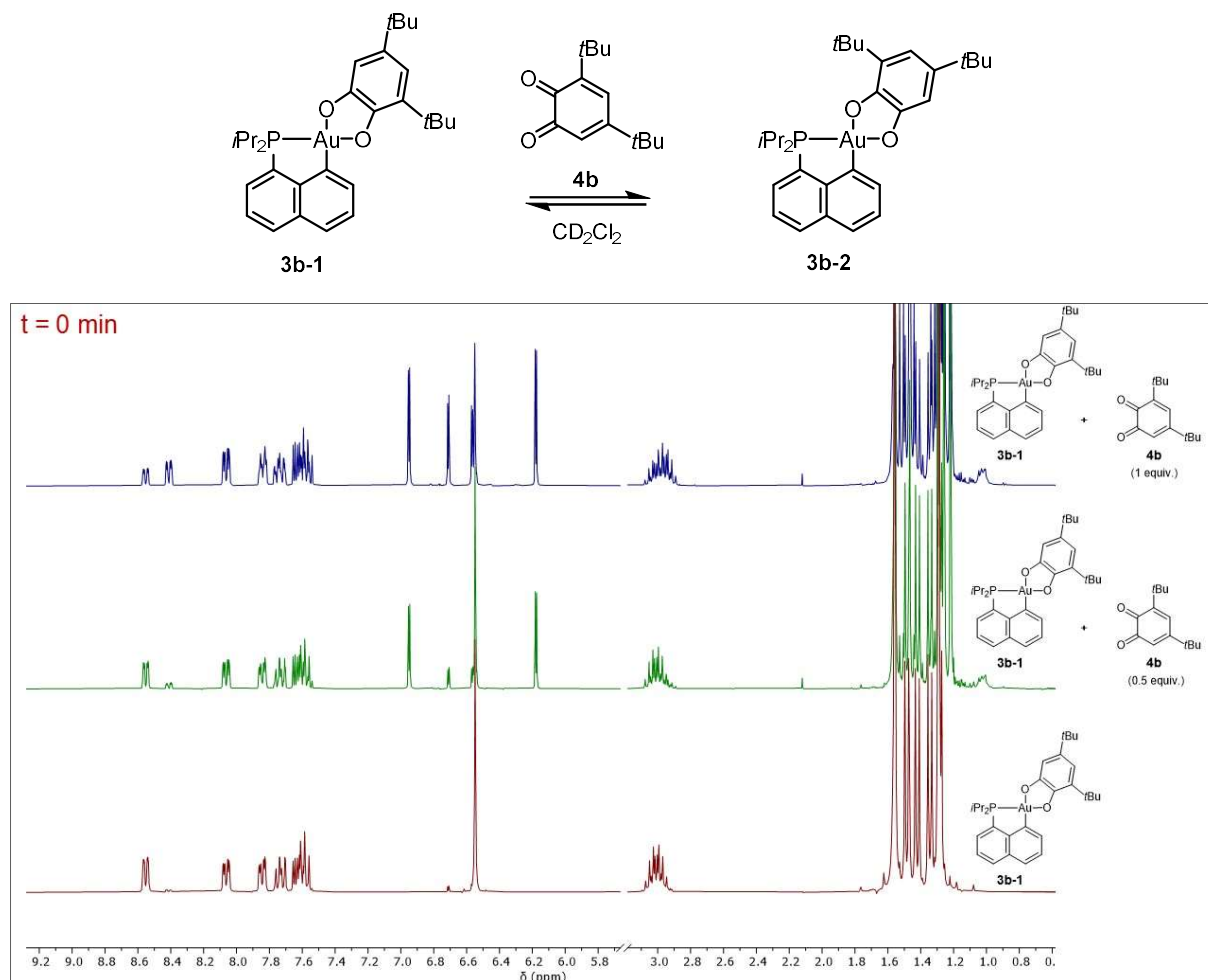

**Figure S41.**  $^1\text{H}$  NMR spectra for the isomerization experiment in  $\text{CD}_2\text{Cl}_2$  at  $t = 0$  min.

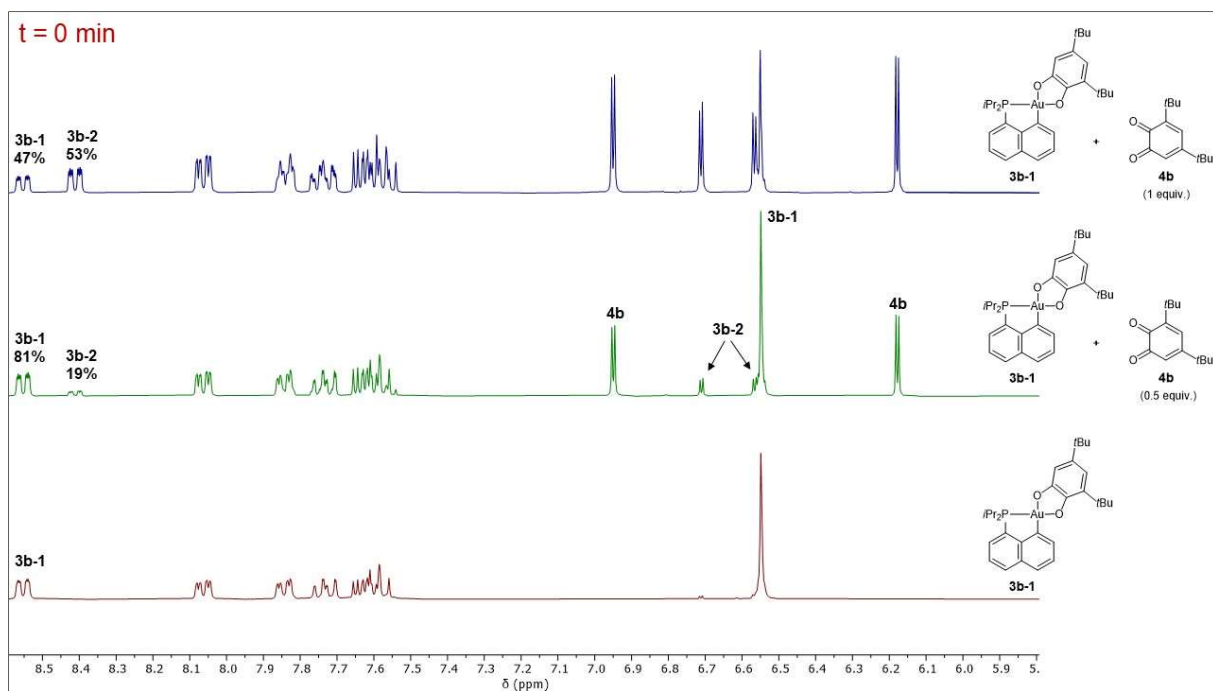

**Figure S42.**  $^1\text{H}$  NMR spectra for the isomerization experiment in  $\text{CD}_2\text{Cl}_2$  at **t = 0 min.** (5.8-8.6 ppm zone)

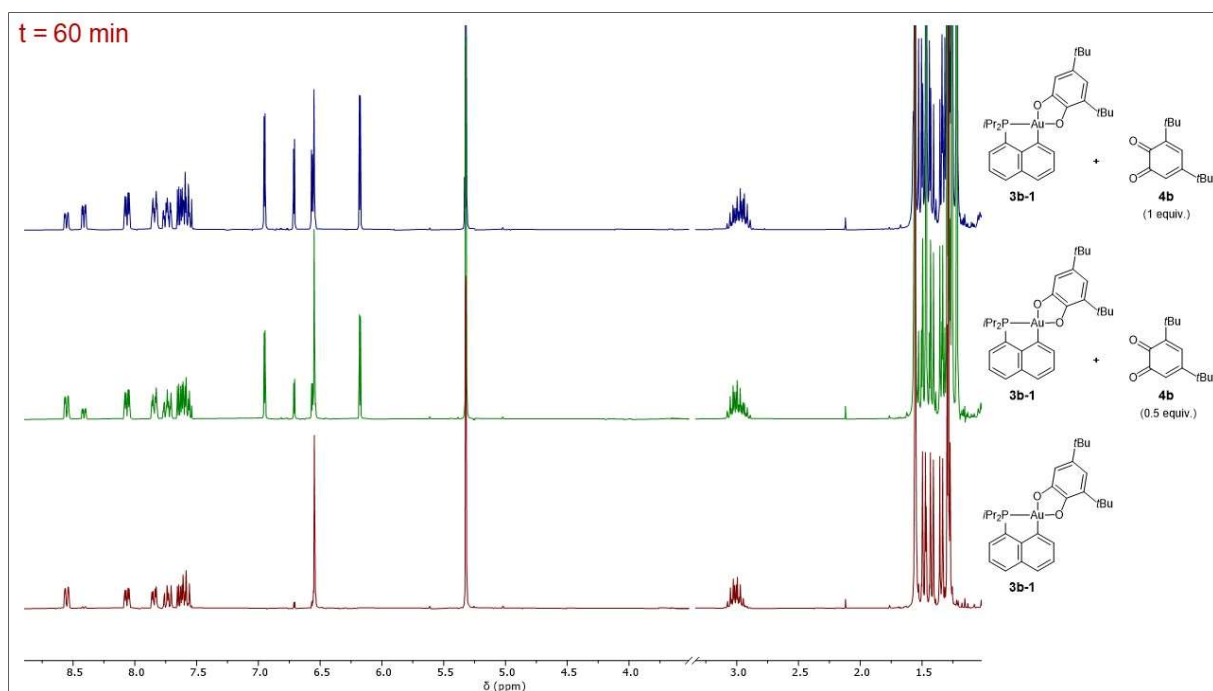

**Figure S43.**  $^1\text{H}$  NMR spectra for the isomerization experiment in  $\text{CD}_2\text{Cl}_2$  at **t = 60 min.**

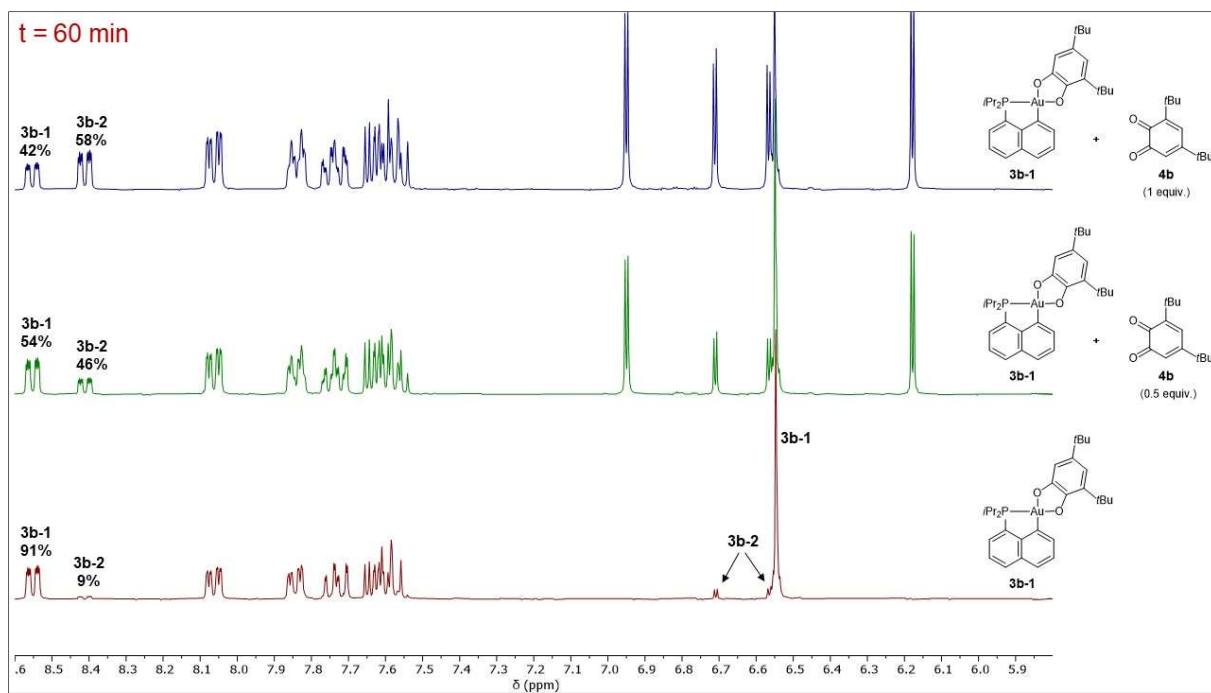

**Figure S44.**  $^1\text{H}$  NMR spectra for the isomerization experiment in  $\text{CD}_2\text{Cl}_2$  at **t = 60 min.** (5.8-8.6 ppm zone)

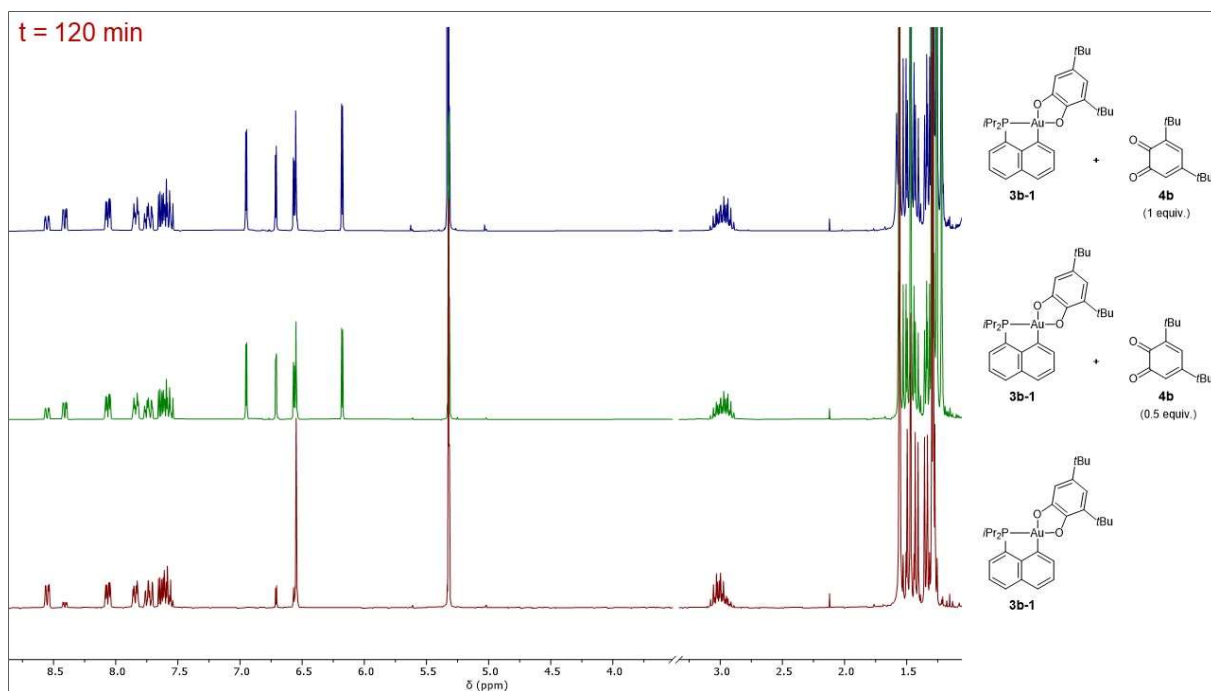

**Figure S45.**  $^1\text{H}$  NMR spectra for the isomerization experiment in  $\text{CD}_2\text{Cl}_2$  at **t = 120 min.**

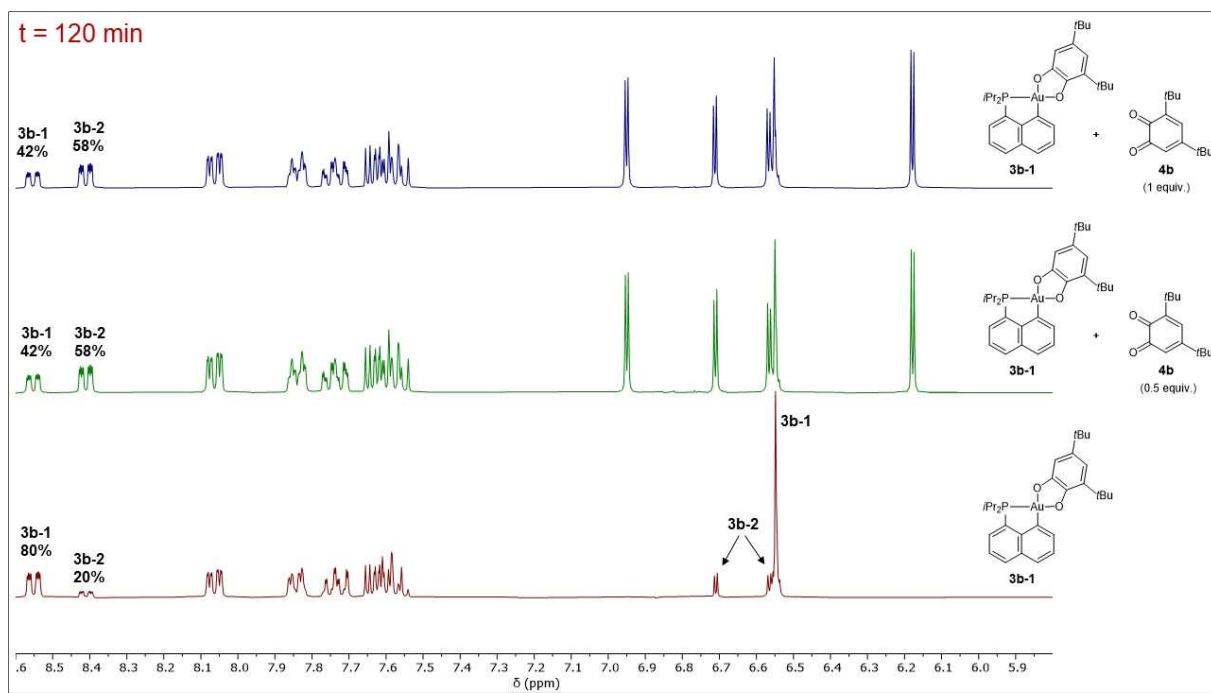

**Figure S46.**  $^1\text{H}$  NMR spectra for the isomerization experiment in  $\text{CD}_2\text{Cl}_2$  at **t = 120 min.** (5.8-8.6 ppm zone)



## 9. Catechol exchange experiments

### P<sup>^</sup>C Systems

To a solution of the (P<sup>^</sup>C)Au catecholate complex (**3b-1** or **3a**) (0.01 mmol) in CD<sub>2</sub>Cl<sub>2</sub> (250 μL) a solution of benzoquinone **4c** or **4d** (0.01 mmol, 1 equiv.) was added in CD<sub>2</sub>Cl<sub>2</sub> (250 μL). The mixture was placed in an NMR tube and <sup>1</sup>H NMR spectrum was recorded immediately. The reaction of **3a** with **4d** was also monitored using <sup>13</sup>C{<sup>1</sup>H} NMR.

### 9.1 (P<sup>^</sup>C)Au(pyrocatechol) to (P<sup>^</sup>C)Au(tetrachlorocatechol)

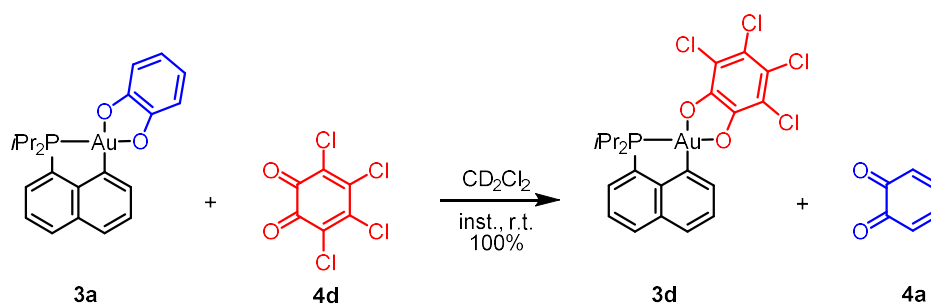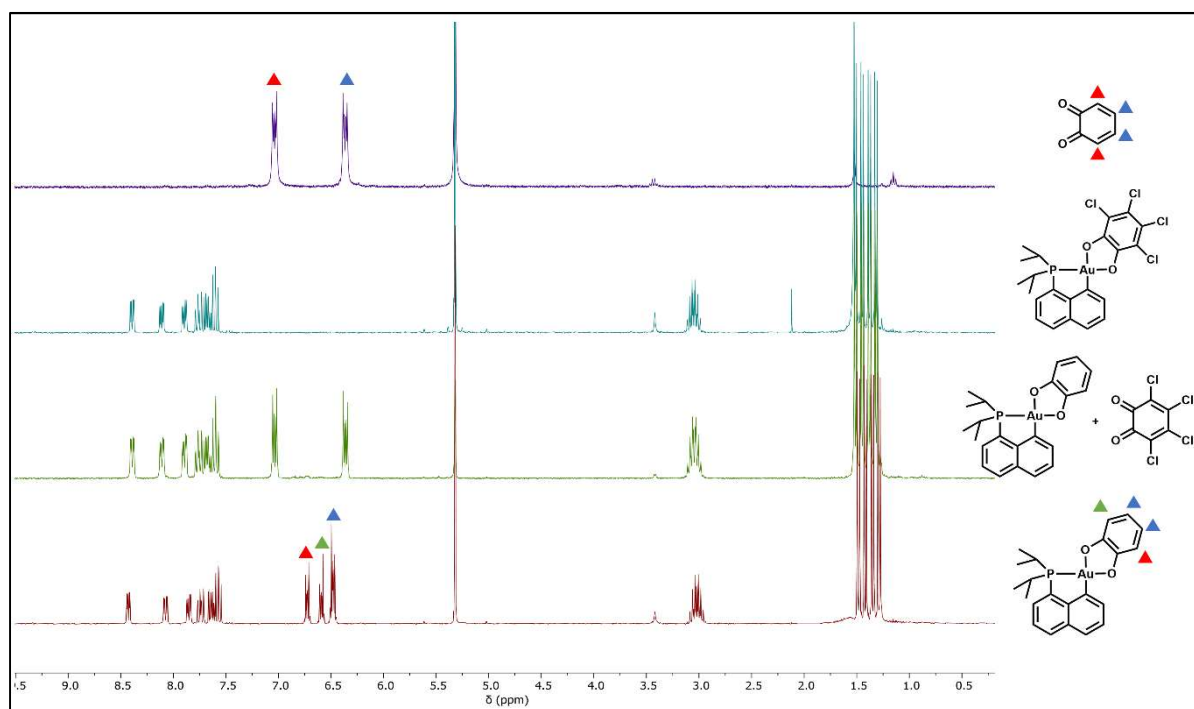

**Figure S47.** <sup>1</sup>H NMR spectra of the reaction of **3a** with **4d**.

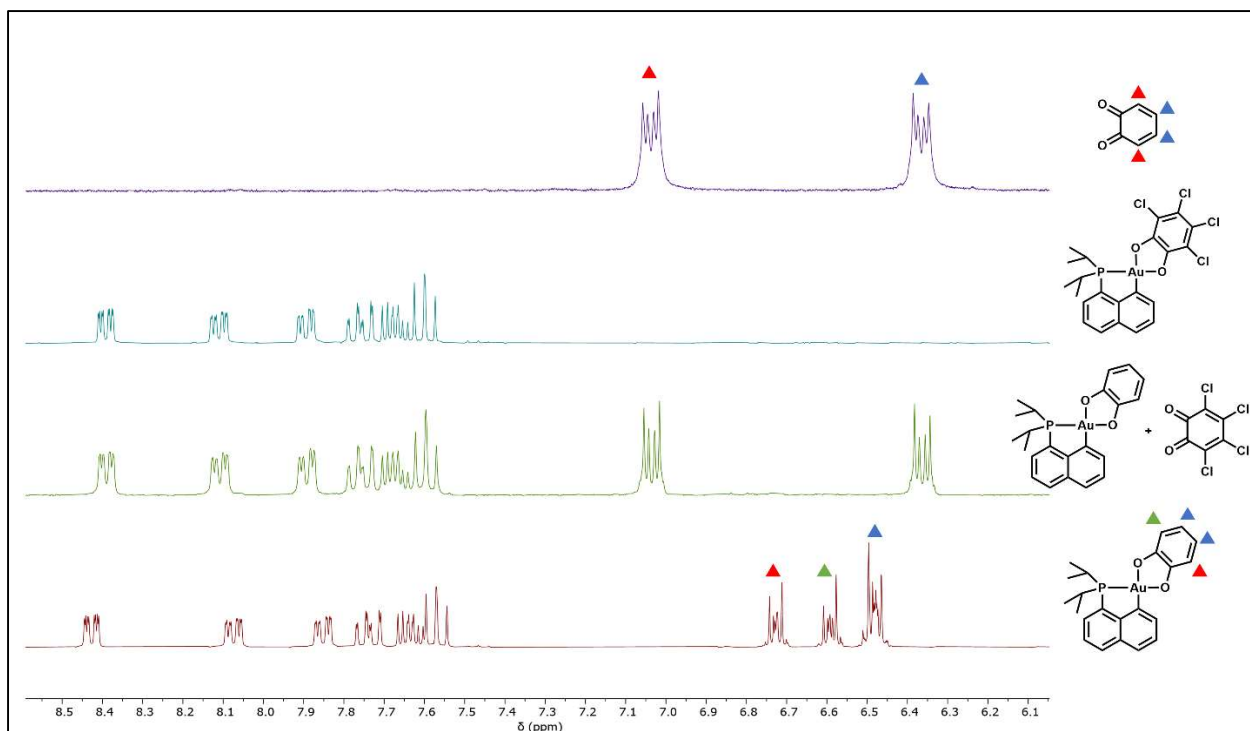

**Figure S48.**  $^1\text{H}$  NMR spectra of the reaction of **3a** with **4d**.

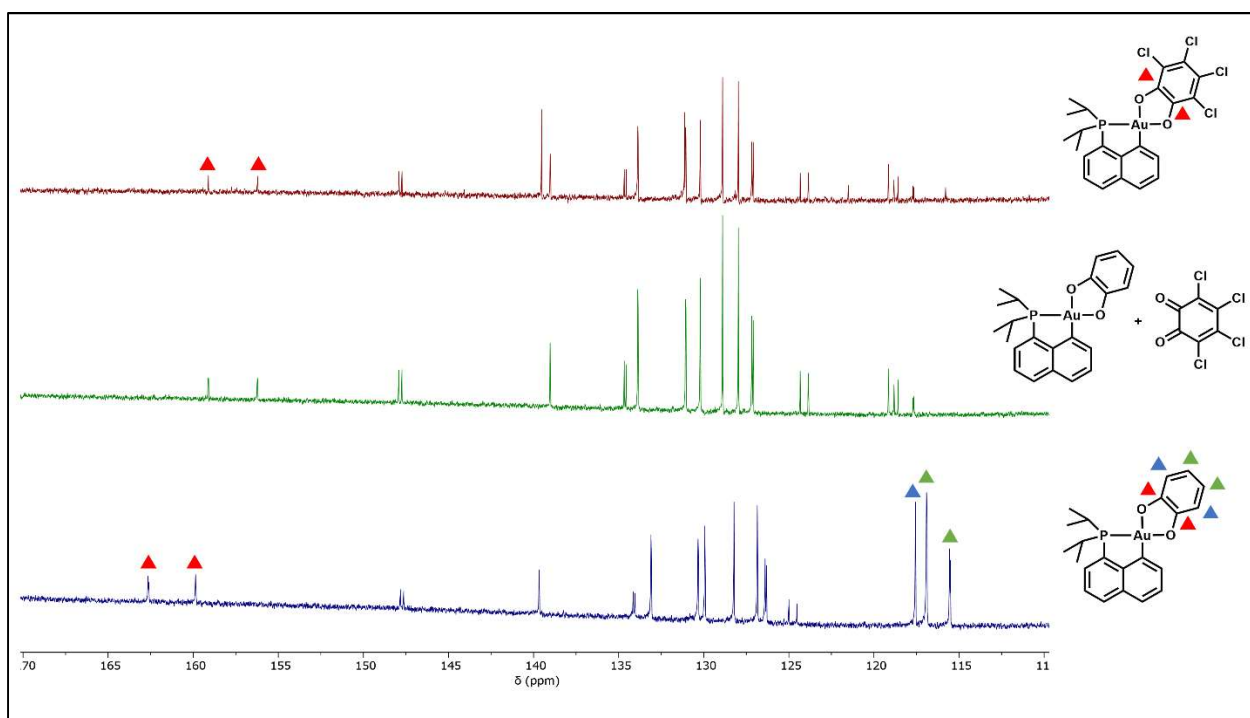

**Figure S49.**  $^{13}\text{C}\{^1\text{H}\}$  NMR spectra of the reaction of **3a** with **4d**.

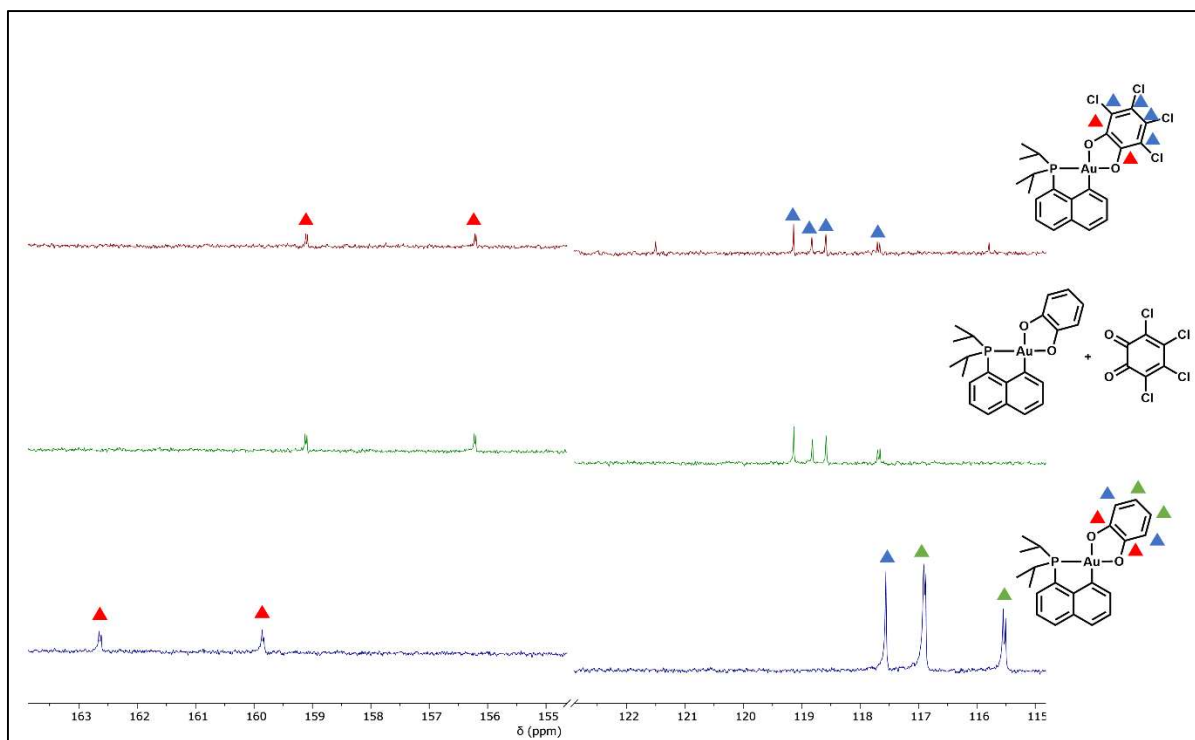

**Figure S50.**  $^{13}\text{C}\{^1\text{H}\}$  NMR spectra of the reaction of **3a** with **4d**.

## 9.2 (P<sup>^C</sup>)Au(bis(*tert*-butyl)catechol) to (P<sup>^C</sup>)Au(tetrachlorocatechol)

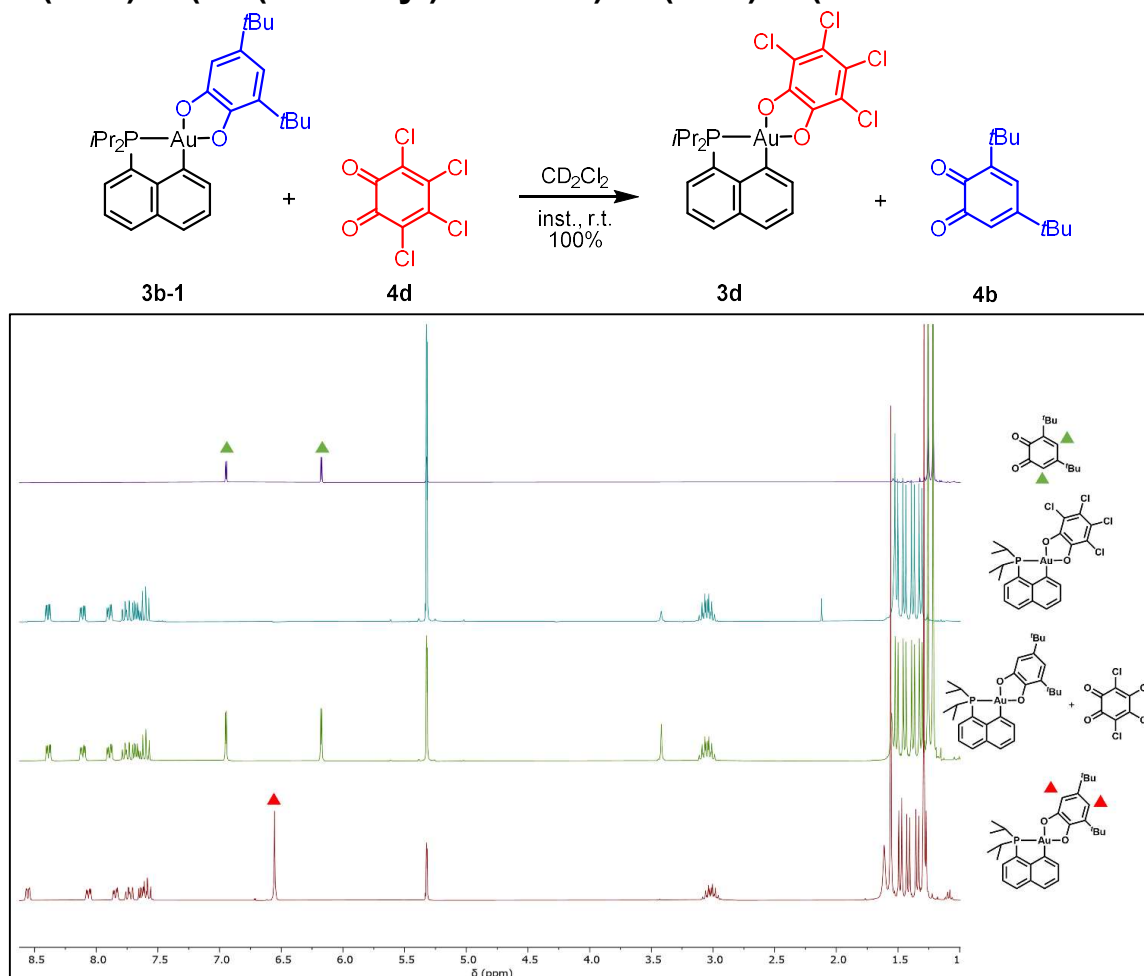

Figure S51.  $^1\text{H}$  NMR spectra of the reaction of **3b-1** with **4d**.

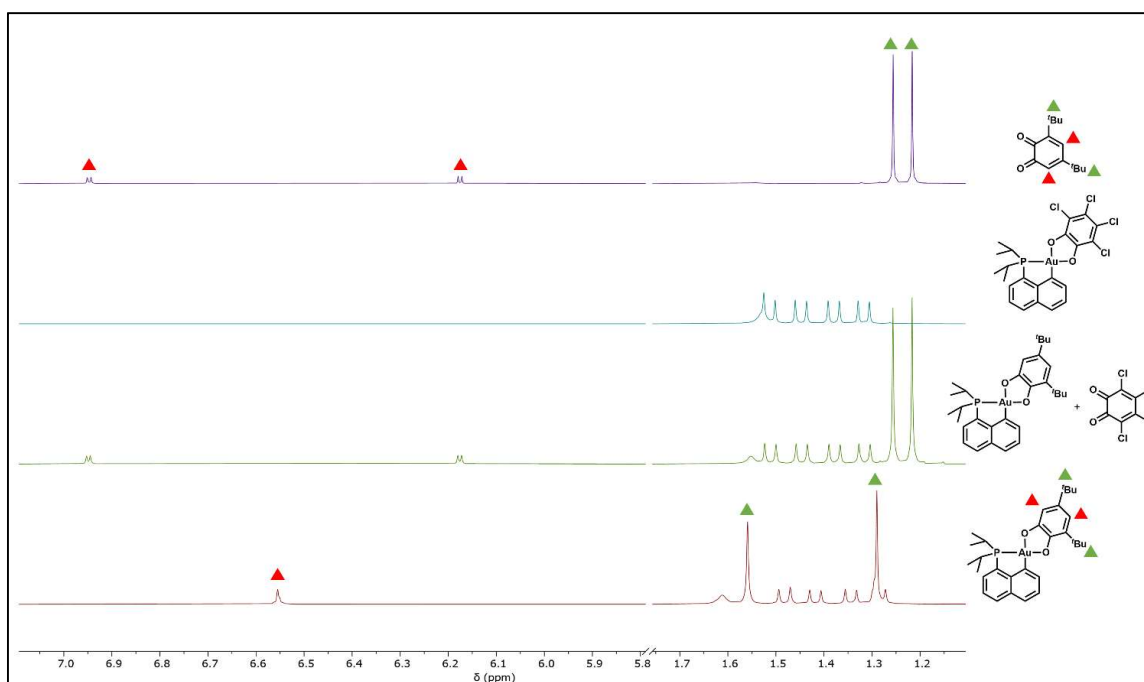

Figure S52.  $^1\text{H}$  NMR spectra of the reaction of **3b-1** with **4d**.

9.3 (P<sup>^</sup>C)Au(bis(*tert*-butyl)catechol) to (P<sup>^</sup>C)Au(4,5-dichlorocatechol)

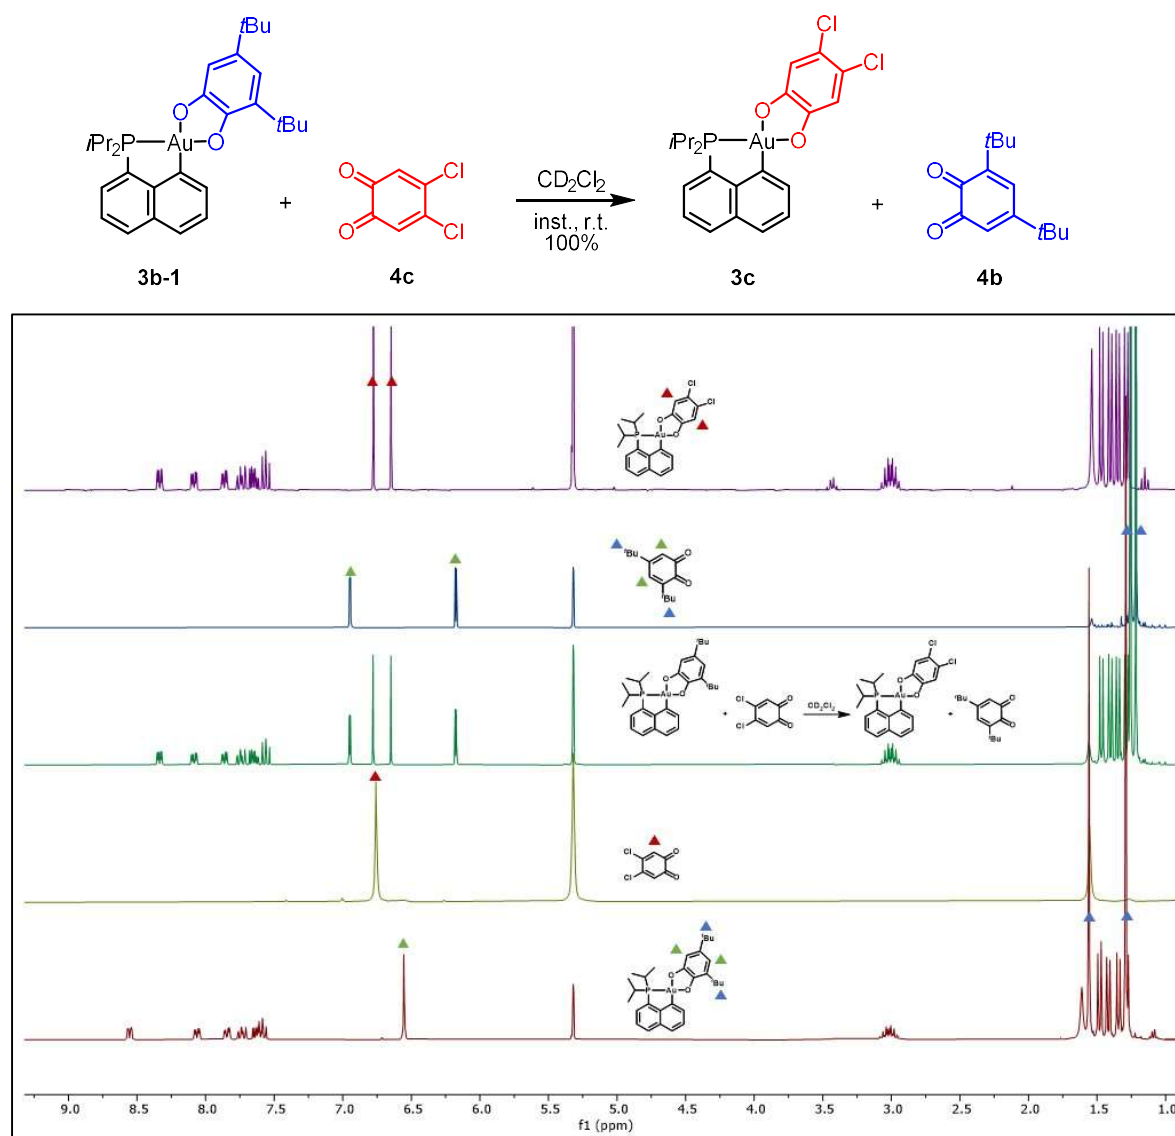

Figure S53. <sup>1</sup>H NMR spectra of the reaction of **3b-1** with **4c**.

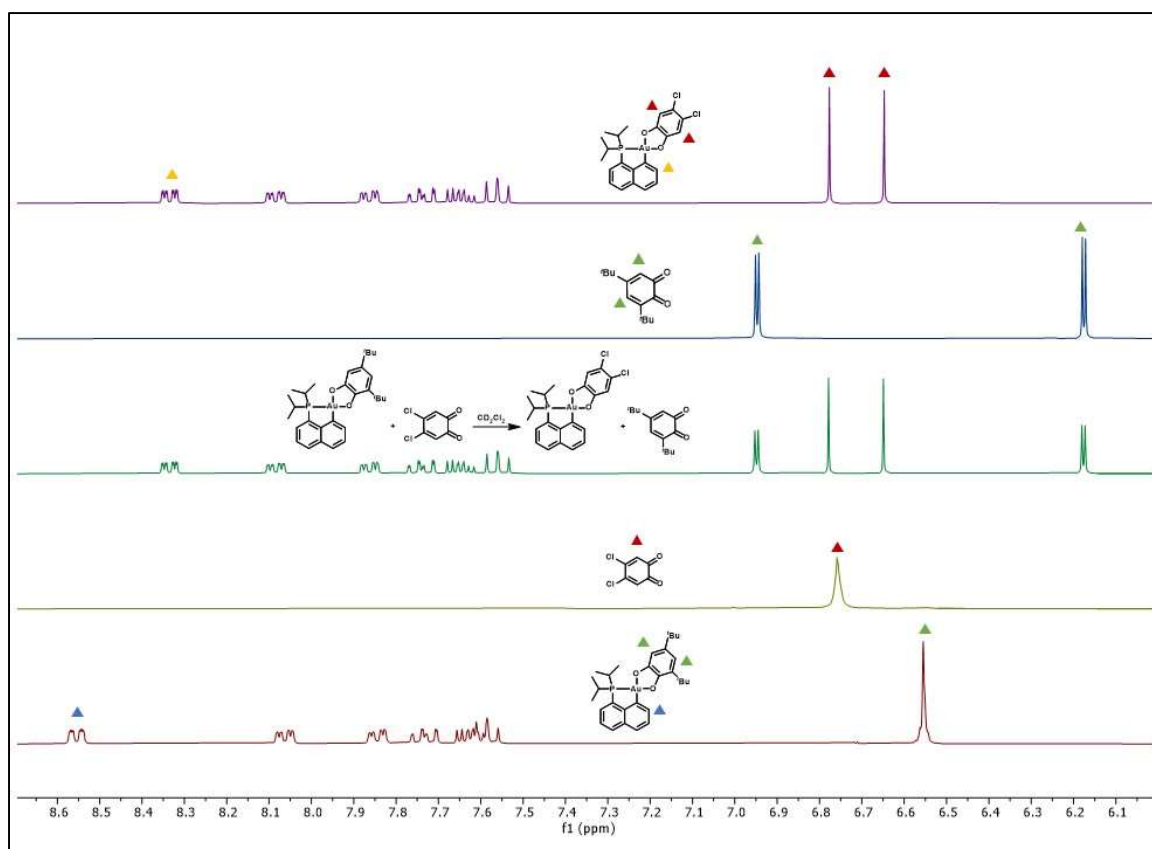

Figure S54.  $^1\text{H}$  NMR spectra of the reaction of **3b-1** with **4c**.

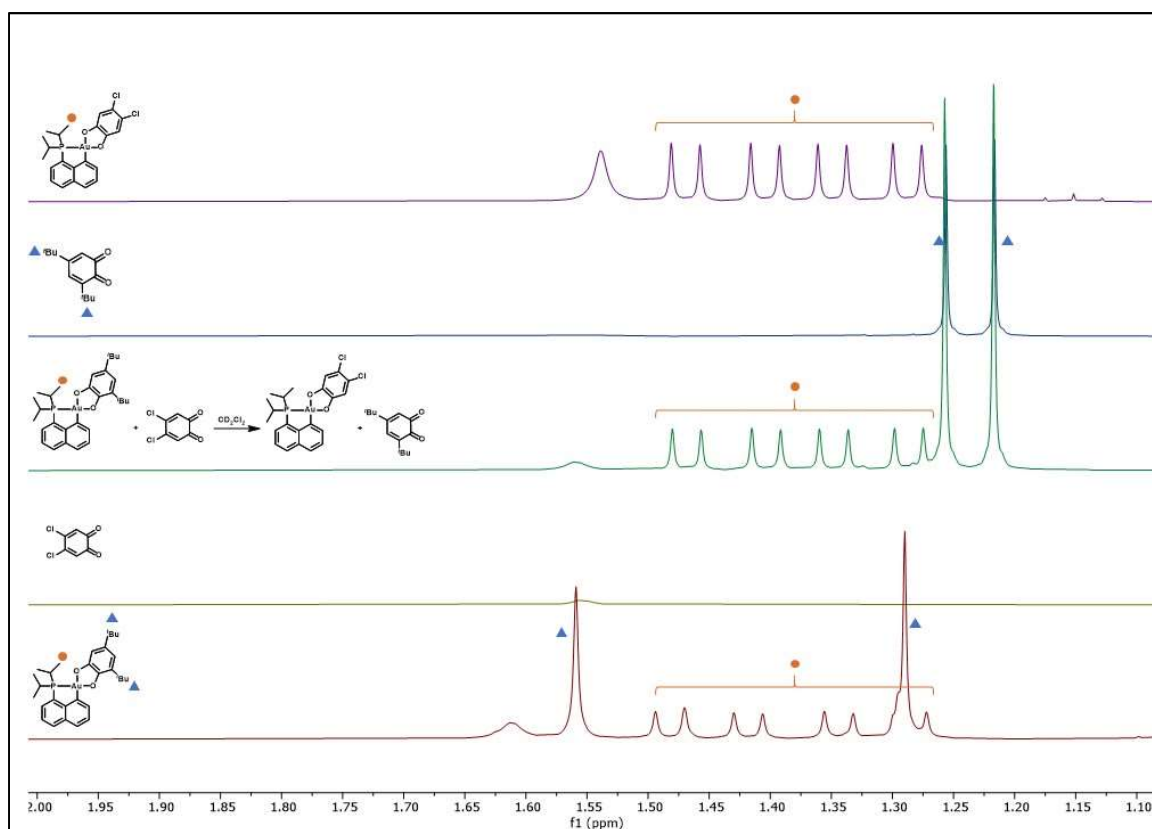

Figure S55.  $^1\text{H}$  NMR spectra of the reaction of **3b-1** with **4c**.

## P<sup>^</sup>P Systems

### 9.4 (P<sup>^</sup>P)Au(pyrocatechol) to (P<sup>^</sup>P)Au(tetrachlorocatechol)

To a solution of P<sup>^</sup>CAu catecholates **7a** or **7b** (0.01 mmol) in CD<sub>2</sub>Cl<sub>2</sub> (250 μL) a solution of benzoquinone **4c** or **4d** (0.01 mmol, 1 equiv.) was added in CD<sub>2</sub>Cl<sub>2</sub> (250 μL). The mixture was placed in an NMR tube and <sup>1</sup>H NMR spectrum was recorded immediately. As representative example, the exchange between **7a** and **4d**, was also monitored using <sup>13</sup>C{<sup>1</sup>H} NMR.

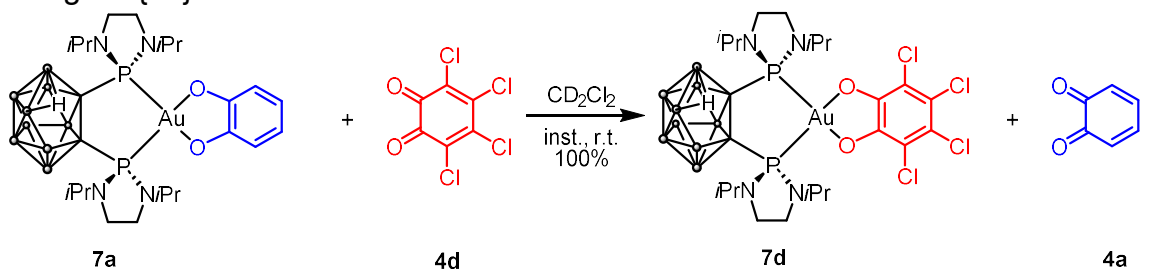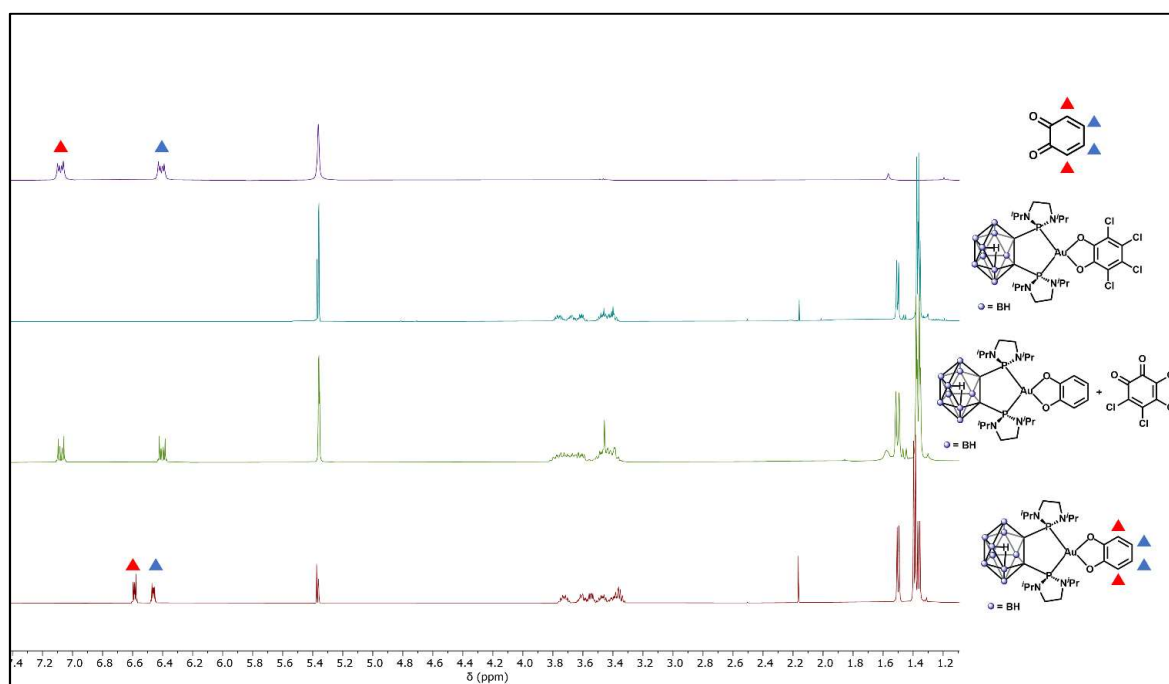

Figure S56. <sup>1</sup>H NMR spectra of the reaction of **7a** with **4d**.

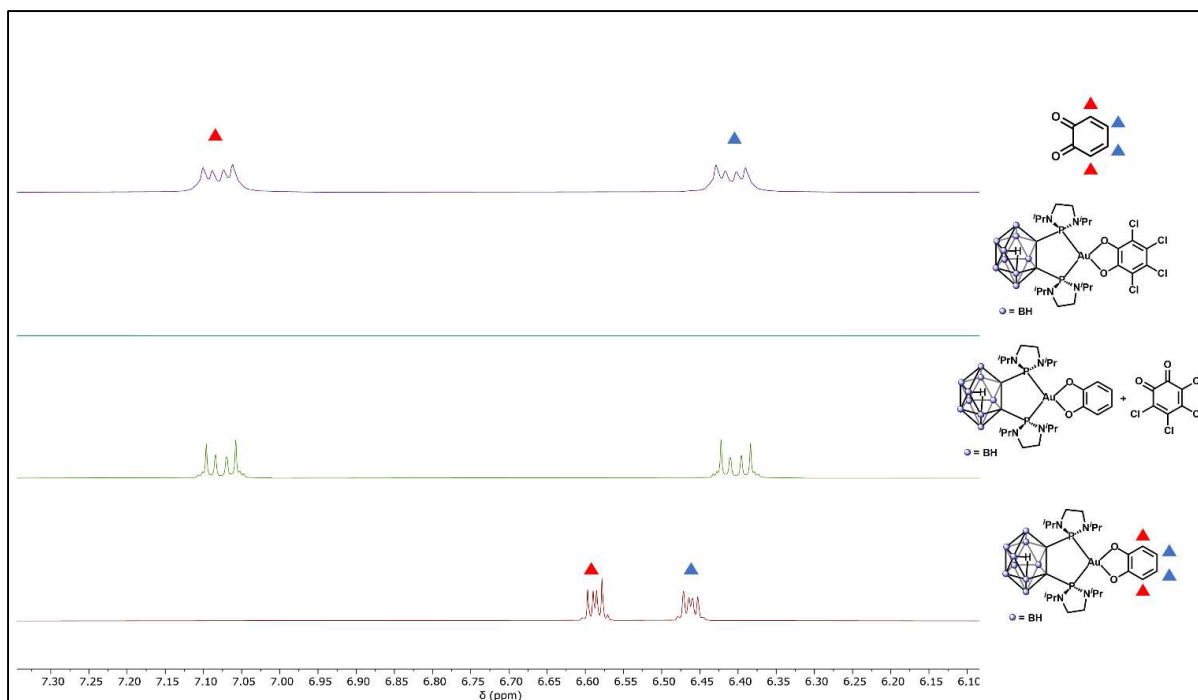

**Figure S57.**  $^1\text{H}$  NMR spectra of the reaction of **7a** with **4d**.

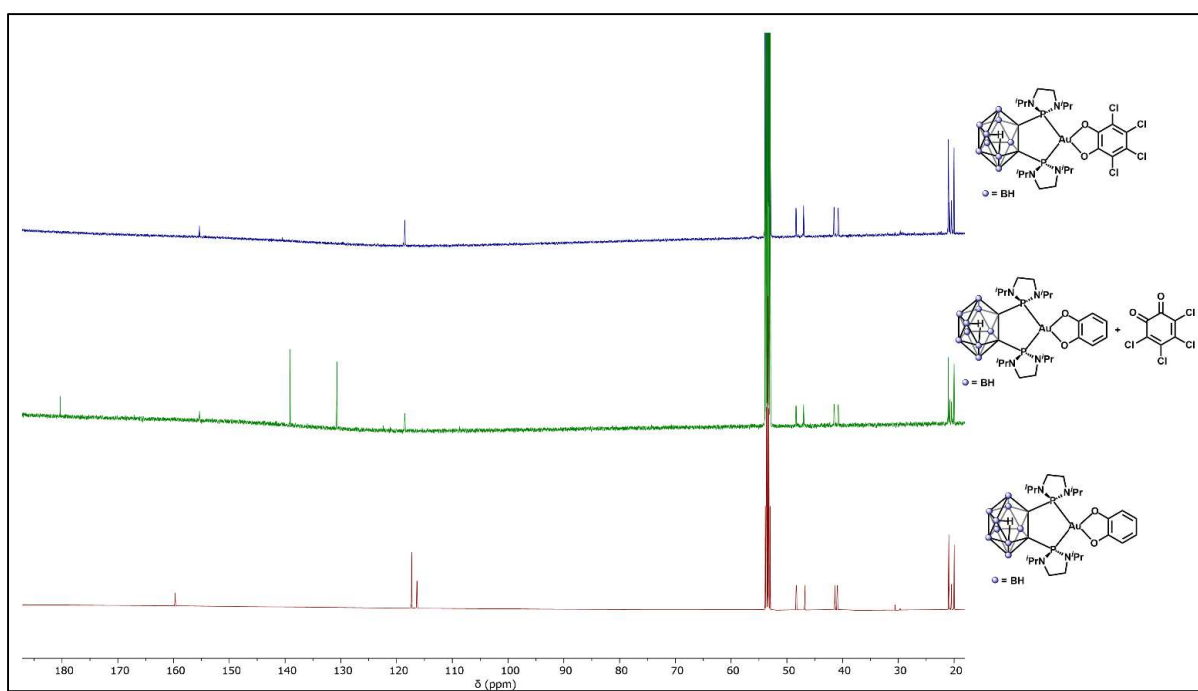

**Figure S58.**  $^{13}\text{C}\{^1\text{H}\}$  NMR spectra of the reaction of **7a** with **4d**.



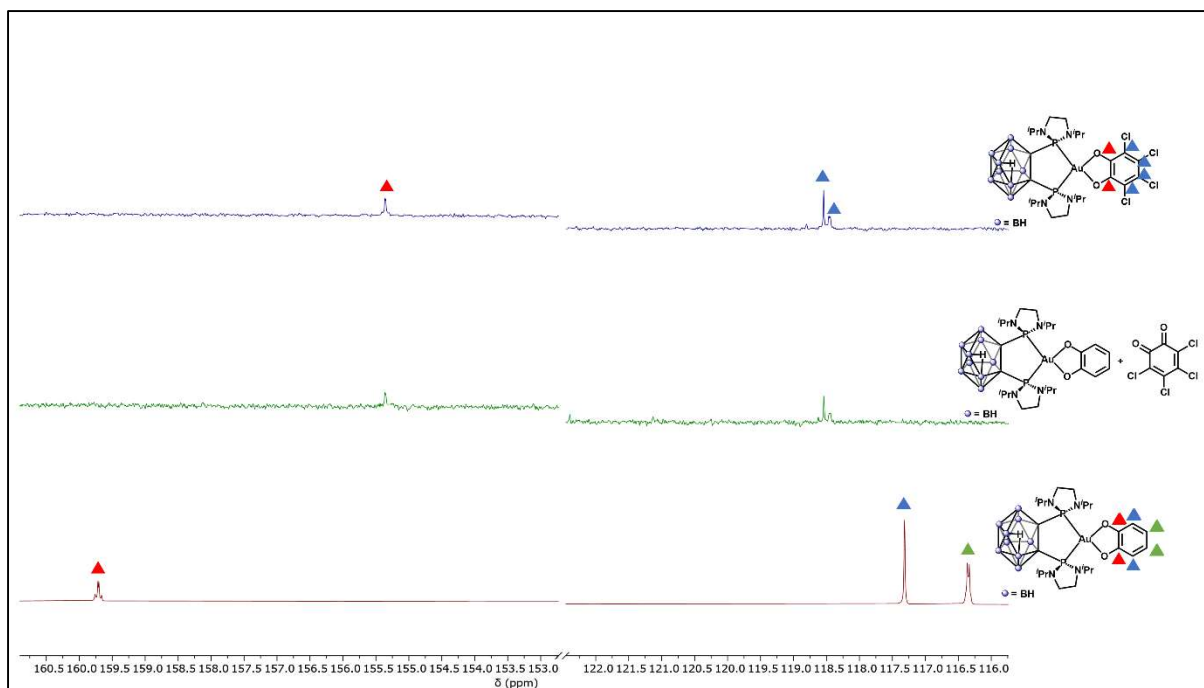

**Figure S59.**  $^{13}\text{C}\{^1\text{H}\}$  NMR spectra of the reaction of **7a** with **4d**.

## 9.5 (P<sup>^</sup>P)Au(bis(*tert*-butyl)catechol) to (P<sup>^</sup>P)Au(tetrachlorocatechol)

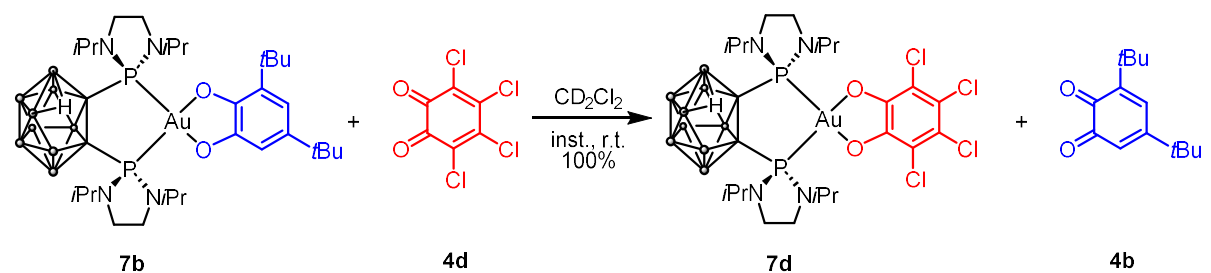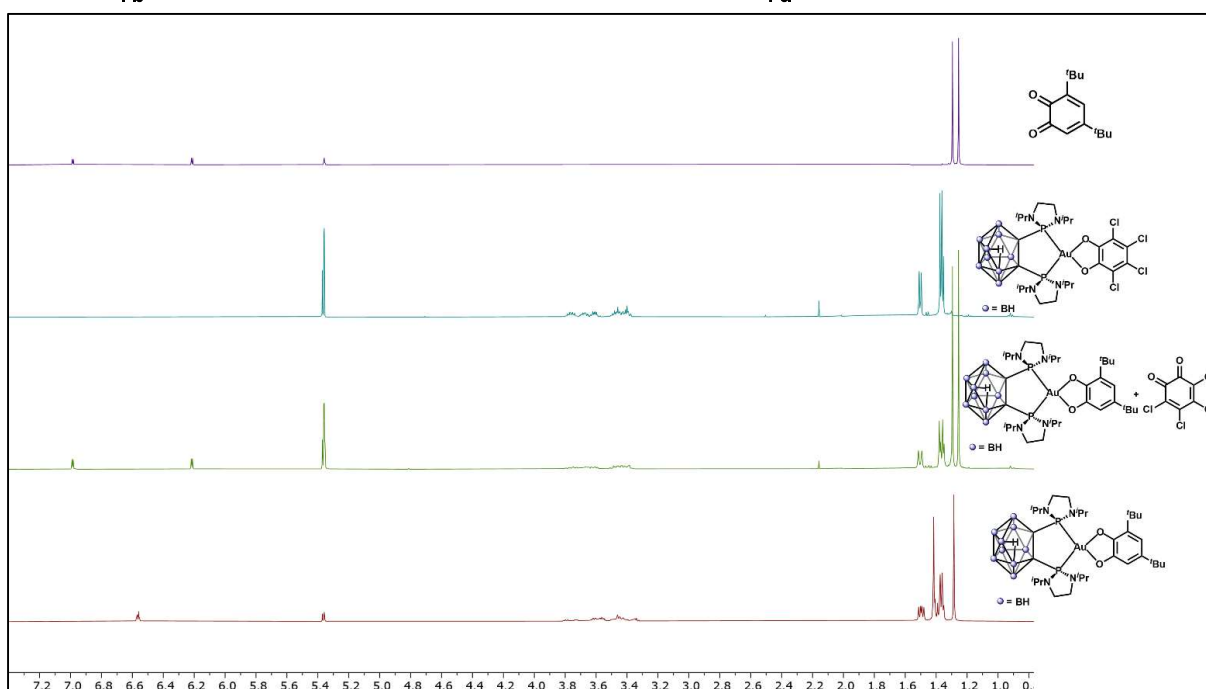

**Figure S60.** <sup>1</sup>H NMR spectra of the reaction of **7b** with **4d**.

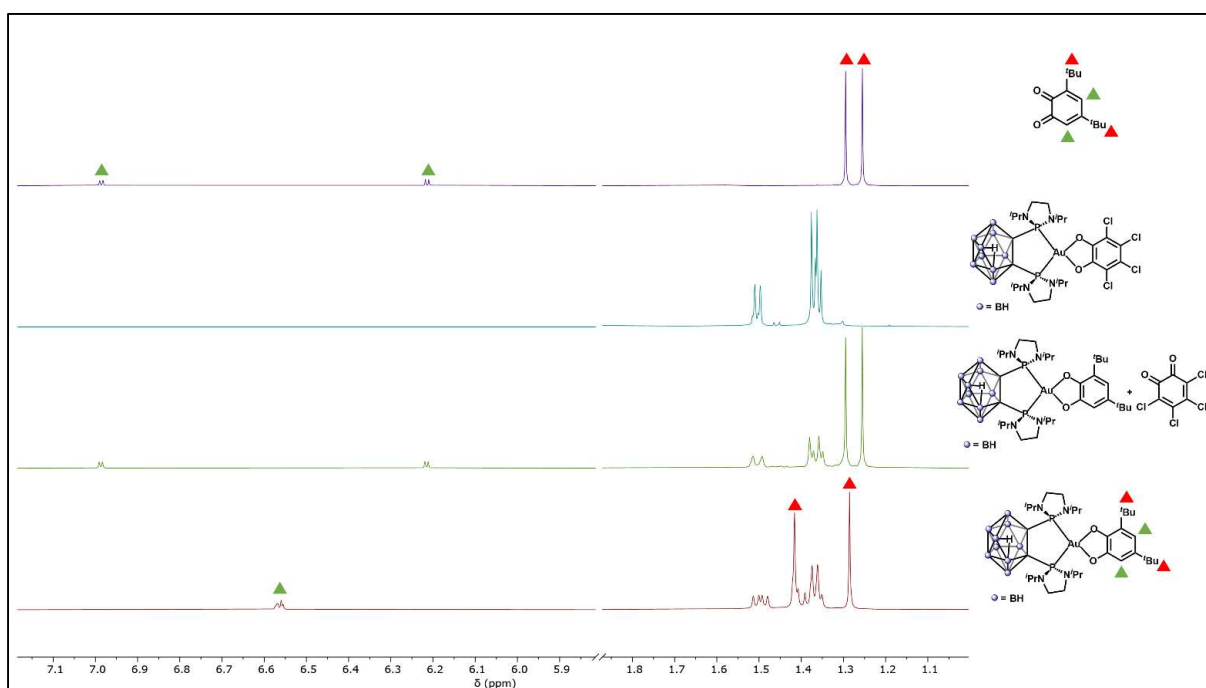

**Figure S61.** <sup>1</sup>H NMR spectra of the reaction of **7b** with **4d**.

## 9.6 (P<sup>^</sup>P)Au(bis(*tert*-butyl)catechol) to (P<sup>^</sup>P)Au(4,5-dichlorocatechol)

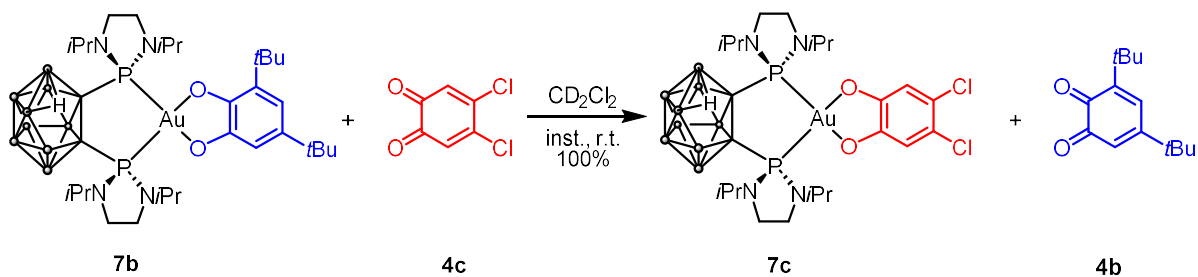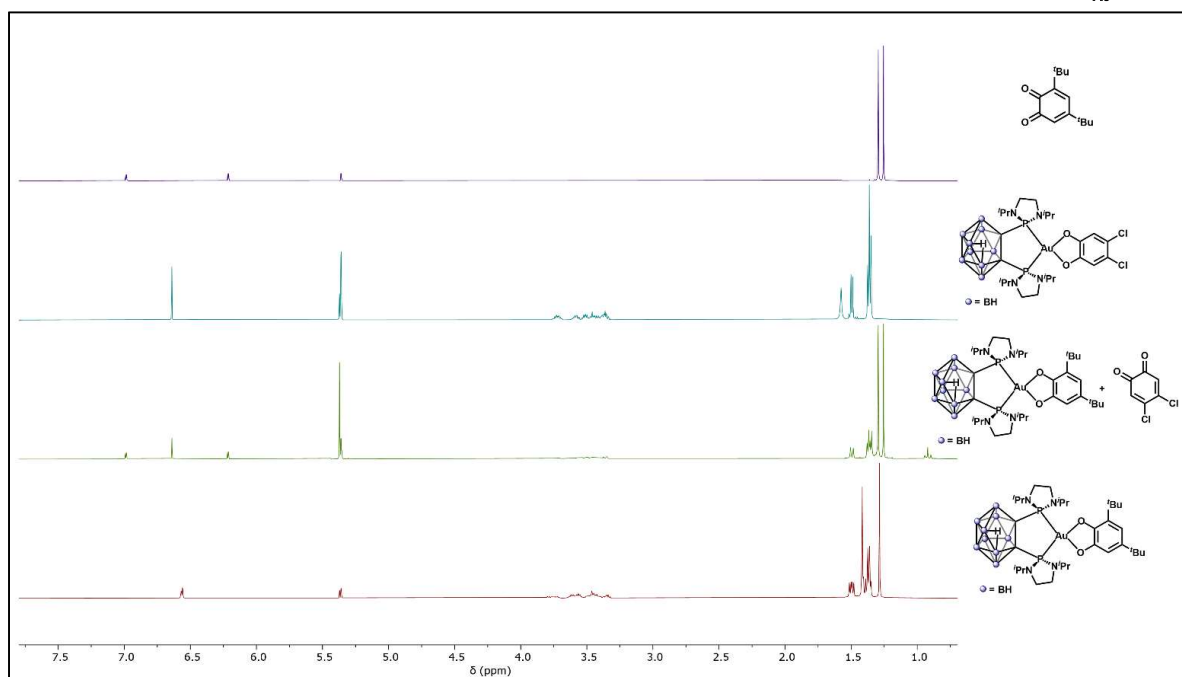

**Figure S62.** <sup>1</sup>H NMR spectra of the reaction of **7b** with **4c**.

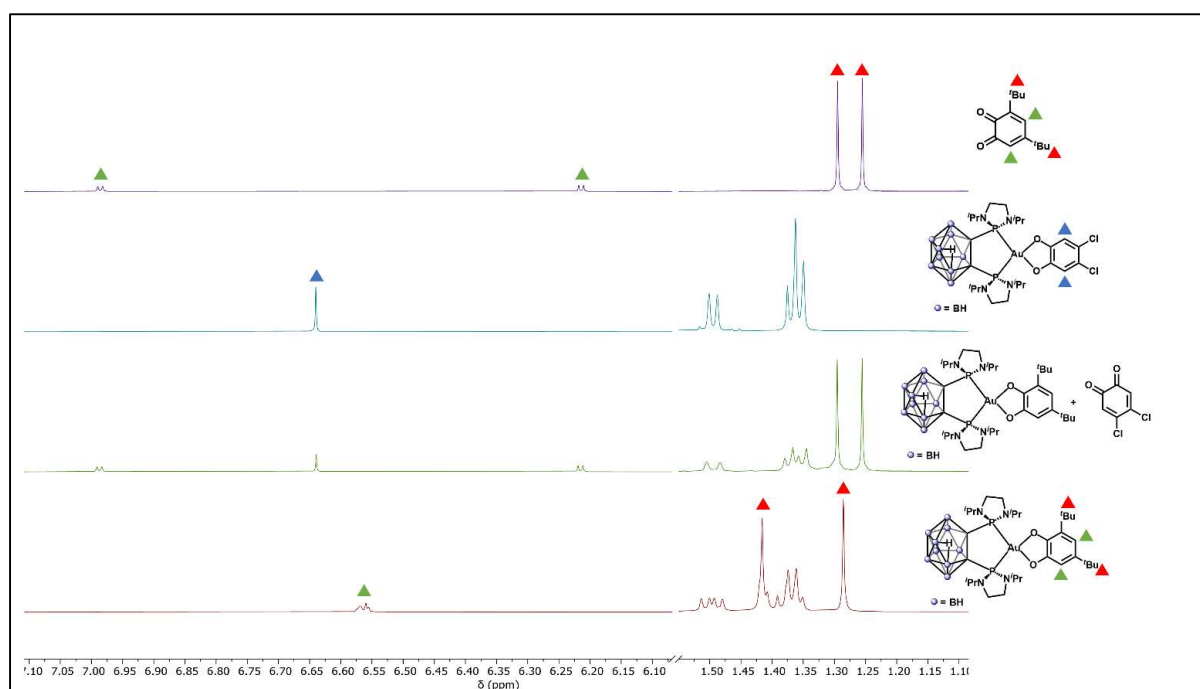

**Figure S63.** <sup>1</sup>H NMR spectra of the reaction of **7b** with **4c**.

## 9.7 Variable temperature catechol exchange experiment (VT-NMR)

A solution of (P<sup>^C</sup>)Au catechololate (**3a**) (0.01 mmol, 1 equiv.) in CD<sub>2</sub>Cl<sub>2</sub> (250 μL) was placed in an NMR tube and frozen in liquid N<sub>2</sub>. A solution of **4d** (0.01 mmol, 1 equiv.) in CD<sub>2</sub>Cl<sub>2</sub> (250 μL) was then cooled down to -80 °C and added over the previous solution. The mixture was quickly placed in the NMR machine previously cooled down to -80 °C. The tube was left inside the machine at -80 °C for one minute before <sup>1</sup>H NMR was recorded (Figure S64).

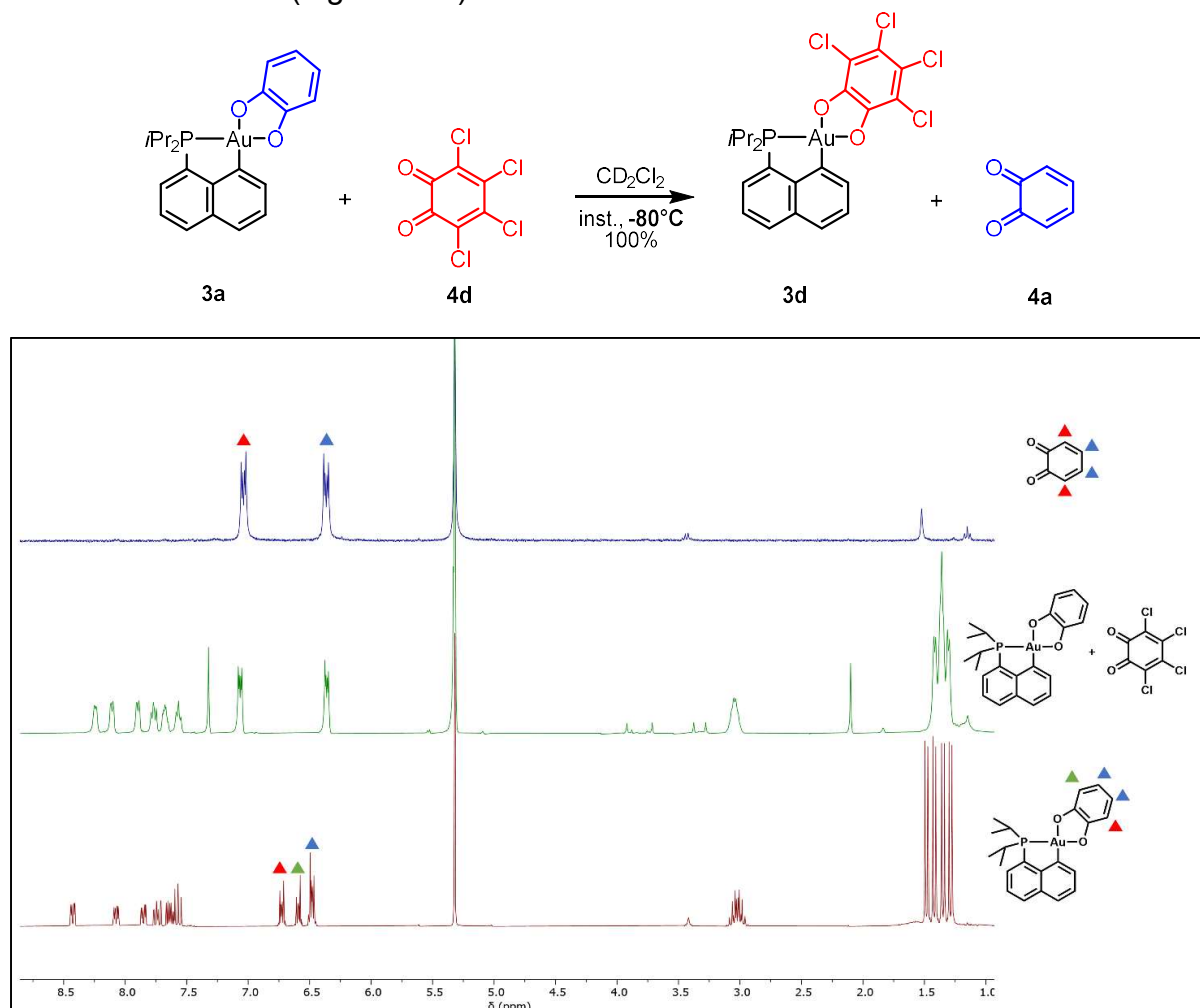

Figure S64. <sup>1</sup>H NMR spectra of the reaction of **3a** with **4d** at -80 °C.

A solution of (*P*<sup>^C</sup>)Au catechololate (**3a**) (0.01 mmol) in CD<sub>2</sub>Cl<sub>2</sub> (250 μL) was placed in an NMR tube and cooled to -100 °C. A solution of **4c** (0.01 mmol, 1 equiv.) in CD<sub>2</sub>Cl<sub>2</sub> (250 μL) was then added very slowly over the previous solution. At the interface of the two solutions a dark green colour appeared (see image below). The mixture was quickly placed in the NMR machine (with a previously precooled probe: -100 °C). The temperature of the sample was let to raise to -90 °C and after a proton NMR was recorded. Then the temperature was raised by 10 °C and a new proton NMR was recorded. This was repeated until -30 °C. This VT-NMR experiment shows, that the products (**3c** and **4a**) start to form even at -80 °C, they become the major species in the mixture at -60 °C and the reaction is complete at -40 °C (Figure S65).

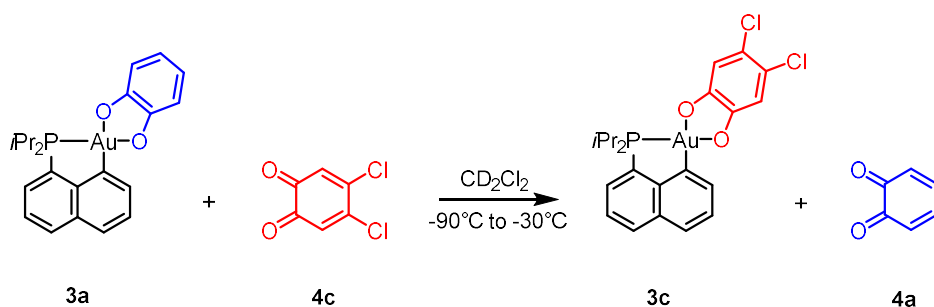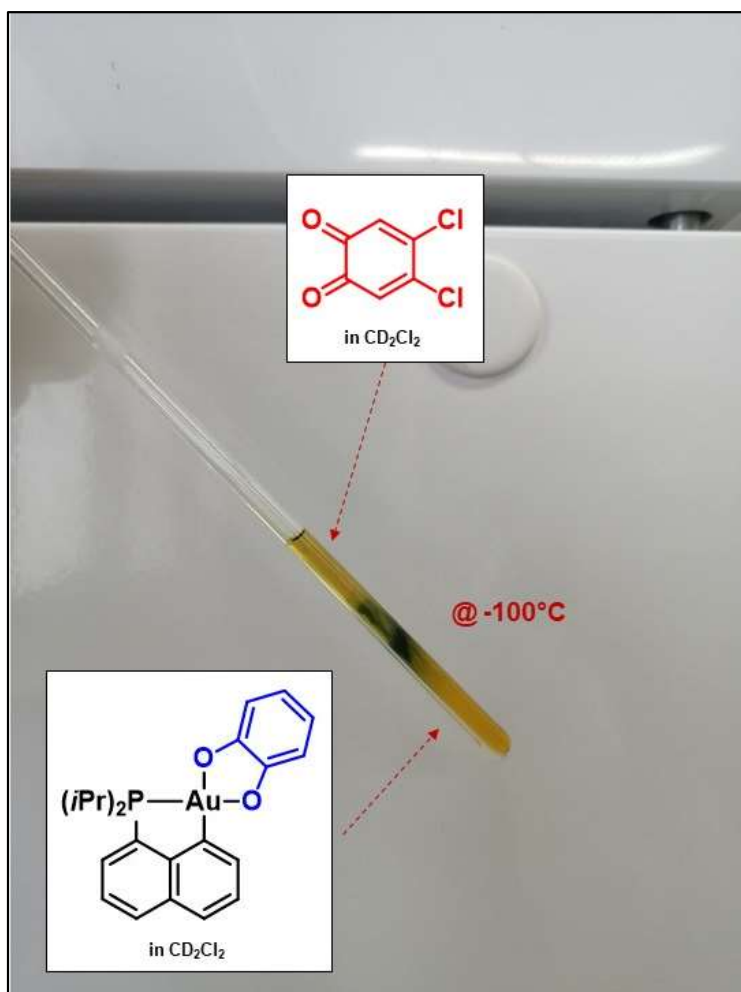

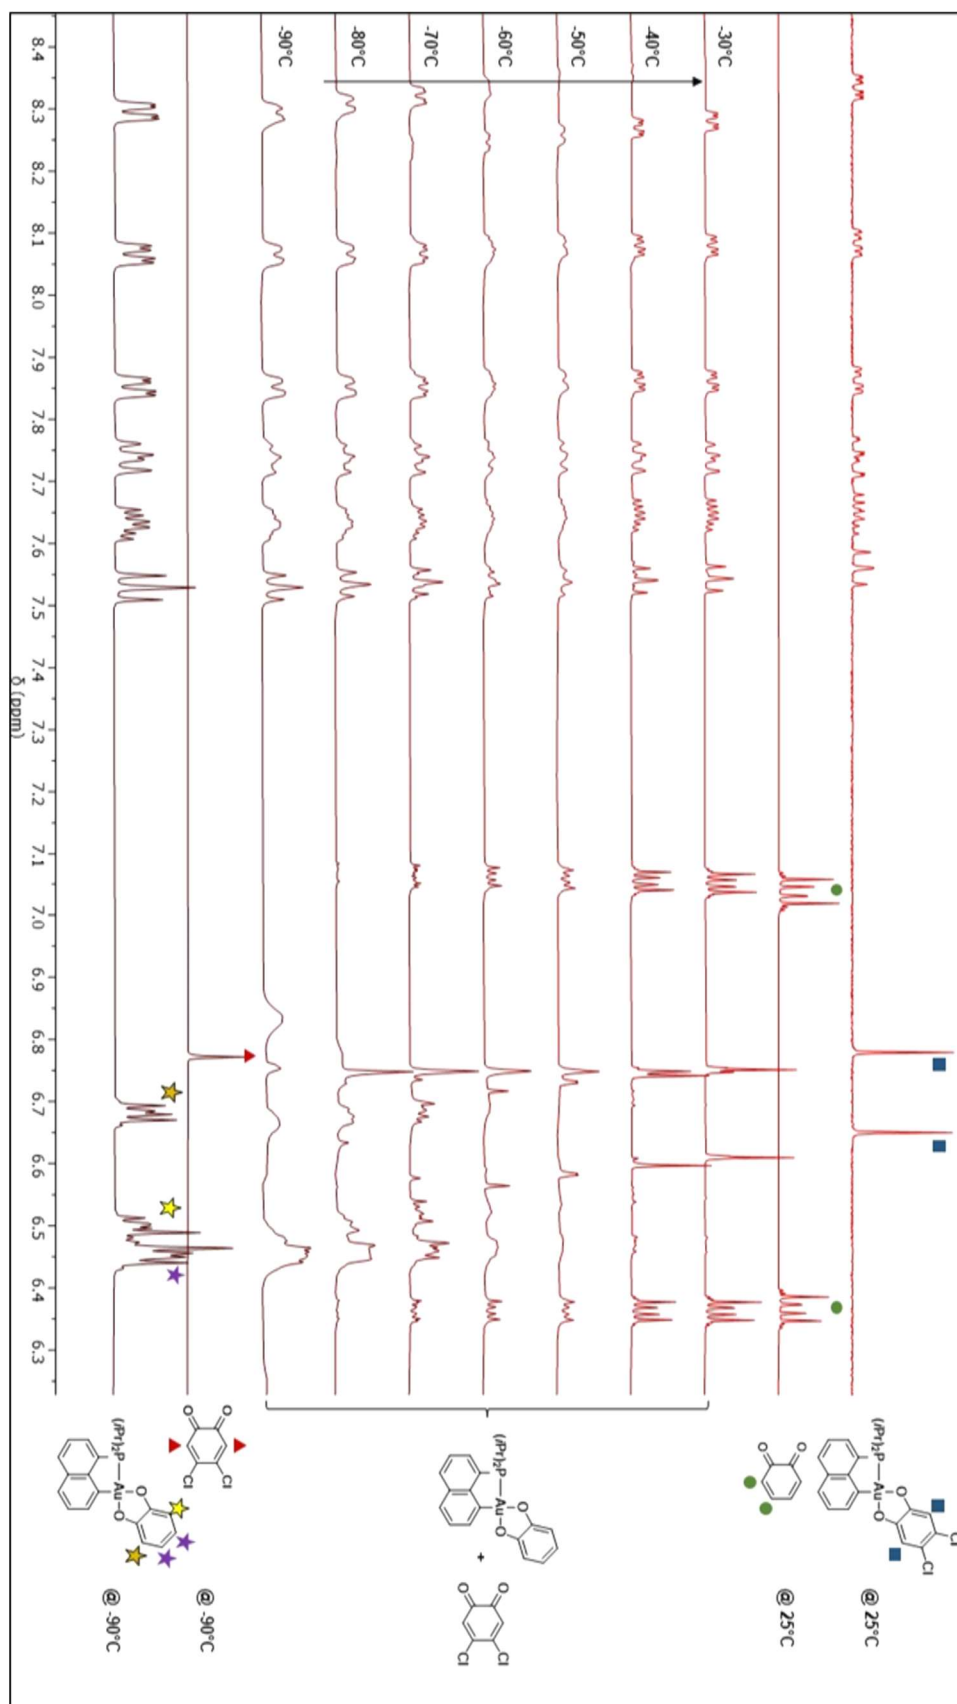

**Figure S65.**  $^1\text{H}$  VT-NMR spectra of the reaction of **3a** with **4c** ( $-90^\circ\text{C}$  to  $-30^\circ\text{C}$ ).

## 9.8 Low temperature catechol exchange experiment (VT UV-vis)

A solution of (P<sup>^</sup>C)Au catecholate (**3a**) (0.015 mmol, 10<sup>-2</sup>M) in CH<sub>2</sub>Cl<sub>2</sub> (1.5 mL) was placed in a cuvette and cooled to -100°C. Then a solution of **4c** (1 equiv., 10<sup>-2</sup>M) in CH<sub>2</sub>Cl<sub>2</sub> (1.5 mL) was added very slowly over the previous solution. Then the cuvette was quickly placed in a precooled (190K) optical cryostat. After 20 minutes the UV spectrum was recorded, that revealed a broad absorption band with a maximum at 745 nm, that could be attributed to a charge-transfer complex. The UV spectra was then consecutively recorded at 200K, 210K and 220K (Figure S66), that revealed the decrease of the absorption maximum.

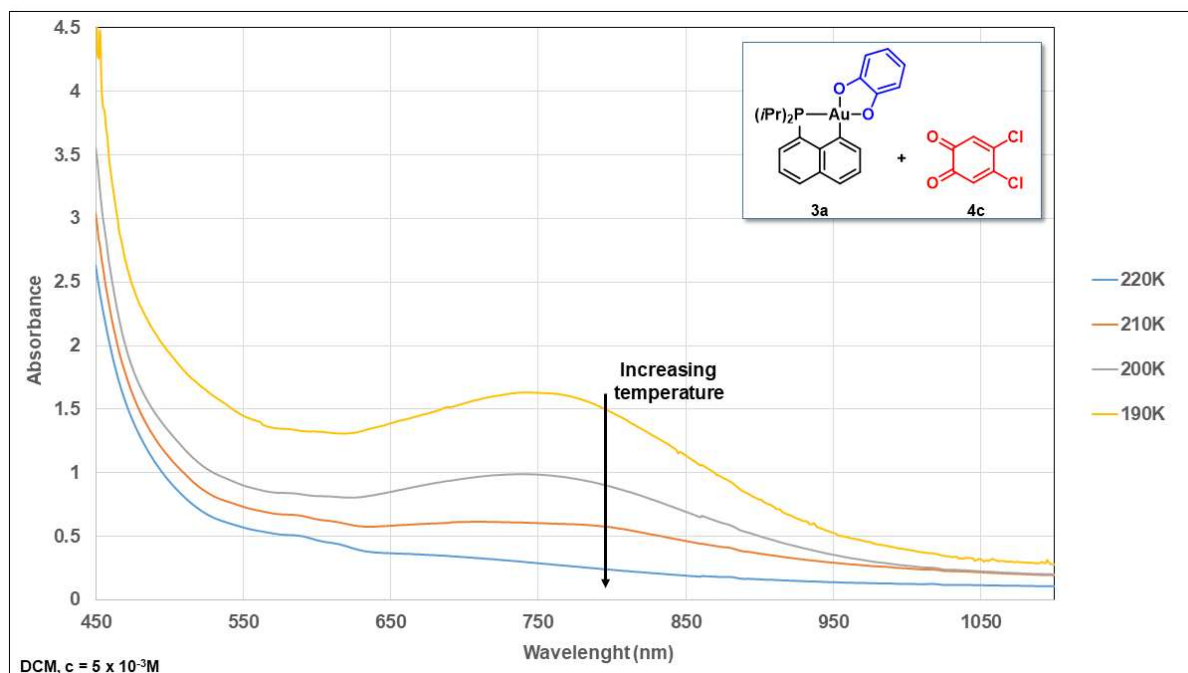

**Figure S66.** VT UV-vis spectra of the reaction of **3a** with **4c** (190K to 220K).

## 10. EPR analyses

### 10.1 Room Temperature EPR experiments

A mixture of catecholates (**3a** or **3b** or **3d**) (0.005 mmol) and (**4a** or **4b** or **4d**) (0.005 mmol) were dissolved in dry  $\text{CH}_2\text{Cl}_2$  (0.3 ml) inside the glovebox and placed in an EPR tube. The EPR spectra of the mixture was recorded immediately at room temperature.

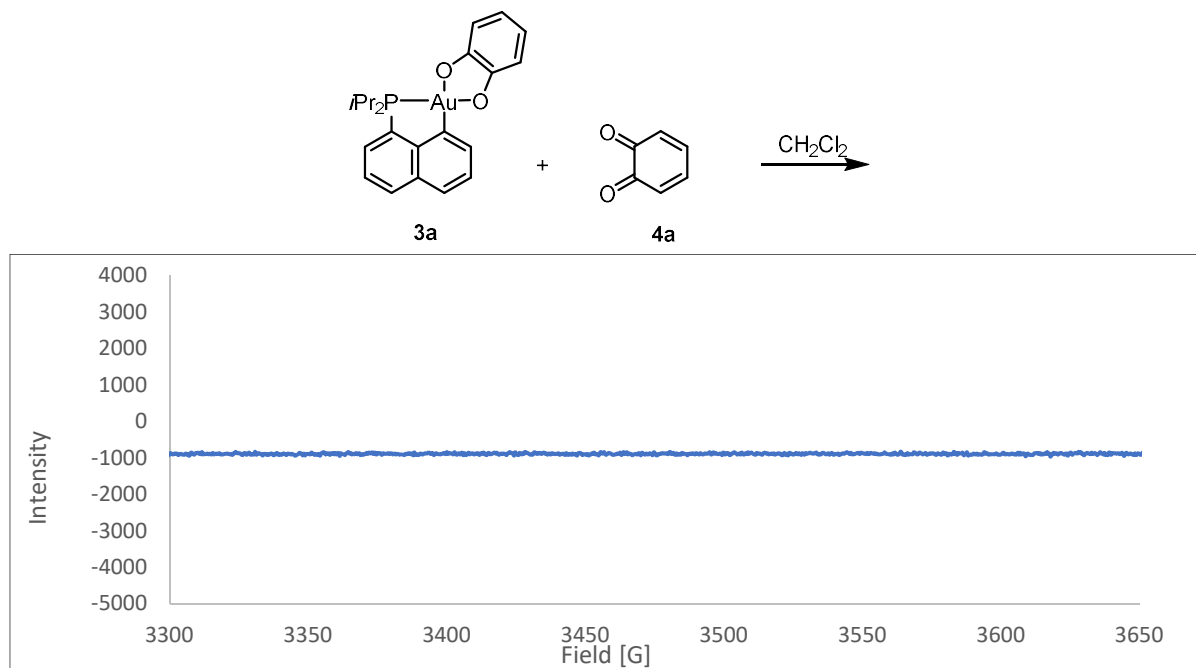

**Figure S67.** EPR spectrum of **3a** in the presence of **4a**.

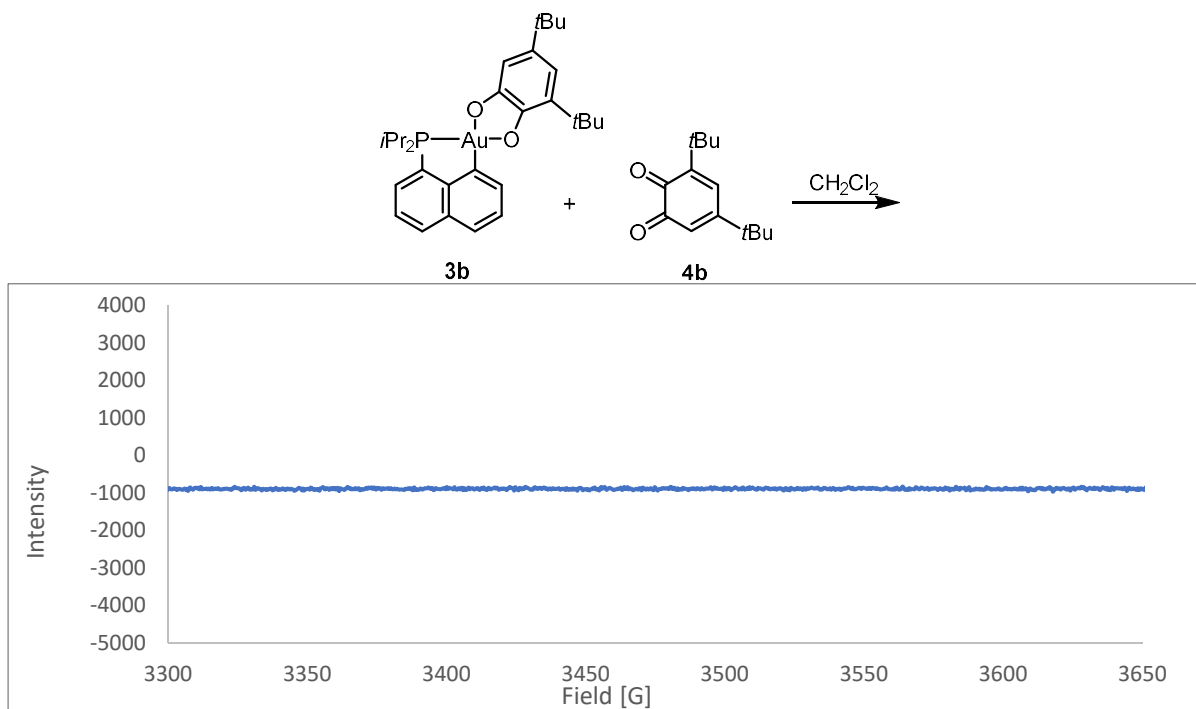

**Figure S68.** EPR spectrum of **3b** in the presence of **4b**.



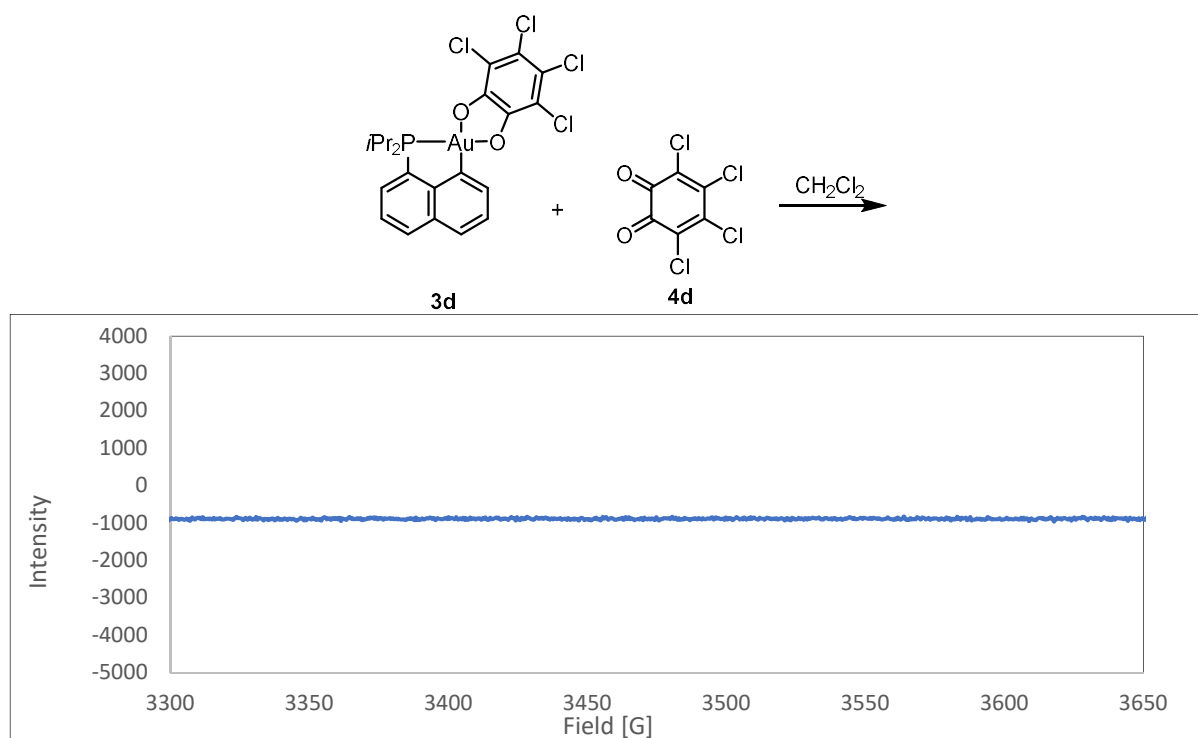

**Figure S69.** EPR spectrum of **3d** in the presence of **4d**.

## 10.2 Low Temperature EPR experiment

A solution of (P<sup>^</sup>C)Au catecholates (**3a**) (0.01 mmol) in CH<sub>2</sub>Cl<sub>2</sub> (250 μL) was placed in an EPR tube and cooled to -100°C. A solution of **4c** (0.01 mmol, 1 equiv.) in CH<sub>2</sub>Cl<sub>2</sub> (250 μL) was then added very slowly over the previous solution. Then the tube was shaken outside of the cooling bath to give a homogeneous deep green solution (see image below), that was immediately replaced into the bath. Then EPR spectra was recorded at 150K. (Figure S69).

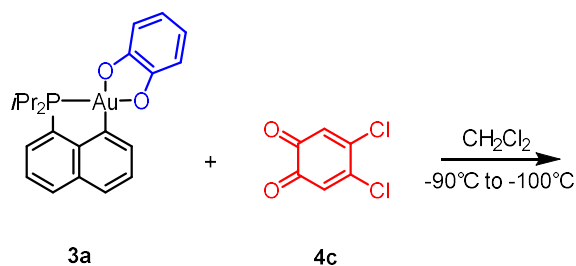

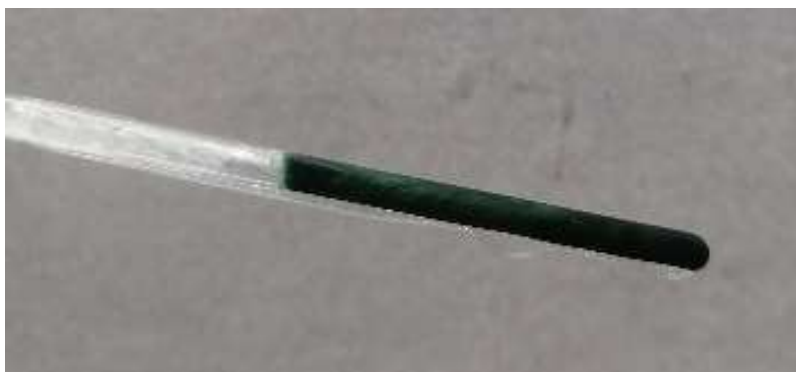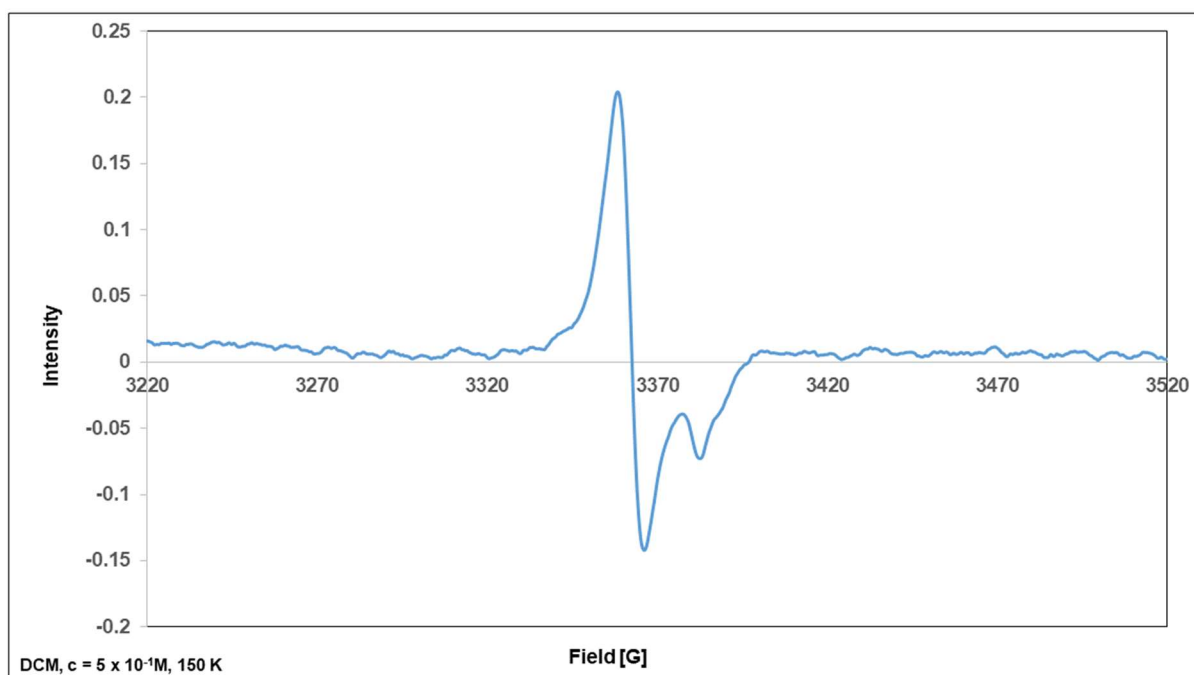

**Figure S70.** EPR spectrum of **3a** in the presence of **4c** at 150K.

## 11. Metrical parameters for the P<sup>^</sup>C gold(III) complexes

The <sup>31</sup>P NMR signals (85.6 - 95.6 ppm) are found in the typical region of gold(III) coordinated naphthalenyl diisopropylphosphine complexes.<sup>[6]</sup> XRD analyses confirmed the square planar geometry of the gold center ( $\tau_4 = 0.02 - 0.04$ ).<sup>[7]</sup> In addition, the C-O / C=C distances and MOS<sup>[8]</sup> values are clearly indicative for the catecholate moiety in the -2 oxidation state, which supports the gold(III) assignment.

|                             | <b>3a</b> | <b>3b</b> | <b>3c</b> | <b>3d</b> |
|-----------------------------|-----------|-----------|-----------|-----------|
| <b><sup>31</sup>P (ppm)</b> | 88.7      | 85.6      | 92.0      | 95.6      |
| $\tau_4$                    | 0.04      | 0.03      | 0.02      | 0.04      |
| <b>C=O (Å)</b>              | 1.357(4)  | 1.358(4)  | 1.341(11) | 1.330(3)  |
|                             | 1.355(4)  | 1.363(5)  | 1.347(12) | 1.341(3)  |
| <b>C-C (Å)</b>              | 1.410(5)  | 1.406(5)  | 1.414(13) | 1.417(4)  |
| <b>MOS</b>                  | -2.03(4)  | -1.96(8)  | -1.90(4)  | -1.82(7)  |

**Table S1.** <sup>31</sup>P NMR values and key geometric parameters (Å) of complexes **3a-d**.

## 12. Crystallographic data

Crystallographic data were collected at low temperature (193(2) K) on a Bruker APEX II Quazar diffractometer equipped with a 30 W air-cooled microfocus source using MoK $\alpha$  radiation ( $\lambda = 0.71073 \text{ \AA}$ ) for **3a** and **7a**, and on a Bruker D8 VENTURE diffractometer equipped with a PHOTON III detector, using MoK $\alpha$  radiation ( $\lambda = 0.71073 \text{ \AA}$ ) or a microfocus source with CuK $\alpha$  radiation ( $\lambda = 1.54184 \text{ \AA}$ ) for **3d**, **3c**, **3b-2**, **7b** and **6**. Phi and Omega scans were performed for data collection. An empirical absorption correction was applied<sup>[9]</sup> and the structures were solved by intrinsic phasing method (ShelXT).<sup>[10]</sup> All non-hydrogen atoms were refined anisotropically by means of least-squares procedures on  $F^2$  with ShelXL.<sup>[11]</sup> All the hydrogen atoms were refined isotropically at calculated positions using a riding model. For **3b-2**, the SQUEEZE<sup>[12]</sup> function of PLATON was used to remove the electron density contribution of the highly disordered solvent molecules from the model.

CCDC 2332329 (**3a**), 2332332 (**3b-2**), 2332331 (**3c**), 2332330 (**3d**), 2332335 (**6**), 2332334 (**7a**) and 2332333 (**7b**) contain the supplementary crystallographic data for this paper. These data can be obtained free of charge from the Cambridge Crystallographic Data Centre.

Crystal Data, Data Collection, and Structure Refinement for **3a**, **3b-2**, **3c**, **3d**, **6**, **7a**, and **7b**.

| ID                                                                       | <b>3a</b>                                                                                   | <b>3d</b>                                                          | <b>3c</b>                                                             | <b>3b-2</b>                                                                                   | <b>7b</b>                                                                                                                                | <b>7a</b>                                                                                        | <b>6</b>                                                                                                              |
|--------------------------------------------------------------------------|---------------------------------------------------------------------------------------------|--------------------------------------------------------------------|-----------------------------------------------------------------------|-----------------------------------------------------------------------------------------------|------------------------------------------------------------------------------------------------------------------------------------------|--------------------------------------------------------------------------------------------------|-----------------------------------------------------------------------------------------------------------------------|
| formula                                                                  | C <sub>22</sub> H <sub>24</sub> AuO <sub>2</sub> P,<br>0.5(C <sub>4</sub> H <sub>8</sub> O) | C <sub>22</sub> H <sub>20</sub> AuCl <sub>4</sub> O <sub>2</sub> P | C <sub>22</sub> H <sub>22</sub> AuCl <sub>2</sub><br>O <sub>2</sub> P | C <sub>30</sub> H <sub>40</sub> AuO <sub>2</sub> P,<br>0.33(C <sub>4</sub> H <sub>10</sub> O) | C <sub>32</sub> H <sub>64</sub> AuB <sub>9</sub> N <sub>4</sub> O <sub>2</sub><br>P <sub>2</sub> , 0.5(CH <sub>2</sub> Cl <sub>2</sub> ) | C <sub>24</sub> H <sub>49</sub> AuB <sub>9</sub> N <sub>4</sub><br>O <sub>2</sub> P <sub>2</sub> | C <sub>18</sub> H <sub>45</sub> AuB <sub>9</sub> Cl<br><sub>2</sub> N <sub>4</sub> P <sub>2</sub> , CHCl <sub>3</sub> |
| <i>M<sub>r</sub></i>                                                     | 584.40                                                                                      | 686.12                                                             | 617.24                                                                | 685.02                                                                                        | 935.53                                                                                                                                   | 781.87                                                                                           | 864.05                                                                                                                |
| crystal system                                                           | orthorhombic                                                                                | orthorhombic                                                       | monoclinic                                                            | trigonal                                                                                      | monoclinic                                                                                                                               | monoclinic                                                                                       | monoclinic                                                                                                            |
| space group                                                              | <i>Pbcn</i>                                                                                 | <i>Pbca</i>                                                        | <i>P2<sub>1</sub>/c</i>                                               | <i>R</i> $\bar{3}$                                                                            | <i>P2<sub>1</sub>/n</i>                                                                                                                  | <i>P2<sub>1</sub></i>                                                                            | <i>C2/m</i>                                                                                                           |
| <i>a</i> (Å)                                                             | 15.7586(7)                                                                                  | 15.3901(11)                                                        | 10.7611(7)                                                            | 28.7347(9)                                                                                    | 11.279(4)                                                                                                                                | 9.5342(8)                                                                                        | 19.4759(13)                                                                                                           |
| <i>b</i> (Å)                                                             | 19.2635(7)                                                                                  | 15.6458(9)                                                         | 14.4997(9)                                                            | 28.7347(9)                                                                                    | 13.765(3)                                                                                                                                | 17.6708(15)                                                                                      | 17.3049(11)                                                                                                           |
| <i>c</i> (Å)                                                             | 14.1296(5)                                                                                  | 19.2140(11)                                                        | 13.7734(8)                                                            | 20.9068(10)                                                                                   | 29.733(9)                                                                                                                                | 10.3038(9)                                                                                       | 10.6632(6)                                                                                                            |
| $\alpha$ (°)                                                             | 90                                                                                          | 90                                                                 | 90                                                                    | 90                                                                                            | 90                                                                                                                                       | 90                                                                                               | 90                                                                                                                    |
| $\beta$ (°)                                                              | 90                                                                                          | 90                                                                 | 98.291(2)                                                             | 90                                                                                            | 94.479(14)                                                                                                                               | 95.660(2)                                                                                        | 102.725(2)                                                                                                            |
| $\gamma$ (°)                                                             | 90                                                                                          | 90                                                                 | 90                                                                    | 120                                                                                           | 90                                                                                                                                       | 90                                                                                               | 90                                                                                                                    |
| <i>V</i> (Å <sup>3</sup> )                                               | 4289.3(3)                                                                                   | 4626.6(5)                                                          | 2126.6(2)                                                             | 14949.7(12)                                                                                   | 4602(2)                                                                                                                                  | 1727.5(3)                                                                                        | 3505.5(4)                                                                                                             |
| <i>Z</i>                                                                 | 8                                                                                           | 8                                                                  | 4                                                                     | 18                                                                                            | 4                                                                                                                                        | 2                                                                                                | 4                                                                                                                     |
| $\rho_{\text{calc}}$ (g cm <sup>-3</sup> )                               | 1.810                                                                                       | 1.970                                                              | 1.928                                                                 | 1.370                                                                                         | 1.350                                                                                                                                    | 1.503                                                                                            | 1.637                                                                                                                 |
| $\mu$ (mm <sup>-1</sup> )                                                | 6.954                                                                                       | 17.004                                                             | 7.260                                                                 | 4.500                                                                                         | 3.356                                                                                                                                    | 4.38                                                                                             | 4.689                                                                                                                 |
| <i>F</i> (000)                                                           | 2288                                                                                        | 2640                                                               | 1192                                                                  | 6189                                                                                          | 1900                                                                                                                                     | 782                                                                                              | 1708                                                                                                                  |
| crystal size<br>(mm <sup>3</sup> )                                       | 0.08 x 0.06 x<br>0.04                                                                       | 0.20 x 0.20 x<br>0.04                                              | 0.18 x 0.10 x<br>0.04                                                 | 0.16 x 0.12 x<br>0.08                                                                         | 0.10 x 0.08 x<br>0.06                                                                                                                    | 0.18 x 0.10 x<br>0.08                                                                            | 0.10 x 0.08 x<br>0.06                                                                                                 |
| <i>T</i> /K                                                              | 193(2)                                                                                      | 193(2)                                                             | 193(2)                                                                | 193(2)                                                                                        | 193(2)                                                                                                                                   | 192(2)                                                                                           | 193(2)                                                                                                                |
| measd reflns                                                             | 45422                                                                                       | 79862                                                              | 145612                                                                | 127299                                                                                        | 51568                                                                                                                                    | 68579                                                                                            | 115453                                                                                                                |
| Unique reflns<br>( <i>R</i> <sub>int</sub> )                             | 5542<br>(0.0658)                                                                            | 4573 (0.0512)                                                      | 14871<br>(0.0355)                                                     | 7640 (0.0562)                                                                                 | 8416 (0.0478)                                                                                                                            | 14523 (0.0507)                                                                                   | 7561                                                                                                                  |
| Data/restraints/<br>parameters                                           | 5542 / 44 /<br>285                                                                          | 4573 / 0 / 276                                                     | 14871 / 0 /<br>257                                                    | 7640 / 76 /<br>388                                                                            | 8416 / 557 / 645                                                                                                                         | 14523 / 1 / 387                                                                                  | 7561 / 60 / 194                                                                                                       |
| GOF on <i>F</i> <sup>2</sup>                                             | 1.016                                                                                       | 1.120                                                              | 1.042                                                                 | 1.068                                                                                         | 1.199                                                                                                                                    | 1.024                                                                                            | 1.087                                                                                                                 |
| <i>R</i> <sub>1</sub> <sup>a</sup> [ <i>I</i> > 2 $\sigma$ ( <i>I</i> )] | 0.0245                                                                                      | 0.0219                                                             | 0.0153                                                                | 0.0294                                                                                        | 0.0710                                                                                                                                   | 0.0331                                                                                           | 0.0386                                                                                                                |
| w <i>R</i> <sub>2</sub> <sup>b</sup> [all<br>data]                       | 0.0508                                                                                      | 0.0534                                                             | 0.0373                                                                | 0.0766                                                                                        | 0.1619                                                                                                                                   | 0.0732                                                                                           | 0.1107                                                                                                                |

$$^a R_1 = \sum |F_o| - |F_c| / \sum |F_o|, \quad ^b wR_2 = [\sum [w(F_o^2 - F_c^2)^2] / \sum [w(F_o^2)]]^{1/2}.$$

### 13. Computational details

All calculations were performed on the real systems using the Gaussian 16 package<sup>[13]</sup> and the B3PW91 hybrid functional<sup>[14]</sup> with D3 dispersion correction of Grimme with Becke–Johnson damping (DFT-*D3(BJ)*).<sup>[15]</sup> All stationary points involved were fully optimized in the gas phase and by taking into account dichloromethane as solvent (DCM: CH<sub>2</sub>Cl<sub>2</sub>, optimization or single point calculations on the gas phase's geometry) by means of SMD model.<sup>[16]</sup> The gold atom was described with the relativistic electron core potential SDD and associated basis set,<sup>[17]</sup> augmented by a set of f-orbital polarization functions.<sup>[18]</sup> The 6-31G\*\* basis set was employed for all other atoms. Frequency calculations were undertaken to confirm the nature of the stationary points, yielding one imaginary frequency for transition states (TS), corresponding to the expected process, and all of them positive for *minima*. The connectivity of the transition states and their adjacent *minima* was confirmed by intrinsic reaction coordinate (IRC) calculations.<sup>[19]</sup>

In order to have better insight on the bonding situation in the intermediate **RC1**, Energy Decomposition Analysis (EDA)<sup>[20]</sup> was performed with Amsterdam Density Functional 2019.102 program package<sup>[21]</sup> at ZORA-BP86-D3/TZ2P level of theory on the geometries optimized from Gaussian 16 at B3PW91-D3(BJ)/SDD+f(Au) 6-31G\*\* (other atoms) level. This analysis is based on the EDA method of Morokuma and the ETS partitioning scheme of Ziegler and Rauk. The term  $\Delta E_{\text{int}}$  can be mainly decomposed into different contributions: (i) electrostatic interaction energy between the fragments ( $\Delta V_{\text{elstat}}$ ), (ii) destabilizing Pauli repulsion from interactions between electrons on either fragment with the same spin ( $\Delta E_{\text{Pauli}}$ ), (iii) stabilizing orbital interaction ( $\Delta E_{\text{orb}}$ ):

$$\Delta E_{\text{int}} = \Delta V_{\text{elstat}} + \Delta E_{\text{Pauli}} + \Delta E_{\text{orb}}$$

Hirshfield charges were also computed. To further characterize the interaction between the substrates and metal fragments in the transition states, the Natural Orbital Chemical Valence (NOCV) approach was used.<sup>[22]</sup> *ETS-NOCV* scheme combines *charge* rearrangement (NOCV) and bond energy *analysis*. It is a powerful tool to quantitatively *analyze* chemical bonds, combining the extended transition state (*ETS*) method for energy decomposition *analysis* combined with the natural orbitals for chemical valence (NOCV) theory. In this approach, the  $\Delta E_{\text{orb}}$  term is decomposed into the contributions from different natural orbitals of chemical valence (NOCV) eigenvalues ( $\lambda_i$ ) as follows:

$$\Delta E_{\text{orb}} = \sum_k \Delta E_{\text{orb}}^k = \sum_{k=1}^{M/2} v_k [-F_{-k,-k}^{\text{TS}} + F_{k,k}^{\text{TS}}]$$

where  $F_{k,k}^{\text{TS}}$  are diagonal Kohn-Sham matrix elements defined over NOCV with respect to the transition state (TS) density. The components  $\Delta E_{\text{orb}}^k$  provide energetic estimation of  $\Delta \rho^k$  and allow to characterize the importance of a particular electron flow channel for the bonding between considered molecular fragments.

Electrostatic Potential map (ESP) has also been computed at B3PW91-D3(BJ)/SDD+f (Au), 6-31G\*\* (other atoms) level of theory. 3D DFT ESP maps were generated for the **RC1** complex and the two fragments, the (P,C)Au(O,O) complex and the 3,4,5,6-tetrachloro 1,2-benzoquinone in their ground state, using Gaussian16 software with 803 points, an isosurface of 0.02 and  $\pm 0.1$  kT/e. The ESP has been plotted using PyMOL (1.8.6.2) molecular graphic software.<sup>[23]</sup>

In the intermediate **INT**, the  $\pi$ - $\pi$  interaction was studied using Atoms-In Molecules analysis, QTAIM,<sup>[24]</sup> thanks to the AIMALL<sup>[25]</sup> software. The density  $\rho(r)$  was determined for the Bond Critical Points (BCP) associated to the  $\pi$ - $\pi$  interaction interactions between the 2 rings. Laplacian of the density  $\nabla^2\rho(r)$  indicates the regions where the density  $\rho(r)$  is depleted or concentrated. Delocalization bond indexes ( $\delta$ ) between the two main atoms involved in the  $\pi$ - $\pi$  interaction were also calculated.

For the energy profile of the catechol exchange reaction at gold(III) with tetra-chloro quinone, a benchmark of functionals was also realized, such as PBE0<sup>[26]</sup>-D3(BJ), TPSS<sup>[27]</sup>-D3(BJ), B97D<sup>[28]</sup>, M06<sup>[29]</sup>, CAM-B3LYP<sup>[30]</sup>-D3(BJ) and WB97XD<sup>[31]</sup>.

For the singlet state ( $S^0$ ) of the intermediate **INT**, optimizations have been carried out with restricted DFT (B3PW91-D3(BJ)) and unrestricted-DFT (UB3PW91-D3(BJ)) by means of the broken-symmetry formalism<sup>[32]</sup> using B3PW91-D3(BJ) functional.

The absorption spectrum of (P,C)Au(O,O)H<sub>4</sub> (**3a**) and (P,C)Au(O,O)Cl<sub>4</sub> (**3d**) were calculated at SMD(DCM)-CAM-B3LYP/SDD+f(Au), 6-31G\*\* (other atoms) level including the solvent on the geometry optimized at B3PW91-D3(BJ)/SDD+f(Au), 6-31G\*\* (other atoms) by using time-dependent density functional theory (TD-DFT)<sup>[33]</sup> method. Solvents effects (DCM: dichloromethane) were included by means of the universal Solvation Model based on Density (SMD).<sup>[34]</sup>

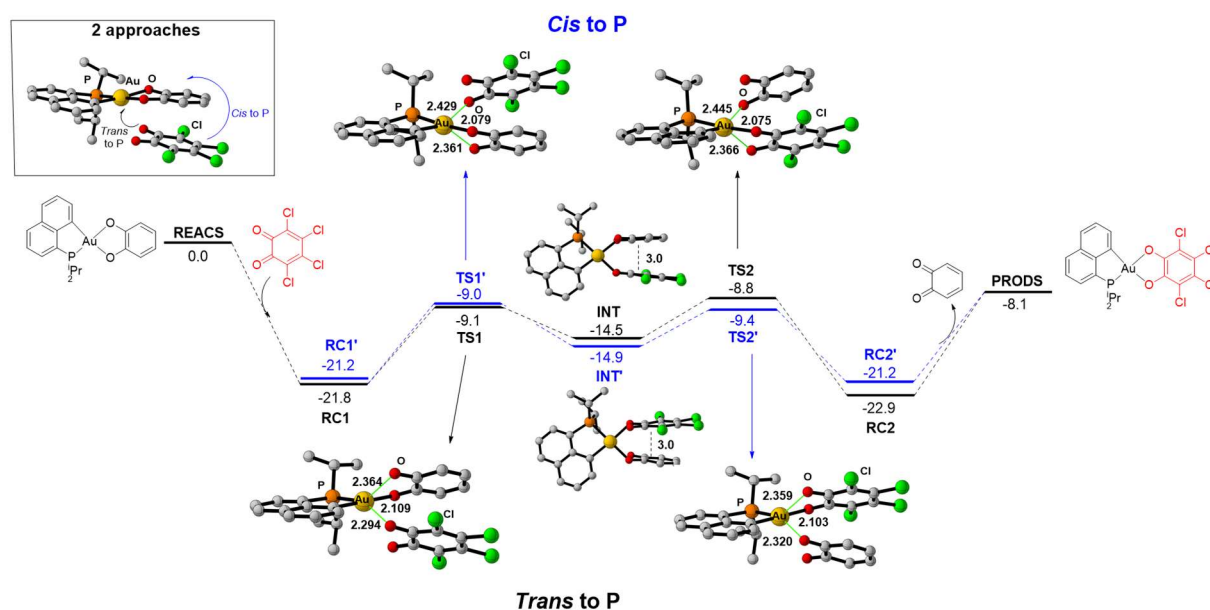

**Figure S71.** Energy profiles ( $\Delta G$  in kcal/mol) of the catechol exchange reaction at gold(III) computed at B3PW91-D3(BJ)/SDD+f(Au), 6-31G\*\* (other atoms) level of theory with the approach of 3,4,5,6-tetrachloro-1,2-benzoquinone in *trans* (black path) or *cis* (blue path) to P. Hydrogens omitted for clarity

Two approaches were considered for the reaction of the 3,4,5,6-tetrachloro-1,2-benzoquinone with the (P,C)Au(O,O) complex: *cis* or *trans* to P. The energy profiles were found to be very similar. The activation barriers are very close, with  $\Delta G1^\ddagger$  12.7 kcal/mol (*trans*) and 12.2 kcal/mol (*cis*) for the first Au–O bond exchange and  $\Delta G2^\ddagger$  13.0 kcal/mol (*trans*) and 11.8 kcal/mol (*cis*) for the second Au–O bond exchange.

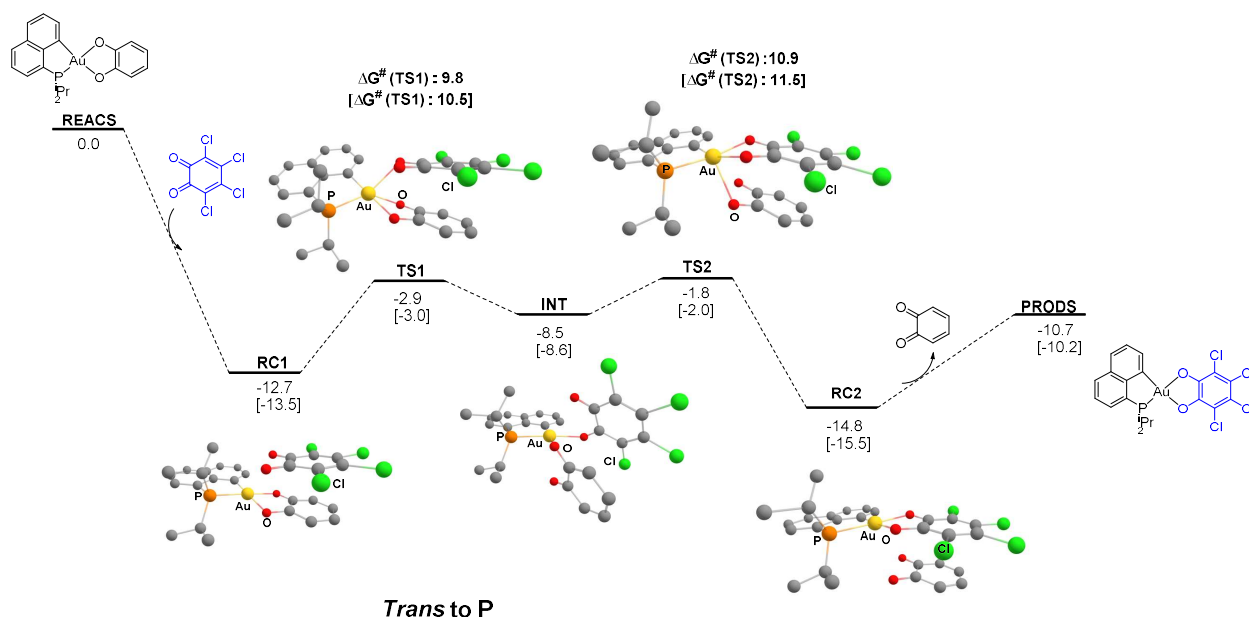

**Figure S72.** Energy profiles ( $\Delta G$  in kcal/mol) of the catechol exchange reaction at Gold(III) computed at SMD(DCM)-B3PW91-D3(BJ)/SDD+f(Au), 6-31G\*\* (other atoms)//B3PW91-D3(BJ)/SDD+f (Au), 6-31G\*\* (other atoms) level of theory. Displacement of Au–O bond *trans* to P. For comparison, into brackets are reported the values computed at SMD(DCM)-B3PW91-D3(BJ)/SDD+f(Au), 6-31G\*\* (other atoms). Hydrogens omitted for clarity.

In order to analyze the influence of the solvent (DCM: Dichloromethane), we computed the energy profile for the reaction of the 3,4,5,6-tetrachloro-1,2-benzoquinone with the (P,C)Au(O,O) complex (« *trans* to P » path) by including solvent upon optimization using SMD model or by single point calculations on the geometry optimized in gas phase. The two methodologies give very similar results. Comparison with the gas phase results has shown that in solvent all *minima* and transition states are shifted upwards. However, the activation barriers associated to the two Au–O bond exchanges are found very accessible and quite similar at  $\sim 10$  kcal/mol for **TS1** (12.7 kcal/mol in gas phase) and  $\sim 11.2$  kcal/mol for **TS2** (13.0 kcal/mol in gas phase).



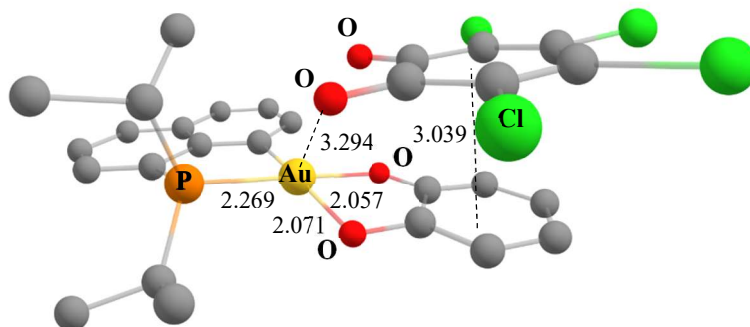

**Figure S73.** Main geometrical features for the charge transfer complex **RC1** computed at B3PW91-D3(BJ)/SDD+f(Au), 6-31G\*\* (other atoms). Distances in Å. Hydrogen omitted for clarity.

We can notice a  $\pi$ - $\pi$  stacking between the 2 rings with a distance between the centroids of each ring of 3.04 Å.

**Table S2.** Energy Decomposition Analysis (EDA) carried out at ZORA-BP86(D3)/TZ2VP for the complex **RC1**. Energies are in kcal/mol.

|                                       | <b>RC1</b>                     |
|---------------------------------------|--------------------------------|
| $\Delta E_{\text{Pauli}}$             | 59.88                          |
| $\Delta V_{\text{elstat}}$            | -34.89<br>(33.9%) <sup>a</sup> |
| $\Delta E_{\text{orb}}$               | -40.62<br>(39.5%) <sup>a</sup> |
| $\Delta E_{\text{disp}}$              | -27.32<br>(26.6%) <sup>a</sup> |
| $\Delta E_{\text{int}}$               | -42.96                         |
| $\Delta E_{\text{orb1}}(\rho)$        | -27.32                         |
| <b>Hirshfeld Charges</b> <sup>b</sup> | 0.42                           |

<sup>a</sup> Values into bracket (%) correspond to the percentage contribution to the total attractive interaction ( $\Delta V_{\text{elstat}} + \Delta E_{\text{orb}} + \Delta E_{\text{disp}}$ ).<sup>b</sup> Hirshfeld charges for (P,C)Au(O,O) fragment.

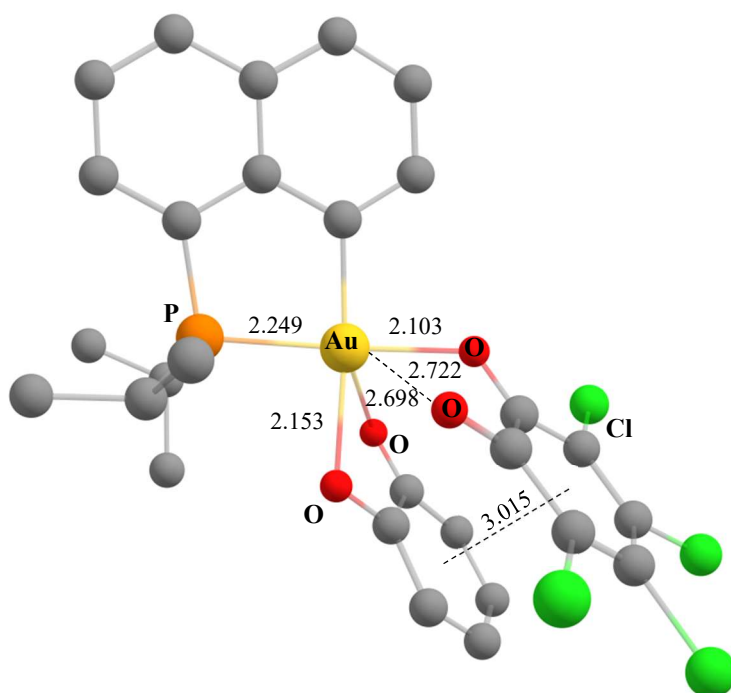

It is noteworthy that optimization of **INT** has been performed with restricted DFT (B3PW91-D3(BJ)) and unrestricted-DFT (UB3PW91-D3(BJ)) by means of the broken-symmetry formalism<sup>[32]</sup> using B3PW91-D3(BJ) functional. For the U-BS formalism, the optimized structures of the restricted singlet state or that of the triplet state calculations have been taken as input structures. In all cases, the optimizations converge to the same structure, *i.e.* that of the restricted DFT calculation.

**Figure S74.** Main geometrical features of complex **INT** in singlet state, with 3,4,5,6-tetrachloro 1,2-catecholate moiety in *trans* to P. Main distances in Å. Calculations carried out at B3PW91-D3(BJ)/SDD+f(Au), 6-31G\*\* (other atoms). Hydrogens omitted for clarity.

**Table S3.** AIM analysis for the complex **INT**. Calculations carried out at B3PW91-D3(BJ)/ SDD+f(Au),6-31G\*\*(other atoms) level of theory.

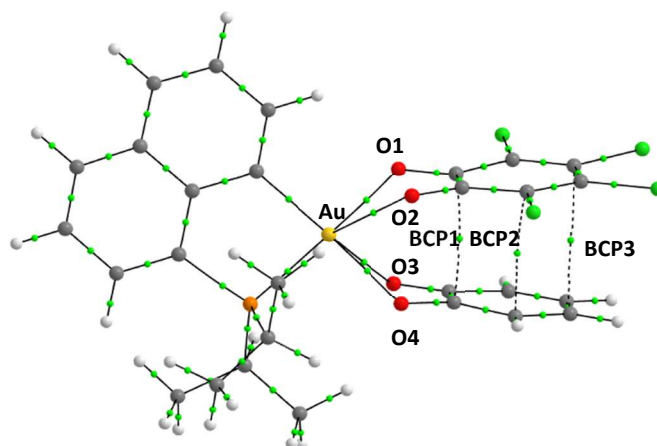

| BCP1                  |       | BCP2                  |       |
|-----------------------|-------|-----------------------|-------|
| Distance C...C (Å)    | 2.706 | Distance C...C (Å)    | 2.980 |
| $\rho(r)^a$           | 0.021 | $\rho(r)^a$           | 0.013 |
| $\nabla^2\rho(r)^b$   | 0.049 | $\nabla^2\rho(r)^b$   | 0.039 |
| $\epsilon^c$          | 0.73  | $\epsilon^c$          | 1.054 |
| Bond index $\delta^d$ | 0.085 | Bond index $\delta^d$ | 0.038 |
| BCP3                  |       |                       |       |
| Distance C...C (Å)    | 3.121 |                       |       |
| $\rho(r)^a$           | 0.011 |                       |       |
| $\nabla^2\rho(r)^b$   | 0.028 |                       |       |
| $\epsilon^c$          | 3.48  |                       |       |
| Bond index $\delta^d$ | 0.049 |                       |       |
| BCP (Au-O1)           |       | BCP (Au-O2)           |       |
| Distance Au-O1 (Å)    | 2.103 | Distance Au-O2 (Å)    | 2.722 |
| $\rho(r)^a$           | 0.095 | $\rho(r)^a$           | 0.027 |
| $\nabla^2\rho(r)^b$   | 0.40  | $\nabla^2\rho(r)^b$   | 0.096 |
| $\epsilon^c$          | 0.06  | $\epsilon^c$          | 0.039 |
| Bond index $\delta^d$ | 0.561 | Bond index $\delta^d$ | 0.156 |
| BCP (Au-O3)           |       | BCP (Au-O4)           |       |
| Distance Au-O3 (Å)    | 2.698 | Distance Au-O4 (Å)    | 2.125 |
| $\rho(r)^a$           | 0.029 | $\rho(r)^a$           | 0.084 |
| $\nabla^2\rho(r)^b$   | 0.10  | $\nabla^2\rho(r)^b$   | 0.36  |
| $\epsilon^c$          | 0.05  | $\epsilon^c$          | 0.07  |
| Bond index $\delta^d$ | 0.177 | Bond index $\delta^d$ | 0.519 |

<sup>a</sup> Density at the main BCP in e.bohr<sup>-3</sup>. <sup>b</sup> Laplacian of density at the main BCP in e.bohr<sup>-5</sup>.

<sup>c</sup> Ellipticity. <sup>d</sup> Delocalization index

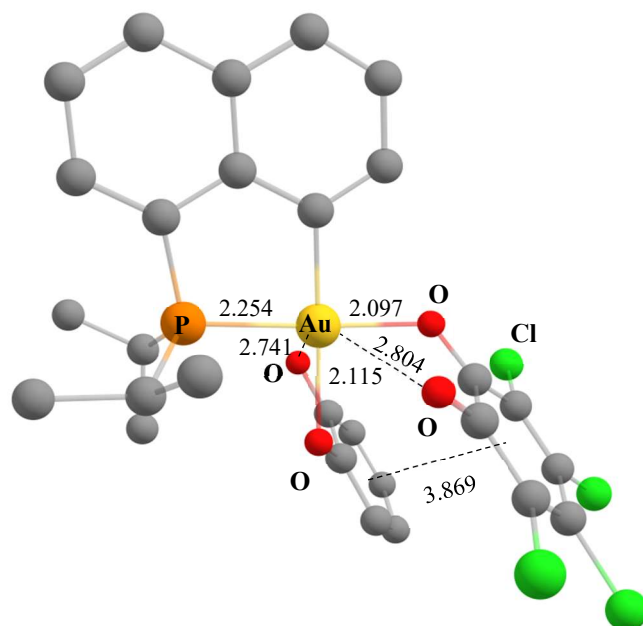

$\Delta E(S/T)$  : 0.9 kcal/mol (Singlet state the more stable)

**Figure S75.** Main geometrical features of the intermediate  $\text{INT}^T$  at triplet state, with 3,4,5,6-tetrachloro 1,2-catecholate moiety in *trans* to P. Main distances in Å. Calculations carried out at UB3PW91-D3(BJ)/SDD+f(Au), 6-31G\*\* (other atoms). Hydrogens omitted for clarity. Energy gap between singlet and triplet state ( $\Delta E(S/T)$ ) in kcal/mol.

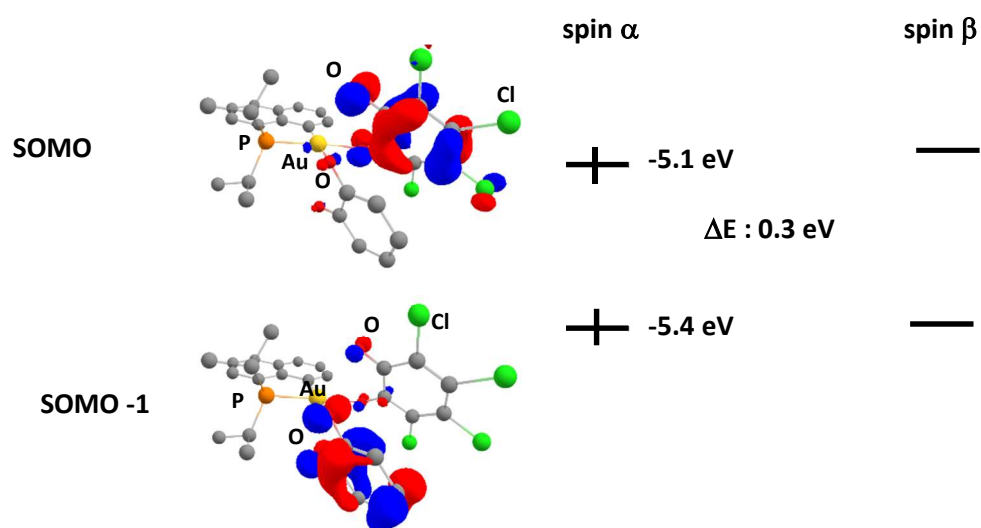

**Figure S76.** Plot of the two semi-occupied molecular orbitals (cutoff : 0.05) for intermediate  $\text{INT}^T$  at triplet state. Calculations carried out at UB3PW91-D3(BJ)/SDD+f(Au), 6-31G\*\* (other atoms). Hydrogens omitted for clarity. Energy difference ( $\Delta E$ ) between the two mono-occupied MO in eV.

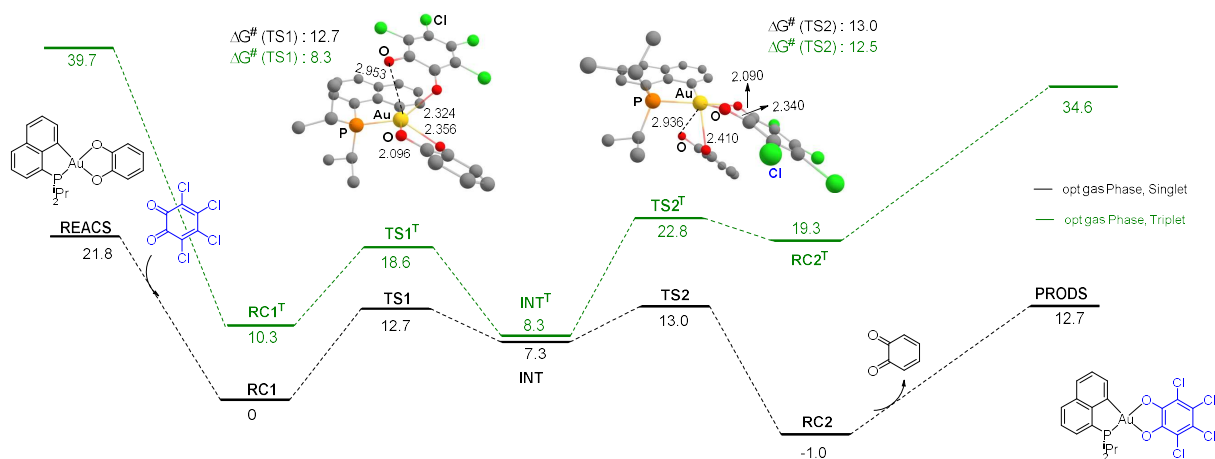

**Figure S77.** Energy profile ( $\Delta G$  in kcal/mol) of the catechol exchange reaction at Gold(III) on the triplet PES (green path), computed at UB3PW91-D3(BJ)/SDD+f (Au), 6-31G\*\* (other atoms) level of theory, with the approach of 3,4,5,6-tetrachloro-1,2-benzoquinone in *trans* to P. Energy profile for singlet state PES (black path) was plotted for comparison. Hydrogens omitted for clarity. Structures of the two transition states  $TS1^T$  and  $TS2^T$  at triplet state, with main distances in Å.

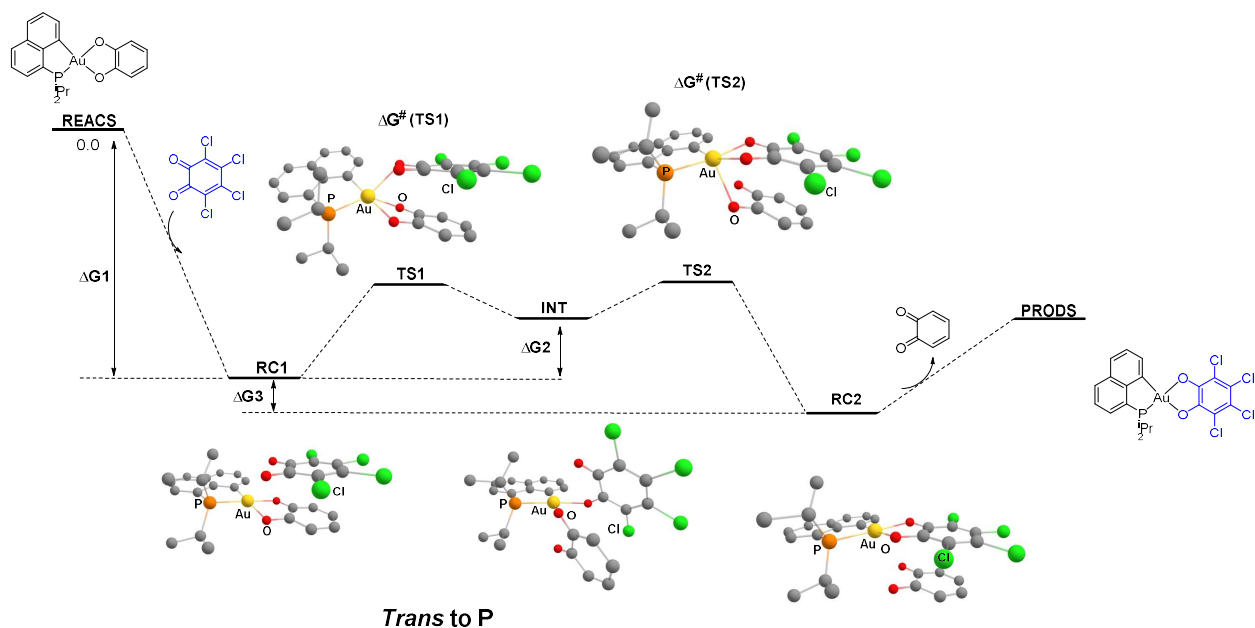

|                | Functional       | $\Delta G1$ | $\Delta G^\#$<br>(TS1) | $\Delta G2$ | $\Delta G^\#$<br>(TS2) | $\Delta G3$ |
|----------------|------------------|-------------|------------------------|-------------|------------------------|-------------|
| Hybrid         | B3PW91-D3(BJ)    | -21.8       | 12.7                   | 7.3         | 13.1                   | -1.0        |
| Hybrid         | PBE0-D3(BJ)      | -16.9       | 13.7                   | 8.4         | 13.9                   | -2.0        |
| GGA            | B97D             | -22.2       | 12.1                   | 6.9         | 13.8                   | 1.6         |
| Meta-GGA       | TPSS-D3(BJ)      | -22.0       | 10.8                   | 5.8         | 11.7                   | 2.1         |
| Meta-GGA       | M06              | -16.0       | 12.3                   | 8.0         | 11.7                   | -3.4        |
| Long range GGA | CAM-B3LYP-D3(BJ) | -14.5       | 16.6                   | 11.2        | 15.0                   | 4.8         |
| Long range GGA | WB97XD           | -13.3       | 17.3                   | 12.0        | 15.3                   | 3.3         |

**Figure S78.** Energy profiles ( $\Delta G$  in kcal/mol) of the catechol exchange reaction at Gold(III) computed at Functional/SDD+f(Au), 6-31G\*\* (other atoms). Displacement of Au–O bond *trans* to P. Hydrogens omitted for clarity.

With all the functionals tested, the energy profile looks like very similar.

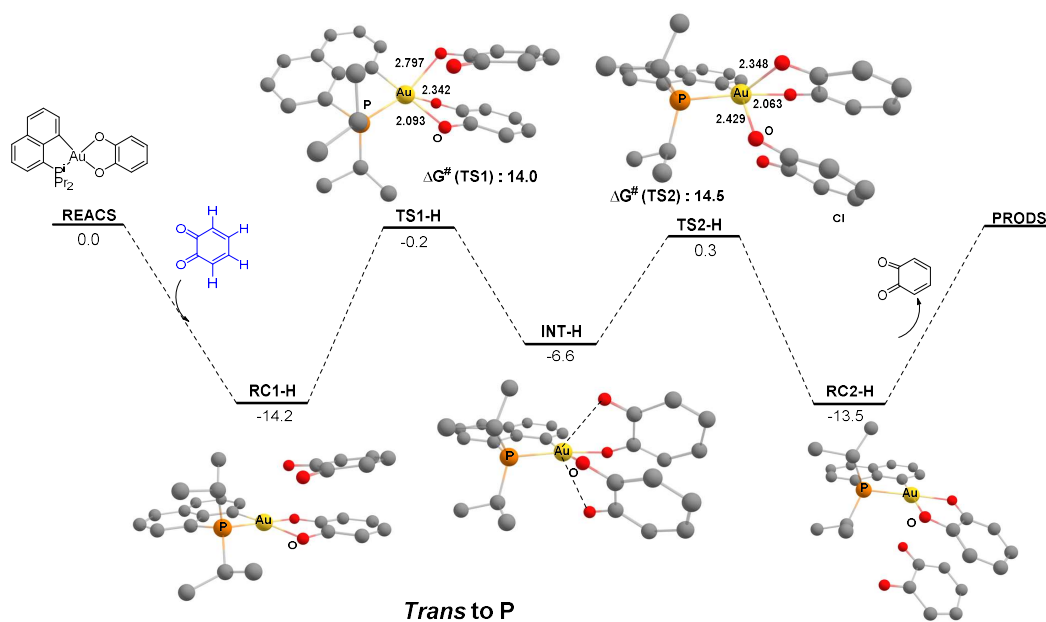

**Figure S79.** Energy profile (ΔG in kcal/mol) of the catechol exchange reaction with o-quinone at Gold(III) computed at B3PW91-D3(BJ)/SDD+f (Au), 6-31G\*\* (other atoms) level of theory. Displacement of Au–O bond *trans* to P. Hydrogens omitted for clarity.

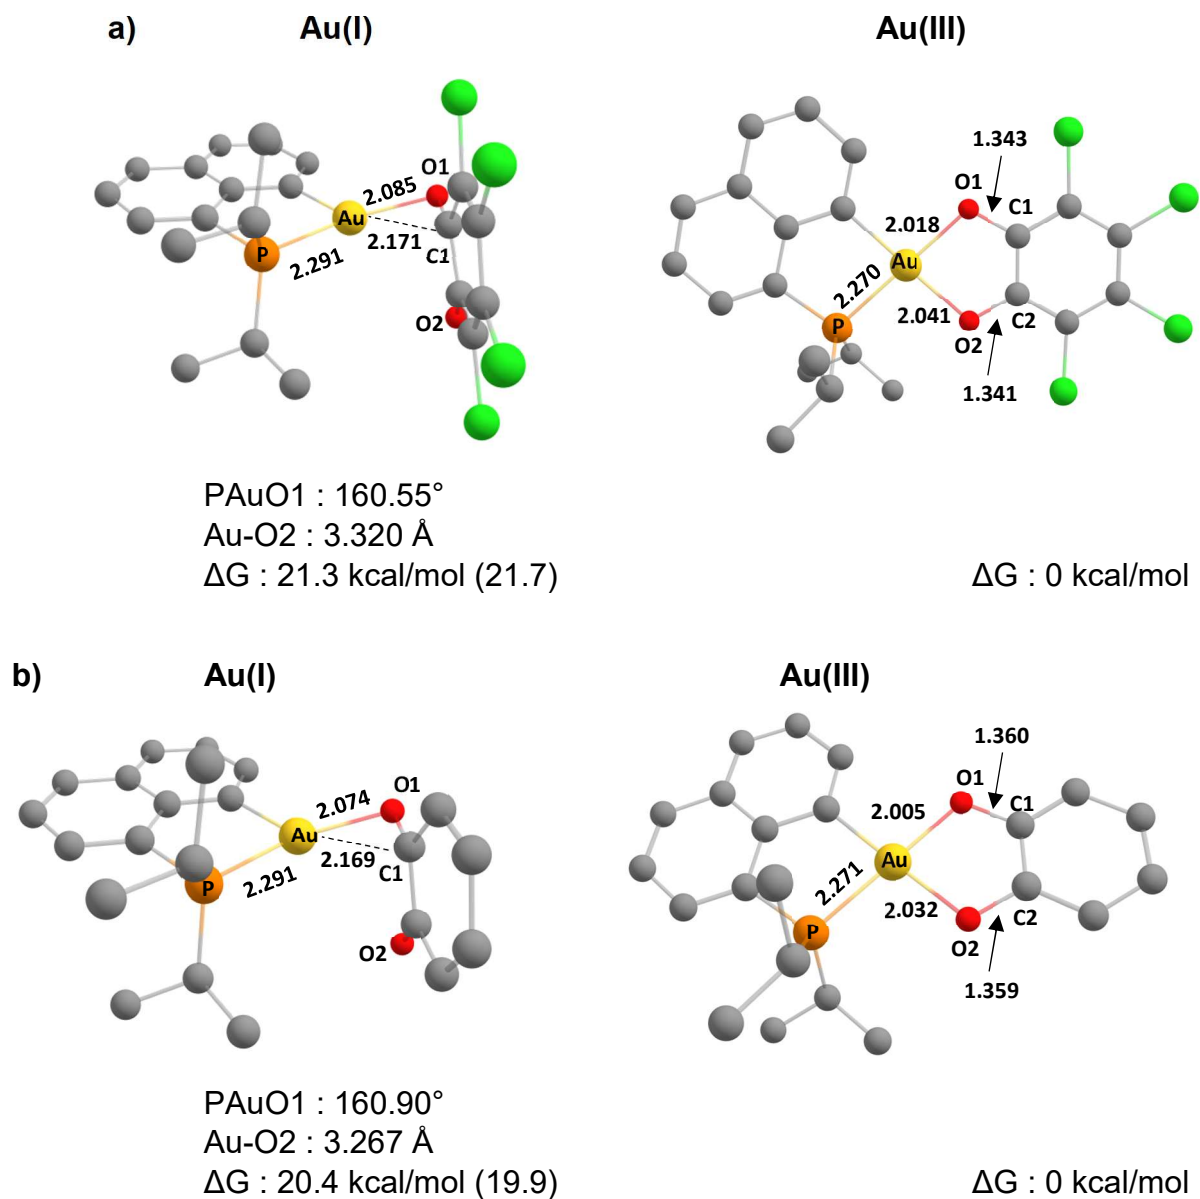

**Figure S80.** Relative stability ( $\Delta G$  in kcal/mol) of Au(I) and Au(III) forms for (P,C)Au(O,O)Cl<sub>4</sub> (a) and (P,C)Au(O,O)H<sub>4</sub> (b) computed at B3PW91-D3(BJ)/SDD+f (Au), 6-31G\*\* (other atoms) level of theory.

Into brackets values computed at SMD(DCM)-B3PW91-D3(BJ)/SDD+f (Au), 6-31G\*\* (other atoms)//B3PW91-D3(BJ)/SDD+f (Au), 6-31G\*\* (other atoms) level of theory.



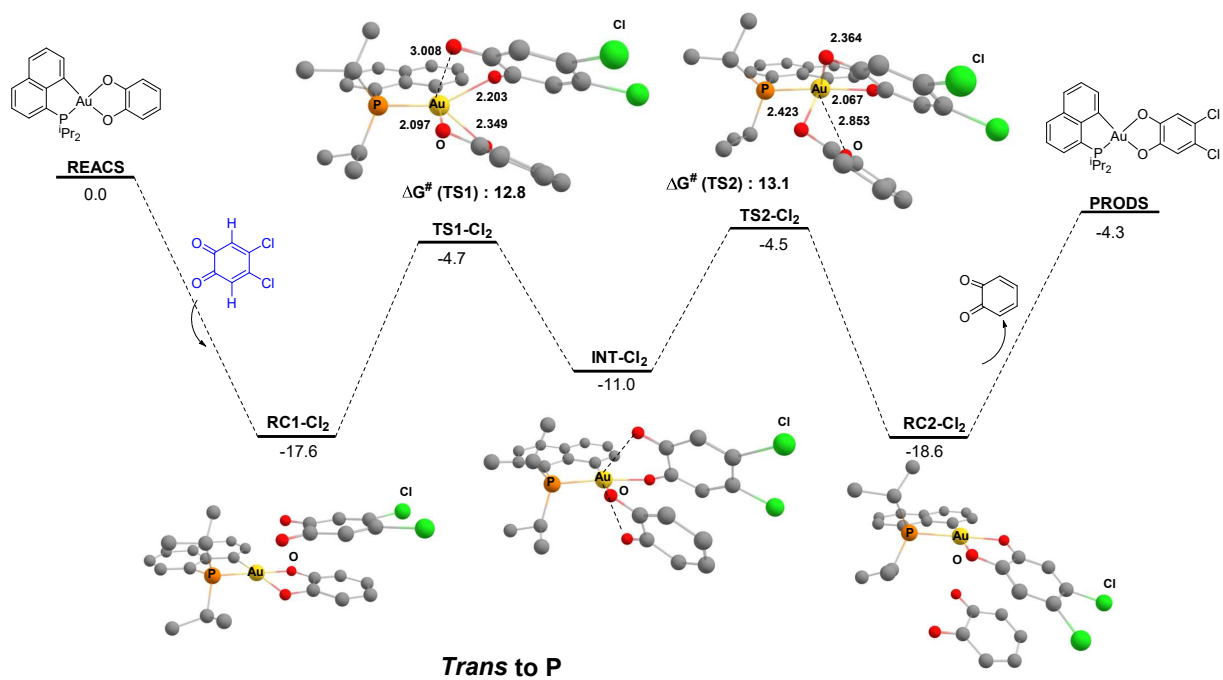

**Figure S81.** Energy profile ( $\Delta G$  in kcal/mol) of the catechol exchange reaction at Gold(III) with 4,5-dichloro *o*-quinone computed at B3PW91-D3(BJ)/SDD+f (Au), 6-31G\*\* (other atoms) level of theory. Displacement of Au–O bond *trans* to P. Hydrogens omitted for clarity.

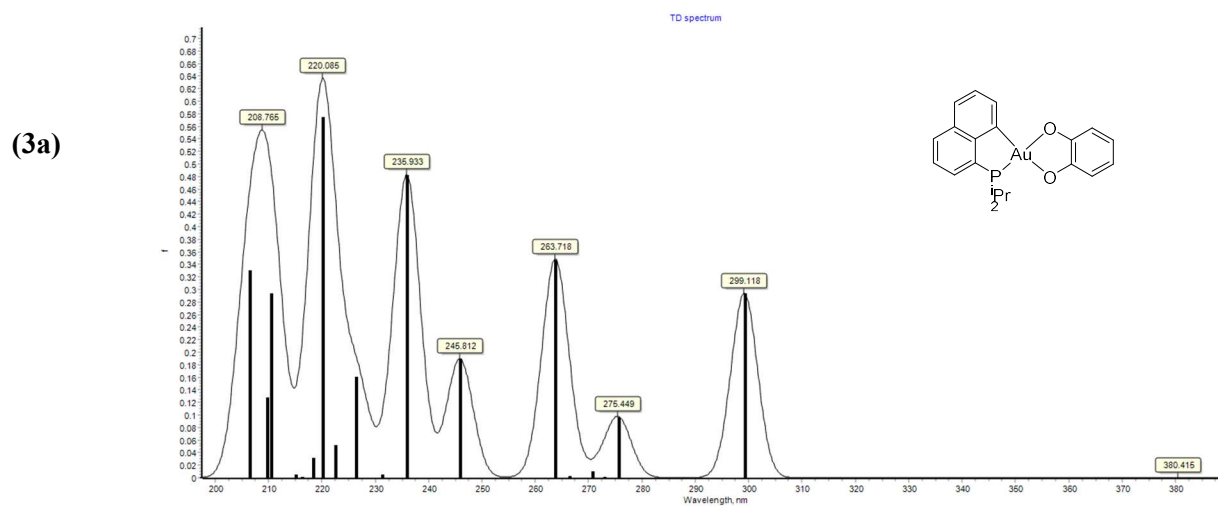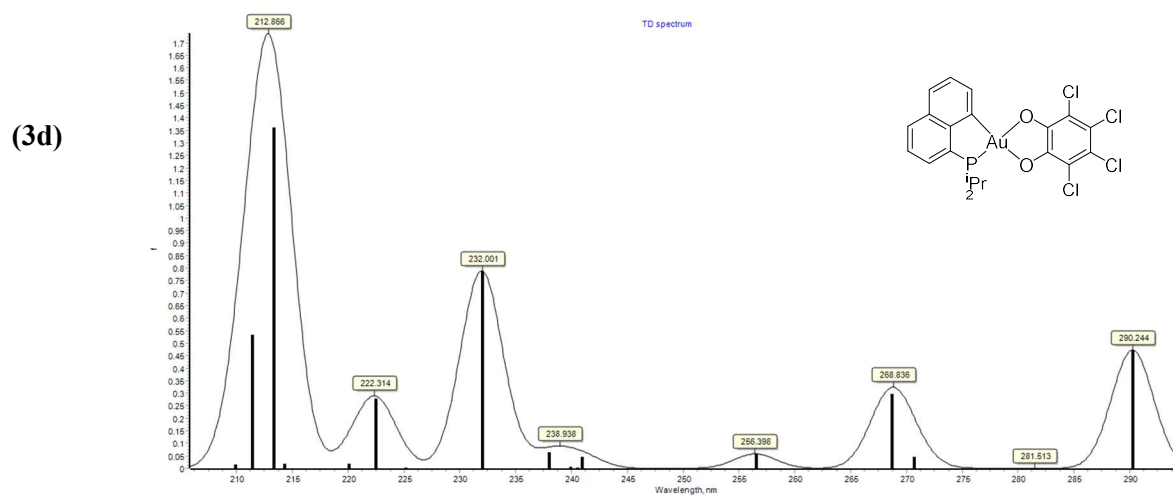

**Figure S82.** Simulation of the UV-Visible spectra for (P,C)Au(O,O)H<sub>4</sub> (**3a**) and (P,C)Au(O,O)Cl<sub>4</sub> (**3d**) computed by TD-DFT at SMD(DCM)-CAM-B3LYP//B3PW91-D3(BJ)/SDD+f (Au), 6-31G\*\* (other atoms) level of theory.

|                                        | $\lambda$ (nm) | Transition energy (eV) | f      | Electronic transition                                                 |
|----------------------------------------|----------------|------------------------|--------|-----------------------------------------------------------------------|
| <b>(P,C)Au(O,O)H<sub>4</sub> (3a)</b>  |                |                        |        |                                                                       |
| <b>excited state 1</b>                 | 380.4          | 3.26                   | 0.0001 | HOMO → LUMO+1<br>LMCT                                                 |
| <b>excited state 2</b>                 | 299.2          | 4.14                   | 0.2936 | mainly HOMO → LUMO (51.1 %)<br>HOMO-2 → LUMO (34.5 %)<br>LLCT & ILCT  |
| <b>excited state 3</b>                 | 275.5          | 4.50                   | 0.0962 | mainly HOMO-2 → LUMO (31.4 %)<br>HOMO → LUMO (23.6 %)<br>ILCT         |
| <b>excited state 4</b>                 | 273.0          | 4.54                   | 0.0007 | mainly HOMO-1 → LUMO+1 (41.6 %)<br>HOMO-2 → LUMO+1 (28.1 %)<br>LMCT   |
| <b>excited state 5</b>                 | 270.7          | 4.58                   | 0.010  | mainly HOMO-3 → LUMO (35.8 %)<br>ILCT                                 |
| <b>(P,C)Au(O,O)Cl<sub>4</sub> (3d)</b> |                |                        |        |                                                                       |
| <b>excited state 1</b>                 | 354.8          | 3.49                   | 0.0001 | mainly HOMO → LUMO+1 (85.7 %)<br>LMCT                                 |
| <b>excited state 2</b>                 | 290.2          | 4.27                   | 0.4722 | mainly HOMO → LUMO (44.6 %)<br>HOMO-1 → LUMO (32.8 %)<br>LLCT & ILCT  |
| <b>excited state 3</b>                 | 281.4          | 4.41                   | 0.0004 | mainly HOMO-1 → LUMO+1 (69.1 %)<br>LMCT                               |
| <b>excited state 4</b>                 | 275.1          | 4.51                   | 0.0007 | HOMO → LUMO+2 (47.7 %)<br>mainly HOMO → LUMO+5 (52.3 %)<br>ILCT       |
| <b>excited state 5</b>                 | 270.6          | 4.58                   | 0.045  | mainly HOMO-3 → LUMO (40.2 %)<br>HOMO-1 → LUMO+3 (26.1 %)<br><br>LMCT |

**Table S4.** TD-DFT calculations for (P,C)Au(O,O)H<sub>4</sub> (**3a**) and (P,C)Au(O,O)Cl<sub>4</sub> (**3d**) : absorption wavelength  $\lambda$  (in nm) associated to the 5 first excited states and transition energies (in eV), oscillator strength f, associated electronic transitions. Calculations carried out at SMD(DCM)-CAM-B3LYP//B3PW91-D3(BJ)/SDD+f (Au), 6-31G\*\* (other atoms) level of theory. For Molecular Orbitals see Figure S81.

(P,C)Au(O,O)H<sub>4</sub> (**3a**)

LUMO+4

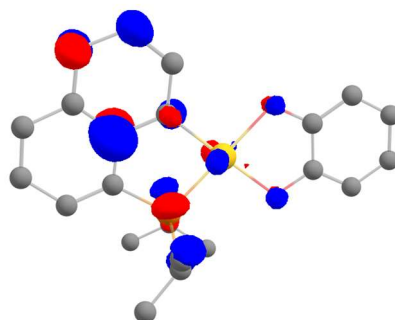

LUMO+1

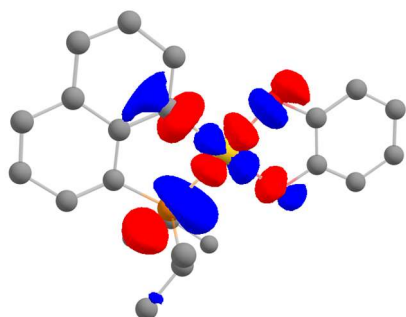

LUMO

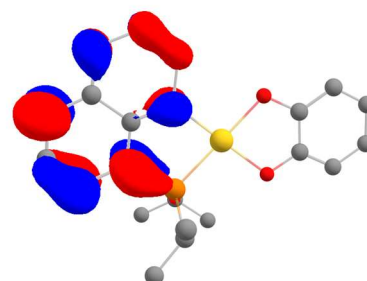

HOMO

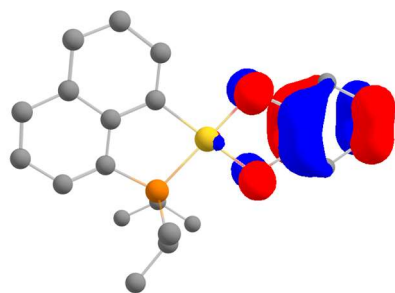

HOMO-1

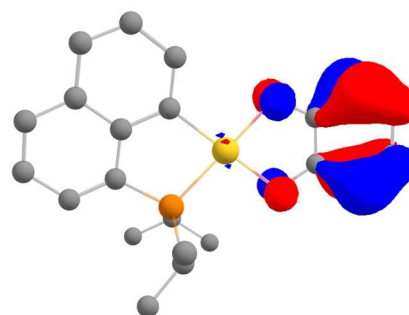

HOMO-2

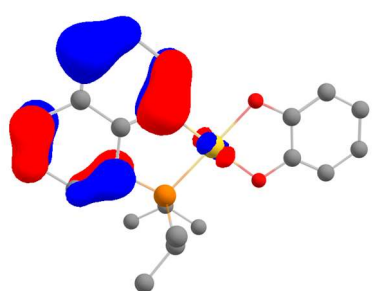

HOMO-3

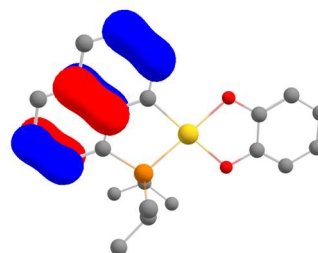

(P,C)Au(O,O)Cl<sub>4</sub> (**3d**)

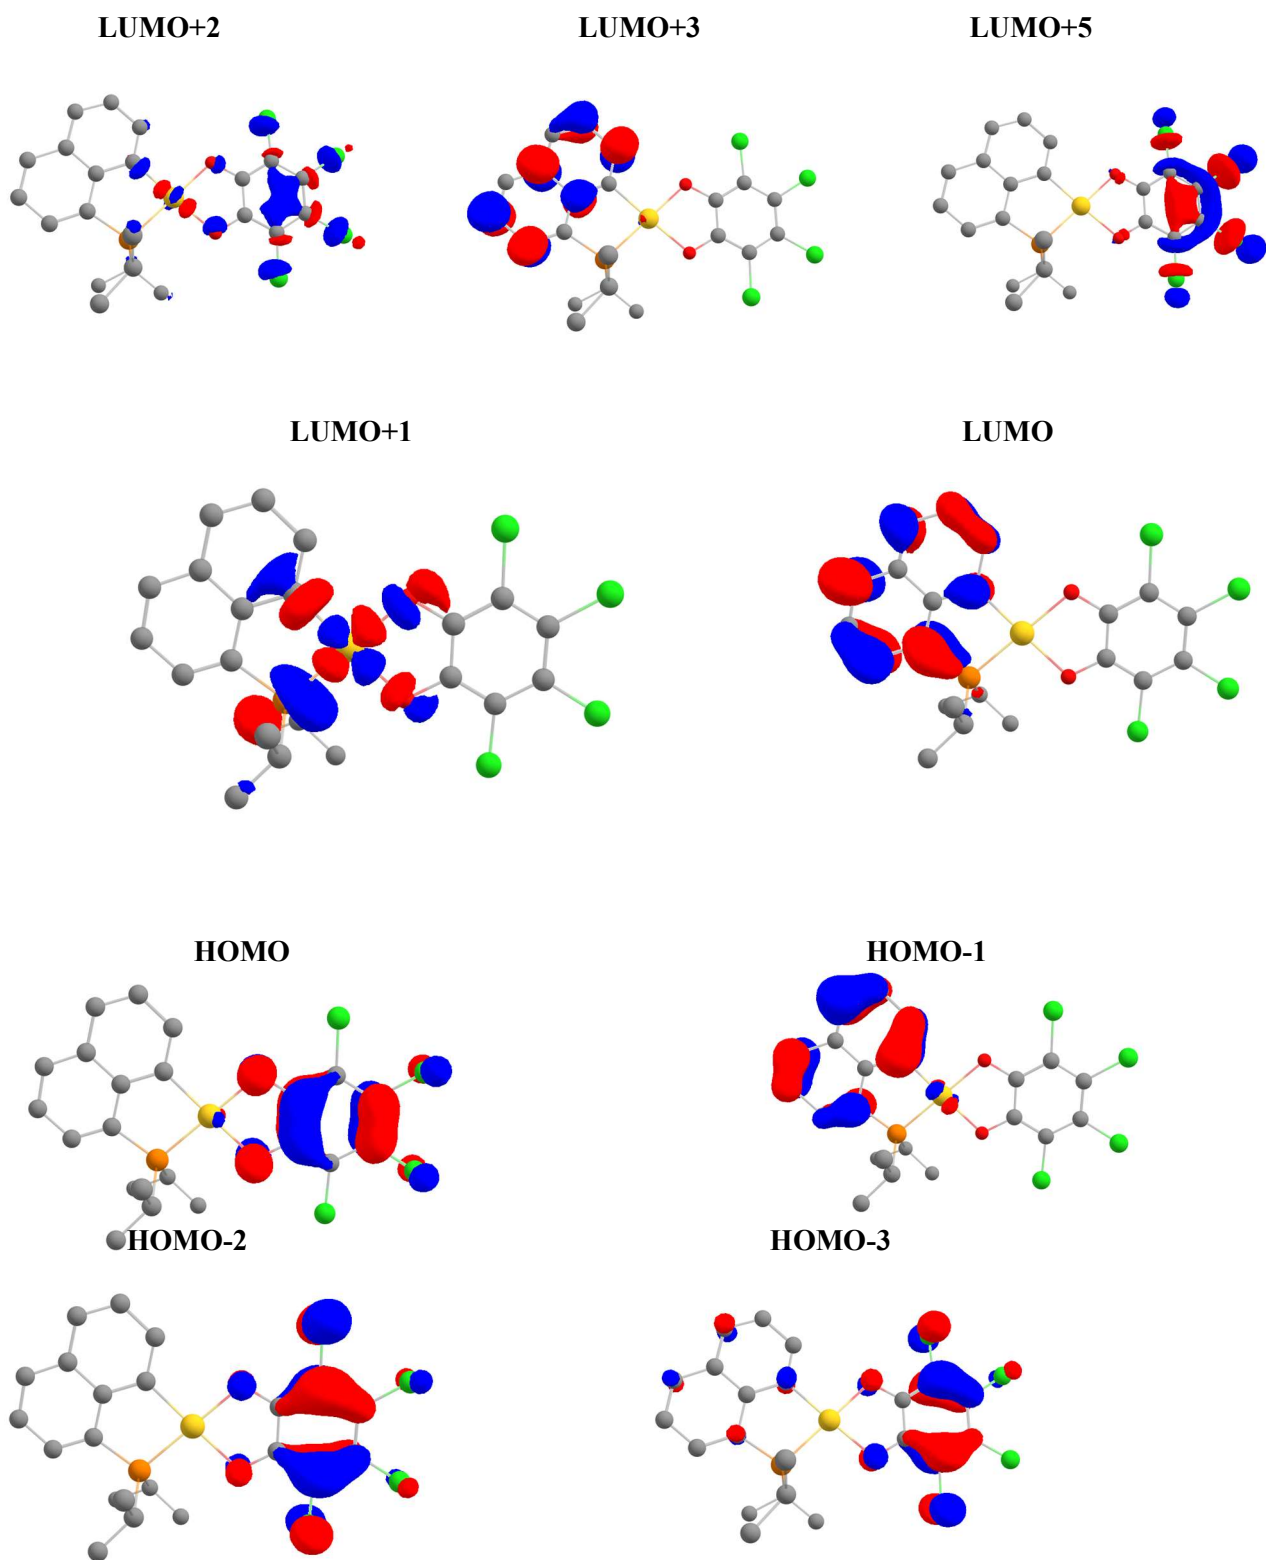

**Figure S83.** Main molecular orbitals (cutoff : 0.05) involved in the main transitions for UV-Visible spectra of (P,C)Au(O,O)H<sub>4</sub> (**3a**) and (P,C)Au(O,O)Cl<sub>4</sub> (**3d**), computed at SMD(DCM)-CAM-B3LYP//B3PW91-D3(BJ)/SDD+f (Au), 6-31G\*\* (other atoms) level of theory.

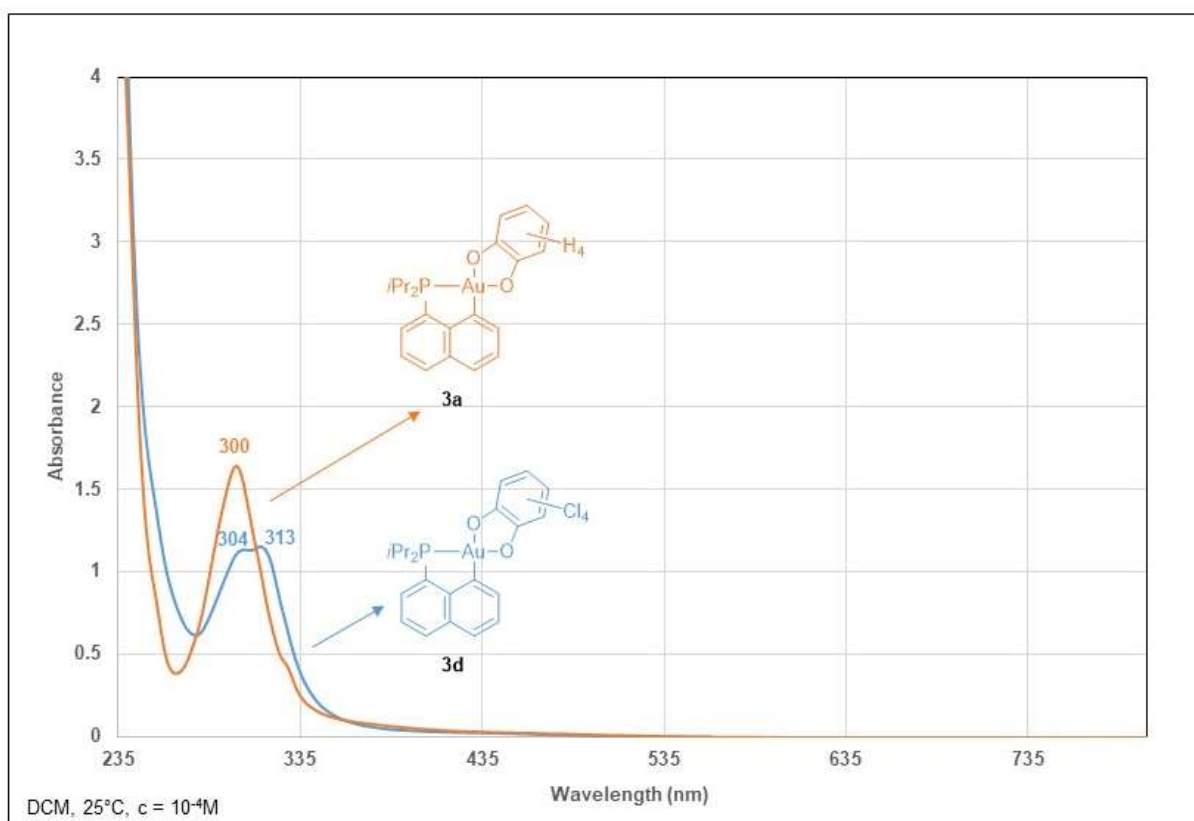

**Figure S84.** UV absorption spectra for complexes **3a** and **3d**.

For (P,C)Au(O,O)H<sub>4</sub> (**3a**), the Au(II) semi-quinone form has only been located as a transition state on the Singlet Open Shell Potential Energy Surface (PES), connecting the two forms Au(III) and Au(I). As *minimum*, this form converges to the Au(III) form.

Au(II) form – TS – Singlet Open Shell

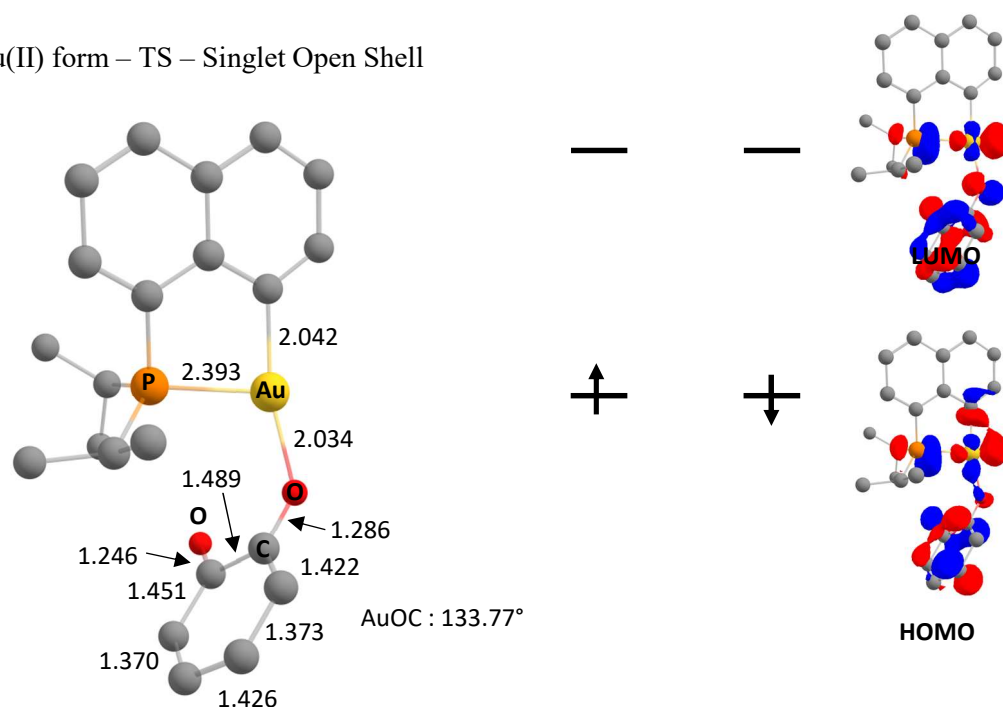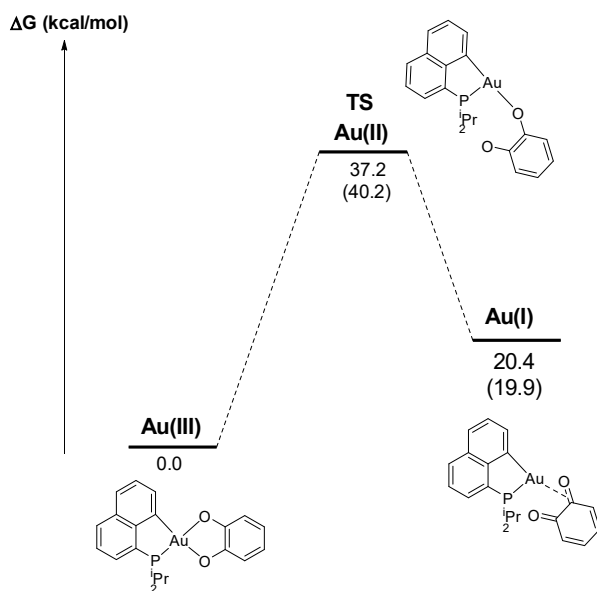

**Figure S85.** Au(II) semi-quinone form for (P,C)Au(O,O)H<sub>4</sub> (**3a**) localized as transition state (TS) on the singlet surface. Frontier Molecular Orbitals (cutoff :0.05). Energy profile ( $\Delta G$  in kcal/mol) computed at UB3PW91-D3(BJ)/SDD+f (Au), 6-31G\*\* (other atoms) level of theory. Into brackets, values at SMD(DCM)-UB3PW91-D3(BJ)/SDD+f (Au), 6-31G\*\* (other atoms)//UB3PW91-D3(BJ)/SDD+f (Au), 6-31G\*\* (other atoms).

For (P,C)Au(O,O)H<sub>4</sub> (**3a**), the Au(II) semi-quinone form has also been located as a *minimum* on the triplet state Potential Energy Surface (PES).

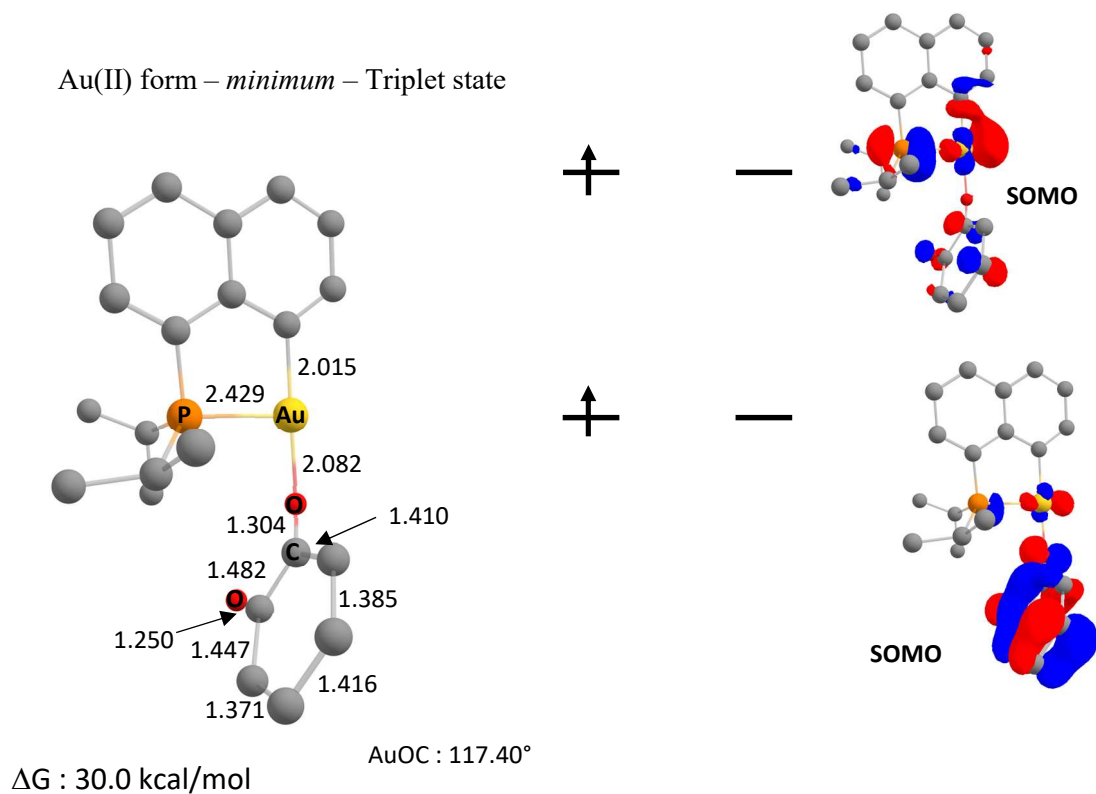

**Figure S86.** Au(II) semi-quinone form for (P,C)Au(O,O)H<sub>4</sub> (**3a**) localized on the triplet state Potential Energy Surface, computed at UB3PW91-D3(BJ)/SDD+f (Au), 6-31G\*\* (other atoms) level of theory. Frontier Molecular Orbitals (cutoff :0.05). Relative energy ( $\Delta G$  in kcal/mol) from closed shell singlet Au(III) form.



### 13. Z-matrices and energies in au

#### Optimization GAS PHASE, Singlet state

- Approach *trans* to P

#### RC1

|    |              |              |              |
|----|--------------|--------------|--------------|
| Au | -1.054276000 | -0.286323000 | 0.696341000  |
| P  | -2.558509000 | 1.268458000  | 0.011105000  |
| O  | 0.384045000  | 0.977220000  | 1.486457000  |
| O  | 0.286136000  | -1.709239000 | 1.335534000  |
| C  | -2.467144000 | -1.588989000 | 0.118289000  |
| C  | -4.062254000 | 0.277191000  | -0.162875000 |
| C  | -3.779845000 | -1.116885000 | -0.161708000 |
| C  | -4.817999000 | -2.043277000 | -0.475447000 |
| C  | -6.115132000 | -1.533377000 | -0.730758000 |
| H  | -6.915364000 | -2.233647000 | -0.954988000 |
| C  | -6.369435000 | -0.180635000 | -0.704663000 |
| H  | -7.370185000 | 0.188682000  | -0.905296000 |
| C  | -5.334097000 | 0.740784000  | -0.436370000 |
| H  | -5.548883000 | 1.803153000  | -0.454775000 |
| C  | 1.492796000  | 0.299337000  | 1.697927000  |
| C  | 2.706405000  | 0.928224000  | 2.033231000  |
| C  | 3.828839000  | 0.162284000  | 2.286507000  |
| C  | 3.759142000  | -1.246264000 | 2.261436000  |
| C  | 2.576216000  | -1.897059000 | 1.965805000  |
| C  | 1.432220000  | -1.143817000 | 1.646786000  |
| C  | -4.502302000 | -3.423456000 | -0.521609000 |
| C  | -2.187663000 | -2.933038000 | 0.042361000  |
| H  | -1.179590000 | -3.284837000 | 0.235891000  |
| C  | -3.217603000 | -3.849844000 | -0.279378000 |
| H  | -5.287263000 | -4.135918000 | -0.758900000 |
| H  | -2.980266000 | -4.908469000 | -0.328982000 |
| H  | 2.510116000  | -2.978210000 | 1.929112000  |
| H  | 4.652248000  | -1.827999000 | 2.465541000  |
| H  | 4.772467000  | 0.648814000  | 2.510324000  |
| H  | 2.734796000  | 2.012189000  | 2.056090000  |
| C  | -2.659020000 | 2.609174000  | 1.277725000  |
| H  | -2.477452000 | 2.064084000  | 2.211995000  |
| C  | -4.017198000 | 3.300514000  | 1.380205000  |
| C  | -1.495409000 | 3.581401000  | 1.057039000  |
| H  | -0.540942000 | 3.056464000  | 0.965251000  |
| H  | -1.651769000 | 4.191244000  | 0.162494000  |
| H  | -1.431723000 | 4.258446000  | 1.914251000  |
| H  | -4.283757000 | 3.826377000  | 0.459428000  |
| H  | -3.973825000 | 4.045271000  | 2.181215000  |
| H  | -4.814785000 | 2.594636000  | 1.622880000  |
| C  | -2.142788000 | 1.938846000  | -1.651481000 |
| H  | -1.178308000 | 2.432449000  | -1.499194000 |
| C  | -3.188115000 | 2.932149000  | -2.156355000 |
| C  | -1.932536000 | 0.774308000  | -2.619364000 |
| H  | -1.109924000 | 0.134291000  | -2.291944000 |
| H  | -2.840866000 | 0.172955000  | -2.728183000 |
| H  | -1.676643000 | 1.179575000  | -3.603330000 |
| H  | -4.162260000 | 2.452104000  | -2.289419000 |
| H  | -2.871449000 | 3.307754000  | -3.134331000 |
| H  | -3.308227000 | 3.795377000  | -1.497055000 |
| O  | 0.879591000  | 1.673138000  | -1.112966000 |
| O  | 0.646480000  | -1.021960000 | -1.388938000 |
| C  | 1.887039000  | 0.975614000  | -1.047310000 |
| C  | 3.227928000  | 1.520848000  | -0.874273000 |
| C  | 4.324180000  | 0.708404000  | -0.796351000 |

|    |             |              |              |
|----|-------------|--------------|--------------|
| C  | 4.194141000 | -0.733684000 | -0.878153000 |
| C  | 2.969968000 | -1.321730000 | -1.054438000 |
| C  | 1.754962000 | -0.529617000 | -1.167806000 |
| Cl | 2.785850000 | -3.023917000 | -1.208813000 |
| Cl | 5.620337000 | -1.700275000 | -0.801108000 |
| Cl | 5.892608000 | 1.384776000  | -0.568914000 |
| Cl | 3.338705000 | 3.233543000  | -0.732938000 |

Σ of electronic & zero-point Energies -3699.299449

Σ of electronic & thermal Free Energies -3699.369066

#### INT

|    |              |              |              |
|----|--------------|--------------|--------------|
| Au | -0.928909000 | 0.182283000  | -0.142309000 |
| P  | -2.764125000 | -1.115517000 | -0.221464000 |
| O  | 0.304641000  | -1.580164000 | -0.219731000 |
| O  | 0.336584000  | -0.123984000 | -2.505470000 |
| C  | -2.212716000 | 1.681056000  | 0.228430000  |
| C  | -4.072817000 | 0.044215000  | 0.227130000  |
| C  | -3.594679000 | 1.373346000  | 0.389162000  |
| C  | -4.519846000 | 2.410253000  | 0.714526000  |
| C  | -5.882905000 | 2.064214000  | 0.885672000  |
| H  | -6.589994000 | 2.849220000  | 1.140111000  |
| C  | -6.318246000 | 0.766516000  | 0.736218000  |
| H  | -7.367336000 | 0.524533000  | 0.873172000  |
| C  | -5.409988000 | -0.258063000 | 0.397051000  |
| H  | -5.773163000 | -1.271299000 | 0.264761000  |
| C  | 1.412054000  | -1.440394000 | -0.862555000 |
| C  | 2.595314000  | -2.119173000 | -0.470898000 |
| C  | 3.755470000  | -1.932619000 | -1.179927000 |
| C  | 3.776563000  | -1.141343000 | -2.370158000 |
| C  | 2.653947000  | -0.525390000 | -2.839225000 |
| C  | 1.407074000  | -0.637121000 | -2.127595000 |
| C  | -4.035802000 | 3.734120000  | 0.853811000  |
| C  | -1.776821000 | 2.977863000  | 0.363110000  |
| H  | -0.725182000 | 3.207894000  | 0.233044000  |
| C  | -2.700398000 | 4.004728000  | 0.676073000  |
| H  | -4.735059000 | 4.527746000  | 1.100959000  |
| H  | -2.334568000 | 5.021923000  | 0.780255000  |
| H  | 2.660104000  | 0.081915000  | -3.737054000 |
| H  | 4.717197000  | -1.026692000 | -2.900127000 |
| H  | 4.673310000  | -2.403600000 | -0.843597000 |
| H  | 2.562840000  | -2.722056000 | 0.430222000  |
| C  | -3.001441000 | -1.763789000 | -1.935435000 |
| H  | -2.684513000 | -0.908622000 | -2.545092000 |
| C  | -4.450061000 | -2.105477000 | -2.280111000 |
| C  | -2.031366000 | -2.917447000 | -2.193964000 |
| H  | -1.009383000 | -2.645036000 | -1.924032000 |
| H  | -2.316635000 | -3.813871000 | -1.634615000 |
| H  | -2.050176000 | -3.168028000 | -3.258414000 |
| H  | -4.833020000 | -2.934419000 | -1.678182000 |
| H  | -4.498686000 | -2.413094000 | -3.329306000 |
| H  | -5.112923000 | -1.247163000 | -2.151053000 |
| C  | -2.576782000 | -2.454628000 | 1.023247000  |
| H  | -1.689906000 | -2.993693000 | 0.667539000  |
| C  | -3.776475000 | -3.398423000 | 1.091709000  |
| C  | -2.250968000 | -1.824304000 | 2.380193000  |
| H  | -1.318333000 | -1.255148000 | 2.350637000  |
| H  | -3.059235000 | -1.165609000 | 2.714216000  |
| H  | -2.136565000 | -2.620235000 | 3.122432000  |
| H  | -4.670632000 | -2.875877000 | 1.443600000  |
| H  | -3.561368000 | -4.195603000 | 1.809907000  |
| H  | -4.000133000 | -3.870309000 | 0.131958000  |
| O  | 0.780496000  | -0.090942000 | 1.958798000  |

|    |             |              |              |
|----|-------------|--------------|--------------|
| O  | 0.709047000 | 1.498388000  | -0.234993000 |
| C  | 1.853989000 | 0.178742000  | 1.393757000  |
| C  | 3.140818000 | -0.307541000 | 1.832531000  |
| C  | 4.301757000 | 0.034848000  | 1.177090000  |
| C  | 4.268662000 | 0.895828000  | 0.035284000  |
| C  | 3.062763000 | 1.414510000  | -0.416209000 |
| C  | 1.836666000 | 1.022494000  | 0.175373000  |
| Cl | 2.997929000 | 2.557475000  | -1.707605000 |
| Cl | 5.748926000 | 1.374894000  | -0.713224000 |
| Cl | 5.818804000 | -0.599984000 | 1.706014000  |
| Cl | 3.136122000 | -1.369972000 | 3.190609000  |

Σ of electronic & zero-point Energies -3699.287541  
 Σ of electronic & thermal Free Energies -3699.357405

**RC2**

|    |              |              |              |
|----|--------------|--------------|--------------|
| Au | 0.913419000  | 0.368754000  | -0.522423000 |
| P  | 2.570582000  | -1.162975000 | -0.299973000 |
| O  | -0.926324000 | -2.708243000 | 2.042236000  |
| O  | -0.012678000 | -0.130022000 | 2.062567000  |
| C  | 2.333915000  | 1.693097000  | -0.019216000 |
| C  | 3.921148000  | -0.163170000 | 0.365787000  |
| C  | 3.617823000  | 1.225825000  | 0.379906000  |
| C  | 4.614446000  | 2.154956000  | 0.802280000  |
| C  | 5.875730000  | 1.649297000  | 1.203450000  |
| H  | 6.637563000  | 2.351281000  | 1.531800000  |
| C  | 6.143203000  | 0.298951000  | 1.186831000  |
| H  | 7.114890000  | -0.067397000 | 1.502516000  |
| C  | 5.162575000  | -0.622074000 | 0.760507000  |
| H  | 5.392575000  | -1.681545000 | 0.754360000  |
| C  | -1.734004000 | -1.793430000 | 2.129573000  |
| C  | -3.170419000 | -2.000757000 | 2.266667000  |
| C  | -4.005127000 | -0.942489000 | 2.378577000  |
| C  | -3.527190000 | 0.425798000  | 2.365551000  |
| C  | -2.211964000 | 0.725008000  | 2.237444000  |
| C  | -1.224851000 | -0.336614000 | 2.128801000  |
| C  | 4.296703000  | 3.535553000  | 0.805856000  |
| C  | 2.057271000  | 3.040411000  | -0.000915000 |
| H  | 1.071588000  | 3.393192000  | -0.287948000 |
| C  | 3.050199000  | 3.961337000  | 0.412611000  |
| H  | 5.050648000  | 4.248843000  | 1.126513000  |
| H  | 2.811715000  | 5.020835000  | 0.421384000  |
| H  | -1.848605000 | 1.746992000  | 2.209382000  |
| H  | -4.259090000 | 1.223341000  | 2.446471000  |
| H  | -5.075767000 | -1.103763000 | 2.460420000  |
| H  | -3.527757000 | -3.024337000 | 2.248962000  |
| C  | 1.999302000  | -2.524508000 | 0.797614000  |
| H  | 1.300714000  | -2.010487000 | 1.471724000  |
| C  | 3.104017000  | -3.174886000 | 1.626777000  |
| C  | 1.182056000  | -3.525677000 | -0.022228000 |
| H  | 0.386504000  | -3.026552000 | -0.581369000 |
| H  | 1.809263000  | -4.106318000 | -0.706700000 |
| H  | 0.695943000  | -4.215588000 | 0.670586000  |
| H  | 3.840385000  | -3.700407000 | 1.010398000  |
| H  | 2.642145000  | -3.913572000 | 2.288736000  |
| H  | 3.625888000  | -2.447477000 | 2.252903000  |
| C  | 3.083274000  | -1.789613000 | -1.957063000 |
| H  | 2.187934000  | -2.302165000 | -2.329510000 |
| C  | 4.245981000  | -2.778418000 | -1.875626000 |
| C  | 3.405948000  | -0.608596000 | -2.872993000 |
| H  | 2.550519000  | 0.062505000  | -2.985449000 |
| H  | 4.246130000  | -0.026046000 | -2.482402000 |
| H  | 3.682219000  | -0.980207000 | -3.864403000 |

|    |              |              |              |
|----|--------------|--------------|--------------|
| H  | 5.150468000  | -2.287276000 | -1.505323000 |
| H  | 4.465664000  | -3.161333000 | -2.877085000 |
| H  | 4.024407000  | -3.634239000 | -1.234140000 |
| O  | -0.607858000 | -0.943979000 | -0.993428000 |
| O  | -0.610621000 | 1.728147000  | -0.659073000 |
| C  | -1.767209000 | -0.329204000 | -0.848525000 |
| C  | -2.985308000 | -1.024563000 | -0.862764000 |
| C  | -4.195674000 | -0.340627000 | -0.707102000 |
| C  | -4.197086000 | 1.059068000  | -0.563580000 |
| C  | -2.990791000 | 1.769468000  | -0.586707000 |
| C  | -1.771128000 | 1.093760000  | -0.698132000 |
| Cl | -2.946932000 | 3.482699000  | -0.353705000 |
| Cl | -5.689942000 | 1.904991000  | -0.348419000 |
| Cl | -5.684986000 | -1.219279000 | -0.704175000 |
| Cl | -2.931786000 | -2.737813000 | -1.087202000 |

Σ of electronic & zero-point Energies -3699.300346  
 Σ of electronic & thermal Free Energies -3699.370703

**TS1**

|    |              |              |              |
|----|--------------|--------------|--------------|
| Au | 0.965078000  | 0.216340000  | 0.344523000  |
| P  | 2.758917000  | -1.146900000 | 0.253179000  |
| O  | -0.353675000 | -1.319985000 | 0.934074000  |
| O  | -0.413579000 | 1.172110000  | 2.009479000  |
| C  | 2.254476000  | 1.632907000  | -0.240192000 |
| C  | 4.083808000  | -0.025540000 | -0.245138000 |
| C  | 3.622726000  | 1.302537000  | -0.443530000 |
| C  | 4.543847000  | 2.309785000  | -0.858202000 |
| C  | 5.892621000  | 1.933296000  | -1.072228000 |
| H  | 6.601029000  | 2.693841000  | -1.389522000 |
| C  | 6.312442000  | 0.634348000  | -0.889203000 |
| H  | 7.349930000  | 0.368064000  | -1.064325000 |
| C  | 5.404720000  | -0.361369000 | -0.470240000 |
| H  | 5.755529000  | -1.377495000 | -0.327689000 |
| C  | -1.462541000 | -0.869597000 | 1.441496000  |
| C  | -2.629069000 | -1.668263000 | 1.497482000  |
| C  | -3.789080000 | -1.148876000 | 2.023817000  |
| C  | -3.817557000 | 0.153920000  | 2.593116000  |
| C  | -2.701904000 | 0.948039000  | 2.606101000  |
| C  | -1.480805000 | 0.485507000  | 2.026948000  |
| C  | 4.066059000  | 3.631232000  | -1.037596000 |
| C  | 1.818522000  | 2.922853000  | -0.426079000 |
| H  | 0.770590000  | 3.165262000  | -0.285329000 |
| C  | 2.740243000  | 3.923378000  | -0.821840000 |
| H  | 4.760965000  | 4.405697000  | -1.349350000 |
| H  | 2.379252000  | 4.937949000  | -0.962101000 |
| H  | -2.710735000 | 1.948431000  | 3.022847000  |
| H  | -4.748963000 | 0.524878000  | 3.009314000  |
| H  | -4.697802000 | -1.741796000 | 2.008852000  |
| H  | -2.591613000 | -2.659883000 | 1.059468000  |
| C  | 3.089273000  | -1.911319000 | 1.904495000  |
| H  | 2.874724000  | -1.078054000 | 2.585392000  |
| C  | 4.538577000  | -2.347136000 | 2.118315000  |
| C  | 2.077460000  | -3.027855000 | 2.173536000  |
| H  | 1.052566000  | -2.695911000 | 1.988154000  |
| H  | 2.276549000  | -3.905388000 | 1.551473000  |
| H  | 2.159007000  | -3.338606000 | 3.219373000  |
| H  | 4.837624000  | -3.141280000 | 1.428995000  |
| H  | 4.639872000  | -2.740139000 | 3.134871000  |
| H  | 5.233854000  | -1.511846000 | 2.011769000  |
| C  | 2.453732000  | -2.398228000 | -1.061969000 |
| H  | 1.494977000  | -2.846044000 | -0.770841000 |
| C  | 3.541058000  | -3.469814000 | -1.142762000 |

|    |              |              |              |
|----|--------------|--------------|--------------|
| C  | 2.268085000  | -1.668001000 | -2.393770000 |
| H  | 1.436549000  | -0.962329000 | -2.346365000 |
| H  | 3.182445000  | -1.141620000 | -2.684653000 |
| H  | 2.034375000  | -2.403559000 | -3.168901000 |
| H  | 4.509030000  | -3.032664000 | -1.406050000 |
| H  | 3.278698000  | -4.179059000 | -1.933767000 |
| H  | 3.652050000  | -4.035646000 | -0.215410000 |
| O  | -0.793082000 | -1.043868000 | -1.667781000 |
| O  | -0.712811000 | 1.456646000  | -0.609854000 |
| C  | -1.852099000 | -0.511138000 | -1.320426000 |
| C  | -3.147091000 | -1.154968000 | -1.429629000 |
| C  | -4.302406000 | -0.516750000 | -1.053538000 |
| C  | -4.267471000 | 0.821871000  | -0.531872000 |
| C  | -3.067264000 | 1.489719000  | -0.397227000 |
| C  | -1.823285000 | 0.856911000  | -0.720415000 |
| Cl | -2.996289000 | 3.126949000  | 0.138389000  |
| Cl | -5.749815000 | 1.614306000  | -0.138896000 |
| Cl | -5.822950000 | -1.325679000 | -1.174407000 |
| Cl | -3.146990000 | -2.772285000 | -2.027159000 |

Σ of electronic & zero-point Energies -3699.280691

Σ of electronic & thermal Free Energies -3699.348825

## TS2

|    |              |              |              |
|----|--------------|--------------|--------------|
| Au | 0.886419000  | 0.181130000  | -0.169819000 |
| P  | 2.666108000  | -1.137116000 | 0.258501000  |
| O  | -0.368128000 | -1.542560000 | 1.027113000  |
| O  | -0.181810000 | 0.828270000  | 2.347152000  |
| C  | 2.262630000  | 1.620557000  | -0.433730000 |
| C  | 4.050960000  | -0.070833000 | -0.210739000 |
| C  | 3.637429000  | 1.262639000  | -0.470061000 |
| C  | 4.615584000  | 2.263660000  | -0.748462000 |
| C  | 5.975249000  | 1.869651000  | -0.799606000 |
| H  | 6.726817000  | 2.621700000  | -1.024079000 |
| C  | 6.351850000  | 0.566018000  | -0.565435000 |
| H  | 7.399932000  | 0.287037000  | -0.606223000 |
| C  | 5.387668000  | -0.415243000 | -0.252388000 |
| H  | 5.710194000  | -1.425323000 | -0.028131000 |
| C  | -1.406224000 | -1.036939000 | 1.534076000  |
| C  | -2.683845000 | -1.688289000 | 1.492252000  |
| C  | -3.782111000 | -1.085820000 | 2.033799000  |
| C  | -3.686950000 | 0.183152000  | 2.700849000  |
| C  | -2.505429000 | 0.845784000  | 2.817589000  |
| C  | -1.292748000 | 0.287845000  | 2.260044000  |
| C  | 4.183932000  | 3.596997000  | -0.954372000 |
| C  | 1.869524000  | 2.923338000  | -0.615892000 |
| H  | 0.818166000  | 3.185496000  | -0.566328000 |
| C  | 2.848580000  | 3.913411000  | -0.877080000 |
| H  | 4.923515000  | 4.363449000  | -1.167178000 |
| H  | 2.524187000  | 4.939111000  | -1.025126000 |
| H  | -2.428713000 | 1.810906000  | 3.305516000  |
| H  | -4.594685000 | 0.622202000  | 3.104009000  |
| H  | -4.752394000 | -1.567133000 | 1.964057000  |
| H  | -2.744025000 | -2.641947000 | 0.978745000  |
| C  | 2.745552000  | -1.533428000 | 2.072983000  |
| H  | 2.138869000  | -0.727317000 | 2.503489000  |
| C  | 4.162816000  | -1.456738000 | 2.638426000  |
| C  | 2.065223000  | -2.865868000 | 2.392555000  |
| H  | 1.051423000  | -2.902714000 | 1.991913000  |
| H  | 2.639200000  | -3.716628000 | 2.013306000  |
| H  | 2.002836000  | -2.970944000 | 3.480115000  |
| H  | 4.814772000  | -2.226564000 | 2.212879000  |
| H  | 4.117423000  | -1.626819000 | 3.718604000  |

|    |              |              |              |
|----|--------------|--------------|--------------|
| H  | 4.625706000  | -0.482873000 | 2.467842000  |
| C  | 2.596326000  | -2.658454000 | -0.770305000 |
| H  | 1.739411000  | -3.200543000 | -0.351976000 |
| C  | 3.861683000  | -3.511143000 | -0.658761000 |
| C  | 2.282288000  | -2.282045000 | -2.219900000 |
| H  | 1.301234000  | -1.810033000 | -2.306475000 |
| H  | 3.042724000  | -1.606283000 | -2.625215000 |
| H  | 2.278728000  | -3.189460000 | -2.831859000 |
| H  | 4.696911000  | -3.031373000 | -1.175970000 |
| H  | 3.687044000  | -4.476272000 | -1.143811000 |
| H  | 4.158176000  | -3.708696000 | 0.374822000  |
| O  | -0.743148000 | -0.983576000 | -1.429361000 |
| O  | -0.699501000 | 1.500039000  | -0.392830000 |
| C  | -1.855193000 | -0.432004000 | -1.155263000 |
| C  | -3.119380000 | -1.055891000 | -1.378056000 |
| C  | -4.301120000 | -0.428477000 | -1.021627000 |
| C  | -4.275514000 | 0.862906000  | -0.431875000 |
| C  | -3.064841000 | 1.530814000  | -0.255365000 |
| C  | -1.845609000 | 0.899104000  | -0.563142000 |
| Cl | -3.002857000 | 3.136778000  | 0.376428000  |
| Cl | -5.757101000 | 1.637343000  | 0.003655000  |
| Cl | -5.812895000 | -1.237166000 | -1.238009000 |
| Cl | -3.099232000 | -2.643845000 | -2.054099000 |

Σ of electronic & zero-point Energies -3699.278583

Σ of electronic & thermal Free Energies -3699.348275

## Quinone-H4

|   |              |              |              |
|---|--------------|--------------|--------------|
| O | -1.726213000 | -1.382062000 | 0.000028000  |
| O | -1.726228000 | 1.382050000  | 0.000109000  |
| C | -0.671058000 | -0.777455000 | -0.000106000 |
| C | 0.635929000  | -1.450332000 | -0.000187000 |
| C | 1.775150000  | -0.729354000 | -0.000106000 |
| C | 1.775145000  | 0.729366000  | 0.000093000  |
| C | 0.635919000  | 1.450336000  | 0.000168000  |
| C | -0.671067000 | 0.777452000  | -0.000066000 |
| H | 0.631822000  | 2.535745000  | 0.000348000  |
| H | 2.737881000  | 1.233428000  | 0.000206000  |
| H | 2.737890000  | -1.233410000 | -0.000148000 |
| H | 0.631836000  | -2.535741000 | -0.000285000 |

Σ of electronic & zero-point Energies -381.231414

Σ of electronic & thermal Free Energies -381.262127

## Quinone-Cl4

|    |              |              |              |
|----|--------------|--------------|--------------|
| O  | -1.363906000 | 2.780192000  | 0.000061000  |
| O  | 1.363899000  | 2.780194000  | -0.000052000 |
| C  | -0.773888000 | 1.724969000  | 0.000330000  |
| C  | -1.455057000 | 0.415156000  | 0.000117000  |
| C  | -0.738189000 | -0.740041000 | 0.000004000  |
| C  | 0.738191000  | -0.740040000 | -0.000007000 |
| C  | 1.455056000  | 0.415159000  | -0.000111000 |
| C  | 0.773885000  | 1.724970000  | -0.000321000 |
| Cl | 3.165463000  | 0.452346000  | -0.000146000 |
| Cl | 1.540903000  | -2.254817000 | 0.000048000  |
| Cl | -1.540898000 | -2.254819000 | -0.000065000 |
| Cl | -3.165464000 | 0.452341000  | 0.000154000  |

Σ of electronic & zero-point Energies -2219.434972

Σ of electronic & thermal Free Energies -2219.473994

**(P,C)Au(O,O)-H<sub>4</sub>**

|    |              |              |              |
|----|--------------|--------------|--------------|
| Au | 0.600926000  | 0.258823000  | -0.051937000 |
| P  | -1.112069000 | -1.231745000 | -0.041248000 |
| O  | 2.089770000  | -1.121392000 | 0.036671000  |
| O  | 2.101601000  | 1.587674000  | -0.066670000 |
| C  | -0.861160000 | 1.645826000  | -0.101443000 |
| C  | -2.563846000 | -0.156184000 | -0.045851000 |
| C  | -2.225108000 | 1.226912000  | -0.077295000 |
| C  | -3.273645000 | 2.196098000  | -0.079941000 |
| C  | -4.614368000 | 1.739927000  | -0.040658000 |
| H  | -5.414095000 | 2.475969000  | -0.040455000 |
| C  | -4.914180000 | 0.396700000  | -0.001969000 |
| H  | -5.948719000 | 0.069667000  | 0.029281000  |
| C  | -3.882918000 | -0.565891000 | -0.006174000 |
| H  | -4.137710000 | -1.619930000 | 0.015661000  |
| C  | 3.286498000  | -0.478018000 | 0.036139000  |
| C  | 4.491910000  | -1.173959000 | 0.087509000  |
| C  | 5.700469000  | -0.474310000 | 0.089771000  |
| C  | 5.703970000  | 0.917962000  | 0.041265000  |
| C  | 4.499988000  | 1.623516000  | -0.010807000 |
| C  | 3.291311000  | 0.931499000  | -0.014203000 |
| C  | -2.929333000 | 3.569681000  | -0.117158000 |
| C  | -0.568952000 | 2.991318000  | -0.136136000 |
| H  | 0.470004000  | 3.306919000  | -0.151881000 |
| C  | -1.608705000 | 3.951179000  | -0.146126000 |
| H  | -3.722763000 | 4.311801000  | -0.120726000 |
| H  | -1.351086000 | 5.006087000  | -0.174286000 |
| H  | 4.480209000  | 2.708550000  | -0.049781000 |
| H  | 6.643657000  | 1.462763000  | 0.042945000  |
| H  | 6.637304000  | -1.022553000 | 0.130246000  |
| H  | 4.466181000  | -2.259307000 | 0.126119000  |
| C  | -1.044624000 | -2.295694000 | -1.549847000 |
| H  | -0.761790000 | -1.568048000 | -2.321656000 |
| C  | -2.371447000 | -2.931937000 | -1.958210000 |
| C  | 0.098861000  | -3.302619000 | -1.396883000 |
| H  | 1.027200000  | -2.812555000 | -1.083974000 |
| H  | -0.152280000 | -4.078346000 | -0.666386000 |
| H  | 0.273177000  | -3.798317000 | -2.356643000 |
| H  | -2.733568000 | -3.647614000 | -1.215508000 |
| H  | -2.228351000 | -3.478155000 | -2.896005000 |
| H  | -3.146964000 | -2.180536000 | -2.123337000 |
| C  | -1.047841000 | -2.231037000 | 1.505856000  |
| H  | -0.056758000 | -2.699656000 | 1.452841000  |
| C  | -2.126629000 | -3.306730000 | 1.613969000  |
| C  | -1.075838000 | -1.274878000 | 2.700679000  |
| H  | -0.257649000 | -0.551160000 | 2.657409000  |
| H  | -2.020414000 | -0.723598000 | 2.741873000  |
| H  | -0.974217000 | -1.847525000 | 3.627421000  |
| H  | -3.127048000 | -2.864680000 | 1.631954000  |
| H  | -1.995304000 | -3.854776000 | 2.552373000  |
| H  | -2.078595000 | -4.032279000 | 0.799323000  |

Σ of electronic & zero-point Energies -1479.805497

Σ of electronic & thermal Free Energies -1479.860282

**(P,C)Au(O,O)-Cl<sub>4</sub>**

|    |              |              |              |
|----|--------------|--------------|--------------|
| Au | -0.534808000 | 0.234662000  | -0.055334000 |
| P  | -2.281823000 | -1.214519000 | -0.051447000 |
| O  | 0.935903000  | -1.179724000 | 0.005529000  |
| O  | 1.021584000  | 1.518457000  | -0.058471000 |
| C  | -1.959405000 | 1.654073000  | -0.081530000 |
| C  | -3.705599000 | -0.104454000 | -0.051106000 |
| C  | -3.331763000 | 1.269026000  | -0.064002000 |

|    |              |              |              |
|----|--------------|--------------|--------------|
| C  | -4.352349000 | 2.266519000  | -0.054341000 |
| C  | -5.704632000 | 1.845209000  | -0.023722000 |
| H  | -6.484859000 | 2.601615000  | -0.014905000 |
| C  | -6.039643000 | 0.509709000  | -0.004052000 |
| H  | -7.082424000 | 0.209914000  | 0.020706000  |
| C  | -5.034899000 | -0.480395000 | -0.018909000 |
| H  | -5.317875000 | -1.527377000 | -0.010834000 |
| C  | 2.132624000  | -0.575446000 | 0.002637000  |
| C  | 3.323015000  | -1.303605000 | 0.028893000  |
| C  | 4.563238000  | -0.647157000 | 0.031453000  |
| C  | 4.607002000  | 0.751990000  | 0.006656000  |
| C  | 3.411519000  | 1.487852000  | -0.022620000 |
| C  | 2.177202000  | 0.835743000  | -0.026398000 |
| C  | -3.969022000 | 3.630360000  | -0.071625000 |
| C  | -1.624517000 | 2.989208000  | -0.096328000 |
| H  | -0.577955000 | 3.279080000  | -0.107175000 |
| C  | -2.638805000 | 3.976811000  | -0.093444000 |
| H  | -4.741193000 | 4.394367000  | -0.065759000 |
| H  | -2.351767000 | 5.024084000  | -0.106177000 |
| C  | -2.221930000 | -2.276810000 | -1.560859000 |
| H  | -1.910204000 | -1.558597000 | -2.330323000 |
| C  | -3.566311000 | -2.869694000 | -1.978963000 |
| C  | -1.114708000 | -3.322509000 | -1.397639000 |
| H  | -0.168186000 | -2.871543000 | -1.082770000 |
| H  | -1.397176000 | -4.088364000 | -0.668575000 |
| H  | -0.953742000 | -3.824893000 | -2.355988000 |
| H  | -3.957712000 | -3.571314000 | -1.237743000 |
| H  | -3.431607000 | -3.422991000 | -2.913559000 |
| H  | -4.315206000 | -2.093997000 | -2.153938000 |
| C  | -2.226406000 | -2.211697000 | 1.496054000  |
| H  | -1.249631000 | -2.708661000 | 1.435812000  |
| C  | -3.335617000 | -3.255610000 | 1.605096000  |
| C  | -2.223278000 | -1.257015000 | 2.692359000  |
| H  | -1.383603000 | -0.558174000 | 2.651369000  |
| H  | -3.150625000 | -0.677657000 | 2.737427000  |
| H  | -2.136947000 | -1.835055000 | 3.617044000  |
| H  | -4.322566000 | -2.785645000 | 1.631199000  |
| H  | -3.213696000 | -3.811668000 | 2.540313000  |
| H  | -3.312648000 | -3.980020000 | 0.787570000  |
| Cl | 3.415852000  | 3.218871000  | -0.056267000 |
| Cl | 6.126826000  | 1.579141000  | 0.010254000  |
| Cl | 6.026808000  | -1.569957000 | 0.065220000  |
| Cl | 3.211844000  | -3.033372000 | 0.056513000  |

Σ of electronic & zero-point Energies -3318.022345

Σ of electronic & thermal Free Energies -3318.084978

- Approach *cis* to P

**RC1'**

|    |              |              |              |
|----|--------------|--------------|--------------|
| Au | -1.086789000 | 0.231231000  | 0.838869000  |
| P  | -2.553006000 | -1.294866000 | 0.018262000  |
| O  | 1.500356000  | -2.327896000 | -1.197359000 |
| O  | 0.422320000  | 0.149217000  | -1.425800000 |
| C  | -2.419492000 | 1.577881000  | 0.175272000  |
| C  | -3.747038000 | -0.243919000 | -0.840729000 |
| C  | -3.531769000 | 1.140254000  | -0.597562000 |
| C  | -4.441075000 | 2.095251000  | -1.142265000 |
| C  | -5.528237000 | 1.620666000  | -1.916975000 |
| H  | -6.221048000 | 2.343507000  | -2.339504000 |
| C  | -5.712264000 | 0.275203000  | -2.142641000 |
| H  | -6.549068000 | -0.066634000 | -2.743468000 |
| C  | -4.819250000 | -0.672467000 | -1.598637000 |

|    |              |              |              |
|----|--------------|--------------|--------------|
| H  | -4.980587000 | -1.727589000 | -1.788382000 |
| C  | 2.233531000  | -1.353518000 | -1.108932000 |
| C  | 3.682148000  | -1.441656000 | -0.961483000 |
| C  | 4.458722000  | -0.320369000 | -0.879354000 |
| C  | 3.876666000  | 1.008667000  | -0.943940000 |
| C  | 2.524828000  | 1.181139000  | -1.079337000 |
| C  | 1.628525000  | 0.040180000  | -1.202486000 |
| C  | -4.212338000 | 3.470390000  | -0.890685000 |
| C  | -2.223855000 | 2.921296000  | 0.395428000  |
| H  | -1.360830000 | 3.253452000  | 0.963255000  |
| C  | -3.130805000 | 3.867001000  | -0.140670000 |
| H  | -4.900099000 | 4.203080000  | -1.303228000 |
| H  | -2.957177000 | 4.923243000  | 0.043179000  |
| Cl | 1.802573000  | 2.733412000  | -1.215574000 |
| Cl | 4.921665000  | 2.377743000  | -0.895859000 |
| Cl | 6.166076000  | -0.459002000 | -0.694115000 |
| Cl | 4.338122000  | -3.027502000 | -0.832888000 |
| C  | -1.660376000 | -2.491885000 | -1.057591000 |
| H  | -0.828846000 | -1.885511000 | -1.441038000 |
| C  | -2.479249000 | -3.025566000 | -2.230030000 |
| C  | -1.048456000 | -3.592561000 | -0.188785000 |
| H  | -0.446215000 | -3.166939000 | 0.617488000  |
| H  | -1.809354000 | -4.262126000 | 0.225549000  |
| H  | -0.370842000 | -4.182076000 | -0.809966000 |
| H  | -3.331413000 | -3.632391000 | -1.907389000 |
| H  | -1.831553000 | -3.665993000 | -2.836450000 |
| H  | -2.845533000 | -2.220351000 | -2.870949000 |
| C  | -3.439540000 | -2.145538000 | 1.394924000  |
| H  | -2.646999000 | -2.695864000 | 1.916238000  |
| C  | -4.500688000 | -3.123798000 | 0.891691000  |
| C  | -4.034666000 | -1.102255000 | 2.341160000  |
| H  | -3.265931000 | -0.442721000 | 2.752059000  |
| H  | -4.774461000 | -0.481534000 | 1.826153000  |
| H  | -4.535136000 | -1.606697000 | 3.173357000  |
| H  | -5.303611000 | -2.592989000 | 0.372151000  |
| H  | -4.947495000 | -3.644034000 | 1.744694000  |
| H  | -4.089455000 | -3.880331000 | 0.219493000  |
| O  | 0.375039000  | -1.086962000 | 1.478694000  |
| O  | 0.252416000  | 1.605434000  | 1.542128000  |
| C  | 1.493001000  | -0.416223000 | 1.679901000  |
| C  | 2.726783000  | -1.060881000 | 1.891143000  |
| C  | 3.860693000  | -0.306964000 | 2.142014000  |
| C  | 3.786823000  | 1.095299000  | 2.200742000  |
| C  | 2.579810000  | 1.759501000  | 2.027936000  |
| C  | 1.425125000  | 1.025579000  | 1.741828000  |
| H  | 2.513752000  | 2.841061000  | 2.062035000  |
| H  | 4.689595000  | 1.670067000  | 2.381396000  |
| H  | 4.816642000  | -0.802661000 | 2.274235000  |
| H  | 2.757319000  | -2.143859000 | 1.837032000  |

Σ of electronic & zero-point Energies -3699.298217

Σ of electronic & thermal Free Energies -3699.368091

#### TS1'

|    |              |              |              |
|----|--------------|--------------|--------------|
| Au | 0.972943000  | -0.255752000 | 0.446472000  |
| P  | 2.475232000  | 1.204677000  | -0.392148000 |
| O  | -0.634725000 | 1.335740000  | -0.437620000 |
| O  | -0.709222000 | -1.084736000 | -1.633311000 |
| C  | 2.488729000  | -1.571285000 | 0.355658000  |
| C  | 4.014336000  | 0.255759000  | -0.311627000 |
| C  | 3.793074000  | -1.102203000 | 0.039782000  |
| C  | 4.890391000  | -2.014547000 | 0.053821000  |
| C  | 6.179754000  | -1.510876000 | -0.246815000 |

|    |              |              |              |
|----|--------------|--------------|--------------|
| H  | 7.023338000  | -2.195579000 | -0.227251000 |
| C  | 6.373753000  | -0.185596000 | -0.565994000 |
| H  | 7.369891000  | 0.178148000  | -0.797023000 |
| C  | 5.283442000  | 0.708328000  | -0.614641000 |
| H  | 5.452304000  | 1.737556000  | -0.909045000 |
| C  | -1.749727000 | 0.773760000  | -0.623639000 |
| C  | -2.997219000 | 1.408018000  | -0.314437000 |
| C  | -4.198358000 | 0.757315000  | -0.503915000 |
| C  | -4.230178000 | -0.565441000 | -1.066289000 |
| C  | -3.071005000 | -1.203121000 | -1.434110000 |
| C  | -1.776667000 | -0.570005000 | -1.277017000 |
| C  | 4.640072000  | -3.374806000 | 0.359517000  |
| C  | 2.268835000  | -2.898987000 | 0.628619000  |
| H  | 1.265878000  | -3.248974000 | 0.846643000  |
| C  | 3.361106000  | -3.800881000 | 0.627119000  |
| H  | 5.471190000  | -4.073947000 | 0.371678000  |
| H  | 3.172793000  | -4.847019000 | 0.849383000  |
| Cl | -3.069161000 | -2.797485000 | -2.085896000 |
| Cl | -5.753647000 | -1.355681000 | -1.252613000 |
| Cl | -5.683964000 | 1.549837000  | -0.123435000 |
| Cl | -2.922798000 | 3.024489000  | 0.284764000  |
| C  | 2.053712000  | 1.619213000  | -2.155297000 |
| H  | 1.401192000  | 0.782030000  | -2.431147000 |
| C  | 3.276345000  | 1.628404000  | -3.071456000 |
| C  | 1.241495000  | 2.911953000  | -2.259269000 |
| H  | 0.363943000  | 2.886747000  | -1.612129000 |
| H  | 1.846507000  | 3.792553000  | -2.024045000 |
| H  | 0.895117000  | 3.019120000  | -3.291889000 |
| H  | 3.971277000  | 2.435198000  | -2.816702000 |
| H  | 2.940338000  | 1.798209000  | -4.099036000 |
| H  | 3.822884000  | 0.683698000  | -3.045136000 |
| C  | 2.556923000  | 2.709589000  | 0.659881000  |
| H  | 1.583112000  | 3.184560000  | 0.488988000  |
| C  | 3.684683000  | 3.659553000  | 0.251143000  |
| C  | 2.658373000  | 2.301515000  | 2.131048000  |
| H  | 1.773813000  | 1.748176000  | 2.453386000  |
| H  | 3.548805000  | 1.689517000  | 2.309443000  |
| H  | 2.741252000  | 3.202463000  | 2.747068000  |
| H  | 4.657442000  | 3.244732000  | 0.528670000  |
| H  | 3.566982000  | 4.606338000  | 0.786876000  |
| H  | 3.693387000  | 3.883699000  | -0.818795000 |
| O  | -0.379828000 | 0.815047000  | 2.058882000  |
| O  | -0.413228000 | -1.689747000 | 1.034431000  |
| C  | -1.480444000 | 0.176279000  | 2.077580000  |
| C  | -2.682023000 | 0.696197000  | 2.644263000  |
| C  | -3.839496000 | -0.036444000 | 2.601615000  |
| C  | -3.867591000 | -1.330027000 | 2.014592000  |
| C  | -2.724889000 | -1.907071000 | 1.507828000  |
| C  | -1.516180000 | -1.176095000 | 1.497564000  |
| H  | -2.730421000 | -2.894696000 | 1.059905000  |
| H  | -4.806148000 | -1.873048000 | 1.971084000  |
| H  | -4.758163000 | 0.380341000  | 3.002128000  |
| H  | -2.646434000 | 1.693262000  | 3.067746000  |

Σ of electronic & zero-point Energies -3699.278603

Σ of electronic & thermal Free Energies -3699.348696

#### TS2'

|    |              |              |              |
|----|--------------|--------------|--------------|
| Au | 0.920961000  | -0.283807000 | -0.049910000 |
| P  | 2.581023000  | 1.197717000  | -0.413863000 |
| O  | -0.585955000 | 1.159661000  | -0.309669000 |
| O  | -0.768738000 | -1.342569000 | -1.310923000 |
| C  | 2.408930000  | -1.600471000 | 0.194382000  |

|                                                             |              |              |              |                                                             |              |              |              |
|-------------------------------------------------------------|--------------|--------------|--------------|-------------------------------------------------------------|--------------|--------------|--------------|
| C                                                           | 4.061530000  | 0.172542000  | -0.277765000 | P                                                           | 2.456630000  | 1.258776000  | -0.381321000 |
| C                                                           | 3.758218000  | -1.178210000 | 0.037406000  | O                                                           | -0.548024000 | 1.138661000  | 0.222455000  |
| C                                                           | 4.821315000  | -2.115194000 | 0.201002000  | O                                                           | -0.834360000 | -0.384453000 | -1.980493000 |
| C                                                           | 6.150901000  | -1.648386000 | 0.055898000  | C                                                           | 2.567648000  | -1.576168000 | 0.152229000  |
| H                                                           | 6.966966000  | -2.355204000 | 0.179874000  | C                                                           | 4.030470000  | 0.393061000  | -0.198248000 |
| C                                                           | 6.420188000  | -0.329327000 | -0.234699000 | C                                                           | 3.866215000  | -0.998465000 | 0.044022000  |
| H                                                           | 7.447109000  | 0.006567000  | -0.337399000 | C                                                           | 5.024017000  | -1.822077000 | 0.177258000  |
| C                                                           | 5.369773000  | 0.597033000  | -0.406118000 | C                                                           | 6.298146000  | -1.209621000 | 0.083981000  |
| H                                                           | 5.601896000  | 1.630052000  | -0.640047000 | H                                                           | 7.182621000  | -1.831793000 | 0.191453000  |
| C                                                           | -1.760262000 | 0.638138000  | -0.520395000 | C                                                           | 6.429697000  | 0.142925000  | -0.137421000 |
| C                                                           | -2.943485000 | 1.374613000  | -0.305395000 | H                                                           | 7.416063000  | 0.590748000  | -0.204070000 |
| C                                                           | -4.190934000 | 0.785679000  | -0.487605000 | C                                                           | 5.287894000  | 0.957588000  | -0.287586000 |
| C                                                           | -4.287507000 | -0.537993000 | -0.995701000 | H                                                           | 5.409566000  | 2.017771000  | -0.480637000 |
| C                                                           | -3.144341000 | -1.263553000 | -1.283549000 | C                                                           | -1.731573000 | 0.775738000  | -0.145561000 |
| C                                                           | -1.843929000 | -0.714131000 | -1.065079000 | C                                                           | -2.895018000 | 1.275990000  | 0.486195000  |
| C                                                           | 4.497154000  | -3.461402000 | 0.499822000  | C                                                           | -4.157079000 | 0.859274000  | 0.084635000  |
| C                                                           | 2.125634000  | -2.913201000 | 0.485968000  | C                                                           | -4.303165000 | 0.000369000  | -1.048795000 |
| H                                                           | 1.095710000  | -3.228073000 | 0.614074000  | C                                                           | -3.200172000 | -0.434629000 | -1.750699000 |
| C                                                           | 3.183570000  | -3.843909000 | 0.632787000  | C                                                           | -1.863785000 | -0.051952000 | -1.365266000 |
| H                                                           | 5.299953000  | -4.182822000 | 0.621967000  | C                                                           | 4.849215000  | -3.210107000 | 0.399313000  |
| H                                                           | 2.940786000  | -4.877583000 | 0.860653000  | C                                                           | 2.434147000  | -2.928541000 | 0.361613000  |
| C                                                           | 2.412319000  | 1.959101000  | -2.091099000 | H                                                           | 1.445095000  | -3.366271000 | 0.436975000  |
| H                                                           | 2.064980000  | 1.108947000  | -2.691434000 | C                                                           | 3.585721000  | -3.743602000 | 0.482985000  |
| C                                                           | 3.727906000  | 2.462649000  | -2.684511000 | H                                                           | 5.726628000  | -3.842363000 | 0.500669000  |
| C                                                           | 1.310752000  | 3.022173000  | -2.076010000 | H                                                           | 3.456935000  | -4.808949000 | 0.649912000  |
| H                                                           | 0.391143000  | 2.645429000  | -1.620792000 | Cl                                                          | -3.337161000 | -1.486494000 | -3.109366000 |
| H                                                           | 1.626944000  | 3.917715000  | -1.533356000 | Cl                                                          | -5.886484000 | -0.509120000 | -1.516012000 |
| H                                                           | 1.091637000  | 3.320416000  | -3.105563000 | Cl                                                          | -5.561828000 | 1.460385000  | 0.889030000  |
| H                                                           | 4.159071000  | 3.279871000  | -2.099949000 | Cl                                                          | -2.681443000 | 2.418408000  | 1.764837000  |
| H                                                           | 3.532745000  | 2.847269000  | -3.690462000 | C                                                           | 2.225424000  | 1.871370000  | -2.109404000 |
| H                                                           | 4.468450000  | 1.664523000  | -2.768937000 | H                                                           | 1.971860000  | 0.948065000  | -2.644828000 |
| C                                                           | 2.547071000  | 2.446390000  | 0.937568000  | C                                                           | 3.486170000  | 2.470950000  | -2.730459000 |
| H                                                           | 1.520235000  | 2.832331000  | 0.902479000  | C                                                           | 1.016888000  | 2.806631000  | -2.173727000 |
| C                                                           | 3.551351000  | 3.581341000  | 0.734506000  | H                                                           | 0.140422000  | 2.356325000  | -1.704427000 |
| C                                                           | 2.759220000  | 1.727137000  | 2.271157000  | H                                                           | 1.224661000  | 3.763739000  | -1.685487000 |
| H                                                           | 1.990934000  | 0.970351000  | 2.439857000  | H                                                           | 0.779679000  | 3.010345000  | -3.221735000 |
| H                                                           | 3.749401000  | 1.262950000  | 2.314078000  | H                                                           | 3.808705000  | 3.379585000  | -2.214113000 |
| H                                                           | 2.689088000  | 2.458883000  | 3.081290000  | H                                                           | 3.270719000  | 2.743257000  | -3.768315000 |
| H                                                           | 4.579305000  | 3.206412000  | 0.745093000  | H                                                           | 4.315959000  | 1.760820000  | -2.735001000 |
| H                                                           | 3.455041000  | 4.289170000  | 1.563530000  | C                                                           | 2.242828000  | 2.583302000  | 0.873719000  |
| H                                                           | 3.388715000  | 4.134754000  | -0.192606000 | H                                                           | 1.209021000  | 2.909646000  | 0.703989000  |
| O                                                           | -0.328303000 | 0.876052000  | 2.376424000  | C                                                           | 3.206155000  | 3.755734000  | 0.694871000  |
| O                                                           | -0.428885000 | -1.630138000 | 1.272347000  | C                                                           | 2.331751000  | 1.960579000  | 2.269396000  |
| C                                                           | -1.418354000 | 0.296982000  | 2.308743000  | H                                                           | 1.554484000  | 1.208790000  | 2.427739000  |
| C                                                           | -2.656698000 | 0.865219000  | 2.799851000  | H                                                           | 3.311295000  | 1.500712000  | 2.436341000  |
| C                                                           | -3.826067000 | 0.181340000  | 2.691173000  | H                                                           | 2.196676000  | 2.747775000  | 3.017428000  |
| C                                                           | -3.883119000 | -1.126858000 | 2.101095000  | H                                                           | 4.242196000  | 3.446218000  | 0.860520000  |
| C                                                           | -2.759612000 | -1.746449000 | 1.636562000  | H                                                           | 2.972753000  | 4.523847000  | 1.438553000  |
| C                                                           | -1.490321000 | -1.079166000 | 1.681279000  | H                                                           | 3.131185000  | 4.218591000  | -0.291921000 |
| H                                                           | -2.789162000 | -2.733227000 | 1.187001000  | O                                                           | -0.263958000 | -0.410581000 | 2.461030000  |
| H                                                           | -4.844073000 | -1.626236000 | 2.028890000  | O                                                           | -0.402893000 | -1.963957000 | 0.221130000  |
| H                                                           | -4.750676000 | 0.630358000  | 3.041526000  | C                                                           | -1.369847000 | -0.880618000 | 2.138523000  |
| H                                                           | -2.606063000 | 1.859491000  | 3.229297000  | C                                                           | -2.581420000 | -0.680212000 | 2.892852000  |
| Cl                                                          | -3.219694000 | -2.883777000 | -1.870726000 | C                                                           | -3.759424000 | -1.220472000 | 2.471368000  |
| Cl                                                          | -5.846040000 | -1.251159000 | -1.214999000 | C                                                           | -3.834781000 | -2.020963000 | 1.288768000  |
| Cl                                                          | -5.626208000 | 1.685017000  | -0.148982000 | C                                                           | -2.716320000 | -2.299535000 | 0.545751000  |
| Cl                                                          | -2.781796000 | 3.013219000  | 0.219922000  | C                                                           | -1.470160000 | -1.713855000 | 0.894151000  |
| $\Sigma$ of electronic & zero-point Energies -3699.280766   |              |              |              | H                                                           | -2.756024000 | -2.913994000 | -0.347038000 |
| $\Sigma$ of electronic & thermal Free Energies -3699.349206 |              |              |              | H                                                           | -4.795167000 | -2.426075000 | 0.987173000  |
|                                                             |              |              |              | H                                                           | -4.670702000 | -1.035512000 | 3.031817000  |
|                                                             |              |              |              | H                                                           | -2.513323000 | -0.063391000 | 3.781577000  |
|                                                             |              |              |              | $\Sigma$ of electronic & zero-point Energies -3699.288337   |              |              |              |
|                                                             |              |              |              | $\Sigma$ of electronic & thermal Free Energies -3699.358090 |              |              |              |
| <b>INT'</b>                                                 |              |              |              |                                                             |              |              |              |
| Au                                                          | 0.967757000  | -0.368950000 | 0.054547000  |                                                             |              |              |              |

## RC2'

|    |              |              |              |
|----|--------------|--------------|--------------|
| Au | 1.086788000  | -0.231036000 | 0.838537000  |
| P  | 2.553520000  | 1.294731000  | 0.018196000  |
| O  | -1.500658000 | 2.327710000  | -1.197987000 |
| O  | -0.422696000 | -0.149378000 | -1.425639000 |
| C  | 2.419376000  | -1.577908000 | 0.175151000  |
| C  | 3.747612000  | 0.243565000  | -0.840437000 |
| C  | 3.531912000  | -1.140563000 | -0.597425000 |
| C  | 4.441094000  | -2.095775000 | -1.141955000 |
| C  | 5.528641000  | -1.621417000 | -1.916263000 |
| H  | 6.221381000  | -2.344413000 | -2.338644000 |
| C  | 5.713156000  | -0.275981000 | -2.141693000 |
| H  | 6.550285000  | 0.065679000  | -2.742167000 |
| C  | 4.820227000  | 0.671892000  | -1.597900000 |
| H  | 4.981919000  | 1.726994000  | -1.787468000 |
| C  | -2.233846000 | 1.353387000  | -1.109145000 |
| C  | -3.682447000 | 1.441612000  | -0.961614000 |
| C  | -4.459092000 | 0.320397000  | -0.879234000 |
| C  | -3.877090000 | -1.008671000 | -0.943578000 |
| C  | -2.525262000 | -1.181222000 | -1.079099000 |
| C  | -1.628939000 | -0.040341000 | -1.202404000 |
| C  | 4.211880000  | -3.470860000 | -0.890535000 |
| C  | 2.223297000  | -2.921275000 | 0.395238000  |
| H  | 1.360096000  | -3.253205000 | 0.962922000  |
| C  | 3.130076000  | -3.867198000 | -0.140761000 |
| H  | 4.899502000  | -4.203733000 | -1.302984000 |
| H  | 2.956093000  | -4.923405000 | 0.042955000  |
| C  | 1.661486000  | 2.491750000  | -1.058132000 |
| H  | 0.830490000  | 1.885363000  | -1.442581000 |
| C  | 2.481389000  | 3.025987000  | -2.229624000 |
| C  | 1.048553000  | 3.591981000  | -0.189509000 |
| H  | 0.445470000  | 3.166027000  | 0.615969000  |
| H  | 1.808928000  | 4.261486000  | 0.225865000  |
| H  | 0.371514000  | 4.181718000  | -0.811130000 |
| H  | 3.333301000  | 3.632631000  | -1.905994000 |
| H  | 1.834230000  | 3.666704000  | -2.836313000 |
| H  | 2.848169000  | 2.221033000  | -2.870590000 |
| C  | 3.439683000  | 2.145353000  | 1.395052000  |
| H  | 2.646863000  | 2.695106000  | 1.916566000  |
| C  | 4.500475000  | 3.124267000  | 0.892353000  |
| C  | 4.035196000  | 1.101932000  | 2.340933000  |
| H  | 3.266793000  | 0.441586000  | 2.751161000  |
| H  | 4.775637000  | 0.482047000  | 1.825858000  |
| H  | 4.534951000  | 1.606266000  | 3.173619000  |
| H  | 5.303331000  | 2.594134000  | 0.372012000  |
| H  | 4.947510000  | 3.643709000  | 1.745720000  |
| H  | 4.088832000  | 3.881375000  | 0.221068000  |
| O  | -0.375008000 | 1.087220000  | 1.478659000  |
| O  | -0.252591000 | -1.605150000 | 1.541689000  |
| C  | -1.492976000 | 0.416571000  | 1.679777000  |
| C  | -2.726760000 | 1.061260000  | 1.891069000  |
| C  | -3.860644000 | 0.307398000  | 2.142122000  |
| C  | -3.786830000 | -1.094879000 | 2.200940000  |
| C  | -2.579881000 | -1.759122000 | 2.027949000  |
| C  | -1.425228000 | -1.025241000 | 1.741620000  |
| H  | -2.757308000 | 2.144243000  | 1.836936000  |
| H  | -4.816560000 | 0.803140000  | 2.274433000  |
| H  | -4.689595000 | -1.669587000 | 2.381816000  |
| H  | -2.513836000 | -2.840685000 | 2.062106000  |
| Cl | -1.803092000 | -2.733522000 | -1.215198000 |
| Cl | -4.922095000 | -2.377725000 | -0.895222000 |
| Cl | -6.166420000 | 0.459129000  | -0.693840000 |
| Cl | -4.338379000 | 3.027532000  | -0.833365000 |

$\Sigma$  of electronic & zero-point Energies -3699.298218

$\Sigma$  of electronic & thermal Free Energies -3699.368099

**Optimization SOLVENT DCM, Singlet state,  
approach *trans* to P**

**(P,C)Au(O,O)H<sub>4</sub>**

|    |              |              |              |
|----|--------------|--------------|--------------|
| Au | 0.594555000  | 0.253560000  | -0.046680000 |
| P  | -1.130201000 | -1.237404000 | -0.043945000 |
| O  | 2.114927000  | -1.120516000 | 0.064147000  |
| O  | 2.129865000  | 1.589070000  | -0.078907000 |
| C  | -0.864658000 | 1.642063000  | -0.101954000 |
| C  | -2.572576000 | -0.149461000 | -0.014777000 |
| C  | -2.230069000 | 1.230300000  | -0.059339000 |
| C  | -3.272456000 | 2.205521000  | -0.057086000 |
| C  | -4.616403000 | 1.757416000  | 0.003763000  |
| H  | -5.411932000 | 2.497931000  | 0.008893000  |
| C  | -4.918644000 | 0.415000000  | 0.057366000  |
| H  | -5.953567000 | 0.090842000  | 0.105837000  |
| C  | -3.891872000 | -0.553890000 | 0.045139000  |
| H  | -4.149407000 | -1.606602000 | 0.078249000  |
| C  | 3.302441000  | -0.480544000 | 0.051858000  |
| C  | 4.512555000  | -1.173751000 | 0.110861000  |
| C  | 5.726525000  | -0.477745000 | 0.101276000  |
| C  | 5.733514000  | 0.913853000  | 0.031479000  |
| C  | 4.526532000  | 1.619918000  | -0.027585000 |
| C  | 3.310881000  | 0.935070000  | -0.018910000 |
| C  | -2.922046000 | 3.578329000  | -0.111220000 |
| C  | -0.565611000 | 2.986291000  | -0.154367000 |
| H  | 0.471524000  | 3.306163000  | -0.186569000 |
| C  | -1.600135000 | 3.953774000  | -0.161154000 |
| H  | -3.712864000 | 4.323385000  | -0.111276000 |
| H  | -1.335662000 | 5.006724000  | -0.203317000 |
| H  | 4.514253000  | 2.705683000  | -0.082196000 |
| H  | 6.673945000  | 1.458412000  | 0.022993000  |
| H  | 6.661638000  | -1.029565000 | 0.147929000  |
| H  | 4.489019000  | -2.259539000 | 0.164771000  |
| C  | -1.078009000 | -2.245820000 | -1.588403000 |
| H  | -0.795023000 | -1.497294000 | -2.339376000 |
| C  | -2.418087000 | -2.852826000 | -1.995688000 |
| C  | 0.044689000  | -3.278441000 | -1.477845000 |
| H  | 0.989226000  | -2.817826000 | -1.171596000 |
| H  | -0.209236000 | -4.065077000 | -0.760755000 |
| H  | 0.191709000  | -3.750531000 | -2.454325000 |
| H  | -2.785986000 | -3.573903000 | -1.261466000 |
| H  | -2.284275000 | -3.382619000 | -2.944691000 |
| H  | -3.181616000 | -2.086197000 | -2.146079000 |
| C  | -1.032718000 | -2.262127000 | 1.481516000  |
| H  | -0.039376000 | -2.721991000 | 1.403981000  |
| C  | -2.092631000 | -3.357226000 | 1.573494000  |
| C  | -1.056073000 | -1.334320000 | 2.696593000  |
| H  | -0.262968000 | -0.581844000 | 2.648104000  |
| H  | -2.017240000 | -0.817392000 | 2.780794000  |
| H  | -0.908031000 | -1.927025000 | 3.604621000  |
| H  | -3.100474000 | -2.935846000 | 1.624068000  |
| H  | -1.926415000 | -3.929062000 | 2.492401000  |
| H  | -2.043279000 | -4.053752000 | 0.733901000  |

$\Sigma$  of electronic & zero-point Energies -1479.846696

$\Sigma$  of electronic & thermal Free Energies -1479.900729

**(P,C)Au(O,O)-Cl<sub>4</sub>**

|    |              |              |              |
|----|--------------|--------------|--------------|
| Au | -0.549092000 | 0.228119000  | -0.059498000 |
| P  | -2.310364000 | -1.217226000 | -0.067060000 |
| O  | 0.961014000  | -1.181942000 | 0.021843000  |
| O  | 1.048568000  | 1.517032000  | -0.078624000 |
| C  | -1.971469000 | 1.649156000  | -0.078254000 |
| C  | -3.722964000 | -0.096331000 | 0.003548000  |
| C  | -3.344767000 | 1.273241000  | -0.022821000 |
| C  | -4.357628000 | 2.277393000  | 0.012399000  |
| C  | -5.712061000 | 1.864210000  | 0.086473000  |
| H  | -6.487102000 | 2.625356000  | 0.117192000  |
| C  | -6.049768000 | 0.529474000  | 0.121276000  |
| H  | -7.092342000 | 0.233026000  | 0.180241000  |
| C  | -5.051065000 | -0.467499000 | 0.076245000  |
| H  | -5.336553000 | -1.513399000 | 0.095104000  |
| C  | 2.145892000  | -0.581006000 | 0.012818000  |
| C  | 3.343016000  | -1.301356000 | 0.052733000  |
| C  | 4.586058000  | -0.646571000 | 0.049759000  |
| C  | 4.631272000  | 0.748932000  | 0.005335000  |
| C  | 3.432961000  | 1.482065000  | -0.036341000 |
| C  | 2.192838000  | 0.838686000  | -0.034751000 |
| C  | -3.967020000 | 3.640005000  | -0.022521000 |
| C  | -1.628470000 | 2.982499000  | -0.111204000 |
| H  | -0.583690000 | 3.274947000  | -0.151726000 |
| C  | -2.635779000 | 3.978552000  | -0.085315000 |
| H  | -4.735024000 | 4.407961000  | 0.003052000  |
| H  | -2.340879000 | 5.023653000  | -0.112007000 |
| C  | -2.290034000 | -2.189395000 | -1.634314000 |
| H  | -1.994420000 | -1.431444000 | -2.370702000 |
| C  | -3.652223000 | -2.748286000 | -2.039475000 |
| C  | -1.197512000 | -3.256649000 | -1.558186000 |
| H  | -0.234292000 | -2.835027000 | -1.255327000 |
| H  | -1.466888000 | -4.050897000 | -0.855604000 |
| H  | -1.076745000 | -3.710615000 | -2.546623000 |
| H  | -4.032053000 | -3.475985000 | -1.318042000 |
| H  | -3.542087000 | -3.259197000 | -3.001611000 |
| H  | -4.394867000 | -1.957037000 | -2.164260000 |
| C  | -2.200477000 | -2.269338000 | 1.437145000  |
| H  | -1.221285000 | -2.752869000 | 1.329367000  |
| C  | -3.287641000 | -3.338115000 | 1.525794000  |
| C  | -2.177275000 | -1.365305000 | 2.669829000  |
| H  | -1.362884000 | -0.635712000 | 2.623316000  |
| H  | -3.121548000 | -0.822997000 | 2.780395000  |
| H  | -2.031714000 | -1.981207000 | 3.562539000  |
| H  | -4.281883000 | -2.890856000 | 1.610876000  |
| H  | -3.114809000 | -3.936684000 | 2.426058000  |
| H  | -3.276108000 | -4.014015000 | 0.668151000  |
| Cl | 3.444340000  | 3.218293000  | -0.092989000 |
| Cl | 6.155217000  | 1.578879000  | -0.000201000 |
| Cl | 6.053065000  | -1.572095000 | 0.101651000  |
| Cl | 3.239668000  | -3.034892000 | 0.106778000  |

Sum of electronic and zero-point Energies= -  
3318.066897

Sum of electronic and thermal Free Energies= -  
3318.128680

**Quinone-H4**

|   |              |              |              |
|---|--------------|--------------|--------------|
| O | 1.729622000  | 1.372051000  | -0.000219000 |
| O | 1.729615000  | -1.372058000 | 0.000133000  |
| C | 0.664115000  | 0.777557000  | -0.000034000 |
| C | -0.634640000 | 1.453264000  | -0.000148000 |

|   |              |              |              |
|---|--------------|--------------|--------------|
| C | -1.773411000 | 0.729611000  | -0.000071000 |
| C | -1.773415000 | -0.729605000 | 0.000081000  |
| C | -0.634647000 | -1.453262000 | 0.000159000  |
| C | 0.664111000  | -0.777559000 | 0.000138000  |
| H | -0.636432000 | -2.539080000 | 0.000248000  |
| H | -2.736863000 | -1.231512000 | 0.000111000  |
| H | -2.736857000 | 1.231523000  | -0.000142000 |
| H | -0.636421000 | 2.539082000  | -0.000289000 |

Σ of electronic & zero-point Energies -381.246708

Σ of electronic & thermal Free Energies -381.277436

**Quinone-Cl4**

|    |              |              |              |
|----|--------------|--------------|--------------|
| O  | -1.359818000 | 2.779445000  | 0.000194000  |
| O  | 1.359818000  | 2.779445000  | -0.000178000 |
| C  | -0.772751000 | 1.720323000  | 0.000071000  |
| C  | -1.453307000 | 0.415139000  | 0.000070000  |
| C  | -0.738014000 | -0.739371000 | 0.000021000  |
| C  | 0.738014000  | -0.739371000 | -0.000026000 |
| C  | 1.453307000  | 0.415139000  | -0.000069000 |
| C  | 0.772751000  | 1.720323000  | -0.000065000 |
| Cl | 3.167079000  | 0.453412000  | -0.000135000 |
| Cl | 1.540955000  | -2.254124000 | -0.000026000 |
| Cl | -1.540955000 | -2.254124000 | 0.000014000  |
| Cl | -3.167079000 | 0.453412000  | 0.000138000  |

Σ of electronic & zero-point Energies -2219.449203

Σ of electronic & thermal Free Energies -2219.489118

**RC1**

|    |              |              |              |
|----|--------------|--------------|--------------|
| Au | -1.089306000 | -0.243120000 | 0.685295000  |
| P  | -2.672323000 | 1.260911000  | 0.030939000  |
| O  | 0.371149000  | 1.082218000  | 1.357420000  |
| O  | 0.309313000  | -1.611872000 | 1.370544000  |
| C  | -2.461723000 | -1.609110000 | 0.152636000  |
| C  | -4.090086000 | 0.191349000  | -0.305702000 |
| C  | -3.765671000 | -1.189675000 | -0.234242000 |
| C  | -4.753159000 | -2.160632000 | -0.577022000 |
| C  | -6.040183000 | -1.703763000 | -0.958143000 |
| H  | -6.798936000 | -2.438592000 | -1.213410000 |
| C  | -6.331136000 | -0.358905000 | -1.012359000 |
| H  | -7.321160000 | -0.027566000 | -1.309944000 |
| C  | -5.349520000 | 0.604751000  | -0.693273000 |
| H  | -5.594080000 | 1.658508000  | -0.760100000 |
| C  | 1.479801000  | 0.433612000  | 1.629278000  |
| C  | 2.677470000  | 1.098130000  | 1.963724000  |
| C  | 3.801890000  | 0.365934000  | 2.296557000  |
| C  | 3.754355000  | -1.043390000 | 2.345237000  |
| C  | 2.589432000  | -1.728078000 | 2.050159000  |
| C  | 1.441921000  | -1.013831000 | 1.658907000  |
| C  | -4.403157000 | -3.533572000 | -0.528511000 |
| C  | -2.149924000 | -2.949646000 | 0.174675000  |
| H  | -1.152256000 | -3.272621000 | 0.454184000  |
| C  | -3.131695000 | -3.912543000 | -0.166912000 |
| H  | -5.152067000 | -4.276664000 | -0.787519000 |
| H  | -2.865067000 | -4.965217000 | -0.138975000 |
| H  | 2.541874000  | -2.811228000 | 2.082988000  |
| H  | 4.646347000  | -1.598347000 | 2.618990000  |
| H  | 4.728620000  | 0.879936000  | 2.530997000  |
| H  | 2.690234000  | 2.182932000  | 1.938617000  |
| C  | -2.967067000 | 2.449604000  | 1.412822000  |
| H  | -2.846260000 | 1.813008000  | 2.298109000  |
| C  | -4.370476000 | 3.050186000  | 1.443249000  |



|    |              |              |              |
|----|--------------|--------------|--------------|
| C  | -1.862808000 | 3.508508000  | 1.413499000  |
| H  | -0.866630000 | 3.058710000  | 1.391185000  |
| H  | -1.961880000 | 4.187237000  | 0.561324000  |
| H  | -1.947433000 | 4.104073000  | 2.327953000  |
| H  | -4.579786000 | 3.658051000  | 0.559402000  |
| H  | -4.446119000 | 3.701419000  | 2.320300000  |
| H  | -5.140681000 | 2.280680000  | 1.531511000  |
| C  | -2.156491000 | 2.090595000  | -1.525866000 |
| H  | -1.218200000 | 2.585828000  | -1.254247000 |
| C  | -3.175511000 | 3.117442000  | -2.015613000 |
| C  | -1.854978000 | 1.024440000  | -2.577981000 |
| H  | -1.057448000 | 0.355091000  | -2.246330000 |
| H  | -2.748207000 | 0.439144000  | -2.820111000 |
| H  | -1.520683000 | 1.522293000  | -3.494037000 |
| H  | -4.122637000 | 2.641586000  | -2.286218000 |
| H  | -2.777809000 | 3.598356000  | -2.915306000 |
| H  | -3.372735000 | 3.899485000  | -1.279307000 |
| O  | 1.019194000  | 1.690874000  | -1.272739000 |
| O  | 0.706106000  | -1.010015000 | -1.403750000 |
| C  | 1.997864000  | 0.966322000  | -1.129950000 |
| C  | 3.353665000  | 1.475456000  | -0.952600000 |
| C  | 4.422909000  | 0.637688000  | -0.806303000 |
| C  | 4.249850000  | -0.800241000 | -0.819555000 |
| C  | 3.011430000  | -1.357234000 | -0.994134000 |
| C  | 1.821509000  | -0.538694000 | -1.173138000 |
| Cl | 2.783307000  | -3.063024000 | -1.085533000 |
| Cl | 5.645411000  | -1.806477000 | -0.669600000 |
| Cl | 6.011032000  | 1.278603000  | -0.592107000 |
| Cl | 3.521773000  | 3.192007000  | -0.919868000 |

$\Sigma$  of electronic & zero-point Energies -3699.341066

$\Sigma$  of electronic & thermal Free Energies -3699.411312

### TS1

|    |              |              |              |
|----|--------------|--------------|--------------|
| Au | 0.995436000  | 0.172918000  | 0.296088000  |
| P  | 2.833282000  | -1.160262000 | 0.232246000  |
| O  | -0.360790000 | -1.352813000 | 0.833639000  |
| O  | -0.419262000 | 1.135517000  | 1.934360000  |
| C  | 2.273586000  | 1.618641000  | -0.243494000 |
| C  | 4.133724000  | -0.001578000 | -0.244750000 |
| C  | 3.651349000  | 1.319657000  | -0.428276000 |
| C  | 4.558379000  | 2.353473000  | -0.805750000 |
| C  | 5.920608000  | 2.010325000  | -0.997212000 |
| H  | 6.618294000  | 2.791463000  | -1.286733000 |
| C  | 6.361438000  | 0.716875000  | -0.823656000 |
| H  | 7.407983000  | 0.473422000  | -0.977861000 |
| C  | 5.466617000  | -0.306050000 | -0.440868000 |
| H  | 5.835182000  | -1.316475000 | -0.304909000 |
| C  | -1.454406000 | -0.919169000 | 1.375644000  |
| C  | -2.608976000 | -1.737155000 | 1.469797000  |
| C  | -3.753372000 | -1.246311000 | 2.052029000  |
| C  | -3.783237000 | 0.052923000  | 2.631613000  |
| C  | -2.682438000 | 0.868191000  | 2.603617000  |
| C  | -1.477490000 | 0.433142000  | 1.972490000  |
| C  | 4.057093000  | 3.669270000  | -0.972108000 |
| C  | 1.815121000  | 2.904077000  | -0.413822000 |
| H  | 0.761694000  | 3.130002000  | -0.287650000 |
| C  | 2.721680000  | 3.932081000  | -0.776801000 |
| H  | 4.743197000  | 4.461880000  | -1.256798000 |
| H  | 2.341157000  | 4.941298000  | -0.905696000 |
| H  | -2.694324000 | 1.860785000  | 3.040630000  |
| H  | -4.699439000 | 0.398008000  | 3.101169000  |
| H  | -4.647421000 | -1.860946000 | 2.082842000  |

|    |              |              |              |
|----|--------------|--------------|--------------|
| H  | -2.569896000 | -2.731012000 | 1.036140000  |
| C  | 3.125521000  | -1.876369000 | 1.910162000  |
| H  | 2.849750000  | -1.042185000 | 2.566858000  |
| C  | 4.583910000  | -2.241849000 | 2.182182000  |
| C  | 2.163598000  | -3.038949000 | 2.155023000  |
| H  | 1.127380000  | -2.762531000 | 1.942251000  |
| H  | 2.426461000  | -3.907692000 | 1.544415000  |
| H  | 2.230421000  | -3.334971000 | 3.206458000  |
| H  | 4.942215000  | -3.037696000 | 1.524596000  |
| H  | 4.657254000  | -2.603855000 | 3.212969000  |
| H  | 5.245627000  | -1.378615000 | 2.083730000  |
| C  | 2.576338000  | -2.438731000 | -1.063272000 |
| H  | 1.674968000  | -2.966718000 | -0.728290000 |
| C  | 3.740332000  | -3.424444000 | -1.165688000 |
| C  | 2.288899000  | -1.744272000 | -2.393599000 |
| H  | 1.411813000  | -1.096595000 | -2.324400000 |
| H  | 3.149291000  | -1.153477000 | -2.723786000 |
| H  | 2.089924000  | -2.506599000 | -3.153425000 |
| H  | 4.658092000  | -2.922381000 | -1.484334000 |
| H  | 3.491355000  | -4.173086000 | -1.924689000 |
| H  | 3.930320000  | -3.950124000 | -0.227870000 |
| O  | -0.948644000 | -1.065883000 | -1.791558000 |
| O  | -0.751345000 | 1.419571000  | -0.707003000 |
| C  | -1.970976000 | -0.514871000 | -1.370707000 |
| C  | -3.287222000 | -1.120762000 | -1.421171000 |
| C  | -4.409043000 | -0.457828000 | -0.988677000 |
| C  | -4.315682000 | 0.871696000  | -0.458610000 |
| C  | -3.091526000 | 1.501518000  | -0.368682000 |
| C  | -1.875735000 | 0.847219000  | -0.761891000 |
| Cl | -2.955248000 | 3.137674000  | 0.169728000  |
| Cl | -5.759885000 | 1.703047000  | 0.004473000  |
| Cl | -5.959266000 | -1.220822000 | -1.067739000 |
| Cl | -3.363731000 | -2.728377000 | -2.051579000 |

$\Sigma$  of electronic & zero-point Energies -3699.326429

$\Sigma$  of electronic & thermal Free Energies -3699.394664

### TS2

|    |              |              |              |
|----|--------------|--------------|--------------|
| Au | 0.912860000  | 0.149834000  | -0.098505000 |
| P  | 2.748924000  | -1.158354000 | 0.219826000  |
| O  | -0.398755000 | -1.366778000 | 1.238876000  |
| O  | -0.378919000 | 1.125900000  | 2.360893000  |
| C  | 2.257981000  | 1.610638000  | -0.429926000 |
| C  | 4.101148000  | 0.009280000  | -0.050264000 |
| C  | 3.646127000  | 1.315459000  | -0.363534000 |
| C  | 4.594340000  | 2.353512000  | -0.609186000 |
| C  | 5.972444000  | 2.028565000  | -0.543140000 |
| H  | 6.700661000  | 2.813161000  | -0.729484000 |
| C  | 6.389549000  | 0.750427000  | -0.245626000 |
| H  | 7.449379000  | 0.520789000  | -0.198100000 |
| C  | 5.451873000  | -0.273690000 | 0.008242000  |
| H  | 5.803591000  | -1.268403000 | 0.255440000  |
| C  | -1.472416000 | -0.869543000 | 1.667051000  |
| C  | -2.714224000 | -1.593816000 | 1.654804000  |
| C  | -3.852738000 | -1.021251000 | 2.138994000  |
| C  | -3.843621000 | 0.296714000  | 2.715641000  |
| C  | -2.706031000 | 1.035828000  | 2.793958000  |
| C  | -1.451341000 | 0.514439000  | 2.290643000  |
| C  | 4.120298000  | 3.657273000  | -0.900025000 |
| C  | 1.821479000  | 2.883512000  | -0.707683000 |
| H  | 0.760927000  | 3.105911000  | -0.746580000 |
| C  | 2.770129000  | 3.910802000  | -0.941198000 |
| H  | 4.840102000  | 4.449381000  | -1.084962000 |

|    |              |              |              |   |              |              |              |
|----|--------------|--------------|--------------|---|--------------|--------------|--------------|
| H  | 2.408862000  | 4.911773000  | -1.158521000 | C | -1.773215000 | 2.969408000  | 0.350135000  |
| H  | -2.695349000 | 2.031040000  | 3.225971000  | H | -0.717453000 | 3.191027000  | 0.239665000  |
| H  | -4.779272000 | 0.700606000  | 3.091284000  | C | -2.686579000 | 4.014900000  | 0.634909000  |
| H  | -4.790477000 | -1.567002000 | 2.105165000  | H | -4.722690000 | 4.569477000  | 1.015031000  |
| H  | -2.710848000 | -2.590823000 | 1.226502000  | H | -2.306364000 | 5.027573000  | 0.734067000  |
| C  | 2.768600000  | -1.880806000 | 1.924764000  | H | 2.753396000  | -0.010926000 | -3.725103000 |
| H  | 2.199750000  | -1.141140000 | 2.499423000  | H | 4.757505000  | -1.199534000 | -2.876979000 |
| C  | 4.171047000  | -1.987841000 | 2.519677000  | H | 4.654655000  | -2.550335000 | -0.805620000 |
| C  | 2.019100000  | -3.213235000 | 1.958761000  | H | 2.535841000  | -2.774647000 | 0.466591000  |
| H  | 1.021518000  | -3.132299000 | 1.523724000  | C | -3.035354000 | -1.785527000 | -1.912961000 |
| H  | 2.576201000  | -4.000074000 | 1.442437000  | H | -2.731729000 | -0.931894000 | -2.531181000 |
| H  | 1.905014000  | -3.517163000 | 3.004189000  | C | -4.481892000 | -2.139626000 | -2.253747000 |
| H  | 4.806683000  | -2.674983000 | 1.954111000  | C | -2.065362000 | -2.941252000 | -2.154526000 |
| H  | 4.080317000  | -2.380160000 | 3.537880000  | H | -1.037716000 | -2.666870000 | -1.906480000 |
| H  | 4.668280000  | -1.017248000 | 2.577146000  | H | -2.343301000 | -3.822367000 | -1.568485000 |
| C  | 2.779687000  | -2.462106000 | -1.079129000 | H | -2.100137000 | -3.215705000 | -3.213197000 |
| H  | 1.925314000  | -3.102003000 | -0.828659000 | H | -4.866636000 | -2.952985000 | -1.633415000 |
| C  | 4.068209000  | -3.284074000 | -1.037888000 | H | -4.516060000 | -2.471416000 | -3.296589000 |
| C  | 2.550604000  | -1.830496000 | -2.451886000 | H | -5.146013000 | -1.278132000 | -2.155580000 |
| H  | 1.580094000  | -1.331457000 | -2.510155000 | C | -2.648896000 | -2.432756000 | 1.073481000  |
| H  | 3.334934000  | -1.104380000 | -2.689487000 | H | -1.734536000 | -2.958859000 | 0.771920000  |
| H  | 2.577163000  | -2.616578000 | -3.213194000 | C | -3.818415000 | -3.415331000 | 1.098359000  |
| H  | 4.924457000  | -2.684204000 | -1.357955000 | C | -2.415558000 | -1.769006000 | 2.431212000  |
| H  | 3.969898000  | -4.122570000 | -1.734650000 | H | -1.533402000 | -1.122587000 | 2.420809000  |
| H  | 4.278097000  | -3.694545000 | -0.047378000 | H | -3.282991000 | -1.174590000 | 2.735438000  |
| O  | -0.748122000 | -1.109340000 | -1.319241000 | H | -2.257732000 | -2.548027000 | 3.183610000  |
| O  | -0.715973000 | 1.432943000  | -0.408650000 | H | -4.753967000 | -2.918254000 | 1.369483000  |
| C  | -1.859446000 | -0.540288000 | -1.087171000 | H | -3.615386000 | -4.176324000 | 1.858826000  |
| C  | -3.124775000 | -1.165675000 | -1.293066000 | H | -3.952851000 | -3.926264000 | 0.142554000  |
| C  | -4.313494000 | -0.511171000 | -1.010864000 | O | 0.844630000  | -0.074031000 | 2.006807000  |
| C  | -4.295757000 | 0.815096000  | -0.514931000 | O | 0.719326000  | 1.479004000  | -0.213934000 |
| C  | -3.082609000 | 1.480002000  | -0.345021000 | C | 1.903947000  | 0.188768000  | 1.407868000  |
| C  | -1.855600000 | 0.824880000  | -0.572286000 | C | 3.202584000  | -0.278113000 | 1.822950000  |
| Cl | -3.029345000 | 3.137583000  | 0.152274000  | C | 4.352188000  | 0.066010000  | 1.144246000  |
| Cl | -5.785307000 | 1.634252000  | -0.187272000 | C | 4.292066000  | 0.909896000  | -0.003042000 |
| Cl | -5.827821000 | -1.321475000 | -1.232931000 | C | 3.069724000  | 1.401852000  | -0.440977000 |
| Cl | -3.105430000 | -2.793044000 | -1.883421000 | C | 1.854808000  | 1.014483000  | 0.179943000  |

Σ of electronic & zero-point Energies -3699.324050

Σ of electronic & thermal Free Energies -3699.393015

### INT

|    |              |              |              |
|----|--------------|--------------|--------------|
| Au | -0.949654000 | 0.162475000  | -0.123771000 |
| P  | -2.814879000 | -1.123089000 | -0.204952000 |
| O  | 0.322972000  | -1.568496000 | -0.198616000 |
| O  | 0.421672000  | -0.103661000 | -2.498650000 |
| C  | -2.225982000 | 1.676753000  | 0.219811000  |
| C  | -4.106667000 | 0.066718000  | 0.209723000  |
| C  | -3.614380000 | 1.390192000  | 0.360770000  |
| C  | -4.528982000 | 2.444369000  | 0.658301000  |
| C  | -5.900849000 | 2.120811000  | 0.8111712000 |
| H  | -6.599992000 | 2.919854000  | 1.043081000  |
| C  | -6.348789000 | 0.825941000  | 0.673615000  |
| H  | -7.402837000 | 0.597817000  | 0.797010000  |
| C  | -5.449342000 | -0.216865000 | 0.363851000  |
| H  | -5.820972000 | -1.228254000 | 0.245172000  |
| C  | 1.429955000  | -1.455866000 | -0.835087000 |
| C  | 2.593316000  | -2.171434000 | -0.433400000 |
| C  | 3.758381000  | -2.038942000 | -1.141807000 |
| C  | 3.814958000  | -1.258651000 | -2.340952000 |
| C  | 2.720022000  | -0.600475000 | -2.815147000 |
| C  | 1.465757000  | -0.654652000 | -2.105422000 |
| C  | -4.028957000 | 3.764285000  | 0.790444000  |

Σ of electronic & zero-point Energies -3699.333414

Σ of electronic & thermal Free Energies -3699.403563

### RC2

|    |              |              |              |
|----|--------------|--------------|--------------|
| Au | 0.928668000  | 0.346755000  | -0.506855000 |
| P  | 2.616692000  | -1.168216000 | -0.306686000 |
| O  | -0.954391000 | -2.660621000 | 2.087260000  |
| O  | -0.076674000 | -0.069853000 | 2.144619000  |
| C  | 2.341261000  | 1.685027000  | -0.012307000 |
| C  | 3.954375000  | -0.149892000 | 0.358187000  |
| C  | 3.632692000  | 1.233826000  | 0.380374000  |
| C  | 4.619583000  | 2.177061000  | 0.794419000  |
| C  | 5.892333000  | 1.689691000  | 1.185448000  |
| H  | 6.646003000  | 2.402673000  | 1.508721000  |
| C  | 6.176943000  | 0.342740000  | 1.160029000  |
| H  | 7.156851000  | -0.012564000 | 1.463273000  |
| C  | 5.206583000  | -0.592063000 | 0.737334000  |
| H  | 5.457024000  | -1.646414000 | 0.715221000  |
| C  | -1.776392000 | -1.757633000 | 2.170807000  |
| C  | -3.210294000 | -1.987181000 | 2.300014000  |
| C  | -4.059741000 | -0.941946000 | 2.421876000  |

|                                                             |              |              |              |    |              |              |              |
|-------------------------------------------------------------|--------------|--------------|--------------|----|--------------|--------------|--------------|
| C                                                           | -3.599806000 | 0.434032000  | 2.420452000  | H  | -3.258254000 | -4.862134000 | -0.566890000 |
| C                                                           | -2.289491000 | 0.753861000  | 2.299782000  | C  | -1.392797000 | -3.840547000 | -0.198996000 |
| C                                                           | -1.286013000 | -0.292813000 | 2.188509000  | H  | -0.977619000 | -4.669948000 | 0.360563000  |
| C                                                           | 4.285616000  | 3.554909000  | 0.797140000  | C  | 3.540222000  | 1.482209000  | 0.131925000  |
| C                                                           | 2.049950000  | 3.030258000  | -0.000652000 | C  | 4.671732000  | 2.077011000  | 0.740743000  |
| H                                                           | 1.063227000  | 3.378435000  | -0.289466000 | C  | 4.906288000  | 3.417864000  | 0.561279000  |
| C                                                           | 3.033081000  | 3.966037000  | 0.406217000  | C  | 4.038087000  | 4.221103000  | -0.234284000 |
| H                                                           | 5.033880000  | 4.276384000  | 1.112911000  | C  | 2.934973000  | 3.684073000  | -0.848992000 |
| H                                                           | 2.781272000  | 5.022700000  | 0.410046000  | C  | 2.649962000  | 2.307771000  | -0.680096000 |
| H                                                           | -1.943117000 | 1.782377000  | 2.298241000  | C  | -3.116790000 | -0.570014000 | -2.279446000 |
| H                                                           | -4.342921000 | 1.219137000  | 2.519821000  | C  | -1.063141000 | 0.682577000  | -1.948878000 |
| H                                                           | -5.126983000 | -1.118139000 | 2.517739000  | H  | -0.511571000 | 1.608548000  | -2.065435000 |
| H                                                           | -3.555883000 | -3.015646000 | 2.287539000  | C  | -2.390311000 | 0.586263000  | -2.430161000 |
| C                                                           | 2.070667000  | -2.531114000 | 0.805174000  | H  | -4.139714000 | -0.629053000 | -2.637897000 |
| H                                                           | 1.387967000  | -2.019649000 | 1.495762000  | H  | -2.836836000 | 1.453303000  | -2.906165000 |
| C                                                           | 3.201000000  | -3.177889000 | 1.601666000  | H  | 2.254506000  | 4.279202000  | -1.446593000 |
| C                                                           | 1.249319000  | -3.539899000 | 0.001435000  | H  | 4.254474000  | 5.279056000  | -0.344697000 |
| H                                                           | 0.433976000  | -3.051646000 | -0.537600000 | H  | 5.764182000  | 3.882983000  | 1.036796000  |
| H                                                           | 1.870640000  | -4.099779000 | -0.704054000 | H  | 5.318229000  | 1.452670000  | 1.347573000  |
| H                                                           | 0.800748000  | -4.251295000 | 0.699383000  | C  | 2.106468000  | -3.351317000 | -1.012772000 |
| H                                                           | 3.929544000  | -3.679618000 | 0.958965000  | H  | 1.792251000  | -3.024002000 | -2.011695000 |
| H                                                           | 2.762464000  | -3.934392000 | 2.260846000  | C  | 1.847716000  | -4.851475000 | -0.877745000 |
| H                                                           | 3.724569000  | -2.453409000 | 2.229852000  | C  | 3.580249000  | -2.994496000 | -0.810329000 |
| C                                                           | 3.105052000  | -1.775739000 | -1.975321000 | H  | 3.763984000  | -1.922140000 | -0.912765000 |
| H                                                           | 2.208391000  | -2.292361000 | -2.338331000 | H  | 3.935449000  | -3.299559000 | 0.179165000  |
| C                                                           | 4.274352000  | -2.758189000 | -1.918900000 | H  | 4.187110000  | -3.521484000 | -1.553000000 |
| C                                                           | 3.402188000  | -0.585390000 | -2.885976000 | H  | 2.071718000  | -5.213031000 | 0.131485000  |
| H                                                           | 2.547083000  | 0.092702000  | -2.960147000 | H  | 2.497474000  | -5.396057000 | -1.570113000 |
| H                                                           | 4.263650000  | -0.015085000 | -2.524308000 | H  | 0.813566000  | -5.107064000 | -1.118199000 |
| H                                                           | 3.636731000  | -0.952151000 | -3.890147000 | C  | 1.523700000  | -2.843517000 | 1.846587000  |
| H                                                           | 5.183545000  | -2.269145000 | -1.557570000 | H  | 2.324048000  | -3.573733000 | 1.667626000  |
| H                                                           | 4.474059000  | -3.124988000 | -2.930919000 | C  | 0.394417000  | -3.530508000 | 2.614447000  |
| H                                                           | 4.064447000  | -3.622538000 | -1.285131000 | C  | 2.115036000  | -1.646227000 | 2.594982000  |
| O                                                           | -0.620713000 | -0.967153000 | -0.956612000 | H  | 2.985814000  | -1.235572000 | 2.079417000  |
| O                                                           | -0.621295000 | 1.707765000  | -0.645224000 | H  | 1.367981000  | -0.856127000 | 2.692425000  |
| C                                                           | -1.775833000 | -0.349676000 | -0.825072000 | H  | 2.427246000  | -1.981273000 | 3.589668000  |
| C                                                           | -2.999601000 | -1.035489000 | -0.856065000 | H  | -0.489607000 | -2.893187000 | 2.655885000  |
| C                                                           | -4.212517000 | -0.348410000 | -0.726124000 | H  | 0.741942000  | -3.716481000 | 3.635680000  |
| C                                                           | -4.212627000 | 1.049034000  | -0.593646000 | H  | 0.130057000  | -4.497698000 | 2.178538000  |
| C                                                           | -3.001148000 | 1.752169000  | -0.598849000 | O  | -0.747776000 | -0.848780000 | 1.954167000  |
| C                                                           | -1.779029000 | 1.076330000  | -0.683008000 | O  | 0.664404000  | 1.447325000  | 1.560475000  |
| Cl                                                          | -2.960112000 | 3.475020000  | -0.407564000 | C  | -1.340700000 | 0.178725000  | 1.562039000  |
| Cl                                                          | -5.709310000 | 1.906628000  | -0.430081000 | C  | -2.749041000 | 0.194475000  | 1.269113000  |
| Cl                                                          | -5.706972000 | -1.224187000 | -0.751204000 | C  | -3.363360000 | 1.294284000  | 0.706014000  |
| Cl                                                          | -2.955534000 | -2.751405000 | -1.092138000 | C  | -2.615721000 | 2.485442000  | 0.449863000  |
| $\Sigma$ of electronic & zero-point Energies -3699.343443   |              |              |              | C  | -1.277823000 | 2.558993000  | 0.785987000  |
| $\Sigma$ of electronic & thermal Free Energies -3699.414591 |              |              |              | C  | -0.568913000 | 1.434049000  | 1.336607000  |
|                                                             |              |              |              | Cl | -0.354834000 | 3.991593000  | 0.494291000  |
|                                                             |              |              |              | Cl | -3.400628000 | 3.824053000  | -0.314193000 |
|                                                             |              |              |              | Cl | -5.038205000 | 1.237741000  | 0.282209000  |
|                                                             |              |              |              | Cl | -3.623455000 | -1.255989000 | 1.611189000  |

### **Optimisation GAS PHASE, Triplet state**

#### **RC1<sup>T</sup>**

|    |              |              |              |
|----|--------------|--------------|--------------|
| Au | 1.338966000  | -0.188668000 | -0.508125000 |
| P  | 1.028866000  | -2.360424000 | 0.124352000  |
| O  | 3.278519000  | 0.220687000  | 0.246030000  |
| O  | 1.637708000  | 1.743446000  | -1.251976000 |
| C  | -0.499339000 | -0.388690000 | -1.296620000 |
| C  | -0.674216000 | -2.677359000 | -0.385412000 |
| C  | -1.229048000 | -1.591713000 | -1.110606000 |
| C  | -2.554920000 | -1.692005000 | -1.623227000 |
| C  | -3.263501000 | -2.899946000 | -1.414153000 |
| H  | -4.278530000 | -2.979299000 | -1.792428000 |
| C  | -2.696055000 | -3.947689000 | -0.726423000 |

#### **INT<sup>T</sup>**

|    |              |              |              |
|----|--------------|--------------|--------------|
| Au | 0.845503000  | -0.097035000 | -0.235235000 |
| P  | 2.643372000  | 0.959961000  | 0.620292000  |
| O  | -0.503485000 | 1.249716000  | 0.678723000  |
| O  | 0.201993000  | 2.000222000  | -1.882363000 |
| C  | 2.170096000  | -1.463388000 | -0.881962000 |
| C  | 3.992826000  | -0.148442000 | 0.158162000  |
| C  | 3.549022000  | -1.285046000 | -0.572189000 |

$\Sigma$  of electronic & zero-point Energies -3699.282060  
 $\Sigma$  of electronic & thermal Free Energies -3699.352621

|                                                      |              |              |              |    |              |              |              |
|------------------------------------------------------|--------------|--------------|--------------|----|--------------|--------------|--------------|
| C                                                    | 4.505649000  | -2.255675000 | -0.996555000 | O  | 1.729859000  | 2.243899000  | -1.316590000 |
| C                                                    | 5.866509000  | -2.049465000 | -0.661511000 | C  | -0.259408000 | -0.613860000 | -1.166623000 |
| H                                                    | 6.597999000  | -2.786836000 | -0.981243000 | C  | 0.483871000  | -2.802795000 | -0.322297000 |
| C                                                    | 6.269392000  | -0.943302000 | 0.052398000  | C  | -0.489362000 | -2.001215000 | -0.974925000 |
| H                                                    | 7.317524000  | -0.805274000 | 0.298072000  | C  | -1.706050000 | -2.588422000 | -1.422106000 |
| C                                                    | 5.328417000  | 0.022126000  | 0.467501000  | C  | -1.924430000 | -3.958001000 | -1.131490000 |
| H                                                    | 5.665487000  | 0.892912000  | 1.018713000  | H  | -2.864430000 | -4.410890000 | -1.433765000 |
| C                                                    | -1.346827000 | 1.878918000  | -0.090471000 | C  | -0.978676000 | -4.709271000 | -0.469775000 |
| C                                                    | -2.630277000 | 2.209038000  | 0.385710000  | H  | -1.172375000 | -5.754696000 | -0.252050000 |
| C                                                    | -3.539153000 | 2.836419000  | -0.441842000 | C  | 0.251387000  | -4.138527000 | -0.074058000 |
| C                                                    | -3.196473000 | 3.188283000  | -1.775038000 | H  | 0.994939000  | -4.754977000 | 0.419856000  |
| C                                                    | -1.949919000 | 2.915822000  | -2.269803000 | C  | 3.070593000  | 2.353220000  | 0.642143000  |
| C                                                    | -0.958063000 | 2.256074000  | -1.463881000 | C  | 3.958884000  | 3.121244000  | 1.426612000  |
| C                                                    | 4.053817000  | -3.379034000 | -1.731569000 | C  | 4.280981000  | 4.405531000  | 1.048414000  |
| C                                                    | 1.767037000  | -2.565242000 | -1.598544000 | C  | 3.736594000  | 4.984234000  | -0.131357000 |
| H                                                    | 0.716700000  | -2.697490000 | -1.835041000 | C  | 2.877200000  | 4.274456000  | -0.926935000 |
| C                                                    | 2.718958000  | -3.522840000 | -2.024521000 | C  | 2.506922000  | 2.935498000  | -0.584944000 |
| H                                                    | 4.777078000  | -4.120717000 | -2.058330000 | C  | -2.639917000 | -1.768440000 | -2.103378000 |
| H                                                    | 2.377703000  | -4.385190000 | -2.589673000 | C  | -1.155178000 | 0.145609000  | -1.880484000 |
| H                                                    | -1.666901000 | 3.167875000  | -3.286714000 | H  | -0.974103000 | 1.203990000  | -2.039491000 |
| H                                                    | -3.939652000 | 3.670463000  | -2.402911000 | C  | -2.356057000 | -0.445296000 | -2.346900000 |
| H                                                    | -4.538742000 | 3.049698000  | -0.075414000 | H  | -3.584310000 | -2.197780000 | -2.423671000 |
| H                                                    | -2.890473000 | 1.914118000  | 1.397165000  | H  | -3.073915000 | 0.177527000  | -2.871277000 |
| C                                                    | 2.820109000  | 2.636584000  | -0.131410000 | H  | 2.444188000  | 4.694277000  | -1.828735000 |
| H                                                    | 2.417089000  | 2.472675000  | -1.138014000 | H  | 4.006438000  | 6.002470000  | -0.394894000 |
| C                                                    | 4.261227000  | 3.131724000  | -0.231482000 | H  | 4.956716000  | 4.992634000  | 1.663218000  |
| C                                                    | 1.894366000  | 3.625218000  | 0.579574000  | H  | 4.360259000  | 2.673932000  | 2.330069000  |
| H                                                    | 0.882849000  | 3.227365000  | 0.676338000  | C  | 3.144864000  | -2.170632000 | -1.445500000 |
| H                                                    | 2.267673000  | 3.884453000  | 1.575139000  | H  | 2.586438000  | -1.712794000 | -2.272033000 |
| H                                                    | 1.840941000  | 4.545926000  | -0.008086000 | C  | 3.361013000  | -3.646295000 | -1.777380000 |
| H                                                    | 4.715976000  | 3.286506000  | 0.751789000  | C  | 4.441032000  | -1.384473000 | -1.244124000 |
| H                                                    | 4.264424000  | 4.096359000  | -0.748614000 | H  | 4.242513000  | -0.332872000 | -1.018021000 |
| H                                                    | 4.890356000  | 2.444238000  | -0.800861000 | H  | 5.043121000  | -1.800355000 | -0.430807000 |
| C                                                    | 2.461635000  | 1.031964000  | 2.449280000  | H  | 5.041986000  | -1.428451000 | -2.157114000 |
| H                                                    | 1.567560000  | 1.652929000  | 2.586421000  | H  | 3.933243000  | -4.166058000 | -1.006005000 |
| C                                                    | 3.660739000  | 1.677847000  | 3.142991000  | H  | 3.923874000  | -3.722153000 | -2.713121000 |
| C                                                    | 2.174201000  | -0.373814000 | 2.982126000  | H  | 2.411120000  | -4.169110000 | -1.914024000 |
| H                                                    | 1.251902000  | -0.789548000 | 2.568630000  | C  | 2.800923000  | -2.165703000 | 1.598302000  |
| H                                                    | 2.998735000  | -1.056973000 | 2.753809000  | H  | 3.497874000  | -1.319801000 | 1.669620000  |
| H                                                    | 2.066781000  | -0.327522000 | 4.070235000  | C  | 3.582342000  | -3.477934000 | 1.683058000  |
| H                                                    | 4.556463000  | 1.060215000  | 3.030667000  | C  | 1.762918000  | -2.035370000 | 2.713198000  |
| H                                                    | 3.452768000  | 1.760607000  | 4.214190000  | H  | 1.225120000  | -1.088143000 | 2.664659000  |
| H                                                    | 3.878004000  | 2.681423000  | 2.769173000  | H  | 1.018248000  | -2.833766000 | 2.656310000  |
| O                                                    | -0.744691000 | -1.613314000 | 1.501946000  | H  | 2.273605000  | -2.106480000 | 3.678411000  |
| O                                                    | -0.778451000 | -1.033691000 | -1.175176000 | H  | 2.936770000  | -4.347749000 | 1.533009000  |
| C                                                    | -1.829005000 | -1.342760000 | 0.953838000  | H  | 4.011983000  | -3.562258000 | 2.686185000  |
| C                                                    | -3.079514000 | -1.254805000 | 1.678945000  | H  | 4.404580000  | -3.528291000 | 0.966953000  |
| C                                                    | -4.266744000 | -0.986685000 | 1.034787000  | O  | -0.794255000 | -0.551185000 | 1.838980000  |
| C                                                    | -4.290805000 | -0.795362000 | -0.382594000 | O  | -0.271865000 | 1.853867000  | 0.623815000  |
| C                                                    | -3.119321000 | -0.855814000 | -1.127760000 | C  | -1.727392000 | 0.098885000  | 1.335922000  |
| C                                                    | -1.874932000 | -1.074484000 | -0.497840000 | C  | -3.071430000 | -0.423657000 | 1.233550000  |
| Cl                                                   | -3.117036000 | -0.574915000 | -2.829252000 | C  | -4.093976000 | 0.314386000  | 0.682020000  |
| Cl                                                   | -5.781084000 | -0.429618000 | -1.158057000 | C  | -3.847418000 | 1.639301000  | 0.200225000  |
| Cl                                                   | -5.739216000 | -0.865380000 | 1.927956000  | C  | -2.572547000 | 2.180852000  | 0.240970000  |
| Cl                                                   | -2.997621000 | -1.487648000 | 3.381158000  | C  | -1.463683000 | 1.432144000  | 0.734502000  |
| Σ of electronic & zero-point Energies -3699.281848   |              |              |              | Cl | -2.233078000 | 3.737562000  | -0.427333000 |
| Σ of electronic & thermal Free Energies -3699.356081 |              |              |              | Cl | -5.150179000 | 2.541139000  | -0.482201000 |
|                                                      |              |              |              | Cl | -5.679372000 | -0.357232000 | 0.537246000  |
|                                                      |              |              |              | Cl | -3.312938000 | -2.033188000 | 1.802726000  |

### TS1<sup>T</sup>

|    |             |              |              |
|----|-------------|--------------|--------------|
| Au | 1.233980000 | 0.260502000  | -0.147587000 |
| P  | 1.997700000 | -1.865408000 | -0.027839000 |
| O  | 2.767117000 | 1.135878000  | 0.982090000  |

Σ of electronic & zero-point Energies -3699.266488

Σ of electronic & thermal Free Energies -3699.339485

**TS2<sup>T</sup>**

|    |              |              |              |
|----|--------------|--------------|--------------|
| Au | -0.693545000 | 0.082246000  | -0.442940000 |
| P  | -2.452312000 | 1.248271000  | 0.355288000  |
| O  | 0.698159000  | 0.400965000  | 1.498312000  |
| O  | -1.389833000 | -1.344802000 | 2.026663000  |
| C  | -2.107560000 | -1.191900000 | -1.101186000 |
| C  | -3.846889000 | 0.155379000  | 0.015656000  |
| C  | -3.464668000 | -0.981989000 | -0.740223000 |
| C  | -4.453604000 | -1.927747000 | -1.139452000 |
| C  | -5.797281000 | -1.685334000 | -0.760961000 |
| H  | -6.558466000 | -2.402703000 | -1.055574000 |
| C  | -6.145355000 | -0.571088000 | -0.030969000 |
| H  | -7.180744000 | -0.407012000 | 0.250173000  |
| C  | -5.165936000 | 0.365208000  | 0.364116000  |
| H  | -5.459090000 | 1.232934000  | 0.944212000  |
| C  | 0.918425000  | -0.740967000 | 2.043159000  |
| C  | 2.235345000  | -1.141972000 | 2.395097000  |
| C  | 2.480002000  | -2.388091000 | 2.924230000  |
| C  | 1.418401000  | -3.307402000 | 3.146322000  |
| C  | 0.125305000  | -2.968090000 | 2.846662000  |
| C  | -0.203816000 | -1.681682000 | 2.296531000  |
| C  | -4.046834000 | -3.062251000 | -1.884358000 |
| C  | -1.736551000 | -2.299971000 | -1.821492000 |
| H  | -0.695835000 | -2.466995000 | -2.078066000 |
| C  | -2.723844000 | -3.239186000 | -2.211053000 |
| H  | -4.794107000 | -3.789593000 | -2.188032000 |
| H  | -2.416051000 | -4.113605000 | -2.776702000 |
| H  | -0.699559000 | -3.655192000 | 3.010814000  |
| H  | 1.643386000  | -4.287268000 | 3.558238000  |
| H  | 3.497676000  | -2.681890000 | 3.165141000  |
| H  | 3.038469000  | -0.434552000 | 2.210826000  |
| C  | -2.187002000 | 1.635935000  | 2.129998000  |
| H  | -1.684588000 | 0.712437000  | 2.447017000  |
| C  | -3.472669000 | 1.803874000  | 2.936104000  |
| C  | -1.214502000 | 2.808378000  | 2.258468000  |
| H  | -0.923648000 | 2.904509000  | 3.308626000  |
| H  | -0.300611000 | 2.632598000  | 1.686087000  |
| H  | -1.665695000 | 3.757350000  | 1.950619000  |
| H  | -4.070482000 | 2.662429000  | 2.614864000  |
| H  | -3.201418000 | 1.968442000  | 3.983662000  |
| H  | -4.091173000 | 0.904925000  | 2.893279000  |
| C  | -2.637854000 | 2.776540000  | -0.660149000 |
| H  | -1.700417000 | 3.319530000  | -0.487557000 |
| C  | -3.822276000 | 3.632301000  | -0.210407000 |
| C  | -2.733006000 | 2.404883000  | -2.140137000 |
| H  | -3.614913000 | 1.786780000  | -2.335290000 |
| H  | -2.817269000 | 3.316713000  | -2.739097000 |
| H  | -1.848888000 | 1.856863000  | -2.474671000 |
| H  | -4.766886000 | 3.098445000  | -0.350747000 |
| H  | -3.863548000 | 4.539749000  | -0.820854000 |
| H  | -3.745258000 | 3.939166000  | 0.834962000  |
| O  | 0.953008000  | 1.692457000  | -0.858145000 |
| O  | 0.951514000  | -1.017081000 | -1.117483000 |
| C  | 2.050453000  | 1.069093000  | -0.780453000 |
| C  | 3.301387000  | 1.735164000  | -0.565944000 |
| C  | 4.480808000  | 1.021406000  | -0.501044000 |
| C  | 4.476981000  | -0.403425000 | -0.650422000 |
| C  | 3.291280000  | -1.090631000 | -0.865643000 |
| C  | 2.063857000  | -0.391278000 | -0.932351000 |
| Cl | 3.243763000  | -2.804853000 | -1.013016000 |
| Cl | 5.957901000  | -1.267088000 | -0.528942000 |
| Cl | 5.973713000  | 1.835402000  | -0.227132000 |
| Cl | 3.253770000  | 3.443669000  | -0.374696000 |

Σ of electronic &amp; zero-point Energies -3699.259886

Σ of electronic &amp; thermal Free Energies -3699.332710

**RC2<sup>T</sup>**

|    |              |              |              |
|----|--------------|--------------|--------------|
| Au | 0.845912000  | 0.398083000  | -0.450094000 |
| P  | 2.539179000  | -1.117342000 | -0.412152000 |
| O  | -0.480558000 | -2.927966000 | 2.281336000  |
| O  | 0.397753000  | -0.301120000 | 2.049241000  |
| C  | 2.281448000  | 1.712431000  | 0.024096000  |
| C  | 3.908525000  | -0.132174000 | 0.233103000  |
| C  | 3.589007000  | 1.247566000  | 0.333014000  |
| C  | 4.591644000  | 2.172390000  | 0.747930000  |
| C  | 5.879035000  | 1.668066000  | 1.057777000  |
| H  | 6.647111000  | 2.364838000  | 1.382364000  |
| C  | 6.163327000  | 0.324764000  | 0.958500000  |
| H  | 7.154949000  | -0.041000000 | 1.205170000  |
| C  | 5.174834000  | -0.590590000 | 0.537452000  |
| H  | 5.418117000  | -1.644549000 | 0.465431000  |
| C  | -1.297848000 | -1.979125000 | 2.298030000  |
| C  | -2.715561000 | -2.203171000 | 2.424516000  |
| C  | -3.632863000 | -1.160972000 | 2.461591000  |
| C  | -3.188794000 | 0.162957000  | 2.386794000  |
| C  | -1.827459000 | 0.454564000  | 2.232883000  |
| C  | -0.836274000 | -0.564916000 | 2.196960000  |
| C  | 4.253300000  | 3.545367000  | 0.835165000  |
| C  | 1.983189000  | 3.051150000  | 0.117173000  |
| H  | 0.981237000  | 3.404113000  | -0.104627000 |
| C  | 2.982680000  | 3.968008000  | 0.525436000  |
| H  | 5.011126000  | 4.255838000  | 1.152609000  |
| H  | 2.728459000  | 5.021278000  | 0.597765000  |
| H  | -1.485737000 | 1.483256000  | 2.169675000  |
| H  | -3.906407000 | 0.976973000  | 2.424312000  |
| H  | -4.694043000 | -1.371964000 | 2.549923000  |
| H  | -3.036209000 | -3.238194000 | 2.494592000  |
| C  | 2.055470000  | -2.558100000 | 0.611520000  |
| H  | 1.406431000  | -2.098408000 | 1.373876000  |
| C  | 3.215787000  | -3.253127000 | 1.319236000  |
| C  | 1.187673000  | -3.508091000 | -0.215850000 |
| H  | 0.366368000  | -2.979431000 | -0.706295000 |
| H  | 1.768355000  | -4.058476000 | -0.964143000 |
| H  | 0.731487000  | -4.221589000 | 0.473326000  |
| H  | 3.914988000  | -3.734627000 | 0.627638000  |
| H  | 2.791226000  | -4.031771000 | 1.959582000  |
| H  | 3.769778000  | -2.565106000 | 1.961853000  |
| C  | 2.956537000  | -1.604197000 | -2.141679000 |
| H  | 2.046985000  | -2.103073000 | -2.498279000 |
| C  | 4.130088000  | -2.583121000 | -2.191710000 |
| C  | 3.218297000  | -0.359489000 | -2.988949000 |
| H  | 2.355485000  | 0.311623000  | -3.000888000 |
| H  | 4.078317000  | 0.200581000  | -2.608867000 |
| H  | 3.435596000  | -0.657346000 | -4.019201000 |
| H  | 5.048404000  | -2.110151000 | -1.831579000 |
| H  | 4.301519000  | -2.888946000 | -3.228451000 |
| H  | 3.946930000  | -3.485352000 | -1.604267000 |
| O  | -0.719387000 | -0.900242000 | -0.928605000 |
| O  | -0.734999000 | 1.755313000  | -0.511601000 |
| C  | -1.864974000 | -0.300306000 | -0.788287000 |
| C  | -3.087798000 | -0.994712000 | -0.863659000 |
| C  | -4.293252000 | -0.309692000 | -0.746059000 |
| C  | -4.306127000 | 1.096265000  | -0.546304000 |
| C  | -3.112727000 | 1.799831000  | -0.445535000 |
| C  | -1.871753000 | 1.125640000  | -0.564240000 |

|    |              |              |              |
|----|--------------|--------------|--------------|
| Cl | -3.071863000 | 3.495513000  | -0.144877000 |
| Cl | -5.808139000 | 1.919670000  | -0.356305000 |
| Cl | -5.780082000 | -1.174479000 | -0.813643000 |
| Cl | -3.022868000 | -2.702359000 | -1.068011000 |

Σ of electronic & zero-point Energies -3699.266285  
 Σ of electronic & thermal Free Energies -3699.338381

**(P,C)Au(O,O)-H<sub>4</sub>T**

|    |              |              |              |
|----|--------------|--------------|--------------|
| Au | 0.607755000  | 0.333962000  | -0.033479000 |
| P  | -1.188893000 | -1.285763000 | -0.015251000 |
| O  | 2.280775000  | -1.066634000 | -0.012064000 |
| O  | 2.567917000  | 1.657738000  | -0.002862000 |
| C  | -0.894035000 | 1.711458000  | -0.082815000 |
| C  | -2.588064000 | -0.129066000 | -0.091466000 |
| C  | -2.250682000 | 1.262791000  | -0.102423000 |
| C  | -3.314460000 | 2.220659000  | -0.131777000 |
| C  | -4.655526000 | 1.764964000  | -0.147840000 |
| H  | -5.454461000 | 2.502012000  | -0.170205000 |
| C  | -4.951322000 | 0.422808000  | -0.135817000 |
| H  | -5.984104000 | 0.088069000  | -0.148951000 |
| C  | -3.912122000 | -0.529870000 | -0.107349000 |
| H  | -4.166008000 | -1.583709000 | -0.103829000 |
| C  | 3.457393000  | -0.547004000 | -0.002776000 |
| C  | 4.625977000  | -1.352504000 | 0.002008000  |
| C  | 5.871818000  | -0.771811000 | 0.016540000  |
| C  | 6.021914000  | 0.643074000  | 0.026801000  |
| C  | 4.925774000  | 1.466298000  | 0.021897000  |
| C  | 3.605105000  | 0.919791000  | 0.005585000  |
| C  | -2.997877000 | 3.601699000  | -0.141895000 |
| C  | -0.636361000 | 3.067778000  | -0.093583000 |
| H  | 0.392491000  | 3.415986000  | -0.079004000 |
| C  | -1.687737000 | 4.013624000  | -0.123032000 |
| H  | -3.809063000 | 4.324571000  | -0.164007000 |
| H  | -1.451154000 | 5.074251000  | -0.130431000 |
| H  | 5.019151000  | 2.547540000  | 0.028968000  |
| H  | 7.020802000  | 1.069502000  | 0.038224000  |
| H  | 6.759102000  | -1.398364000 | 0.020802000  |
| H  | 4.498384000  | -2.430466000 | -0.005032000 |
| C  | -1.181005000 | -2.385055000 | -1.507874000 |
| H  | -0.814476000 | -1.696903000 | -2.281691000 |
| C  | -2.519653000 | -2.949394000 | -1.976635000 |
| C  | -0.116666000 | -3.465524000 | -1.296049000 |
| H  | 0.835680000  | -3.032935000 | -0.973466000 |
| H  | -0.438032000 | -4.196614000 | -0.546757000 |
| H  | 0.051759000  | -4.007585000 | -2.231980000 |
| H  | -2.957715000 | -3.632734000 | -1.243930000 |
| H  | -2.370111000 | -3.514291000 | -2.903639000 |
| H  | -3.240346000 | -2.154992000 | -2.181782000 |
| C  | -1.334777000 | -2.270775000 | 1.548793000  |
| H  | -0.408138000 | -2.859059000 | 1.555881000  |
| C  | -2.528413000 | -3.216715000 | 1.658115000  |
| C  | -1.290182000 | -1.284536000 | 2.719145000  |
| H  | -0.398776000 | -0.652137000 | 2.679610000  |
| H  | -2.168077000 | -0.630831000 | 2.711148000  |
| H  | -1.282041000 | -1.832007000 | 3.667089000  |
| H  | -3.470340000 | -2.661812000 | 1.666468000  |
| H  | -2.468563000 | -3.774201000 | 2.599790000  |
| H  | -2.559350000 | -3.944852000 | 0.844386000  |

Σ of electronic & zero-point Energies -1479.771734  
 Σ of electronic & thermal Free Energies -1479.831714

**(P,C)Au(O,O)-Cl<sub>4</sub>T**

|    |              |              |              |
|----|--------------|--------------|--------------|
| Au | -0.604241000 | 0.398926000  | -0.035067000 |
| P  | -2.347125000 | -1.274607000 | -0.006818000 |
| O  | 1.091048000  | -0.983970000 | -0.011674000 |
| O  | 1.423317000  | 1.713144000  | 0.000690000  |
| C  | -2.136454000 | 1.733007000  | -0.092037000 |
| C  | -3.775602000 | -0.158341000 | -0.098459000 |
| C  | -3.478128000 | 1.242275000  | -0.115177000 |
| C  | -4.568145000 | 2.169136000  | -0.153386000 |
| C  | -5.895444000 | 1.674790000  | -0.173088000 |
| H  | -6.714953000 | 2.388412000  | -0.202471000 |
| C  | -6.152893000 | 0.324778000  | -0.155445000 |
| H  | -7.175490000 | -0.039358000 | -0.171110000 |
| C  | -5.087260000 | -0.597682000 | -0.117243000 |
| H  | -5.310441000 | -1.658446000 | -0.107781000 |
| C  | 2.267462000  | -0.492977000 | -0.009009000 |
| C  | 3.422572000  | -1.322810000 | -0.015427000 |
| C  | 4.692704000  | -0.773159000 | -0.005778000 |
| C  | 4.871535000  | 0.649417000  | 0.009923000  |
| C  | 3.778880000  | 1.491698000  | 0.013730000  |
| C  | 2.440490000  | 0.969243000  | 0.002143000  |
| C  | -4.291169000 | 3.558759000  | -0.168073000 |
| C  | -1.915456000 | 3.095246000  | -0.106706000 |
| H  | -0.897992000 | 3.475282000  | -0.089179000 |
| C  | -2.994207000 | 4.009680000  | -0.144787000 |
| H  | -5.122722000 | 4.257641000  | -0.197096000 |
| H  | -2.788184000 | 5.076358000  | -0.155595000 |
| C  | -2.285637000 | -2.393630000 | -1.481758000 |
| H  | -1.934150000 | -1.707095000 | -2.263848000 |
| C  | -3.605100000 | -3.003490000 | -1.949047000 |
| C  | -1.192641000 | -3.439822000 | -1.243072000 |
| H  | -0.253268000 | -2.980501000 | -0.920247000 |
| H  | -1.500549000 | -4.168861000 | -0.486452000 |
| H  | -1.002067000 | -3.990067000 | -2.169664000 |
| H  | -4.029065000 | -3.685493000 | -1.206933000 |
| H  | -3.431178000 | -3.580969000 | -2.863663000 |
| H  | -4.346286000 | -2.234059000 | -2.175471000 |
| C  | -2.447313000 | -2.234352000 | 1.574117000  |
| H  | -1.499828000 | -2.788185000 | 1.587634000  |
| C  | -3.606944000 | -3.220772000 | 1.694719000  |
| C  | -2.439979000 | -1.229681000 | 2.729327000  |
| H  | -1.572012000 | -0.565970000 | 2.682469000  |
| H  | -3.341126000 | -0.608726000 | 2.712389000  |
| H  | -2.412338000 | -1.763413000 | 3.684472000  |
| H  | -4.568399000 | -2.700265000 | 1.689761000  |
| H  | -3.530390000 | -3.758573000 | 2.646259000  |
| H  | -3.607338000 | -3.964127000 | 0.894331000  |
| Cl | 3.948073000  | 3.204264000  | 0.030628000  |
| Cl | 6.468513000  | 1.296196000  | 0.022978000  |
| Cl | 6.076576000  | -1.795900000 | -0.012288000 |
| Cl | 3.169022000  | -3.030494000 | -0.035448000 |

Σ of electronic & zero-point Energies -3317.982074  
 Σ of electronic & thermal Free Energies -3318.050150

**Optimization GAS PHASE, Singlet state, Au(I)  
forms**

**(P,C)Au(O,O)Cl<sub>4</sub> – Au(I)**

|    |              |              |              |
|----|--------------|--------------|--------------|
| Au | 0.484137000  | -0.890643000 | -0.404624000 |
| P  | 0.968545000  | 1.302512000  | 0.046451000  |
| O  | -1.805343000 | -1.318982000 | -2.769843000 |
| O  | -0.599240000 | -2.656618000 | -0.641025000 |
| C  | 2.535950000  | -1.157595000 | -0.409986000 |
| C  | 2.764981000  | 1.224161000  | 0.272638000  |
| C  | 3.341733000  | -0.049340000 | -0.018346000 |
| C  | 4.758615000  | -0.203209000 | 0.091635000  |
| C  | 5.535872000  | 0.905708000  | 0.506806000  |
| H  | 6.612212000  | 0.782964000  | 0.595194000  |
| C  | 4.952651000  | 2.117924000  | 0.795122000  |
| H  | 5.563593000  | 2.957007000  | 1.112662000  |
| C  | 3.557721000  | 2.284061000  | 0.671271000  |
| H  | 3.120807000  | 3.254242000  | 0.878744000  |
| C  | -2.138985000 | -1.058779000 | -1.621283000 |
| C  | -3.120317000 | -0.014920000 | -1.284287000 |
| C  | -3.532631000 | 0.220004000  | 0.002639000  |
| C  | -3.028229000 | -0.551062000 | 1.111060000  |
| C  | -2.085236000 | -1.519085000 | 0.885860000  |
| C  | -1.516166000 | -1.733919000 | -0.438994000 |
| C  | 5.333630000  | -1.461882000 | -0.213688000 |
| C  | 3.134354000  | -2.363733000 | -0.698340000 |
| H  | 2.527957000  | -3.214353000 | -0.995150000 |
| C  | 4.539650000  | -2.513025000 | -0.603636000 |
| H  | 6.410584000  | -1.580232000 | -0.132568000 |
| H  | 4.987463000  | -3.474779000 | -0.837096000 |
| C  | 0.550384000  | 2.447999000  | -1.349814000 |
| H  | 0.723637000  | 1.813172000  | -2.228100000 |
| C  | 1.445375000  | 3.680277000  | -1.465074000 |
| C  | -0.935743000 | 2.800162000  | -1.296564000 |
| H  | -1.559209000 | 1.913451000  | -1.167346000 |
| H  | -1.155998000 | 3.496530000  | -0.482394000 |
| H  | -1.234994000 | 3.276497000  | -2.233706000 |
| H  | 1.340708000  | 4.346089000  | -0.603562000 |
| H  | 1.152900000  | 4.247281000  | -2.354594000 |
| H  | 2.498260000  | 3.410536000  | -1.567417000 |
| C  | 0.140312000  | 1.829511000  | 1.610092000  |
| H  | -0.926940000 | 1.735664000  | 1.368174000  |
| C  | 0.435305000  | 3.262049000  | 2.050917000  |
| C  | 0.481535000  | 0.820983000  | 2.708439000  |
| H  | 0.212622000  | -0.199628000 | 2.426033000  |
| H  | 1.551210000  | 0.841540000  | 2.939061000  |
| H  | -0.071584000 | 1.071080000  | 3.618295000  |
| H  | 1.483155000  | 3.374539000  | 2.342086000  |
| H  | -0.175211000 | 3.500599000  | 2.927559000  |
| H  | 0.205800000  | 3.998952000  | 1.278348000  |
| Cl | -1.471388000 | -2.502385000 | 2.159535000  |
| Cl | -3.593764000 | -0.219149000 | 2.711102000  |
| Cl | -4.671385000 | 1.477058000  | 0.330434000  |
| Cl | -3.775810000 | 0.849124000  | -2.622690000 |

Σ of electronic & zero-point Energies -3317.986930  
Σ of electronic & thermal Free Energies -3317.051038

**(P,C)Au(O,O)H<sub>4</sub> – Au(I)**

|    |              |              |              |
|----|--------------|--------------|--------------|
| Au | -0.496413000 | -0.874325000 | 0.003198000  |
| P  | 0.370028000  | 1.244330000  | -0.092315000 |
| O  | -2.961742000 | -1.211753000 | -2.114443000 |

|   |              |              |              |
|---|--------------|--------------|--------------|
| O | -1.856181000 | -2.429110000 | 0.193494000  |
| C | 1.484142000  | -1.494966000 | -0.098865000 |
| C | 2.148300000  | 0.901620000  | 0.027175000  |
| C | 2.489389000  | -0.485797000 | -0.017665000 |
| C | 3.871515000  | -0.851810000 | 0.019180000  |
| C | 4.848689000  | 0.167951000  | 0.125485000  |
| H | 5.897094000  | -0.117390000 | 0.160071000  |
| C | 4.491159000  | 1.494976000  | 0.182960000  |
| H | 5.252889000  | 2.264198000  | 0.263869000  |
| C | 3.132333000  | 1.867715000  | 0.124878000  |
| H | 2.873399000  | 2.920185000  | 0.141109000  |
| C | -3.186370000 | -0.746730000 | -0.995867000 |
| C | -4.006071000 | 0.447093000  | -0.780073000 |
| C | -4.322174000 | 0.900763000  | 0.464804000  |
| C | -3.837008000 | 0.263184000  | 1.652765000  |
| C | -3.020291000 | -0.821463000 | 1.551613000  |
| C | -2.600518000 | -1.335109000 | 0.260049000  |
| C | 4.215721000  | -2.224661000 | -0.048244000 |
| C | 1.866793000  | -2.817310000 | -0.166067000 |
| H | 1.111793000  | -3.595541000 | -0.230604000 |
| C | 3.234928000  | -3.181870000 | -0.144782000 |
| H | 5.265392000  | -2.504463000 | -0.022384000 |
| H | 3.505857000  | -4.232708000 | -0.199219000 |
| H | -2.649610000 | -1.349438000 | 2.426546000  |
| H | -4.133686000 | 0.643340000  | 2.625294000  |
| H | -4.974119000 | 1.765372000  | 0.568546000  |
| H | -4.416402000 | 0.911047000  | -1.672627000 |
| C | 0.012541000  | 2.105764000  | -1.696267000 |
| H | -0.009999000 | 1.265772000  | -2.402374000 |
| C | 1.082600000  | 3.092418000  | -2.159145000 |
| C | -1.381541000 | 2.730924000  | -1.652878000 |
| H | -2.135312000 | 2.027546000  | -1.289173000 |
| H | -1.401250000 | 3.619103000  | -1.013540000 |
| H | -1.672535000 | 3.041741000  | -2.660622000 |
| H | 1.171880000  | 3.947990000  | -1.483138000 |
| H | 0.805513000  | 3.481071000  | -3.144528000 |
| H | 2.062369000  | 2.618832000  | -2.245797000 |
| C | -0.185884000 | 2.263788000  | 1.343848000  |
| H | -1.272330000 | 2.322509000  | 1.191711000  |
| C | 0.395340000  | 3.674134000  | 1.420343000  |
| C | 0.078938000  | 1.474219000  | 2.627242000  |
| H | -0.424341000 | 0.503890000  | 2.610398000  |
| H | 1.150689000  | 1.302979000  | 2.768809000  |
| H | -0.293251000 | 2.036523000  | 3.489345000  |
| H | 1.468598000  | 3.644863000  | 1.626322000  |
| H | -0.080043000 | 4.218680000  | 2.242934000  |
| H | 0.231762000  | 4.248520000  | 0.505785000  |

Σ of electronic & zero-point Energies -1479.770986  
Σ of electronic & thermal Free Energies -1479.827742

**(P,C)Au(O,O)H<sub>4</sub> – Au(II) – Singlet Open-Shell**

|    |              |              |              |
|----|--------------|--------------|--------------|
| Au | 0.083314000  | -1.335846000 | -0.294280000 |
| P  | 0.149494000  | 1.056286000  | -0.296008000 |
| O  | -1.892667000 | -1.779886000 | -0.133533000 |
| O  | -3.280199000 | -0.168669000 | -1.830517000 |
| C  | 2.116326000  | -1.229944000 | -0.176212000 |
| C  | 1.818985000  | 1.186904000  | 0.401431000  |
| C  | 2.645123000  | 0.023278000  | 0.277083000  |
| C  | 4.025995000  | 0.138716000  | 0.632719000  |
| C  | 4.504949000  | 1.361858000  | 1.163761000  |
| H  | 5.552773000  | 1.430704000  | 1.444986000  |
| C  | 3.671479000  | 2.442767000  | 1.330239000  |
| H  | 4.051282000  | 3.369761000  | 1.748593000  |
| C  | 2.322456000  | 2.361218000  | 0.928957000  |
| H  | 1.689347000  | 3.238052000  | 1.016391000  |
| C  | -2.912519000 | -1.135474000 | 0.305644000  |
| C  | -3.308980000 | -1.191808000 | 1.668158000  |
| C  | -4.391295000 | -0.471384000 | 2.111341000  |

|                                                      |              |              |              |
|------------------------------------------------------|--------------|--------------|--------------|
| C                                                    | -5.115483000 | 0.373588000  | 1.219368000  |
| C                                                    | -4.765306000 | 0.483473000  | -0.097566000 |
| C                                                    | -3.654451000 | -0.269178000 | -0.648515000 |
| C                                                    | 4.875466000  | -0.981413000 | 0.456334000  |
| C                                                    | 2.995123000  | -2.285134000 | -0.339436000 |
| H                                                    | 2.626420000  | -3.245327000 | -0.688749000 |
| C                                                    | 4.371524000  | -2.159947000 | -0.036486000 |
| H                                                    | 5.925929000  | -0.890514000 | 0.719051000  |
| H                                                    | 5.027380000  | -3.015113000 | -0.175557000 |
| C                                                    | 0.218425000  | 1.866418000  | -1.963710000 |
| H                                                    | 0.829919000  | 1.144994000  | -2.522664000 |
| C                                                    | 0.944441000  | 3.213499000  | -1.966973000 |
| C                                                    | -1.159114000 | 1.945144000  | -2.615242000 |
| H                                                    | -1.696877000 | 0.994906000  | -2.579564000 |
| H                                                    | -1.788524000 | 2.695821000  | -2.127938000 |
| H                                                    | -1.043036000 | 2.246424000  | -3.661146000 |
| H                                                    | 0.406633000  | 3.965351000  | -1.382605000 |
| H                                                    | 1.004323000  | 3.579199000  | -2.997564000 |
| H                                                    | 1.960615000  | 3.133849000  | -1.576294000 |
| C                                                    | -1.122777000 | 1.749227000  | 0.830966000  |
| H                                                    | -2.049847000 | 1.271364000  | 0.469865000  |
| C                                                    | -1.333996000 | 3.262419000  | 0.804071000  |
| C                                                    | -0.853047000 | 1.224478000  | 2.243223000  |
| H                                                    | -0.705748000 | 0.140587000  | 2.248606000  |
| H                                                    | 0.038190000  | 1.689608000  | 2.673619000  |
| H                                                    | -1.711617000 | 1.445601000  | 2.882929000  |
| H                                                    | -0.459670000 | 3.798269000  | 1.184752000  |
| H                                                    | -2.183880000 | 3.515896000  | 1.446489000  |
| H                                                    | -1.556442000 | 3.632578000  | -0.198048000 |
| H                                                    | -5.313962000 | 1.119703000  | -0.785413000 |
| H                                                    | -5.962605000 | 0.936384000  | 1.602997000  |
| H                                                    | -4.702377000 | -0.539598000 | 3.149530000  |
| H                                                    | -2.739472000 | -1.834756000 | 2.333478000  |
| Σ of electronic & zero-point Energies -1479.745310   |              |              |              |
| Σ of electronic & thermal Free Energies -1479.801071 |              |              |              |

### **P,C)Au(O,O)H<sub>4</sub> – Au(II) – minimum – Triplet**

|   |              |              |              |
|---|--------------|--------------|--------------|
| P | -0.164924000 | 1.104472000  | 0.260199000  |
| O | 1.997873000  | -1.425073000 | 0.832842000  |
| O | 4.219528000  | -0.026138000 | 1.605492000  |
| C | -2.018566000 | -1.266204000 | 0.048216000  |
| C | -1.920220000 | 1.225841000  | -0.170101000 |
| C | -2.647115000 | -0.004955000 | -0.209144000 |
| C | -4.043251000 | 0.045326000  | -0.519223000 |
| C | -4.646106000 | 1.297249000  | -0.795462000 |
| H | -5.706174000 | 1.320460000  | -1.034518000 |
| C | -3.917502000 | 2.462442000  | -0.766816000 |
| H | -4.393709000 | 3.413653000  | -0.983079000 |
| C | -2.545088000 | 2.427924000  | -0.447098000 |
| H | -1.986580000 | 3.356944000  | -0.412349000 |
| C | 2.826259000  | -0.985020000 | -0.072622000 |
| C | 2.628954000  | -1.163070000 | -1.457656000 |
| C | 3.508301000  | -0.631285000 | -2.386240000 |
| C | 4.643513000  | 0.106928000  | -1.971214000 |
| C | 4.893144000  | 0.291837000  | -0.635711000 |
| C | 4.016952000  | -0.233275000 | 0.389170000  |
| C | -4.788019000 | -1.159400000 | -0.548453000 |
| C | -2.792505000 | -2.410423000 | 0.009570000  |
| H | -2.337226000 | -3.377043000 | 0.204676000  |
| C | -4.174944000 | -2.358928000 | -0.285434000 |
| H | -5.848026000 | -1.115113000 | -0.782773000 |
| H | -4.748723000 | -3.281081000 | -0.307132000 |
| C | 0.129035000  | 1.823025000  | 1.936692000  |
| H | -0.371137000 | 1.089232000  | 2.583365000  |
| C | -0.514412000 | 3.187349000  | 2.180913000  |
| C | 1.627859000  | 1.787526000  | 2.239945000  |
| H | 2.060125000  | 0.789623000  | 2.123135000  |
| H | 2.187302000  | 2.473259000  | 1.596561000  |
| H | 1.794608000  | 2.103915000  | 3.274163000  |

|   |              |              |              |
|---|--------------|--------------|--------------|
| H | -0.079394000 | 3.965681000  | 1.548932000  |
| H | -0.344798000 | 3.477435000  | 3.223226000  |
| H | -1.593223000 | 3.163830000  | 2.010010000  |
| C | 0.878148000  | 1.877033000  | -1.056546000 |
| H | 1.874731000  | 1.464980000  | -0.853540000 |
| C | 0.960082000  | 3.402716000  | -1.044089000 |
| C | 0.404802000  | 1.341659000  | -2.408392000 |
| H | 0.344416000  | 0.250643000  | -2.410254000 |
| H | -0.580347000 | 1.741481000  | -2.665889000 |
| H | 1.116075000  | 1.637911000  | -3.184792000 |
| H | -0.014352000 | 3.863286000  | -1.229534000 |
| H | 1.633500000  | 3.727361000  | -1.844644000 |
| H | 1.356957000  | 3.789549000  | -0.103706000 |
| H | 5.758448000  | 0.846977000  | -0.285900000 |
| H | 5.317121000  | 0.517026000  | -2.718511000 |
| H | 3.327228000  | -0.787302000 | -3.445998000 |
| H | 1.764211000  | -1.740248000 | -1.779559000 |

Σ of electronic & zero-point Energies -1479.754197

Σ of electronic & thermal Free Energies -1479.812446

### **Optimization GAS PHASE, Singlet state, (P,C)Au(O,O)H<sub>4</sub> + o-quinone**

- Approach *trans* to P

#### **RC1-H**

|    |              |              |              |
|----|--------------|--------------|--------------|
| Au | 0.119526000  | -0.414094000 | -0.490386000 |
| P  | 1.663698000  | 1.227397000  | -0.223706000 |
| O  | -1.425716000 | 0.737892000  | -1.211469000 |
| O  | -1.252204000 | -1.912222000 | -0.760324000 |
| C  | 1.628453000  | -1.628339000 | 0.042503000  |
| C  | 3.197453000  | 0.277884000  | -0.072360000 |
| C  | 2.952527000  | -1.109978000 | 0.120137000  |
| C  | 4.044779000  | -1.979051000 | 0.415743000  |
| C  | 5.347545000  | -1.424564000 | 0.469964000  |
| H  | 6.185537000  | -2.083174000 | 0.682647000  |
| C  | 5.561293000  | -0.080391000 | 0.264104000  |
| H  | 6.567423000  | 0.324304000  | 0.311771000  |
| C  | 4.478842000  | 0.787496000  | 0.004105000  |
| H  | 4.666325000  | 1.846940000  | -0.128448000 |
| C  | -2.543873000 | 0.024577000  | -1.213663000 |
| C  | -3.797250000 | 0.596533000  | -1.464376000 |
| C  | -4.927884000 | -0.206539000 | -1.513876000 |
| C  | -4.820678000 | -1.599821000 | -1.367723000 |
| C  | -3.591817000 | -2.196464000 | -1.131964000 |
| C  | -2.443512000 | -1.397824000 | -1.016691000 |
| C  | 3.776626000  | -3.351031000 | 0.644061000  |
| C  | 1.402913000  | -2.963395000 | 0.286289000  |
| H  | 0.391148000  | -3.352737000 | 0.236292000  |
| C  | 2.486406000  | -3.823087000 | 0.587721000  |
| H  | 4.603022000  | -4.019408000 | 0.869015000  |
| H  | 2.286783000  | -4.874799000 | 0.771967000  |
| H  | -3.490315000 | -3.269555000 | -1.006937000 |
| H  | -5.711691000 | -2.217356000 | -1.434245000 |
| H  | -5.898555000 | 0.243755000  | -1.697106000 |
| H  | -3.854337000 | 1.671006000  | -1.600537000 |
| C  | 1.616173000  | 2.343120000  | -1.696070000 |
| H  | 1.359223000  | 1.649652000  | -2.506097000 |
| C  | 2.942226000  | 3.016554000  | -2.043943000 |
| C  | 0.456693000  | 3.330326000  | -1.527213000 |
| H  | -0.472912000 | 2.816573000  | -1.268006000 |
| H  | 0.677124000  | 4.074563000  | -0.756393000 |
| H  | 0.303627000  | 3.863145000  | -2.470836000 |



|   |              |              |              |   |              |              |              |
|---|--------------|--------------|--------------|---|--------------|--------------|--------------|
| H | 3.283256000  | 3.691840000  | -1.254565000 | H | 0.190201000  | -3.029798000 | -1.075570000 |
| H | 2.806262000  | 3.615396000  | -2.950248000 | H | -1.042836000 | -4.178301000 | -0.508819000 |
| H | 3.729359000  | 2.285258000  | -2.241282000 | H | -0.700537000 | -4.038846000 | -2.235422000 |
| C | 1.420763000  | 2.161892000  | 1.341229000  | H | -3.619996000 | -3.590370000 | -0.940161000 |
| H | 0.417734000  | 2.587604000  | 1.232766000  | H | -3.183999000 | -3.604791000 | -2.648823000 |
| C | 2.465506000  | 3.257781000  | 1.542639000  | H | -3.977247000 | -2.183039000 | -1.961223000 |
| C | 1.382166000  | 1.174446000  | 2.507775000  | C | -1.655872000 | -2.096397000 | 1.580520000  |
| H | 0.543151000  | 0.482896000  | 2.402393000  | H | -0.656974000 | -2.548947000 | 1.540616000  |
| H | 2.317517000  | 0.611543000  | 2.592221000  | C | -2.721368000 | -3.172572000 | 1.786642000  |
| H | 1.241766000  | 1.737180000  | 3.436147000  | C | -1.672664000 | -1.049345000 | 2.696124000  |
| H | 3.471636000  | 2.837874000  | 1.636688000  | H | -0.848887000 | -0.341693000 | 2.583222000  |
| H | 2.243582000  | 3.786678000  | 2.474859000  | H | -2.624703000 | -0.509619000 | 2.715005000  |
| H | 2.466921000  | 3.997364000  | 0.738301000  | H | -1.547754000 | -1.556028000 | 3.657766000  |
| O | -1.709984000 | 2.116940000  | 1.336227000  | H | -3.725212000 | -2.737282000 | 1.802200000  |
| O | -1.337043000 | -0.565478000 | 1.850708000  | H | -2.559152000 | -3.649822000 | 2.758173000  |
| C | -2.685717000 | 1.379256000  | 1.458603000  | H | -2.689924000 | -3.954622000 | 1.024947000  |
| C | -4.056653000 | 1.866667000  | 1.433915000  | O | 1.442412000  | -0.455895000 | 2.264567000  |
| C | -5.099481000 | 1.005388000  | 1.531132000  | O | 1.458540000  | 1.709662000  | 0.576723000  |
| C | -4.905807000 | -0.418734000 | 1.651707000  | C | 2.529053000  | 0.033264000  | 1.925451000  |
| C | -3.662623000 | -0.961100000 | 1.723180000  | C | 3.804988000  | -0.450860000 | 2.406718000  |
| C | -2.480497000 | -0.124322000 | 1.680683000  | C | 4.971123000  | 0.125472000  | 2.002914000  |
| H | -4.197258000 | 2.937082000  | 1.320687000  | C | 4.985623000  | 1.220030000  | 1.081114000  |
| H | -6.118001000 | 1.383743000  | 1.502281000  | C | 3.820661000  | 1.751582000  | 0.599019000  |
| H | -5.781657000 | -1.057839000 | 1.701485000  | C | 2.555020000  | 1.198219000  | 0.965957000  |
| H | -3.502569000 | -2.027759000 | 1.834435000  | H | 3.813910000  | 2.592673000  | -0.085325000 |

Σ of electronic & zero-point Energies -1861.081844

Σ of electronic & thermal Free Energies -1861.145106

#### TS1-H

|    |              |              |              |
|----|--------------|--------------|--------------|
| Au | -0.057459000 | 0.192529000  | -0.246568000 |
| P  | -1.795358000 | -1.225975000 | -0.036273000 |
| O  | 1.380500000  | -1.327081000 | -0.303264000 |
| O  | 1.435304000  | 0.850703000  | -1.927068000 |
| C  | -1.463138000 | 1.617083000  | -0.166516000 |
| C  | -3.218477000 | -0.112331000 | -0.011727000 |
| C  | -2.835941000 | 1.254030000  | -0.073347000 |
| C  | -3.841620000 | 2.265274000  | -0.031983000 |
| C  | -5.193962000 | 1.858684000  | 0.080678000  |
| H  | -5.966137000 | 2.622822000  | 0.112575000  |
| C  | -5.538801000 | 0.527280000  | 0.152091000  |
| H  | -6.581401000 | 0.239237000  | 0.242692000  |
| C  | -4.546198000 | -0.474710000 | 0.106535000  |
| H  | -4.837927000 | -1.517573000 | 0.162596000  |
| C  | 2.524179000  | -0.914328000 | -0.791616000 |
| C  | 3.726184000  | -1.600150000 | -0.533516000 |
| C  | 4.914861000  | -1.140247000 | -1.064958000 |
| C  | 4.934546000  | -0.032695000 | -1.947225000 |
| C  | 3.782093000  | 0.650783000  | -2.249415000 |
| C  | 2.535684000  | 0.253694000  | -1.682660000 |
| C  | -3.440588000 | 3.621932000  | -0.102511000 |
| C  | -1.106205000 | 2.943317000  | -0.227249000 |
| H  | -0.057303000 | 3.214213000  | -0.281293000 |
| C  | -2.107689000 | 3.944475000  | -0.199908000 |
| H  | -4.199501000 | 4.398744000  | -0.075918000 |
| H  | -1.805832000 | 4.986579000  | -0.251727000 |
| H  | 3.778520000  | 1.508324000  | -2.914427000 |
| H  | 5.879883000  | 0.283991000  | -2.378973000 |
| H  | 5.842121000  | -1.653111000 | -0.829318000 |
| H  | 3.692219000  | -2.457581000 | 0.129675000  |
| C  | -1.861093000 | -2.396769000 | -1.466956000 |
| H  | -1.573142000 | -1.745591000 | -2.301757000 |
| C  | -3.247171000 | -2.969718000 | -1.759393000 |
| C  | -0.783920000 | -3.471880000 | -1.303254000 |

Σ of electronic & zero-point Energies -1861.062003

Σ of electronic & thermal Free Energies -1861.122734

#### INT-H

|    |              |              |              |
|----|--------------|--------------|--------------|
| Au | 0.065432000  | -0.249553000 | -0.111878000 |
| P  | 1.735163000  | 1.233561000  | 0.135461000  |
| O  | -1.331365000 | 1.244216000  | 0.504283000  |
| O  | -1.445150000 | 0.713415000  | -2.153703000 |
| C  | 1.528737000  | -1.600026000 | -0.370396000 |
| C  | 3.200632000  | 0.180551000  | 0.049696000  |
| C  | 2.883009000  | -1.179605000 | -0.219705000 |
| C  | 3.942188000  | -2.129125000 | -0.339329000 |
| C  | 5.273471000  | -1.676893000 | -0.165231000 |
| H  | 6.082221000  | -2.397940000 | -0.250125000 |
| C  | 5.553056000  | -0.356459000 | 0.106561000  |
| H  | 6.580777000  | -0.032701000 | 0.237385000  |
| C  | 4.510527000  | 0.588160000  | 0.211189000  |
| H  | 4.749343000  | 1.627313000  | 0.409446000  |
| C  | -2.486447000 | 1.179563000  | -0.082946000 |
| C  | -3.684659000 | 1.491094000  | 0.596932000  |
| C  | -4.891907000 | 1.428927000  | -0.062915000 |
| C  | -4.947344000 | 1.155811000  | -1.459533000 |
| C  | -3.814416000 | 0.904369000  | -2.182843000 |
| C  | -2.522089000 | 0.906467000  | -1.550597000 |
| C  | 3.617034000  | -3.478316000 | -0.622299000 |
| C  | 1.250741000  | -2.917866000 | -0.649314000 |
| H  | 0.219710000  | -3.232703000 | -0.766371000 |
| C  | 2.304386000  | -3.854969000 | -0.776185000 |
| H  | 4.418669000  | -4.205561000 | -0.715135000 |
| H  | 2.060205000  | -4.890521000 | -0.994836000 |
| H  | -3.844146000 | 0.700235000  | -3.248350000 |
| H  | -5.916014000 | 1.147503000  | -1.952328000 |
| H  | -5.811395000 | 1.634704000  | 0.475424000  |
| H  | -3.623095000 | 1.720424000  | 1.654860000  |

|   |              |              |              |
|---|--------------|--------------|--------------|
| C | 1.705119000  | 2.454140000  | -1.251316000 |
| H | 1.405698000  | 1.823028000  | -2.097169000 |
| C | 3.059427000  | 3.088822000  | -1.561548000 |
| C | 0.596185000  | 3.479659000  | -1.012384000 |
| H | -0.349666000 | 2.988484000  | -0.775877000 |
| H | 0.852957000  | 4.164847000  | -0.198246000 |
| H | 0.458487000  | 4.074906000  | -1.919621000 |
| H | 3.425303000  | 3.705432000  | -0.735480000 |
| H | 2.951268000  | 3.741179000  | -2.433796000 |
| H | 3.817300000  | 2.338005000  | -1.795906000 |
| C | 1.566394000  | 2.031435000  | 1.782398000  |
| H | 0.591224000  | 2.528867000  | 1.708091000  |
| C | 2.660026000  | 3.053096000  | 2.088442000  |
| C | 1.473432000  | 0.937299000  | 2.849514000  |
| H | 0.612740000  | 0.283476000  | 2.685252000  |
| H | 2.382780000  | 0.327662000  | 2.869924000  |
| H | 1.360810000  | 1.407091000  | 3.831660000  |
| H | 3.640287000  | 2.572759000  | 2.159308000  |
| H | 2.454172000  | 3.517884000  | 3.057747000  |
| H | 2.713535000  | 3.851352000  | 1.344236000  |
| O | -1.392294000 | -0.991221000 | 2.069086000  |
| O | -1.435349000 | -1.627963000 | -0.588639000 |
| C | -2.498379000 | -1.180969000 | 1.524678000  |
| C | -3.757503000 | -1.131196000 | 2.222490000  |
| C | -4.934522000 | -1.343299000 | 1.561954000  |
| C | -4.960918000 | -1.622528000 | 0.164844000  |
| C | -3.793461000 | -1.740401000 | -0.554430000 |
| C | -2.547553000 | -1.485340000 | 0.061413000  |
| H | -3.794432000 | -1.980812000 | -1.611501000 |
| H | -5.914342000 | -1.792374000 | -0.324880000 |
| H | -5.875522000 | -1.295387000 | 2.103608000  |
| H | -3.723185000 | -0.917855000 | 3.286107000  |

Σ of electronic & zero-point Energies -1861.070483

Σ of electronic & thermal Free Energies -1861.132945

### TS2-H

|    |              |              |              |
|----|--------------|--------------|--------------|
| Au | 0.045491000  | 0.306310000  | -0.250628000 |
| P  | 1.689817000  | -1.222748000 | -0.047305000 |
| O  | -1.406894000 | -1.565793000 | 0.283091000  |
| O  | -1.244001000 | 0.288750000  | 2.269998000  |
| C  | 1.511233000  | 1.640338000  | 0.079875000  |
| C  | 3.174484000  | -0.186415000 | -0.006429000 |
| C  | 2.862090000  | 1.195368000  | 0.097754000  |
| C  | 3.916004000  | 2.146573000  | 0.245895000  |
| C  | 5.250100000  | 1.670413000  | 0.240352000  |
| H  | 6.059386000  | 2.388867000  | 0.340102000  |
| C  | 5.529995000  | 0.327763000  | 0.119343000  |
| H  | 6.559655000  | -0.015769000 | 0.122099000  |
| C  | 4.486908000  | -0.615879000 | 0.009508000  |
| H  | 4.727819000  | -1.671355000 | -0.040285000 |
| C  | -2.471491000 | -1.127117000 | 0.811807000  |
| C  | -3.767623000 | -1.610320000 | 0.449443000  |
| C  | -4.891536000 | -1.123393000 | 1.058837000  |
| C  | -4.801019000 | -0.149667000 | 2.104424000  |
| C  | -3.601879000 | 0.348968000  | 2.517064000  |
| C  | -2.367389000 | -0.105313000 | 1.918065000  |
| C  | 3.581323000  | 3.514575000  | 0.396324000  |
| C  | 1.213985000  | 2.970929000  | 0.247999000  |
| H  | 0.178903000  | 3.294737000  | 0.252226000  |
| C  | 2.264135000  | 3.907512000  | 0.407447000  |
| H  | 4.378969000  | 4.243297000  | 0.508846000  |
| H  | 2.012468000  | 4.956503000  | 0.533757000  |
| H  | -3.524868000 | 1.089937000  | 3.306387000  |

|   |              |              |              |
|---|--------------|--------------|--------------|
| H | -5.719590000 | 0.198970000  | 2.569316000  |
| H | -5.869495000 | -1.492607000 | 0.766930000  |
| H | -3.819051000 | -2.354623000 | -0.337514000 |
| C | 1.506754000  | -2.143054000 | 1.557932000  |
| H | 0.868246000  | -1.459144000 | 2.130935000  |
| C | 2.832311000  | -2.336880000 | 2.291605000  |
| C | 0.747855000  | -3.458287000 | 1.373276000  |
| H | -0.204998000 | -3.296638000 | 0.867398000  |
| H | 1.338649000  | -4.195977000 | 0.821562000  |
| H | 0.538208000  | -3.878896000 | 2.361822000  |
| H | 3.513103000  | -2.993548000 | 1.739775000  |
| H | 2.631289000  | -2.810963000 | 3.257471000  |
| H | 3.345360000  | -1.391470000 | 2.478378000  |
| C | 1.706524000  | -2.364987000 | -1.487949000 |
| H | 0.784673000  | -2.944039000 | -1.354053000 |
| C | 2.915253000  | -3.302317000 | -1.499111000 |
| C | 1.596239000  | -1.553689000 | -2.780636000 |
| H | 0.654173000  | -1.002487000 | -2.824915000 |
| H | 2.428188000  | -0.847564000 | -2.873680000 |
| H | 1.636744000  | -2.234836000 | -3.636737000 |
| H | 3.826738000  | -2.752879000 | -1.749408000 |
| H | 2.771310000  | -4.066303000 | -2.269339000 |
| H | 3.069004000  | -3.816692000 | -0.546617000 |
| O | -1.453961000 | -0.320206000 | -1.947397000 |
| O | -1.438371000 | 1.738251000  | -0.187828000 |
| C | -2.572965000 | 0.218073000  | -1.644666000 |
| C | -3.814457000 | -0.174795000 | -2.223734000 |
| C | -4.987740000 | 0.420866000  | -1.827337000 |
| C | -4.988349000 | 1.428153000  | -0.833317000 |
| C | -3.803899000 | 1.890936000  | -0.290794000 |
| C | -2.583578000 | 1.301238000  | -0.659313000 |
| H | -3.792087000 | -0.963454000 | -2.969085000 |
| H | -3.787671000 | 2.679005000  | 0.453845000  |
| H | -5.930741000 | 0.104444000  | -2.264020000 |
| H | -5.929209000 | 1.870691000  | -0.520924000 |

Σ of electronic & zero-point Energies -1861.059822

Σ of electronic & thermal Free Energies -1861.121956

### RC2-H

|    |              |              |              |
|----|--------------|--------------|--------------|
| Au | -0.153413000 | -0.493740000 | -0.597100000 |
| P  | -1.629012000 | 1.208815000  | -0.332470000 |
| O  | 2.221083000  | 2.665165000  | 1.426789000  |
| O  | 1.085182000  | 0.196252000  | 1.773893000  |
| C  | -1.644043000 | -1.635920000 | 0.117484000  |
| C  | -2.979590000 | 0.398820000  | 0.557385000  |
| C  | -2.820227000 | -1.012940000 | 0.625602000  |
| C  | -3.853844000 | -1.804251000 | 1.209941000  |
| C  | -5.000490000 | -1.144206000 | 1.717068000  |
| H  | -5.787223000 | -1.741587000 | 2.170274000  |
| C  | -5.126869000 | 0.224644000  | 1.647033000  |
| H  | -6.011826000 | 0.710935000  | 2.045341000  |
| C  | -4.113330000 | 1.009406000  | 1.056467000  |
| H  | -4.233230000 | 2.085655000  | 1.006046000  |
| C  | 2.947491000  | 1.683797000  | 1.550194000  |
| C  | 4.398707000  | 1.765481000  | 1.608980000  |
| C  | 5.146598000  | 0.642650000  | 1.743536000  |
| C  | 4.555072000  | -0.670946000 | 1.833160000  |
| C  | 3.208429000  | -0.848041000 | 1.803979000  |
| C  | 2.315236000  | 0.289668000  | 1.701823000  |
| C  | -3.686005000 | -3.209916000 | 1.260734000  |
| C  | -1.516097000 | -3.004423000 | 0.184720000  |
| H  | -0.612948000 | -3.477095000 | -0.188164000 |
| C  | -2.545657000 | -3.789442000 | 0.757217000  |

|   |              |              |              |
|---|--------------|--------------|--------------|
| H | -4.468853000 | -3.818519000 | 1.704588000  |
| H | -2.421831000 | -4.867728000 | 0.801239000  |
| H | 2.750077000  | -1.827494000 | 1.884515000  |
| H | 5.213273000  | -1.527564000 | 1.932839000  |
| H | 6.230408000  | 0.716841000  | 1.779843000  |
| H | 4.842303000  | 2.752825000  | 1.529281000  |
| C | -0.830231000 | 2.603596000  | 0.561586000  |
| H | -0.087116000 | 2.089905000  | 1.187542000  |
| C | -1.766621000 | 3.411847000  | 1.455451000  |
| C | -0.053035000 | 3.460731000  | -0.439573000 |
| H | 0.621857000  | 2.845272000  | -1.039980000 |
| H | -0.716057000 | 4.035735000  | -1.094737000 |
| H | 0.570622000  | 4.158024000  | 0.123412000  |
| H | -2.536384000 | 3.945617000  | 0.888470000  |
| H | -1.169284000 | 4.160247000  | 1.985079000  |
| H | -2.255006000 | 2.785387000  | 2.205506000  |
| C | -2.292179000 | 1.745237000  | -1.969912000 |
| H | -1.413178000 | 2.147818000  | -2.487660000 |
| C | -3.358226000 | 2.833058000  | -1.844323000 |
| C | -2.813027000 | 0.528645000  | -2.735576000 |
| H | -2.031618000 | -0.221242000 | -2.883133000 |
| H | -3.642020000 | 0.053764000  | -2.201574000 |
| H | -3.177990000 | 0.843315000  | -3.718196000 |
| H | -4.244703000 | 2.451520000  | -1.329376000 |
| H | -3.669747000 | 3.153115000  | -2.843671000 |
| H | -2.996658000 | 3.714873000  | -1.310489000 |
| O | 1.427541000  | 0.631370000  | -1.277538000 |
| O | 1.195328000  | -2.013405000 | -0.787412000 |
| C | 2.538477000  | -0.090075000 | -1.181890000 |
| C | 3.811184000  | 0.475982000  | -1.321920000 |
| C | 4.938000000  | -0.333745000 | -1.255752000 |
| C | 4.808965000  | -1.720587000 | -1.092848000 |
| C | 3.555570000  | -2.311323000 | -0.973048000 |
| C | 2.412588000  | -1.508513000 | -0.970113000 |
| H | 3.440144000  | -3.381404000 | -0.834321000 |
| H | 3.885428000  | 1.547917000  | -1.470294000 |
| H | 5.698244000  | -2.343746000 | -1.065287000 |
| H | 5.923992000  | 0.110353000  | -1.349435000 |

Σ of electronic & zero-point Energies -1861.081608

Σ of electronic & thermal Free Energies -1861.143980

### **Optimization GAS PHASE, Singlet state,** **(P,C)Au(O,O)H<sub>4</sub> + o-quinone-Cl<sub>2</sub>**

- Approach *trans* to P

#### **RC1-Cl<sub>2</sub>**

|    |              |              |              |
|----|--------------|--------------|--------------|
| Au | -0.769786000 | -0.374437000 | 0.592119000  |
| P  | -2.287369000 | 1.243278000  | 0.112380000  |
| O  | 0.702829000  | 0.814174000  | 1.412869000  |
| O  | 0.579650000  | -1.852000000 | 1.055106000  |
| C  | -2.214703000 | -1.618900000 | -0.037912000 |
| C  | -3.794427000 | 0.277821000  | -0.153708000 |
| C  | -3.525991000 | -1.114172000 | -0.266471000 |
| C  | -4.579214000 | -2.002883000 | -0.635437000 |
| C  | -5.872247000 | -1.461184000 | -0.840785000 |
| H  | -6.682124000 | -2.134018000 | -1.110031000 |
| C  | -6.110975000 | -0.111742000 | -0.710102000 |
| H  | -7.108886000 | 0.282733000  | -0.873735000 |
| C  | -5.063695000 | 0.774277000  | -0.377596000 |

|    |              |              |              |
|----|--------------|--------------|--------------|
| H  | -5.267761000 | 1.836549000  | -0.306194000 |
| C  | 1.816073000  | 0.111518000  | 1.541659000  |
| C  | 3.043703000  | 0.701387000  | 1.876008000  |
| C  | 4.167190000  | -0.091582000 | 2.051872000  |
| C  | 4.078139000  | -1.491300000 | 1.950527000  |
| C  | 2.880467000  | -2.106588000 | 1.629145000  |
| C  | 1.739141000  | -1.321306000 | 1.390361000  |
| C  | -4.283249000 | -3.380293000 | -0.782565000 |
| C  | -1.958535000 | -2.959704000 | -0.206604000 |
| H  | -0.954924000 | -3.338720000 | -0.043413000 |
| C  | -3.003042000 | -3.839245000 | -0.580383000 |
| H  | -5.079956000 | -4.063718000 | -1.062419000 |
| H  | -2.781042000 | -4.895306000 | -0.703392000 |
| H  | 2.797646000  | -3.183794000 | 1.530551000  |
| H  | 4.966233000  | -2.095932000 | 2.103205000  |
| H  | 5.119806000  | 0.370890000  | 2.288750000  |
| H  | 3.086041000  | 1.780716000  | 1.974458000  |
| C  | -2.387776000 | 2.415973000  | 1.536708000  |
| H  | -2.208655000 | 1.757432000  | 2.395388000  |
| C  | -3.745103000 | 3.090943000  | 1.724574000  |
| C  | -1.223274000 | 3.407071000  | 1.442323000  |
| H  | -0.269378000 | 2.893851000  | 1.294656000  |
| H  | -1.373156000 | 4.119342000  | 0.625671000  |
| H  | -1.165638000 | 3.976994000  | 2.374737000  |
| H  | -4.008440000 | 3.732330000  | 0.879169000  |
| H  | -3.702484000 | 3.725536000  | 2.615505000  |
| H  | -4.544686000 | 2.361379000  | 1.871516000  |
| C  | -1.887529000 | 2.113983000  | -1.457111000 |
| H  | -0.909689000 | 2.565046000  | -1.260684000 |
| C  | -2.920010000 | 3.180397000  | -1.818866000 |
| C  | -1.708760000 | 1.078202000  | -2.567388000 |
| H  | -0.878686000 | 0.404498000  | -2.342162000 |
| H  | -2.622178000 | 0.496106000  | -2.727290000 |
| H  | -1.475688000 | 1.602788000  | -3.499331000 |
| H  | -3.903746000 | 2.737396000  | -2.001246000 |
| H  | -2.605990000 | 3.672058000  | -2.744901000 |
| H  | -3.019183000 | 3.954743000  | -1.054219000 |
| O  | 1.214603000  | 1.989543000  | -1.134822000 |
| O  | 0.904034000  | -0.722486000 | -1.578265000 |
| C  | 2.195744000  | 1.248186000  | -1.143121000 |
| C  | 3.552885000  | 1.744669000  | -1.002994000 |
| C  | 4.616369000  | 0.902987000  | -0.978757000 |
| C  | 4.445413000  | -0.533629000 | -1.095136000 |
| C  | 3.209549000  | -1.075438000 | -1.251579000 |
| C  | 2.021305000  | -0.252466000 | -1.329123000 |
| H  | 3.684976000  | 2.814383000  | -0.893153000 |
| H  | 3.079556000  | -2.144684000 | -1.361762000 |
| Cl | 5.838103000  | -1.568100000 | -1.100832000 |
| Cl | 6.210018000  | 1.553218000  | -0.776646000 |

Σ of electronic & zero-point Energies -2780.193916

Σ of electronic & thermal Free Energies -2780.260370

#### **TS1-Cl<sub>2</sub>**

|    |              |              |              |
|----|--------------|--------------|--------------|
| Au | -0.677161000 | 0.175078000  | -0.324436000 |
| P  | -2.455121000 | -1.177123000 | -0.017978000 |
| O  | 0.678924000  | -1.402940000 | -0.589362000 |
| O  | 0.712357000  | 0.861521000  | -2.089161000 |
| C  | -2.001057000 | 1.652326000  | -0.046737000 |
| C  | -3.813759000 | -0.005994000 | 0.196236000  |
| C  | -3.374090000 | 1.343724000  | 0.161491000  |
| C  | -4.321456000 | 2.394215000  | 0.346546000  |
| C  | -5.674855000 | 2.041113000  | 0.571042000  |
| H  | -6.403129000 | 2.835139000  | 0.713053000  |

|                                                |              |              |              |    |              |              |              |
|------------------------------------------------|--------------|--------------|--------------|----|--------------|--------------|--------------|
| C                                              | -6.074562000 | 0.723862000  | 0.614037000  | C  | -4.307017000 | 2.459018000  | -0.196285000 |
| H                                              | -7.116348000 | 0.476863000  | 0.792128000  | C  | -5.668095000 | 2.153120000  | 0.050634000  |
| C                                              | -5.140063000 | -0.316512000 | 0.425741000  | H  | -6.397670000 | 2.957289000  | 0.005109000  |
| H                                              | -5.474785000 | -1.347241000 | 0.461116000  | C  | -6.073645000 | 0.870416000  | 0.343661000  |
| C                                              | 1.794817000  | -1.019045000 | -1.150400000 | H  | -7.121804000 | 0.659497000  | 0.530407000  |
| C                                              | 2.980035000  | -1.772212000 | -1.031993000 | C  | -5.135226000 | -0.181390000 | 0.397841000  |
| C                                              | 4.142845000  | -1.330421000 | -1.628786000 | H  | -5.474180000 | -1.188719000 | 0.613417000  |
| C                                              | 4.149507000  | -0.169728000 | -2.442703000 | C  | 1.741296000  | -1.523380000 | -0.242555000 |
| C                                              | 3.015440000  | 0.584073000  | -2.608114000 | C  | 2.930653000  | -1.959759000 | 0.385732000  |
| C                                              | 1.795152000  | 0.203596000  | -1.970932000 | C  | 4.107489000  | -2.014125000 | -0.325010000 |
| C                                              | -3.864259000 | 3.734093000  | 0.299606000  | C  | 4.135039000  | -1.737461000 | -1.723379000 |
| C                                              | -1.587340000 | 2.962607000  | -0.081195000 | C  | 3.008245000  | -1.364057000 | -2.398410000 |
| H                                              | -0.536765000 | 3.191414000  | -0.223291000 | C  | 1.745782000  | -1.245891000 | -1.713000000 |
| C                                              | -2.532922000 | 4.003592000  | 0.088224000  | C  | -3.853482000 | 3.765256000  | -0.503254000 |
| H                                              | -4.579030000 | 4.540718000  | 0.435251000  | C  | -1.566300000 | 2.952761000  | -0.652821000 |
| H                                              | -2.187650000 | 5.032783000  | 0.055001000  | H  | -0.515281000 | 3.155365000  | -0.825877000 |
| H                                              | 3.004937000  | 1.485041000  | -3.212545000 | C  | -2.518121000 | 3.998280000  | -0.728558000 |
| H                                              | 5.076815000  | 0.136873000  | -2.916314000 | H  | -4.575579000 | 4.574972000  | -0.557167000 |
| H                                              | 5.062911000  | -1.888887000 | -1.490190000 | H  | -2.175390000 | 5.001325000  | -0.965194000 |
| H                                              | 2.958487000  | -2.666174000 | -0.418355000 | H  | 3.017159000  | -1.147624000 | -3.461662000 |
| C                                              | -2.707787000 | -2.268477000 | -1.489844000 | H  | 5.082198000  | -1.809964000 | -2.249261000 |
| H                                              | -2.466395000 | -1.589423000 | -2.317159000 | H  | 5.026388000  | -2.301559000 | 0.175298000  |
| C                                              | -4.142440000 | -2.761621000 | -1.675090000 | H  | 2.892553000  | -2.186215000 | 1.445430000  |
| C                                              | -1.676487000 | -3.399612000 | -1.478659000 | C  | -2.624775000 | -2.336030000 | -1.202111000 |
| H                                              | -0.663686000 | -3.016881000 | -1.325497000 | H  | -2.301538000 | -1.740408000 | -2.064764000 |
| H                                              | -1.896145000 | -4.132235000 | -0.696303000 | C  | -4.054804000 | -2.817178000 | -1.441291000 |
| H                                              | -1.709672000 | -3.922097000 | -2.439412000 | C  | -1.625359000 | -3.478267000 | -1.014619000 |
| H                                              | -4.468907000 | -3.404482000 | -0.853204000 | H  | -0.619314000 | -3.096651000 | -0.830452000 |
| H                                              | -4.193344000 | -3.354029000 | -2.594159000 | H  | -1.913547000 | -4.130699000 | -0.184407000 |
| H                                              | -4.847489000 | -1.933295000 | -1.771741000 | H  | -1.602139000 | -4.085332000 | -1.924113000 |
| C                                              | -2.200633000 | -2.132750000 | 1.535167000  | H  | -4.444253000 | -3.391364000 | -0.595731000 |
| H                                              | -1.232779000 | -2.625102000 | 1.376989000  | H  | -4.062945000 | -3.475712000 | -2.315464000 |
| C                                              | -3.291914000 | -3.171625000 | 1.792596000  | H  | -4.735984000 | -1.986945000 | -1.640236000 |
| C                                              | -2.062300000 | -1.144434000 | 2.694955000  | C  | -2.283695000 | -1.934343000 | 1.819208000  |
| H                                              | -1.221505000 | -0.466235000 | 2.536223000  | H  | -1.371313000 | -2.531488000 | 1.697547000  |
| H                                              | -2.982281000 | -0.567810000 | 2.832682000  | C  | -3.461565000 | -2.836359000 | 2.183775000  |
| H                                              | -1.869043000 | -1.704670000 | 3.614545000  | C  | -2.022634000 | -0.857286000 | 2.875784000  |
| H                                              | -4.267395000 | -2.695102000 | 1.929262000  | H  | -1.108110000 | -0.296415000 | 2.665649000  |
| H                                              | -3.059112000 | -3.706681000 | 2.718479000  | H  | -2.861194000 | -0.156285000 | 2.940514000  |
| H                                              | -3.371940000 | -3.912254000 | 0.994066000  | H  | -1.909054000 | -1.337691000 | 3.852557000  |
| O                                              | 1.028006000  | -0.685047000 | 1.999999000  | H  | -4.380766000 | -2.255998000 | 2.305281000  |
| O                                              | 0.977652000  | 1.583411000  | 0.438622000  | H  | -3.254976000 | -3.323599000 | 3.141725000  |
| C                                              | 2.092473000  | -0.211250000 | 1.578894000  | H  | -3.637456000 | -3.621878000 | 1.444931000  |
| C                                              | 3.383452000  | -0.780546000 | 1.885556000  | O  | 0.995861000  | 0.755013000  | 1.938646000  |
| C                                              | 4.535721000  | -0.237489000 | 1.401627000  | O  | 0.966648000  | 1.386833000  | -0.726524000 |
| C                                              | 4.512636000  | 0.930151000  | 0.563905000  | C  | 2.081636000  | 0.827841000  | 1.329179000  |
| C                                              | 3.324257000  | 1.529227000  | 0.243008000  | C  | 3.360295000  | 0.626348000  | 1.952535000  |
| C                                              | 2.077729000  | 1.002832000  | 0.696362000  | C  | 4.522212000  | 0.706825000  | 1.236081000  |
| H                                              | 3.302709000  | 2.420823000  | -0.370857000 | C  | 4.507711000  | 1.008725000  | -0.161413000 |
| H                                              | 3.405263000  | -1.665660000 | 2.509832000  | C  | 3.315950000  | 1.253940000  | -0.807457000 |
| Cl                                             | 5.996001000  | 1.643082000  | 0.009285000  | C  | 2.085939000  | 1.127843000  | -0.128573000 |
| Cl                                             | 6.054261000  | -0.987402000 | 1.786979000  | H  | 3.301493000  | 1.514027000  | -1.858187000 |
| $\Sigma$ of electronic & zero-point Energies   |              |              | -2780.175221 | H  | 3.374779000  | 0.393954000  | 3.010460000  |
| $\Sigma$ of electronic & thermal Free Energies |              |              | -2780.239898 | Cl | 6.034208000  | 0.414310000  | 2.041408000  |
|                                                |              |              |              | Cl | 5.992407000  | 1.187619000  | -1.044447000 |

#### INT-Cl<sub>2</sub>

|    |              |              |              |
|----|--------------|--------------|--------------|
| Au | -0.648539000 | 0.174291000  | -0.162119000 |
| P  | -2.454053000 | -1.121653000 | 0.179901000  |
| O  | 0.616190000  | -1.461820000 | 0.392905000  |
| O  | 0.672532000  | -0.942106000 | -2.269919000 |
| C  | -1.970937000 | 1.673277000  | -0.352613000 |
| C  | -3.799432000 | 0.082742000  | 0.165385000  |
| C  | -3.351992000 | 1.400441000  | -0.127821000 |

$\Sigma$  of electronic & zero-point Energies -2780.183564  
 $\Sigma$  of electronic & thermal Free Energies -2780.249861

#### TS2-Cl<sub>2</sub>

|    |              |              |              |
|----|--------------|--------------|--------------|
| Au | 0.613081000  | 0.236713000  | -0.162424000 |
| P  | 2.377431000  | -1.166213000 | -0.040544000 |
| O  | -0.686591000 | -1.645547000 | 0.636285000  |
| O  | -0.540122000 | 0.386647000  | 2.443131000  |

|                                                             |              |              |              |                                                             |              |              |              |
|-------------------------------------------------------------|--------------|--------------|--------------|-------------------------------------------------------------|--------------|--------------|--------------|
| C                                                           | 2.002983000  | 1.684360000  | -0.055191000 | P                                                           | -2.289249000 | 1.130943000  | -0.398446000 |
| C                                                           | 3.781231000  | -0.029777000 | -0.155317000 | O                                                           | 1.326532000  | 2.890990000  | 1.581479000  |
| C                                                           | 3.379000000  | 1.331499000  | -0.114979000 | O                                                           | 0.353145000  | 0.354079000  | 1.929057000  |
| C                                                           | 4.369697000  | 2.359048000  | -0.114467000 | C                                                           | -2.103211000 | -1.699567000 | 0.098752000  |
| C                                                           | 5.730441000  | 1.973645000  | -0.192908000 | C                                                           | -3.631373000 | 0.221028000  | 0.401506000  |
| H                                                           | 6.491074000  | 2.749684000  | -0.203407000 | C                                                           | -3.360805000 | -1.170942000 | 0.507744000  |
| C                                                           | 6.096561000  | 0.647506000  | -0.248590000 | C                                                           | -4.365189000 | -2.039520000 | 1.029582000  |
| H                                                           | 7.145540000  | 0.374466000  | -0.304607000 | C                                                           | -5.597646000 | -1.472338000 | 1.438129000  |
| C                                                           | 5.118757000  | -0.368886000 | -0.217223000 | H                                                           | -6.363562000 | -2.128134000 | 1.843538000  |
| H                                                           | 5.430561000  | -1.406849000 | -0.223655000 | C                                                           | -5.832333000 | -0.120103000 | 1.332495000  |
| C                                                           | -1.743424000 | -1.239393000 | 1.199601000  | H                                                           | -6.782206000 | 0.294570000  | 1.654850000  |
| C                                                           | -3.021791000 | -1.840277000 | 0.969245000  | C                                                           | -4.846378000 | 0.740106000  | 0.803744000  |
| C                                                           | -4.138548000 | -1.365148000 | 1.598083000  | H                                                           | -5.051691000 | 1.801593000  | 0.724337000  |
| C                                                           | -4.058642000 | -0.291864000 | 2.545768000  | C                                                           | 2.112681000  | 1.972779000  | 1.782308000  |
| C                                                           | -2.877916000 | 0.318385000  | 2.837219000  | C                                                           | 3.550561000  | 2.163918000  | 1.919629000  |
| C                                                           | -1.648232000 | -0.111958000 | 2.204251000  | C                                                           | 4.365161000  | 1.106252000  | 2.146585000  |
| C                                                           | 3.949703000  | 3.709096000  | -0.030574000 | C                                                           | 3.863547000  | -0.246098000 | 2.240600000  |
| C                                                           | 1.622954000  | 3.000502000  | 0.042689000  | C                                                           | 2.539546000  | -0.526537000 | 2.136447000  |
| H                                                           | 0.570844000  | 3.255721000  | 0.104712000  | C                                                           | 1.573070000  | 0.538151000  | 1.941619000  |
| C                                                           | 2.612318000  | 4.013864000  | 0.055657000  | C                                                           | -4.084473000 | -3.425107000 | 1.119375000  |
| H                                                           | 4.699102000  | 4.495336000  | -0.029759000 | C                                                           | -1.865591000 | -3.050909000 | 0.200049000  |
| H                                                           | 2.295585000  | 5.050050000  | 0.129292000  | H                                                           | -0.901799000 | -3.450996000 | -0.098246000 |
| H                                                           | -2.809011000 | 1.137606000  | 3.545606000  | C                                                           | -2.865741000 | -3.912703000 | 0.711409000  |
| H                                                           | -4.975162000 | 0.046196000  | 3.020406000  | H                                                           | -4.844405000 | -4.092135000 | 1.516461000  |
| H                                                           | -5.106459000 | -1.811273000 | 1.393314000  | H                                                           | -2.655762000 | -4.975834000 | 0.784721000  |
| H                                                           | -3.069643000 | -2.655524000 | 0.255683000  | H                                                           | 2.152047000  | -1.536695000 | 2.211258000  |
| C                                                           | 2.389564000  | -2.059986000 | 1.588227000  | H                                                           | 4.578344000  | -1.047188000 | 2.399091000  |
| H                                                           | 1.782410000  | -1.392935000 | 2.212301000  | H                                                           | 5.436706000  | 1.257882000  | 2.234124000  |
| C                                                           | 3.785825000  | -2.186861000 | 2.195077000  | H                                                           | 3.928138000  | 3.176521000  | 1.822517000  |
| C                                                           | 1.672808000  | -3.408372000 | 1.493007000  | C                                                           | -1.672513000 | 2.591927000  | 0.534671000  |
| H                                                           | 0.672291000  | -3.298046000 | 1.072468000  | H                                                           | -0.939393000 | 2.143995000  | 1.219513000  |
| H                                                           | 2.243682000  | -4.130494000 | 0.901484000  | C                                                           | -2.736401000 | 3.323661000  | 1.348456000  |
| H                                                           | 1.570537000  | -3.818937000 | 2.502361000  | C                                                           | -0.897200000 | 3.505682000  | -0.416623000 |
| H                                                           | 4.436825000  | -2.828440000 | 1.592307000  | H                                                           | -0.132199000 | 2.946396000  | -0.961094000 |
| H                                                           | 3.696355000  | -2.648754000 | 3.183271000  | H                                                           | -1.555634000 | 4.020748000  | -1.123891000 |
| H                                                           | 4.274994000  | -1.218491000 | 2.316930000  | H                                                           | -0.376117000 | 4.255693000  | 0.181767000  |
| C                                                           | 2.359561000  | -2.338503000 | -1.457668000 | H                                                           | -3.502240000 | 3.790166000  | 0.720385000  |
| H                                                           | 1.483948000  | -2.966197000 | -1.251740000 | H                                                           | -2.244058000 | 4.120920000  | 1.913521000  |
| C                                                           | 3.617792000  | -3.204989000 | -1.533730000 | H                                                           | -3.226653000 | 2.661726000  | 2.065970000  |
| C                                                           | 2.117851000  | -1.563331000 | -2.754662000 | C                                                           | -2.864563000 | 1.597436000  | -2.089114000 |
| H                                                           | 1.145781000  | -1.065380000 | -2.745445000 | H                                                           | -1.984273000 | 2.066817000  | -2.544679000 |
| H                                                           | 2.901371000  | -0.815991000 | -2.918196000 | C                                                           | -4.022294000 | 2.594844000  | -2.058694000 |
| H                                                           | 2.137639000  | -2.260744000 | -3.598089000 | C                                                           | -3.225104000 | 0.335794000  | -2.873993000 |
| H                                                           | 4.480020000  | -2.607059000 | -1.840962000 | H                                                           | -2.376236000 | -0.348192000 | -2.953207000 |
| H                                                           | 3.472608000  | -3.983023000 | -2.289419000 | H                                                           | -4.050463000 | -0.201615000 | -2.396730000 |
| H                                                           | 3.855889000  | -3.701042000 | -0.589075000 | H                                                           | -3.539351000 | 0.611724000  | -3.885241000 |
| O                                                           | -0.967391000 | -0.611000000 | -1.702519000 | H                                                           | -4.912038000 | 2.144573000  | -1.609133000 |
| O                                                           | -0.956604000 | 1.580429000  | -0.098219000 | H                                                           | -4.279930000 | 2.882235000  | -3.082888000 |
| C                                                           | -2.089145000 | -0.114169000 | -1.348314000 | H                                                           | -3.776532000 | 3.506637000  | -1.509643000 |
| C                                                           | -3.340679000 | -0.635267000 | -1.773850000 | O                                                           | 0.869230000  | 0.797759000  | -1.121042000 |
| C                                                           | -4.522101000 | -0.096144000 | -1.319993000 | O                                                           | 0.816731000  | -1.856244000 | -0.602080000 |
| C                                                           | -4.515628000 | 0.999584000  | -0.419380000 | C                                                           | 2.020052000  | 0.165676000  | -0.941743000 |
| C                                                           | -3.320703000 | 1.580070000  | -0.031956000 | C                                                           | 3.247957000  | 0.830322000  | -1.004385000 |
| C                                                           | -2.097679000 | 1.039206000  | -0.452059000 | C                                                           | 4.434462000  | 0.123946000  | -0.841629000 |
| H                                                           | -3.341425000 | -1.487934000 | -2.442069000 | C                                                           | 4.406488000  | -1.264980000 | -0.639891000 |
| H                                                           | -3.314970000 | 2.431291000  | 0.636974000  | C                                                           | 3.195311000  | -1.951132000 | -0.602580000 |
| Cl                                                          | -6.002821000 | 1.685092000  | 0.162486000  | C                                                           | 1.995073000  | -1.251758000 | -0.708405000 |
| Cl                                                          | -6.023941000 | -0.811308000 | -1.825322000 | H                                                           | 3.176317000  | -3.021425000 | -0.436597000 |
| $\Sigma$ of electronic & zero-point Energies -2780.173272   |              |              |              | H                                                           | 3.262881000  | 1.898805000  | -1.180246000 |
| $\Sigma$ of electronic & thermal Free Energies -2780.239490 |              |              |              | Cl                                                          | 5.877422000  | -2.168878000 | -0.430773000 |
| <b>RC2-Cl<sub>2</sub></b>                                   |              |              |              | Cl                                                          | 5.938258000  | 0.994876000  | -0.922202000 |
| Au                                                          | -0.664448000 | -0.447551000 | -0.530744000 | $\Sigma$ of electronic & zero-point Energies -2780.195533   |              |              |              |
|                                                             |              |              |              | $\Sigma$ of electronic & thermal Free Energies -2780.262010 |              |              |              |

**o-quinone-Cl<sub>2</sub>**

|                                         |              |              |              |
|-----------------------------------------|--------------|--------------|--------------|
| O                                       | 2.933360000  | 1.387630000  | 0.000102000  |
| O                                       | 2.933360000  | -1.387630000 | -0.000092000 |
| C                                       | 1.885466000  | 0.772476000  | 0.000067000  |
| C                                       | 0.580228000  | 1.442169000  | 0.000056000  |
| C                                       | -0.570045000 | 0.738760000  | 0.000029000  |
| C                                       | -0.570045000 | -0.738760000 | -0.000029000 |
| C                                       | 0.580228000  | -1.442169000 | -0.000051000 |
| C                                       | 1.885466000  | -0.772476000 | -0.000051000 |
| Cl                                      | -2.083443000 | -1.565370000 | -0.000048000 |
| Cl                                      | -2.083443000 | 1.565370000  | 0.000035000  |
| H                                       | 0.577758000  | -2.526008000 | -0.000087000 |
| H                                       | 0.577758000  | 2.526008000  | 0.000089000  |
| Σ of electronic & zero-point Energies   |              |              | -1300.337048 |
| Σ of electronic & thermal Free Energies |              |              | -1300.372095 |

|                                         |              |              |              |
|-----------------------------------------|--------------|--------------|--------------|
| H                                       | -2.923660000 | -3.999681000 | 0.795716000  |
| Cl                                      | 6.450041000  | 1.677791000  | -0.004605000 |
| Cl                                      | 6.380021000  | -1.533446000 | 0.099767000  |
| H                                       | 3.664379000  | -2.348333000 | 0.085266000  |
| H                                       | 3.772069000  | 2.608948000  | -0.077738000 |
| Σ of electronic & zero-point Energies   |              |              | -2398.918220 |
| Σ of electronic & thermal Free Energies |              |              | -2398.977166 |

**(P,C)Au(O,O)Cl<sub>2</sub>**

|    |              |              |              |
|----|--------------|--------------|--------------|
| Au | -0.172855000 | 0.238446000  | -0.062720000 |
| P  | -1.914244000 | -1.219234000 | -0.044286000 |
| O  | 1.298853000  | -1.171609000 | 0.012937000  |
| O  | 1.361467000  | 1.540181000  | -0.083064000 |
| C  | -1.607737000 | 1.651727000  | -0.096913000 |
| C  | -3.344087000 | -0.116459000 | -0.032549000 |
| C  | -2.978547000 | 1.259194000  | -0.062375000 |
| C  | -4.006619000 | 2.249513000  | -0.052789000 |
| C  | -5.355767000 | 1.820012000  | -0.003460000 |
| H  | -6.140608000 | 2.571700000  | 0.006050000  |
| C  | -5.681976000 | 0.482822000  | 0.033334000  |
| H  | -6.722462000 | 0.176465000  | 0.072367000  |
| C  | -4.670572000 | -0.500386000 | 0.017049000  |
| H  | -4.946395000 | -1.549115000 | 0.037430000  |
| C  | 2.499072000  | -0.550286000 | 0.006820000  |
| C  | 3.690635000  | -1.265367000 | 0.048943000  |
| C  | 4.914321000  | -0.592836000 | 0.045764000  |
| C  | 4.944608000  | 0.801405000  | 0.000771000  |
| C  | 3.751621000  | 1.526081000  | -0.042055000 |
| C  | 2.530642000  | 0.861392000  | -0.039912000 |
| C  | -3.634310000 | 3.615878000  | -0.088438000 |
| C  | -1.286379000 | 2.990145000  | -0.129656000 |
| H  | -0.241990000 | 3.286122000  | -0.153178000 |
| C  | -2.306795000 | 3.970960000  | -0.127533000 |
| H  | -4.412189000 | 4.374131000  | -0.082695000 |
| H  | -2.027666000 | 5.020246000  | -0.154393000 |
| C  | -1.874693000 | -2.276727000 | -1.558158000 |
| H  | -1.581758000 | -1.552346000 | -2.329254000 |
| C  | -3.218700000 | -2.881626000 | -1.958710000 |
| C  | -0.753814000 | -3.310429000 | -1.417201000 |
| H  | 0.188729000  | -2.844662000 | -1.111140000 |
| H  | -1.016780000 | -4.082812000 | -0.687521000 |
| H  | -0.599018000 | -3.806368000 | -2.380019000 |
| H  | -3.591546000 | -3.591139000 | -1.215473000 |
| H  | -3.093742000 | -3.428183000 | -2.898736000 |
| H  | -3.978081000 | -2.112585000 | -2.116996000 |
| C  | -1.849344000 | -2.222460000 | 1.499536000  |
| H  | -0.868629000 | -2.710904000 | 1.434630000  |
| C  | -2.948548000 | -3.276971000 | 1.613874000  |
| C  | -1.847091000 | -1.269832000 | 2.697571000  |
| H  | -1.014771000 | -0.562611000 | 2.650635000  |
| H  | -2.779851000 | -0.699805000 | 2.749596000  |
| H  | -1.748692000 | -1.847998000 | 3.621074000  |
| H  | -3.939575000 | -2.815089000 | 1.645046000  |
| H  | -2.817640000 | -3.831622000 | 2.548278000  |

## 14. References

- [1] F. Rekhroukh, R. Brousses, A. Amgoune, D. Bourissou, *Angew. Chem. Int. Ed.*, **2015**, *54*, 1266.
- [2] M. Joost, A. Zeineddine, L. Estévez, S. Mallet-Ladeira, K. Miqueu, A. Amgoune, D. Bourissou, *J. Am. Chem. Soc.*, **2014**, *136*, 14654.
- [3] R. K. M. Khan, S. Torker, A. H. Hoveyda, *J. Am. Chem. Soc.*, **2013**, *135*, 10258.
- [4] C.-X. Yin, R. G. Finke, *J. Am. Chem. Soc.*, **2005**, *127*, 9003.
- [5] J. Mancebo-Aracil, C. Casagualda, M. Á. Moreno-Villaécija, F. Nador, J. García-Pardo, A. Franconetti-García, F. Busqué, R. Alibés, M. J. Esplandiú, D. Ruiz-Molina, J. Sedó-Vegara, *Chem.-Eur. J.*, **2019**, *25*, 12367.
- [6] G. Szalóki, J. Babinot, V. Martin-Diaconescu, S. Mallet-Ladeira, Y. García-Rodeja, K. Miqueu, D. Bourissou, *Chem. Sci.*, **2022**, *13*, 10499.
- [7] L. Yang, D. R. Powell and R. P. Houser, *Dalton Trans.*, **2007**, 955.
- [8] S. N. Brown, *Inorg. Chem.*, **2012**, *51*, 1251.
- [9] Bruker, SADABS, Bruker AXS Inc., Madison, Wisconsin, USA, **2008**.
- [10] G. M. Sheldrick, *Acta Cryst. A Found Adv.*, **2015**, *71*, 3.
- [11] G. M. Sheldrick, *Acta Cryst. C Found Adv.*, **2015**, *71*, 3.
- [12] A. L. Spek, *Acta Cryst. C Struct. Chem.*, **2015**, *71*, 9.
- [13] Gaussian 16, Revision B.01, M. J. Frisch, G. W. Trucks, H. B. Schlegel, G. E. Scuseria, M. A. Robb, J. R. Cheeseman, G. Scalmani, V. Barone, G. A. Petersson, H. Nakatsuji, X. Li, M. Marenich, A. V.; Bloino, J.; Janesko, B. G.; Gomperts, R.; Mennucci, B.; Hratchian, H. P.; Ortiz, J. V. Caricato, A. F. Izmaylov, J. L. Sonnenberg, D. Williams-Young, F. Ding, F. Lipparini, F. Egidi, J. Goings, B. Peng, A. Petrone, T. Henderson, D. Ranasinghe, V. G. Zakrzewski, J. Gao, N. Rega, G. Zheng, W. Liang, M. Hada, M. Ehara, K. Toyota, R. Fukuda, J. Hasegawa, M. Ishida, T. Nakajima, Y. Honda, O. Kitao, H. Nakai, T. Vreven, K. Throssell, J. A. Jr. Montgomery, J. E. Peralta, F. Ogliaro, M. J. Bearpark, J. J. Heyd, E. N. Brothers, K. N. Kudin, V. N. Staroverov, T. A. Keith, R. Kobayashi, J. Normand, K. Raghavachari, A. P. Rendell, J. C. Burant, S. S. Iyengar, J. Tomasi, M. Cossi, J. M. Millam, M. Klene, C. Adamo, R. Cammi, J. W. Ochterski, R. L. Martin, K. Morokuma, O. Farkas, J. B. Foresman, D. J. Fox, Gaussian, Inc., Wallingford CT, **2016**.
- [14] (a) A. D. Becke, *J. Chem. Phys.*, **1993**, *98*, 5648; (b) J. P. Perdew, in *Electronic Structure of Solids '91*, Ed. P. Ziesche and H. Eschrig, Akademie Verlag, Berlin, **1991**, 11.
- [15] (a) S. Grimme, J. Antony, S. Ehrlich, H. Krieg, *J. Chem. Phys.*, **2010**, *132*, 154104; (b) S. Grimme, S. Ehrlich, L. Goerigk, *J. Comput. Chem.*, **2011**, *32*, 1456.
- [16] A. V. Marenich, C. J. Cramer, D. G. Truhlar, *J. Phys. Chem., B* **2009**, *113*, 6378.
- [17] A. B. F. Da Silva, H. F. M. Da Costa, M. Trsic, *Mol. Phys.*, **1989**, *68*, 433.
- [18] A. W. Ehlers, M. Böhme, S. Dapprich, A. Gobbi, A. Höllwarth, V. Jonas, K. F. Köhler, R. Stegmann, A. Veldkamp, G. Frenking, *Chem. Phys. Lett.*, **1993**, *208*, 111.
- [19] (a) K. Fukui, *Acc. Chem. Res.*, **1981**, *14*, 363; (b), H. P. Hratchian, H. B. Schlegel, in *Theory and Applications of Computational Chemistry: The First 40 Years*, Ed. C. E. Dykstra, G. Frenking, K. S. Kim, G. Scuseria, Elsevier, Amsterdam, **2005**, 195.
- [20] (a) M. P. Mitoraj, A. Michalak, T. Ziegler, *J. Chem. Theory Comput.*, **2009**, *5*, 962; (b) K. Morokuma, *J. Chem. Phys.*, **1971**, *55*, 1236; (c) T. Ziegler, A. Rauk, *Theoret. Chim. Acta*, **1977**, *46*, 1.
- [21] (a) G. Te Velde, F. M. Bickelhaupt, E. J. Baerends, C. Fonseca Guerra, S. J. A. Van Gisbergen, J. G. Snijders, T. Ziegler, *J. Comput. Chem.*, **2001**, *22*, 931.
- [22] M. Mitoraj, A. Michalak, *J. Mol. Model.*, **2007**, *13*, 347.
- [23] PyMOL Molecular Graphics System, Version 1.8.6.2, Schrödinger, LLC.
- [24] (a) R. F. W. Bader, *Chem. Rev.*, **1991**, *91*, 893; (b). R. F. W. Bader, *Atoms in Molecules: A Quantum Theory*, Clarendon Press, Oxford; New York, **1990**
- [25] AIMAll (version 14.06.21), T- A. Keith, TK Gristmill Software, Overland Park KS, USA, **2014**.
- [26] C. Adamo, V. Barone, *J. Chem. Phys.*, **1999**, *110*, 6158.
- [27] J. Tao, J. P. Perdew, V. N. Staroverov, G. E. Scuseria, *Phys. Rev. Lett.*, **2003**, *91*, 146401.
- [28] S. Grimme, *J. Comput. Chem.*, **2006**, *27*, 1787.
- [29] Y. Zhao, D. G. Truhlar, *Theor. Chem. Acc.*, **2008**, *120*, 215.
- [30] T. Yanai, D. Tew, N. Handy, *Chem. Phys. Lett.*, **1994**, *393*, 51.
- [31] J.-D. Chai, M. Head-Gordon, *Phys. Chem. Chem. Phys.*, **2008**, *10*, 6615.
- [32] (a) L. Noodleman L., *J Chem Phys*, **1981**, *74*, 5737-5743; (b) L. Noodleman, E. J. Baerends, *J. Am. Chem. Soc.*, **1984**, *106*, 2316; (c) L. Noodleman, E. R. Davidson ER, *J. Chem. Phys.*, **1986**, *109*,131.

[33] (a) R. Bauernschmitt, R. Ahlrichs, *Chem. Phys. Lett.* **1996**, 256, 454; (b) M. E. Casida, C. Jamorski, K. C. Casida, D. R. Salahub, *J. Chem. Phys.* **1998**, 108, 4439; (c) R.E. Stratmann, G.E.Scuseria, M. J. Frisch, *J. Chem. Phys.* **1998**, 109, 8218.  
[34] A. V. Marenich, C. J. Cramer, D. G. Truhlar, *J. Phys. Chem. B* **2009**, 113, 6378-6396.
